# Supplementary material for: Dormancy-specific imprinting underlies maternal inheritance of seed dormancy in Arabidopsis thaliana
Source: eLife journal article supplement (doi:10.7554/elife.19573), 2016-12-22
Supplement: supp [file elife-19573-supp-v1.zip]

Archive with 28 entries (28 files):
- elife_poa_e19573_Figure_3_figure_supplement_1.pdf
- elife_poa_e19573_Figure_2_source_data_6.xlsx
- elife_poa_e19573_Figure_2_figure_supplement_4.pdf
- elife_poa_e19573_Figure_4_figure_supplement_3.pdf
- elife_poa_e19573_Figure_2_source_data_7.xlsx
- elife_poa_e19573_Supplementary_file2.xlsx
- elife_poa_e19573_Figure_4_figure_supplement_7.pdf
- elife_poa_e19573_Figure_2_source_data_1.xlsx
- elife_poa_e19573_Supplementary_file1.docx
- elife_poa_e19573_Figure_4_figure_supplement_8.pdf
- elife_poa_e19573_Figure_1_figure_supplement_2.pdf
- elife_poa_e19573_Figure_2_figure_supplement_6.pdf
- elife_poa_e19573_Figure_4_figure_supplement_5.pdf
- elife_poa_e19573_Figure_4_figure_supplement_4.pdf
- elife_poa_e19573_Figure_2_source_data_2.xlsx
- elife_poa_e19573_Figure_2_figure_supplement_2.pdf
- elife_poa_e19573_Figure_1_figure_supplement_1.pdf
- elife_poa_e19573_Figure_2_figure_supplement_5.pdf
- elife_poa_e19573_Supplementary_file3.txt
- elife_poa_e19573_Figure_2_source_data_3.xlsx
- elife_poa_e19573_Figure_1_figure_supplement_3.pdf
- elife_poa_e19573_Figure_4_figure_supplement_2.pdf
- elife_poa_e19573_Figure_2_source_data_5.xlsx
- elife_poa_e19573_Figure_2_figure_supplement_1.pdf
- elife_poa_e19573_Figure_4_figure_supplement_6.pdf
- elife_poa_e19573_Figure_4_figure_supplement_1.pdf
- elife_poa_e19573_Figure_2_figure_supplement_3.pdf
- elife_poa_e19573_Figure_2_source_data_4.xlsx
