# Supplementary material for: Dormancy-specific imprinting underlies maternal inheritance of seed dormancy in Arabidopsis thaliana
Source: eLife journal article supplement (doi:10.7554/elife.19573), 2016-12-22
Supplement: supp [file elife-19573-supp-v1.zip › elife_poa_e19573_Figure_2_figure_supplement_6.pdf]

Whole seed

22 °C

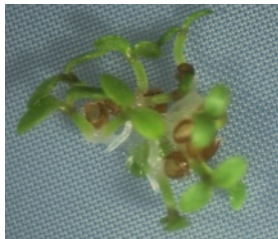

Whole seed

10 °C

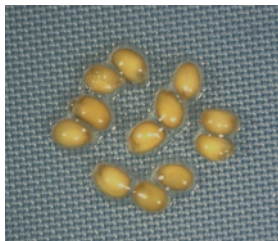

Embryo + Endosperm

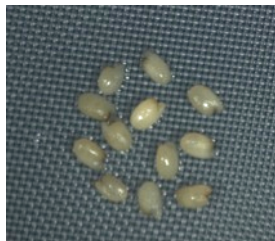

(Only testa is removed)

Embryo

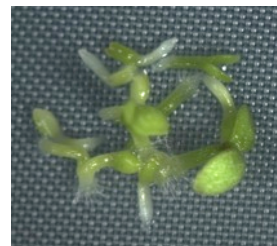

(Testa and endosperm are removed)

Fig.2-figure supplement 6
