# Supplementary material for: Dormancy-specific imprinting underlies maternal inheritance of seed dormancy in Arabidopsis thaliana
Source: eLife journal article supplement (doi:10.7554/elife.19573), 2016-12-22
Supplement: supp [file elife-19573-supp-v1.zip › elife_poa_e19573_Figure_2_source_data_1.xlsx]

## Sheet: Sheet1
Figure 2-source data 1. Differentially expressed genes between the endosperm+testa and endosperm samples
gene_id	gene	endosperm+testa_FPKM	endosperm_FPKM	log2(fold_change)	p_value	q_value	annotation	Expression response to stress
AT1G02520	PGP11	0.803862	5.22147	2.69944	5e-05	0.0163222	PGP11, P-glycoprotein 11	Increase in response to salt stress
AT1G28480	GRX480	46.4216	200.559	2.11116	5e-05	0.0163222	GRX480, roxy19, Thioredoxin superfamily protein	Increase in response to salt stress
AT3G11020	DREB2B	22.5481	72.5491	1.68596	0.0001	0.02712	DREB2, DREB2B, DEHYDRATION-RESPONSIVE ELEMENT BINDING PROTEIN 2	Increase in response to salt and drought stress
AT3G25250	AGC2	9.95483	48.2589	2.27733	5e-05	0.0163222	AGC2, AGC2 KINASE 1, AtOXI1, OXI1, OXIDATIVE SIGNAL-INDUCIBLE1	Increase in response to salt stress
AT3G45730	AT3G45730	19.3814	115.787	2.57873	5e-05	0.0163222	unknown protein
AT4G11300	AT4G11300	20.7592	89.3306	2.10541	5e-05	0.0163222	Protein of unknown function (DUF793)
AT4G28460	AT4G28460	95.9539	618.712	2.68885	5e-05	0.0163222	unknown protein	Increase in response to salt stress
AT4G35985	AT4G35985	34.4809	164.179	2.2514	5e-05	0.0163222	Senescence/dehydration-associated protein-related	Increase in response to Cold,osmotic, salt,drought,wounding
AT5G13200	AT5G13200	34.782	140.707	2.01629	5e-05	0.0163222	GRAM domain family protein	Increase in response to cold and osmotic stress
AT5G22140	AT5G22140	4.23679	35.0417	3.04803	5e-05	0.0163222	FAD/NAD(P)-binding oxidoreductase family protein
AT5G50700	HSD1	0	1.70698	inf	5e-05	0.0163222	HSD1, hydroxysteroid dehydrogenase 1
AT5G67450	AZF1	3.04633	19.6789	2.6915	5e-05	0.0163222	AZF1, ZF1, zinc-finger protein 1
AT1G62510	AT1G62510	40.85	10.1257	-2.01231	0.0002	0.0452	seed storage 2S albumin superfamily protein	decrease in response to drought, genotoxic and wounding stresses
AT4G35100	PIP3	0.57858	0	-inf	5e-05	0.0163222	PIP3, PLASMA MEMBRANE INTRINSIC PROTEIN 3	decrease in response to Cold,osmotic, salt and genotoxic stresses
