# Supplementary material for: Dormancy-specific imprinting underlies maternal inheritance of seed dormancy in Arabidopsis thaliana
Source: eLife journal article supplement (doi:10.7554/elife.19573), 2016-12-22
Supplement: supp [file elife-19573-supp-v1.zip › elife_poa_e19573_Figure_2_source_data_2.xlsx]

## Sheet: Sheet1
Figure 2-source data 2 . RNA-seq data of all genes for Imprinting in endosperm of mature seed
	ColxCvi_Dormant			CvixCol_Dormant				ColxCvi_Non Dormant			CvixCol_Non Dormant
AGI	Col reads	Cvi reads	maternal expresssion ratio	Col reads	Cvi reads	maternal expresssion ratio		Col reads	Cvi reads	maternal expresssion ratio	Col reads	Cvi reads	maternal expresssion ratio
AT1G01020	10	2	0.833333	2	4	0.666667		5	0	1	1	5	0.833333
AT1G01040	111	54	0.672727	31	73	0.701923		82	37	0.689076	29	67	0.697917
AT1G01050	8	0	1	13	1	0.0714286		18	0	1	12	1	0.0769231
AT1G01060	211	70	0.75089	4	10	0.714286		600	244	0.7109	4	8	0.666667
AT1G01080	0	0	-	1	1	0.5		6	0	1	5	1	0.166667
AT1G01090	251	100	0.7151	90	185	0.672727		1056	380	0.735376	315	659	0.676591
AT1G01100	1	0	1	1	2	0.666667		2	0	1	0	1	1
AT1G01130	44	10	0.814815	20	20	0.5		97	57	0.62987	71	326	0.821159
AT1G01160	398	101	0.797595	154	231	0.6		210	59	0.780669	67	130	0.659898
AT1G01170	801	263	0.75282	650	945	0.592476		746	267	0.736426	584	789	0.574654
AT1G01180	77	7	0.916667	29	38	0.567164		668	212	0.759091	300	414	0.579832
AT1G01200	0	0	-	6	50	0.892857		7	12	0.368421	5	24	0.827586
AT1G01210	109	54	0.668712	116	206	0.639752		85	45	0.653846	39	104	0.727273
AT1G01220	40	21	0.655738	17	49	0.742424		152	68	0.690909	51	119	0.7
AT1G01230	791	609	0.565	477	1647	0.775424		928	362	0.71938	448	810	0.643879
AT1G01240	324	113	0.741419	258	529	0.672173		75	30	0.714286	18	35	0.660377
AT1G01260	64	30	0.680851	30	90	0.75		117	42	0.735849	64	81	0.558621
AT1G01290	53	27	0.6625	32	60	0.652174		131	58	0.693122	55	150	0.731707
AT1G01300	10146	1865	0.844726	1734	2650	0.604471		29548	6380	0.822423	22876	22570	0.496633
AT1G01320	355	104	0.77342	144	148	0.506849		1050	228	0.821596	1145	1094	0.488611
AT1G01350	134	50	0.728261	101	173	0.631387		184	63	0.744939	68	140	0.673077
AT1G01355	20	7	0.740741	8	14	0.636364		8	2	0.8	0	0	-
AT1G01370	0	0	-	0	0	-		2	0	1	0	0	-
AT1G01380	90	0	1	0	0	-		2901	400	0.878825	549	393	0.417197
AT1G01420	18	31	0.367347	21	186	0.898551		0	0	-	0	0	-
AT1G01430	41	7	0.854167	21	19	0.475		91	27	0.771186	53	76	0.589147
AT1G01440	22	12	0.647059	14	26	0.65		57	28	0.670588	25	58	0.698795
AT1G01448	79	18	0.814433	34	22	0.392857		70	13	0.843373	19	18	0.486486
AT1G01470	0	0	-	5	6	0.545455		0	0	-	0	0	-
AT1G01480	453	315	0.589844	516	1418	0.733195		6	3	0.666667	0	0	-
AT1G01490	258	74	0.777108	68	155	0.695067		1754	473	0.787607	522	787	0.601222
AT1G01500	83	42	0.664	77	118	0.605128		37	12	0.755102	25	38	0.603175
AT1G01510	73	19	0.793478	25	49	0.662162		126	59	0.681081	53	121	0.695402
AT1G01520	127	69	0.647959	69	143	0.674528		4	3	0.571429	0	0	-
AT1G01540	929	395	0.701662	387	812	0.677231		2016	715	0.738191	838	1238	0.596339
AT1G01550	50	14	0.78125	53	77	0.592308		161	46	0.777778	87	96	0.52459
AT1G01570	1	2	0.333333	2	36	0.947368		2	1	0.666667	3	0	0
AT1G01580	11	23	0.323529	6	72	0.923077		53	13	0.80303	14	35	0.714286
AT1G01600	88	11	0.888889	74	107	0.59116		2	1	0.666667	4	15	0.789474
AT1G01610	0	0	-	0	0	-		0	0	-	0	3	1
AT1G01630	78	10	0.886364	18	17	0.485714		211	63	0.770073	66	71	0.518248
AT1G01640	5	2	0.714286	2	1	0.333333		1	2	0.333333	7	10	0.588235
AT1G01650	45	17	0.725806	7	27	0.794118		166	55	0.751131	67	110	0.621469
AT1G01690	4	2	0.666667	1	19	0.95		6	9	0.4	1	5	0.833333
AT1G01700	16	9	0.64	6	10	0.625		1	3	0.25	0	0	-
AT1G01710	130	71	0.646766	103	211	0.671975		186	90	0.673913	44	123	0.736527
AT1G01715	18	7	0.72	16	49	0.753846		5	0	1	0	2	1
AT1G01720	1848	878	0.677916	1807	3404	0.653234		381	141	0.729885	75	134	0.641148
AT1G01725	2	0	1	3	3	0.5		5	3	0.625	0	0	-
AT1G01730	139	62	0.691542	115	161	0.583333		90	41	0.687023	27	79	0.745283
AT1G01740	8	4	0.666667	3	6	0.666667		5	1	0.833333	1	4	0.8
AT1G01750	16	6	0.727273	13	16	0.551724		22	6	0.785714	9	10	0.526316
AT1G01760	11	3	0.785714	3	8	0.727273		8	5	0.615385	0	5	1
AT1G01770	76	29	0.72381	28	49	0.636364		148	60	0.711538	41	79	0.658333
AT1G01780	61	28	0.685393	25	40	0.615385		113	65	0.634831	43	87	0.669231
AT1G01800	492	90	0.845361	354	272	0.434505		999	228	0.814181	397	502	0.558398
AT1G01820	258	87	0.747826	140	201	0.589443		157	63	0.713636	105	151	0.589844
AT1G01830	53	24	0.688312	32	79	0.711712		64	25	0.719101	54	70	0.564516
AT1G01840	18	8	0.692308	11	25	0.694444		34	20	0.62963	18	34	0.653846
AT1G01860	9	18	0.333333	7	21	0.75		36	10	0.782609	12	20	0.625
AT1G01880	2	2	0.5	3	12	0.8		7	4	0.636364	5	4	0.444444
AT1G01910	55	14	0.797101	43	64	0.598131		271	85	0.761236	95	230	0.707692
AT1G01920	59	42	0.584158	47	64	0.576577		45	33	0.576923	16	41	0.719298
AT1G01930	166	83	0.666667	113	221	0.661677		227	109	0.675595	106	173	0.620072
AT1G01940	1	3	0.25	6	7	0.538462		0	0	-	1	3	0.75
AT1G01950	76	35	0.684685	20	38	0.655172		148	56	0.72549	52	97	0.651007
AT1G01960	470	191	0.711044	234	449	0.657394		607	259	0.700924	241	417	0.633739
AT1G01970	77	40	0.65812	64	148	0.698113		44	26	0.628571	19	57	0.75
AT1G01990	463	234	0.664275	358	648	0.644135		302	99	0.753117	169	269	0.614155
AT1G02000	24	12	0.666667	9	54	0.857143		152	97	0.610442	64	279	0.813411
AT1G02010	18	12	0.6	1	13	0.928571		33	19	0.634615	10	13	0.565217
AT1G02020	133	63	0.678571	68	137	0.668293		123	46	0.727811	39	74	0.654867
AT1G02050	101	17	0.855932	91	36	0.283465		19	4	0.826087	9	8	0.470588
AT1G02060	216	79	0.732203	130	231	0.639889		39	8	0.829787	28	75	0.728155
AT1G02080	774	308	0.715342	267	521	0.661168		1366	546	0.714435	362	640	0.638723
AT1G02090	10	0	1	8	4	0.333333		10	0	1	0	0	-
AT1G02100	196	63	0.756757	124	160	0.56338		202	63	0.762264	70	138	0.663462
AT1G02110	200	89	0.692042	91	198	0.685121		48	13	0.786885	18	25	0.581395
AT1G02120	333	131	0.717672	102	199	0.66113		165	53	0.756881	55	91	0.623288
AT1G02130	159	73	0.685345	73	163	0.690678		221	94	0.701587	88	217	0.711475
AT1G02140	513	200	0.719495	288	511	0.639549		94	44	0.681159	107	184	0.632302
AT1G02145	72	22	0.765957	32	42	0.567568		90	28	0.762712	31	37	0.544118
AT1G02150	191	77	0.712687	137	285	0.675355		56	24	0.7	30	71	0.70297
AT1G02170	1	0	1	0	0	-		2	4	0.333333	0	0	-
AT1G02180	22	15	0.594595	22	70	0.76087		21	16	0.567568	7	26	0.787879
AT1G02260	567	151	0.789694	187	194	0.509186		438	117	0.789189	158	187	0.542029
AT1G02270	257	109	0.702186	127	281	0.688725		522	228	0.696	178	380	0.681004
AT1G02280	1	2	0.333333	2	0	0		3	2	0.6	1	2	0.666667
AT1G02305	3206	1341	0.70508	1831	4283	0.700523		4788	1779	0.7291	2010	4415	0.68716
AT1G02330	846	309	0.732468	573	876	0.604555		1256	376	0.769608	604	843	0.582585
AT1G02350	0	0	-	4	4	0.5		0	0	-	0	0	-
AT1G02370	66	17	0.795181	54	88	0.619718		3	1	0.75	5	7	0.583333
AT1G02380	30	15	0.666667	16	41	0.719298		5	5	0.5	0	3	1
AT1G02390	0	0	-	2	8	0.8		13	7	0.65	18	21	0.538462
AT1G02400	5	0	1	5	2	0.285714		10	1	0.909091	3	0	0
AT1G02405	157	56	0.737089	103	194	0.653199		60	5	0.923077	32	21	0.396226
AT1G02410	43	13	0.767857	23	40	0.634921		56	19	0.746667	21	39	0.65
AT1G02420	28	17	0.622222	26	49	0.653333		17	5	0.772727	12	12	0.5
AT1G02450	0	0	-	0	0	-		10	2	0.833333	9	6	0.4
AT1G02475	8	4	0.666667	14	12	0.461538		55	33	0.625	31	74	0.704762
AT1G02520	31	8	0.794872	27	32	0.542373		248	51	0.829431	169	179	0.514368
AT1G02530	0	0	-	0	5	1		0	0	-	0	10	1
AT1G02560	19	8	0.703704	12	31	0.72093		47	31	0.602564	28	53	0.654321
AT1G02610	22	5	0.814815	13	34	0.723404		86	47	0.646617	37	85	0.696721
AT1G02640	2543	7	0.997255	0	0	-		29866	9597	0.75681	13572	24829	0.646572
AT1G02650	0	0	-	2	4	0.666667		0		-	0	7	1
AT1G02660	341	186	0.647059	223	676	0.751947		97	36	0.729323	30	75	0.714286
AT1G02670	5	3	0.625	2	3	0.6		3	1	0.75	0	1	1
AT1G02680	328	98	0.769953	207	269	0.565126		289	50	0.852507	85	136	0.615385
AT1G02690	136	49	0.735135	84	100	0.543478		16	14	0.533333	14	26	0.65
AT1G02720	48	37	0.564706	22	100	0.819672		135	53	0.718085	85	176	0.67433
AT1G02740	216	55	0.797048	69	110	0.614525		185	68	0.731225	57	83	0.592857
AT1G02750	606	161	0.790091	439	484	0.524377		900	262	0.774527	255	568	0.690158
AT1G02770	516	131	0.797527	327	266	0.448567		454	193	0.7017	236	343	0.592401
AT1G02780	4	6	0.4	0	5	1		4	2	0.666667	0	5	1
AT1G02810	8	5	0.615385	7	16	0.695652		33	13	0.717391	18	55	0.753425
AT1G02816	470	143	0.766721	369	568	0.60619		559	180	0.756428	154	261	0.628916
AT1G02840	278	171	0.619154	180	438	0.708738		182	70	0.722222	59	163	0.734234
AT1G02850	466	170	0.732704	312	466	0.598972		427	144	0.747811	149	285	0.656682
AT1G02860	57	14	0.802817	23	50	0.684932		301	124	0.708235	136	313	0.697105
AT1G02870	87	57	0.604167	78	165	0.679012		7	2	0.777778	8	33	0.804878
AT1G02880	180	78	0.697674	89	154	0.633745		243	89	0.731928	52	111	0.680982
AT1G02890	1573	426	0.786893	640	854	0.57162		3092	848	0.784772	1530	2984	0.661054
AT1G02910	3	0	1	3	0	0		10	1	0.909091	2	2	0.5
AT1G02920	20	19	0.512821	20	47	0.701493		26	12	0.684211	52	155	0.748792
AT1G02970	0	0	-	0	0	-		0	0	-	2	2	0.5
AT1G02990	96	17	0.849558	44	39	0.46988		181	33	0.845794	77	89	0.536145
AT1G03000	57	27	0.678571	24	30	0.555556		146	68	0.682243	53	108	0.670807
AT1G03030	210	105	0.666667	123	240	0.661157		74	36	0.672727	33	49	0.597561
AT1G03040	74	20	0.787234	41	68	0.623853		102	38	0.728571	46	78	0.629032
AT1G03060	138	66	0.676471	48	105	0.686275		292	111	0.724566	172	330	0.657371
AT1G03070	3	3	0.5	2	7	0.777778		0	0	-	0	0	-
AT1G03080	240	84	0.740741	87	126	0.591549		341	103	0.768018	154	217	0.584906
AT1G03090	48	18	0.727273	35	65	0.65		23	7	0.766667	8	21	0.724138
AT1G03100	9	5	0.642857	10	6	0.375		0	0	-	2	4	0.666667
AT1G03103	0	0	-	0	16	1		0	0	-	0	0	-
AT1G03106	18140	17793	0.504828	9075	35443	0.79615		363	2362	0.133211	867	10540	0.923994
AT1G03110	18	6	0.75	9	20	0.689655		6	3	0.666667	4	8	0.666667
AT1G03120	892	376	0.70347	440	710	0.617391		32	11	0.744186	2	15	0.882353
AT1G03130	22	5	0.814815	2	5	0.714286		183	77	0.703846	94	172	0.646617
AT1G03140	82	28	0.745455	65	127	0.661458		100	35	0.740741	42	71	0.628319
AT1G03150	39	15	0.722222	16	66	0.804878		156	60	0.722222	60	123	0.672131
AT1G03160	140	77	0.645161	54	125	0.698324		347	140	0.712526	118	255	0.683646
AT1G03165	1	3	0.25	1	5	0.833333		8	5	0.615385	2	9	0.818182
AT1G03180	0	0	-	0	0	-		2	0	1	1	2	0.666667
AT1G03190	26	27	0.490566	31	49	0.6125		44	19	0.698413	12	32	0.727273
AT1G03200	0	0	-	1	0	0		0	0	-	0	0	-
AT1G03210	17	4	0.809524	7	0	0		56	6	0.903226	10	12	0.545455
AT1G03220	3	1	0.75	2	1	0.333333		0	0	-	2	1	0.333333
AT1G03240	6	0	1	0	0	-		22	5	0.814815	8	14	0.636364
AT1G03250	0	1	0	0	1	1		1	2	0.333333	0	3	1
AT1G03260	28	10	0.736842	6	23	0.793103		43	20	0.68254	14	35	0.714286
AT1G03270	185	110	0.627119	136	181	0.570978		6	2	0.75	5	4	0.444444
AT1G03280	135	40	0.771429	73	154	0.678414		291	82	0.780161	89	171	0.657692
AT1G03290	76	5	0.938272	37	21	0.362069		208	66	0.759124	75	112	0.59893
AT1G03310	33	15	0.6875	19	30	0.612245		78	18	0.8125	27	43	0.614286
AT1G03330	3	0	1	5	7	0.583333		2	1	0.666667	0	4	1
AT1G03340	79	21	0.79	42	49	0.538462		145	37	0.796703	45	48	0.516129
AT1G03350	93	55	0.628378	63	139	0.688119		243	109	0.690341	123	201	0.62037
AT1G03365	51	14	0.784615	24	59	0.710843		40	11	0.784314	13	25	0.657895
AT1G03370	0	0	-	0	0	-		0	0	-	0	1	1
AT1G03400	72	42	0.631579	39	62	0.613861		73	40	0.646018	26	30	0.535714
AT1G03410	141	25	0.849398	49	106	0.683871		373	146	0.71869	127	270	0.680101
AT1G03430	8	0	1	0	3	1		3	1	0.75	0	4	1
AT1G03440	59	32	0.648352	79	103	0.565934		15	5	0.75	14	11	0.44
AT1G03457	0	0	-	0	0	-		2	0	1	1	0	0
AT1G03470	252	86	0.745562	222	302	0.576336		143	43	0.768817	99	143	0.590909
AT1G03495	23	8	0.741935	23	18	0.439024		5	0	1	11	7	0.388889
AT1G03510	12	3	0.8	10	17	0.62963		1	1	0.5	12	7	0.368421
AT1G03520	24	10	0.705882	14	23	0.621622		57	20	0.74026	19	31	0.62
AT1G03530	69	21	0.766667	36	72	0.666667		8	3	0.727273	13	10	0.434783
AT1G03540	5	3	0.625	1	6	0.857143		2	2	0.5	3	5	0.625
AT1G03550	4	0	1	4	5	0.555556		2	2	0.5	3	3	0.5
AT1G03560	70	35	0.666667	33	71	0.682692		89	35	0.717742	40	99	0.71223
AT1G03580	4	1	0.8	10	18	0.642857		8	0	1	15	21	0.583333
AT1G03590	63	20	0.759036	46	64	0.581818		127	52	0.709497	57	130	0.695187
AT1G03600	737	284	0.721841	412	685	0.62443		1193	476	0.714799	453	761	0.626853
AT1G03610	13	2	0.866667	9	9	0.5		106	38	0.736111	79	113	0.588542
AT1G03620	46	16	0.741935	4	11	0.733333		64	17	0.790123	24	36	0.6
AT1G03650	8	2	0.8	7	12	0.631579		0	0	-	3	12	0.8
AT1G03680	129	68	0.654822	140	206	0.595376		222	102	0.685185	162	315	0.660377
AT1G03687	114	85	0.572864	81	185	0.695489		187	102	0.647059	96	218	0.694268
AT1G03710	2	42	0.0454545	3	135	0.978261		7	100	0.0654206	3	232	0.987234
AT1G03730	26	6	0.8125	16	20	0.555556		20	3	0.869565	19	31	0.62
AT1G03740	128	57	0.691892	68	117	0.632432		157	31	0.835106	79	122	0.606965
AT1G03750	35	3	0.921053	13	43	0.767857		64	23	0.735632	13	33	0.717391
AT1G03760	232	62	0.789116	187	229	0.550481		31	5	0.861111	13	18	0.580645
AT1G03770	74	30	0.711538	67	89	0.570513		40	9	0.816327	13	33	0.717391
AT1G03790	22699	7638	0.748228	11833	16392	0.580762		1931	796	0.708104	654	898	0.578608
AT1G03830	11	3	0.785714	3	7	0.7		3	1	0.75	0	0	-
AT1G03850	492	145	0.77237	197	406	0.6733		1720	684	0.715474	651	1461	0.691761
AT1G03890	6	2	0.75	0	6	1		0	0	-	1	6	0.857143
AT1G03900	3	0	1	2	7	0.777778		13	9	0.590909	3	6	0.666667
AT1G03905	16	5	0.761905	10	11	0.52381		6	0	1	0	0	-
AT1G03910	188	82	0.696296	119	173	0.592466		155	58	0.7277	75	114	0.603175
AT1G03930	121	24	0.834483	48	58	0.54717		350	93	0.790068	90	147	0.620253
AT1G03935	8	12	0.4	7	27	0.794118		14	5	0.736842	6	12	0.666667
AT1G03940	24	12	0.666667	16	53	0.768116		21	2	0.913043	19	45	0.703125
AT1G03950	1	2	0.333333	1	3	0.75		6	8	0.428571	1	14	0.933333
AT1G03960	12	8	0.6	0	4	1		9	6	0.6	4	7	0.636364
AT1G03970	21	9	0.7	8	22	0.733333		14	3	0.823529	9	17	0.653846
AT1G03990	23	12	0.657143	18	28	0.608696		28	10	0.736842	6	8	0.571429
AT1G04000	85	39	0.685484	29	64	0.688172		24	7	0.774194	19	27	0.586957
AT1G04020	0	3	0	3	7	0.7		46	20	0.69697	23	39	0.629032
AT1G04030	7	6	0.538462	4	14	0.777778		6	11	0.352941	5	6	0.545455
AT1G04040	14	2	0.875	8	10	0.555556		12	3	0.8	18	16	0.470588
AT1G04050	28	19	0.595745	5	21	0.807692		1	3	0.25	0	0	-
AT1G04067	22	7	0.758621	14	30	0.681818		10	4	0.714286	4	9	0.692308
AT1G04080	707	304	0.699308	297	521	0.636919		594	246	0.707143	284	511	0.642767
AT1G04090	0	0	-	0	0	-		3	2	0.6	1	5	0.833333
AT1G04100	29	8	0.783784	14	21	0.6		17	8	0.68	10	25	0.714286
AT1G04117	18	18	0.5	22	39	0.639344		21	9	0.7	12	29	0.707317
AT1G04120	132	32	0.804878	61	74	0.548148		340	119	0.740741	129	221	0.631429
AT1G04130	45	15	0.75	24	58	0.707317		26	13	0.666667	5	11	0.6875
AT1G04140	540	208	0.721925	257	561	0.685819		752	292	0.720307	299	564	0.653534
AT1G04160	13	6	0.684211	2	4	0.666667		242	109	0.689459	108	228	0.678571
AT1G04170	2900	930	0.75718	1850	3086	0.625203		2303	790	0.744585	1386	2184	0.611765
AT1G04190	535	173	0.75565	373	467	0.555952		319	139	0.696507	129	295	0.695755
AT1G04197	2	0	1	1	4	0.8		3	1	0.75	1	0	0
AT1G04200	115	38	0.751634	53	106	0.666667		402	326	0.552198	192	895	0.823367
AT1G04210	414	202	0.672078	203	393	0.659396		1018	329	0.755754	458	713	0.608881
AT1G04220	0	0	-	0	0	-		16	10	0.615385	25	29	0.537037
AT1G04230	71	34	0.67619	37	55	0.597826		89	39	0.695312	33	65	0.663265
AT1G04250	0	0	-	0	0	-		0	0	-	0	3	1
AT1G04260	24	11	0.685714	25	45	0.642857		52	18	0.742857	25	46	0.647887
AT1G04270	6326	2061	0.754263	4915	6400	0.565621		2929	959	0.753344	2138	2866	0.572742
AT1G04280	683	359	0.65547	233	994	0.810106		2004	879	0.695109	374	999	0.727604
AT1G04290	98	45	0.685315	53	182	0.774468		438	285	0.605809	148	406	0.732852
AT1G04300	438	225	0.660633	226	413	0.646322		343	118	0.744035	126	210	0.625
AT1G04310	231	51	0.819149	127	114	0.473029		125	17	0.880282	294	347	0.541342
AT1G04340	51	24	0.68	33	55	0.625		140	49	0.740741	74	101	0.577143
AT1G04350	74	46	0.616667	36	71	0.663551		57	24	0.703704	64	137	0.681592
AT1G04360	3	2	0.6	4	3	0.428571		0	0	-	2	1	0.333333
AT1G04380	24	4	0.857143	8	3	0.272727		105	4	0.963303	21	10	0.322581
AT1G04390	67	25	0.728261	40	56	0.583333		72	38	0.654545	30	37	0.552239
AT1G04397	0	10	0	2	8	0.8		0	17	0	3	27	0.9
AT1G04400	399	99	0.801205	222	349	0.611208		1013	355	0.740497	380	690	0.64486
AT1G04410	4334	1335	0.764509	2355	3906	0.623862		15153	6150	0.711308	5663	10923	0.658567
AT1G04420	22	7	0.758621	17	20	0.540541		80	34	0.701754	51	66	0.564103
AT1G04430	14	0	1	16	21	0.567568		82	19	0.811881	65	65	0.5
AT1G04440	353	113	0.757511	93	263	0.738764		1173	421	0.735885	436	878	0.668189
AT1G04480	87	60	0.591837	66	139	0.678049		124	47	0.725146	42	89	0.679389
AT1G04487	161	75	0.682203	76	193	0.717472		399	242	0.622465	164	429	0.72344
AT1G04490	8	4	0.666667	2	7	0.777778		156	81	0.658228	48	106	0.688312
AT1G04510	773	394	0.662382	547	928	0.629153		788	316	0.713768	451	729	0.617797
AT1G04530	323	126	0.719376	207	412	0.66559		461	134	0.77479	204	342	0.626374
AT1G04537	30	10	0.75	15	14	0.482759		75	19	0.797872	33	38	0.535211
AT1G04540	14	0	1	0	5	1		78	14	0.847826	52	61	0.539823
AT1G04550	56	28	0.666667	48	61	0.559633		90	44	0.671642	65	97	0.598765
AT1G04580	4	2	0.666667	0	3	1		7	4	0.636364	5	1	0.166667
AT1G04590	792	297	0.727273	586	841	0.589348		429	206	0.675591	272	421	0.607504
AT1G04600	6	2	0.75	2	4	0.666667		0	0	-	3	1	0.25
AT1G04620	60	36	0.625	26	62	0.704545		2	2	0.5	19	50	0.724638
AT1G04630	67	18	0.788235	35	61	0.635417		176	71	0.712551	70	144	0.672897
AT1G04635	34	26	0.566667	52	94	0.643836		24	20	0.545455	13	64	0.831169
AT1G04640	34	13	0.723404	15	23	0.605263		25	4	0.862069	23	29	0.557692
AT1G04690	3	0	1	0	0	-		11	2	0.846154	4	6	0.6
AT1G04700	0	0	-	0	0	-		9	1	0.9	10	4	0.285714
AT1G04710	86	27	0.761062	44	80	0.645161		278	121	0.696742	77	128	0.62439
AT1G04730	0	0	-	1	3	0.75		10	0	1	0	0	-
AT1G04750	144	34	0.808989	88	138	0.610619		352	117	0.750533	191	239	0.555814
AT1G04760	334	239	0.582897	234	651	0.735593		238	143	0.624672	216	589	0.731677
AT1G04770	623	263	0.70316	463	754	0.619556		453	243	0.650862	322	916	0.739903
AT1G04780	209	149	0.583799	133	385	0.743243		483	170	0.739663	262	481	0.647376
AT1G04790	161	57	0.738532	85	148	0.635193		221	71	0.756849	80	129	0.617225
AT1G04810	407	170	0.705373	203	349	0.632246		323	121	0.727477	128	233	0.645429
AT1G04820	14	3	0.823529	4	3	0.428571		257	84	0.753666	116	210	0.644172
AT1G04830	12	11	0.521739	10	15	0.6		18	8	0.692308	9	4	0.307692
AT1G04837	3	2	0.6	1	3	0.75		11	2	0.846154	2	6	0.75
AT1G04840	0	0	-	3	4	0.571429		0	0	-	2	3	0.6
AT1G04850	975	402	0.708061	584	1075	0.647981		1356	542	0.714436	479	846	0.638491
AT1G04860	248	118	0.677596	157	277	0.638249		211	86	0.710438	100	159	0.6139
AT1G04870	187	97	0.658451	138	213	0.606838		62	37	0.626263	47	80	0.629921
AT1G04900	11	5	0.6875	14	13	0.481481		29	11	0.725	27	28	0.509091
AT1G04907	3	13	0.1875	2	26	0.928571		6	9	0.4	0	21	1
AT1G04910	508	235	0.683715	155	462	0.748784		787	377	0.676117	219	545	0.713351
AT1G04920	540	203	0.726783	195	348	0.640884		677	241	0.737473	129	284	0.687651
AT1G04930	0	0	-	0	1	1		1	0	1	0	0	-
AT1G04950	59	21	0.7375	18	50	0.735294		35	8	0.813953	13	22	0.628571
AT1G04960	18	9	0.666667	16	23	0.589744		57	40	0.587629	15	59	0.797297
AT1G04970	156	74	0.678261	97	155	0.615079		399	114	0.777778	143	230	0.616622
AT1G04980	39	12	0.764706	32	82	0.719298		181	62	0.744856	69	134	0.660099
AT1G04985	18	7	0.72	13	18	0.580645		3	1	0.75	0	0	-
AT1G04990	13	20	0.393939	19	117	0.860294		151	46	0.766497	88	138	0.610619
AT1G05000	145	27	0.843023	13	257	0.951852		2525	606	0.806452	959	1149	0.545066
AT1G05010	9	1	0.9	5	4	0.444444		4	1	0.8	9	5	0.357143
AT1G05020	0	0	-	16	16	0.5		22	4	0.846154	17	24	0.585366
AT1G05030	111	14	0.888	55	39	0.414894		155	20	0.885714	52	28	0.35
AT1G05055	209	96	0.685246	122	322	0.725225		286	137	0.676123	155	268	0.63357
AT1G05057	2	2	0.5	3	7	0.7		9	5	0.642857	3	14	0.823529
AT1G05060	709	273	0.721996	422	745	0.638389		534	280	0.65602	229	616	0.728994
AT1G05065	10	8	0.555556	4	15	0.789474		7	20	0.259259	7	35	0.833333
AT1G05070	46	17	0.730159	53	71	0.572581		28	26	0.518519	14	30	0.681818
AT1G05120	137	88	0.608889	78	150	0.657895		140	67	0.676329	41	110	0.728477
AT1G05140	126	56	0.692308	76	197	0.721612		218	75	0.744027	151	236	0.609819
AT1G05150	1285	411	0.757665	937	1214	0.564389		1069	383	0.736226	564	1004	0.640306
AT1G05160	212	122	0.634731	106	267	0.715818		165	62	0.726872	55	109	0.664634
AT1G05163	296	18	0.942675	155	37	0.192708		217	12	0.947598	68	28	0.291667
AT1G05170	56	28	0.666667	33	55	0.625		136	31	0.814371	57	70	0.551181
AT1G05180	30	20	0.6	23	29	0.557692		58	27	0.682353	35	60	0.631579
AT1G05183	34	15	0.693878	32	49	0.604938		6	4	0.6	5	4	0.444444
AT1G05190	74	44	0.627119	60	187	0.757085		335	213	0.611314	303	741	0.70977
AT1G05205	1	1	0.5	0	1	1		1	1	0.5	0	1	1
AT1G05270	307	137	0.691441	153	300	0.662252		399	142	0.737523	152	263	0.633735
AT1G05287	12	5	0.705882	11	18	0.62069		26	15	0.634146	11	18	0.62069
AT1G05300	56	9	0.861538	30	64	0.680851		350	75	0.823529	212	331	0.609576
AT1G05313	10	135	0.0689655	0	314	1		10	9	0.526316	0	31	1
AT1G05333	29	14	0.674419	15	35	0.7		83	40	0.674797	41	56	0.57732
AT1G05337	7	0	1	10	20	0.666667		58	30	0.659091	36	80	0.689655
AT1G05340	165	37	0.816832	126	123	0.493976		7	2	0.777778	5	10	0.666667
AT1G05347	34	10	0.772727	18	19	0.513514		13	6	0.684211	10	6	0.375
AT1G05350	339	123	0.733766	148	304	0.672566		1365	496	0.733477	657	1214	0.648851
AT1G05360	363	99	0.785714	113	224	0.664688		695	250	0.73545	178	495	0.735513
AT1G05370	0	0	-	0	0	-		2	4	0.333333	0	0	-
AT1G05380	328	159	0.673511	231	424	0.647328		306	132	0.69863	124	249	0.66756
AT1G05385	1	1	0.5	2	2	0.5		1	3	0.25	1	4	0.8
AT1G05397	224	116	0.658824	252	355	0.584843		82	27	0.752294	57	63	0.525
AT1G05400	6	2	0.75	5	6	0.545455		12	3	0.8	4	1	0.2
AT1G05410	331	107	0.755708	283	364	0.562597		278	78	0.780899	142	256	0.643216
AT1G05430	420	201	0.676329	195	603	0.755639		1224	383	0.761668	560	947	0.628401
AT1G05460	213	113	0.653374	141	261	0.649254		46	23	0.666667	17	43	0.716667
AT1G05500	1	0	1	1	1	0.5		0	0	-	0	0	-
AT1G05520	89	25	0.780702	52	76	0.59375		170	99	0.63197	71	263	0.787425
AT1G05523	313	105	0.748804	99	169	0.630597		77	42	0.647059	42	50	0.543478
AT1G05557	0	0	-	0	0	-		6	5	0.545455	2	4	0.666667
AT1G05570	61	12	0.835616	6	12	0.666667		712	194	0.785872	358	388	0.520107
AT1G05575	45	30	0.6	64	101	0.612121		91	56	0.619048	93	83	0.471591
AT1G05590	14	12	0.538462	5	27	0.84375		53	34	0.609195	32	65	0.670103
AT1G05600	21	7	0.75	16	26	0.619048		12	4	0.75	6	13	0.684211
AT1G05620	141	138	0.505376	51	284	0.847761		577	1227	0.319845	175	1869	0.914384
AT1G05630	6	4	0.6	4	8	0.666667		25	16	0.609756	5	36	0.878049
AT1G05640	24	10	0.705882	12	33	0.733333		28	14	0.666667	7	14	0.666667
AT1G05670	35	20	0.636364	4	12	0.75		24	11	0.685714	11	9	0.45
AT1G05680	1619	194	0.892995	1001	1177	0.540404		2465	370	0.869489	144	89	0.381974
AT1G05690	7	1	0.875	5	4	0.444444		13	8	0.619048	5	13	0.722222
AT1G05730	6	6	0.5	9	11	0.55		3	2	0.6	1	2	0.666667
AT1G05750	8	1	0.888889	2	5	0.714286		2	1	0.666667	5	3	0.375
AT1G05767	580	201	0.742638	424	593	0.583088		646	248	0.722595	290	470	0.618421
AT1G05780	39	4	0.906977	9	14	0.608696		28	12	0.7	12	22	0.647059
AT1G05785	2	1	0.666667	1	1	0.5		6	1	0.857143	1	3	0.75
AT1G05790	125	44	0.739645	47	52	0.525253		158	59	0.728111	48	93	0.659574
AT1G05830	374	62	0.857798	94	104	0.525253		509	92	0.846922	142	169	0.543408
AT1G05835	2	4	0.333333	3	5	0.625		9	3	0.75	1	2	0.666667
AT1G05840	885	425	0.675573	576	1242	0.683168		444	178	0.713826	168	363	0.683616
AT1G05850	1030	414	0.713296	591	1431	0.707715		4516	1847	0.709728	2284	4452	0.660926
AT1G05860	245	130	0.653333	152	340	0.691057		225	118	0.655977	92	207	0.692308
AT1G05870	40	15	0.727273	24	45	0.652174		120	56	0.681818	16	55	0.774648
AT1G05890	236	77	0.753994	113	106	0.484018		102	33	0.755556	52	51	0.495146
AT1G05894	2	1	0.666667	0	0	-		0	0	-	0	0	-
AT1G05900	24	7	0.774194	5	8	0.615385		65	20	0.764706	15	30	0.666667
AT1G05910	55	24	0.696203	51	81	0.613636		79	40	0.663866	71	133	0.651961
AT1G05913	2	3	0.4	2	7	0.777778		3	0	1	0	0	-
AT1G05937	19	8	0.703704	17	27	0.613636		58	14	0.805556	81	62	0.433566
AT1G05940	437	243	0.642647	161	489	0.752308		673	242	0.735519	212	354	0.625442
AT1G05950	0	0	-	0	0	-		3	1	0.75	1	7	0.875
AT1G05960	421	186	0.693575	219	381	0.635		380	160	0.703704	196	405	0.673877
AT1G05970	55	21	0.723684	39	82	0.677686		25	15	0.625	11	24	0.685714
AT1G05997	0	0	-	2	2	0.5		3	0	1	0	4	1
AT1G06002	61	55	0.525862	19	145	0.884146		222	131	0.628895	100	198	0.66443
AT1G06010	1006	323	0.75696	909	1560	0.631835		280	88	0.76087	107	161	0.600746
AT1G06040	6	4	0.6	2	2	0.5		35	17	0.673077	2	7	0.777778
AT1G06050	34	6	0.85	20	36	0.642857		62	29	0.681319	23	55	0.705128
AT1G06070	22	6	0.785714	20	43	0.68254		50	17	0.746269	25	35	0.583333
AT1G06093	10	10	0.5	2	18	0.9		0	0	-	1	0	0
AT1G06097	6	8	0.428571	1	11	0.916667		0	0	-	0	0	-
AT1G06110	1452	338	0.811173	1038	1067	0.506888		359	89	0.801339	127	211	0.62426
AT1G06130	170	90	0.653846	127	270	0.680101		74	40	0.649123	42	74	0.637931
AT1G06140	4	1	0.8	2	2	0.5		0	0	-	3	6	0.666667
AT1G06143	5	5	0.5	9	30	0.769231		4	6	0.4	2	15	0.882353
AT1G06150	71	13	0.845238	23	60	0.722892		40	17	0.701754	17	30	0.638298
AT1G06173	4	1	0.8	0	0	-		0	0	-	0	0	-
AT1G06190	342	186	0.647727	251	584	0.699401		418	177	0.702521	257	540	0.677541
AT1G06200	536	452	0.54251	404	1531	0.791214		312	136	0.696429	148	303	0.67184
AT1G06210	1143	592	0.65879	691	1612	0.699957		979	478	0.671929	448	820	0.646688
AT1G06220	705	238	0.747614	469	806	0.632157		613	258	0.703789	293	544	0.64994
AT1G06227	92	41	0.691729	69	53	0.434426		54	12	0.818182	34	42	0.552632
AT1G06230	155	69	0.691964	86	199	0.698246		223	88	0.717042	83	175	0.678295
AT1G06240	17	6	0.73913	12	34	0.73913		16	6	0.727273	10	12	0.545455
AT1G06250	42	13	0.763636	7	19	0.730769		19	10	0.655172	2	17	0.894737
AT1G06260	19	4	0.826087	3	8	0.727273		16	4	0.8	8	10	0.555556
AT1G06265	52	14	0.787879	10	13	0.565217		29	15	0.659091	10	50	0.833333
AT1G06270	120	35	0.774194	74	97	0.567251		130	28	0.822785	63	62	0.496
AT1G06290	2810	818	0.774531	1414	2555	0.643739		24303	11211	0.684322	8479	19847	0.700664
AT1G06320	13	14	0.481481	0	49	1		1	2	0.333333	2	19	0.904762
AT1G06330	0	0	-	1	7	0.875		0	0	-	0	0	-
AT1G06370	30	26	0.535714	19	28	0.595745		15	26	0.365854	3	46	0.938776
AT1G06380	277	117	0.703046	216	394	0.645902		59	78	0.430657	76	424	0.848
AT1G06390	871	380	0.696243	398	652	0.620952		732	564	0.564815	373	1112	0.748822
AT1G06400	3	2	0.6	1	3	0.75		2	4	0.333333	1	2	0.666667
AT1G06410	175	76	0.697211	105	178	0.628975		485	274	0.638999	161	384	0.704587
AT1G06430	85	26	0.765766	51	84	0.622222		121	22	0.846154	31	60	0.659341
AT1G06440	3	2	0.6	2	1	0.333333		0	0	-	0	0	-
AT1G06450	29	12	0.707317	15	10	0.4		17	2	0.894737	20	50	0.714286
AT1G06460	50	27	0.649351	30	44	0.594595		11	3	0.785714	78	139	0.640553
AT1G06470	69	24	0.741935	37	46	0.554217		245	86	0.740181	119	195	0.621019
AT1G06473	828	37	0.957225	760	167	0.180151		14	16	0.466667	11	3	0.214286
AT1G06487	4	0	1	1	6	0.857143		0	0	-	0	0	-
AT1G06500	105	39	0.729167	77	101	0.567416		43	31	0.581081	20	47	0.701493
AT1G06510	38	21	0.644068	13	32	0.711111		24	10	0.705882	14	32	0.695652
AT1G06515	0	1	0	0	0	-		2	0	1	2	1	0.333333
AT1G06520	16	4	0.8	4	5	0.555556		424	44	0.905983	150	91	0.377593
AT1G06530	1023	354	0.742919	658	1024	0.608799		674	318	0.679435	412	851	0.673793
AT1G06537	129	32	0.801242	31	52	0.626506		146	53	0.733668	64	227	0.780069
AT1G06550	30	24	0.555556	33	76	0.697248		144	70	0.672897	40	119	0.748428
AT1G06560	63	35	0.642857	39	52	0.571429		22	11	0.666667	18	24	0.571429
AT1G06577	0	0	-	0	0	-		0	8	0	0	8	1
AT1G06580	55	19	0.743243	39	41	0.5125		49	21	0.7	30	52	0.634146
AT1G06590	70	38	0.648148	23	55	0.705128		109	73	0.598901	48	94	0.661972
AT1G06593	3	3	0.5	0	0	-		1	3	0.25	0	0	-
AT1G06630	89	46	0.659259	51	98	0.657718		64	24	0.727273	24	30	0.555556
AT1G06645	214	33	0.866397	173	142	0.450794		29	22	0.568627	21	37	0.637931
AT1G06650	104	46	0.693333	62	123	0.664865		232	115	0.668588	101	250	0.712251
AT1G06670	1198	565	0.679524	769	1252	0.619495		981	284	0.775494	442	669	0.60216
AT1G06680	107	25	0.810606	21	73	0.776596		1007	319	0.759427	290	538	0.649758
AT1G06690	11	6	0.647059	4	16	0.8		19	7	0.730769	5	12	0.705882
AT1G06700	243	110	0.688385	120	304	0.716981		458	143	0.762063	189	333	0.637931
AT1G06710	9	0	1	2	5	0.714286		2	1	0.666667	1	4	0.8
AT1G06720	221	113	0.661677	118	233	0.663818		27	19	0.586957	14	50	0.78125
AT1G06727	9	28	0.243243	4	44	0.916667		79	22	0.782178	4	16	0.8
AT1G06730	55	12	0.820896	28	54	0.658537		67	24	0.736264	41	52	0.55914
AT1G06737	29	35	0.453125	6	31	0.837838		26	29	0.472727	6	32	0.842105
AT1G06740	24	14	0.631579	11	19	0.633333		7	2	0.777778	12	19	0.612903
AT1G06743	13	21	0.382353	1	24	0.96		26	18	0.590909	1	19	0.95
AT1G06760	1085	575	0.653614	778	1643	0.678645		1608	768	0.676768	644	1413	0.686923
AT1G06770	33	15	0.6875	21	37	0.637931		15	18	0.454545	11	27	0.710526
AT1G06773	5	4	0.555556	2	0	0		4	1	0.8	2	0	0
AT1G06780	23	10	0.69697	9	20	0.689655		55	13	0.808824	28	28	0.5
AT1G06790	6	0	1	3	7	0.7		16	3	0.842105	6	8	0.571429
AT1G06800	13	4	0.764706	5	8	0.615385		17	8	0.68	6	14	0.7
AT1G06820	96	46	0.676056	41	100	0.70922		234	99	0.702703	80	214	0.727891
AT1G06827	0	3	0	0	17	1		0	10	0	1	25	0.961538
AT1G06837	0	0	-	10	2	0.166667		50	0	1	0	4	1
AT1G06840	98	19	0.837607	42	49	0.538462		144	15	0.90566	51	28	0.35443
AT1G06870	37	11	0.770833	23	64	0.735632		200	71	0.738007	79	149	0.653509
AT1G06883	53	15	0.779412	1	85	0.988372		2327	727	0.761952	21	1044	0.980282
AT1G06890	116	41	0.738854	42	90	0.681818		226	96	0.701863	134	244	0.645503
AT1G06900	81	32	0.716814	73	133	0.645631		89	51	0.635714	38	68	0.641509
AT1G06910	34	14	0.708333	20	59	0.746835		33	18	0.647059	11	30	0.731707
AT1G06950	544	230	0.702842	324	566	0.635955		535	205	0.722973	300	533	0.639856
AT1G06960	23	6	0.793103	4	11	0.733333		29	7	0.805556	6	12	0.666667
AT1G06987	0	0	-	0	0	-		0	0	-	0	6	1
AT1G06997	16	30	0.347826	0	42	1		9	30	0.230769	1	59	0.983333
AT1G07000	20	13	0.606061	24	65	0.730337		102	38	0.728571	51	129	0.716667
AT1G07010	17	5	0.772727	2	3	0.6		33	16	0.673469	11	24	0.685714
AT1G07030	215	100	0.68254	119	240	0.668524		118	52	0.694118	42	88	0.676923
AT1G07040	182	54	0.771186	111	213	0.657407		311	99	0.758537	74	154	0.675439
AT1G07070	3	0	1	1	0	0		0	0	-	2	0	0
AT1G07080	6333	1651	0.793211	2959	3931	0.570537		4746	1569	0.751544	2095	3041	0.592095
AT1G07090	195	106	0.647841	68	143	0.677725		137	30	0.820359	52	35	0.402299
AT1G07110	250	93	0.728863	115	190	0.622951		399	158	0.716338	136	247	0.644909
AT1G07119	50	22	0.694444	27	71	0.72449		22	13	0.628571	14	27	0.658537
AT1G07128	18	9	0.666667	9	17	0.653846		7	4	0.636364	9	9	0.5
AT1G07135	25	14	0.641026	63	78	0.553191		72	16	0.818182	76	67	0.468531
AT1G07140	848	209	0.802271	569	706	0.553725		1438	351	0.803801	847	774	0.477483
AT1G07143	2	3	0.4	0	4	1		1	13	0.0714286	0	28	1
AT1G07150	258	76	0.772455	171	186	0.521008		148	48	0.755102	226	315	0.582255
AT1G07160	0	0	-	3	3	0.5		5	3	0.625	42	65	0.607477
AT1G07170	3	2	0.6	2	11	0.846154		3	0	1	4	11	0.733333
AT1G07180	176	76	0.698413	89	170	0.656371		0	0	-	0	0	-
AT1G07187	3	0	1	0	0	-		20	8	0.714286	3	4	0.571429
AT1G07200	33	18	0.647059	13	40	0.754717		31	12	0.72093	20	36	0.642857
AT1G07210	161	67	0.70614	124	188	0.602564		205	81	0.716783	101	244	0.707246
AT1G07220	77	29	0.726415	42	94	0.691176		142	74	0.657407	79	210	0.726644
AT1G07230	416	164	0.717241	275	488	0.639581		192	83	0.698182	100	231	0.697885
AT1G07240	254	100	0.717514	132	239	0.644205		374	134	0.73622	116	200	0.632911
AT1G07250	453	124	0.785095	360	407	0.530639		347	252	0.579299	175	559	0.76158
AT1G07260	26	14	0.65	13	48	0.786885		2	1	0.666667	1	7	0.875
AT1G07280	409	246	0.624427	370	793	0.681857		97	38	0.718519	129	182	0.585209
AT1G07290	0	0	-	0	1	1		0	1	0	0	0	-
AT1G07300	27	11	0.710526	7	45	0.865385		23	20	0.534884	7	36	0.837209
AT1G07310	290	122	0.703883	128	226	0.638418		263	107	0.710811	150	209	0.582173
AT1G07313	10	3	0.769231	3	4	0.571429		2	1	0.666667	2	8	0.8
AT1G07320	1036	408	0.717452	664	967	0.592888		991	453	0.686288	1030	1772	0.632405
AT1G07323	65	2	0.970149	29	23	0.442308		103	5	0.953704	107	93	0.465
AT1G07350	542	150	0.783237	310	470	0.602564		1216	330	0.786546	258	322	0.555172
AT1G07360	829	337	0.710978	448	864	0.658537		1085	494	0.687144	543	1014	0.651252
AT1G07380	185	72	0.719844	59	111	0.652941		402	128	0.758491	152	300	0.663717
AT1G07390	5	3	0.625	5	2	0.285714		0	0	-	1	3	0.75
AT1G07400	150	46	0.765306	97	153	0.612		100	27	0.787402	64	138	0.683168
AT1G07410	6	1	0.857143	5	4	0.444444		41	9	0.82	20	28	0.583333
AT1G07420	88	40	0.6875	45	81	0.642857		43	9	0.826923	30	56	0.651163
AT1G07430	950	385	0.71161	670	1198	0.641328		220	62	0.780142	106	224	0.678788
AT1G07433	0	0	-	7	0	0		0	0	-	2	1	0.333333
AT1G07440	96	45	0.680851	69	172	0.713693		133	69	0.658416	121	278	0.696742
AT1G07470	85	43	0.664062	46	76	0.622951		124	52	0.704545	53	101	0.655844
AT1G07473	46	26	0.638889	64	101	0.612121		0	0	-	0	0	-
AT1G07480	98	44	0.690141	70	90	0.5625		91	39	0.7	29	69	0.704082
AT1G07493	0	0	-	5	5	0.5		0	0	-	0	7	1
AT1G07510	1221	531	0.696918	588	1216	0.674058		433	159	0.731419	172	334	0.660079
AT1G07513	29	7	0.805556	14	10	0.416667		37	11	0.770833	71	79	0.526667
AT1G07530	276	135	0.671533	184	337	0.646833		216	65	0.768683	72	133	0.64878
AT1G07570	85	63	0.574324	70	182	0.722222		113	88	0.562189	39	107	0.732877
AT1G07590	32	2	0.941176	2	1	0.333333		670	233	0.741971	72	146	0.669725
AT1G07610	36	11	0.765957	6	7	0.538462		735	50	0.936306	58	40	0.408163
AT1G07615	190	76	0.714286	121	259	0.681579		34	14	0.708333	23	54	0.701299
AT1G07630	89	24	0.787611	54	118	0.686047		320	116	0.733945	108	214	0.664596
AT1G07645	3733	2054	0.645067	2447	5582	0.69523		66	40	0.622642	46	127	0.734104
AT1G07650	8	3	0.727273	3	3	0.5		11	0	1	3	2	0.4
AT1G07660	255	62	0.804416	178	154	0.463855		251	87	0.742604	122	196	0.616352
AT1G07670	829	197	0.807992	277	488	0.637908		4755	2205	0.68319	1943	4250	0.686259
AT1G07700	0	0	-	4	0	0		7	6	0.538462	0	2	1
AT1G07705	69	39	0.638889	40	73	0.646018		261	74	0.779104	97	193	0.665517
AT1G07725	121	27	0.817568	67	129	0.658163		100	39	0.719424	62	82	0.569444
AT1G07740	28	19	0.595745	26	32	0.551724		19	16	0.542857	17	24	0.585366
AT1G07745	26	14	0.65	21	31	0.596154		11	9	0.55	15	10	0.4
AT1G07750	85	25	0.772727	87	77	0.469512		83	26	0.761468	27	36	0.571429
AT1G07780	126	185	0.405145	55	303	0.846369		29	93	0.237705	16	181	0.918782
AT1G07790	195	146	0.571848	127	437	0.774823		399	261	0.604545	169	578	0.773762
AT1G07810	138	31	0.816568	54	129	0.704918		494	175	0.738416	174	350	0.667939
AT1G07820	165	81	0.670732	137	255	0.65051		170	84	0.669291	85	247	0.743976
AT1G07830	558	265	0.678007	436	844	0.659375		134	54	0.712766	63	141	0.691176
AT1G07840	65	33	0.663265	45	61	0.575472		34	12	0.73913	19	27	0.586957
AT1G07870	88	25	0.778761	39	84	0.682927		105	46	0.695364	36	116	0.763158
AT1G07890	168	16	0.913043	28	30	0.517241		1991	652	0.753311	613	1237	0.668649
AT1G07902	65	124	0.343915	56	259	0.822222		208	254	0.450216	76	389	0.836559
AT1G07910	226	87	0.722045	85	151	0.639831		105	94	0.527638	33	102	0.755556
AT1G07920	225	117	0.657895	115	275	0.705128		281	176	0.61488	137	332	0.707889
AT1G07930	2756	1345	0.672031	2029	3820	0.653103		2255	1196	0.653434	1396	3098	0.689364
AT1G07940	4040	2142	0.65351	3026	6677	0.688138		4301	2294	0.652161	2489	5793	0.699469
AT1G07950	30	5	0.857143	12	6	0.333333		34	8	0.809524	16	19	0.542857
AT1G07960	99	13	0.883929	81	73	0.474026		168	42	0.8	88	112	0.56
AT1G07970	88	28	0.758621	47	92	0.661871		40	25	0.615385	40	68	0.62963
AT1G07980	199	77	0.721014	109	203	0.650641		145	68	0.680751	38	130	0.77381
AT1G07985	299	79	0.791005	293	263	0.473022		16	3	0.842105	3	9	0.75
AT1G07990	724	260	0.735772	291	556	0.656434		1249	456	0.732551	326	576	0.638581
AT1G08000	254	128	0.664921	180	299	0.624217		321	133	0.707048	213	419	0.662975
AT1G08010	183	60	0.753086	95	114	0.545455		231	69	0.77	149	190	0.560472
AT1G08030	31	14	0.688889	20	25	0.555556		49	12	0.803279	20	28	0.583333
AT1G08033	0	1	0	0	2	1		0	0	-	0	0	-
AT1G08037	210	6	0.972222	167	32	0.160804		433	33	0.929185	271	56	0.171254
AT1G08040	0	2	0	0	0	-		2	0	1	0	0	-
AT1G08043	4	3	0.571429	3	5	0.625		9	1	0.9	2	15	0.882353
AT1G08050	100	31	0.763359	45	152	0.771574		108	63	0.631579	65	150	0.697674
AT1G08060	160	86	0.650407	80	136	0.62963		230	77	0.749186	95	211	0.689542
AT1G08070	1	3	0.25	0	2	1		0	0	-	2	8	0.8
AT1G08103	0	0	-	4	2	0.333333		0	0	-	0	0	-
AT1G08110	1073	445	0.706851	657	1092	0.624357		680	230	0.747253	253	444	0.637016
AT1G08115	37	4	0.902439	11	11	0.5		33	7	0.825	11	3	0.214286
AT1G08125	110	90	0.55	58	184	0.760331		100	54	0.649351	43	75	0.635593
AT1G08130	315	130	0.707865	185	215	0.5375		348	155	0.691849	171	295	0.633047
AT1G08170	426	140	0.75265	365	370	0.503401		4	2	0.666667	0	0	-
AT1G08180	17	3	0.85	9	3	0.25		8	3	0.727273	10	8	0.444444
AT1G08190	1560	501	0.756914	597	908	0.603322		3696	1157	0.761591	1247	2108	0.628316
AT1G08200	914	265	0.775233	505	775	0.605469		4119	1571	0.723902	1654	2838	0.63179
AT1G08210	30	9	0.769231	9	14	0.608696		15	5	0.75	3	2	0.4
AT1G08220	87	39	0.690476	64	156	0.709091		54	18	0.75	52	51	0.495146
AT1G08230	959	33	0.966734	562	181	0.243607		3187	400	0.888486	1013	432	0.298962
AT1G08250	32	12	0.727273	28	59	0.678161		24	1	0.96	8	14	0.636364
AT1G08260	70	34	0.673077	28	49	0.636364		54	19	0.739726	15	38	0.716981
AT1G08270	33	24	0.578947	20	47	0.701493		15	6	0.714286	19	33	0.634615
AT1G08280	201	61	0.767176	231	310	0.573013		1078	499	0.683576	776	1543	0.665373
AT1G08300	56	26	0.682927	26	41	0.61194		54	15	0.782609	29	27	0.482143
AT1G08310	3	4	0.428571	2	10	0.833333		10	4	0.714286	6	9	0.6
AT1G08320	395	112	0.779093	138	268	0.660099		902	419	0.682816	233	460	0.663781
AT1G08340	0	0	-	2	4	0.666667		10	32	0.238095	1	53	0.981481
AT1G08350	20	3	0.869565	11	17	0.607143		48	12	0.8	30	43	0.589041
AT1G08353	0	0	-	0	6	1		0	0	-	0	0	-
AT1G08360	2	1	0.666667	0	2	1		1	0	1	0	3	1
AT1G08370	1	0	1	0	0	-		5	1	0.833333	3	2	0.4
AT1G08390	10	5	0.666667	6	11	0.647059		10	3	0.769231	4	9	0.692308
AT1G08400	8	4	0.666667	4	12	0.75		6	0	1	2	3	0.6
AT1G08410	65	27	0.706522	48	68	0.586207		25	8	0.757576	14	32	0.695652
AT1G08420	172	47	0.785388	67	100	0.598802		364	76	0.827273	146	165	0.530547
AT1G08450	1	0	1	0	2	1		2	0	1	1	0	0
AT1G08460	208	87	0.705085	153	266	0.634845		191	59	0.764	69	124	0.642487
AT1G08480	13	5	0.722222	10	9	0.473684		17	6	0.73913	8	10	0.555556
AT1G08490	74	32	0.698113	38	54	0.586957		129	50	0.72067	39	101	0.721429
AT1G08500	0	0	-	1	3	0.75		1	2	0.333333	2	3	0.6
AT1G08510	28	13	0.682927	10	17	0.62963		49	24	0.671233	27	54	0.666667
AT1G08520	0	0	-	0	0	-		1	0	1	0	0	-
AT1G08530	83	41	0.669355	46	116	0.716049		158	66	0.705357	68	112	0.622222
AT1G08540	513	216	0.703704	243	591	0.708633		1636	587	0.735942	870	1725	0.66474
AT1G08550	147	93	0.6125	114	208	0.645963		121	59	0.672222	114	285	0.714286
AT1G08560	0	0	-	0	0	-		5	0	1	13	11	0.458333
AT1G08570	5060	1858	0.731425	3389	5346	0.612021		939	460	0.671194	531	1272	0.705491
AT1G08580	352	194	0.644689	369	577	0.609937		291	277	0.512324	326	601	0.648328
AT1G08590	378	147	0.72	103	563	0.845345		4403	2726	0.617618	2554	7701	0.750951
AT1G08600	349	215	0.618794	141	350	0.712831		500	392	0.560538	169	543	0.76264
AT1G08603	0	0	-	0	3	1		0	0	-	0	0	-
AT1G08610	75	10	0.882353	91	52	0.363636		28	8	0.777778	16	13	0.448276
AT1G08620	155	56	0.734597	89	163	0.646825		484	175	0.734446	168	375	0.690608
AT1G08630	364	330	0.524496	66	453	0.872832		17	9	0.653846	14	67	0.82716
AT1G08640	327	134	0.709328	164	322	0.662551		331	97	0.773364	155	265	0.630952
AT1G08643	13	4	0.764706	4	15	0.789474		21	6	0.777778	1	6	0.857143
AT1G08645	1048	100	0.912892	215	235	0.522222		4328	951	0.819852	1208	1403	0.537342
AT1G08650	1014	84	0.923497	251	282	0.529081		4233	1039	0.802921	1092	1364	0.555375
AT1G08660	82	32	0.719298	34	44	0.564103		131	34	0.793939	29	67	0.697917
AT1G08680	203	68	0.749077	76	151	0.665198		622	199	0.757613	194	317	0.620352
AT1G08710	51	13	0.796875	25	41	0.621212		58	30	0.659091	18	43	0.704918
AT1G08720	60	22	0.731707	11	50	0.819672		106	37	0.741259	33	75	0.694444
AT1G08723	9	2	0.818182	3	6	0.666667		16	4	0.8	7	7	0.5
AT1G08750	36	15	0.705882	17	30	0.638298		90	28	0.762712	33	54	0.62069
AT1G08760	32	17	0.653061	11	34	0.755556		51	25	0.671053	18	37	0.672727
AT1G08770	18	2	0.9	14	22	0.611111		49	19	0.720588	22	45	0.671642
AT1G08780	72	19	0.791209	40	59	0.59596		72	29	0.712871	34	61	0.642105
AT1G08800	72	22	0.765957	30	41	0.577465		160	42	0.792079	88	148	0.627119
AT1G08820	7	3	0.7	1	19	0.95		17	1	0.944444	2	4	0.666667
AT1G08830	94	36	0.723077	233	260	0.527383		70	33	0.679612	437	729	0.625214
AT1G08840	10	23	0.30303	11	20	0.645161		4	12	0.25	4	4	0.5
AT1G08845	16	11	0.592593	3	18	0.857143		11	8	0.578947	3	18	0.857143
AT1G08860	0	0	-	1	2	0.666667		9	2	0.818182	7	13	0.65
AT1G08880	414	239	0.633997	231	637	0.733871		520	385	0.574586	198	545	0.733513
AT1G08890	15	6	0.714286	5	8	0.615385		72	56	0.5625	60	134	0.690722
AT1G08900	0	0	-	0	0	-		0	1	0	0	0	-
AT1G08910	570	239	0.704574	267	545	0.671182		251	89	0.738235	129	173	0.572848
AT1G08920	14	3	0.823529	0	0	-		192	54	0.780488	75	163	0.684874
AT1G08930	374	89	0.807775	88	161	0.646586		1201	311	0.794312	797	1062	0.571275
AT1G08960	6	2	0.75	5	6	0.545455		22	8	0.733333	8	21	0.724138
AT1G08970	57	29	0.662791	42	85	0.669291		50	29	0.632911	21	52	0.712329
AT1G08973	1	3	0.25	4	7	0.636364		55	27	0.670732	16	39	0.709091
AT1G09000	2	1	0.666667	0	0	-		3	2	0.6	0	7	1
AT1G09010	697	345	0.668906	425	819	0.65836		815	303	0.72898	338	627	0.649741
AT1G09020	45	10	0.818182	12	27	0.692308		134	63	0.680203	51	143	0.737113
AT1G09023	9	2	0.818182	0	0	-		7	2	0.777778	6	18	0.75
AT1G09040	6	6	0.5	1	12	0.923077		6	5	0.545455	5	5	0.5
AT1G09050	0	0	-	0	0	-		5	0	1	3	6	0.666667
AT1G09060	114	26	0.814286	49	72	0.595041		154	56	0.733333	66	144	0.685714
AT1G09070	1471	542	0.73075	1053	1956	0.65005		1732	678	0.718672	839	1602	0.656288
AT1G09130	127	62	0.671958	90	192	0.680851		258	120	0.68254	99	200	0.668896
AT1G09140	749	343	0.685897	380	645	0.629268		793	227	0.777451	288	423	0.594937
AT1G09150	127	63	0.668421	53	150	0.738916		110	67	0.621469	48	125	0.722543
AT1G09160	86	36	0.704918	8	48	0.857143		242	94	0.720238	127	217	0.630814
AT1G09180	0	0	-	0	0	-		9	12	0.428571	0	0	-
AT1G09190	73	40	0.646018	65	91	0.583333		40	16	0.714286	80	169	0.678715
AT1G09195	325	306	0.515055	115	438	0.792043		519	335	0.607728	91	307	0.771357
AT1G09200	797	181	0.814928	304	384	0.55814		2574	588	0.814042	1147	1377	0.545563
AT1G09210	999	380	0.724438	294	895	0.752733		7252	3975	0.645943	2031	5948	0.745457
AT1G09217	8	0	1	2	12	0.857143		229	83	0.733974	87	218	0.714754
AT1G09220	59	32	0.648352	66	135	0.671642		5	4	0.555556	47	65	0.580357
AT1G09230	511	190	0.728959	130	357	0.73306		805	357	0.692771	258	553	0.681874
AT1G09247	172	38	0.819048	156	221	0.586207		91	19	0.827273	66	56	0.459016
AT1G09260	0	0	-	0	4	1		0	0	-	0	0	-
AT1G09280	4	6	0.4	0	2	1		4	0	1	0	1	1
AT1G09290	21	13	0.617647	20	16	0.444444		13	9	0.590909	6	21	0.777778
AT1G09300	2	1	0.666667	0	0	-		3	0	1	1	2	0.666667
AT1G09317	0	0	-	0	0	-		3	3	0.5	0	3	1
AT1G09320	39	14	0.735849	23	35	0.603448		11	2	0.846154	8	21	0.724138
AT1G09323	18	6	0.75	17	11	0.392857		19	8	0.703704	10	17	0.62963
AT1G09357	10	6	0.625	5	12	0.705882		0	0	-	0	0	-
AT1G09380	130	18	0.878378	5	9	0.642857		1343	528	0.717798	778	1584	0.670618
AT1G09390	53	12	0.815385	18	11	0.37931		133	28	0.826087	35	48	0.578313
AT1G09400	12	8	0.6	7	8	0.533333		22	7	0.758621	1	3	0.75
AT1G09410	7	4	0.636364	5	6	0.545455		4	1	0.8	1	3	0.75
AT1G09415	23	4	0.851852	6	8	0.571429		74	20	0.787234	41	58	0.585859
AT1G09420	140	107	0.566802	89	260	0.744986		89	109	0.449495	39	149	0.792553
AT1G09430	326	82	0.79902	214	184	0.462312		791	207	0.792585	197	335	0.629699
AT1G09460	0	0	-	0	1	1		1	1	0.5	5	5	0.5
AT1G09470	0	0	-	0	0	-		0	1	0	0	0	-
AT1G09490	49	12	0.803279	24	24	0.5		47	13	0.783333	29	23	0.442308
AT1G09500	159	60	0.726027	189	236	0.555294		10	7	0.588235	4	14	0.777778
AT1G09520	75	33	0.694444	65	132	0.670051		48	18	0.727273	27	60	0.689655
AT1G09530	2796	873	0.762061	1062	2045	0.658191		4056	3019	0.573286	2273	4991	0.687087
AT1G09560	1433	930	0.606433	748	2652	0.78		4654	994	0.824008	3662	4936	0.574087
AT1G09570	8280	2183	0.79136	3396	5689	0.626197		34313	11842	0.74343	11234	19892	0.63908
AT1G09575	11	1	0.916667	5	11	0.6875		78	28	0.735849	40	80	0.666667
AT1G09580	108	42	0.72	105	159	0.602273		278	137	0.66988	134	257	0.657289
AT1G09583	0	3	0	0	9	1		0	3	0	0	9	1
AT1G09590	708	311	0.694799	426	680	0.614828		614	243	0.716453	388	625	0.616979
AT1G09600	6	4	0.6	2	5	0.714286		9	1	0.9	2	2	0.5
AT1G09620	602	270	0.690367	388	716	0.648551		294	146	0.668182	200	355	0.63964
AT1G09627	43	12	0.781818	42	44	0.511628		105	29	0.783582	48	74	0.606557
AT1G09630	0	0	-	0	2	1		13	3	0.8125	3	3	0.5
AT1G09640	1283	543	0.702629	878	1395	0.613726		450	236	0.655977	274	497	0.644617
AT1G09645	223	71	0.758503	130	225	0.633803		477	151	0.759554	202	285	0.585216
AT1G09650	12	2	0.857143	2	3	0.6		39	18	0.684211	17	52	0.753623
AT1G09660	1	0	1	0	4	1		2	0	1	0	0	-
AT1G09680	218	71	0.754325	197	242	0.551253		35	5	0.875	66	55	0.454545
AT1G09690	22	6	0.785714	32	33	0.507692		34	6	0.85	11	24	0.685714
AT1G09693	0	0	-	1	2	0.666667		0	0	-	1	1	0.5
AT1G09700	80	46	0.634921	62	171	0.733906		64	25	0.719101	69	83	0.546053
AT1G09710	59	49	0.546296	46	77	0.626016		61	10	0.859155	22	38	0.633333
AT1G09730	246	107	0.696884	114	223	0.661721		359	139	0.720884	172	294	0.630901
AT1G09740	18	2	0.9	4	8	0.666667		53	10	0.84127	12	15	0.555556
AT1G09750	2	4	0.333333	3	1	0.25		6	0	1	7	5	0.416667
AT1G09760	941	315	0.749204	664	1056	0.613953		907	432	0.677371	562	917	0.620014
AT1G09770	5909	1471	0.800678	4648	4365	0.4843		2799	1054	0.726447	1669	2341	0.583791
AT1G09780	178	19	0.903553	33	45	0.576923		3202	1090	0.746039	1721	3144	0.646249
AT1G09783	71	20	0.78022	22	39	0.639344		98	22	0.816667	17	28	0.622222
AT1G09793	10	2	0.833333	2	7	0.777778		38	7	0.844444	32	23	0.418182
AT1G09794	21	11	0.65625	17	19	0.527778		43	14	0.754386	13	17	0.566667
AT1G09795	308	141	0.685969	220	414	0.652997		216	77	0.737201	124	223	0.642651
AT1G09800	19	14	0.575758	14	34	0.708333		11	4	0.733333	9	8	0.470588
AT1G09810	154	63	0.709677	118	132	0.528		101	37	0.731884	60	113	0.653179
AT1G09815	254	137	0.649616	198	426	0.682692		208	65	0.761905	104	190	0.646259
AT1G09820	191	104	0.647458	133	341	0.719409		163	78	0.676349	94	267	0.739612
AT1G09830	552	136	0.802326	373	452	0.547879		483	234	0.67364	281	411	0.593931
AT1G09840	407	170	0.705373	182	398	0.686207		503	274	0.647362	248	698	0.737844
AT1G09863	192	106	0.644295	77	149	0.659292		241	91	0.725904	57	131	0.696809
AT1G09867	39	9	0.8125	16	19	0.542857		12	5	0.705882	12	16	0.571429
AT1G09870	720	291	0.712166	416	776	0.651007		551	280	0.663057	156	357	0.695906
AT1G09900	600	230	0.722892	342	542	0.613122		189	68	0.735409	184	186	0.502703
AT1G09910	1173	339	0.775794	677	747	0.524579		827	258	0.762212	181	298	0.622129
AT1G09920	249	87	0.741071	129	219	0.62931		604	249	0.708089	234	407	0.634945
AT1G09940	2132	954	0.690862	1154	2274	0.663361		1681	557	0.751117	1153	1895	0.621719
AT1G09950	395	299	0.569164	208	574	0.734015		42	24	0.636364	49	73	0.598361
AT1G09960	2080	643	0.763863	855	1291	0.601584		7539	3000	0.715343	2325	5215	0.691645
AT1G09970	1432	636	0.692456	1060	2019	0.655732		1213	415	0.745086	499	861	0.633088
AT1G09980	35	17	0.673077	15	24	0.615385		59	25	0.702381	31	50	0.617284
AT1G09995	13	2	0.866667	5	8	0.615385		56	7	0.888889	14	11	0.44
AT1G10020	13	3	0.8125	8	12	0.6		122	71	0.632124	42	92	0.686567
AT1G10030	12	4	0.75	15	12	0.444444		65	17	0.792683	24	26	0.52
AT1G10040	25	11	0.694444	21	20	0.487805		8	4	0.666667	9	5	0.357143
AT1G10050	98	34	0.742424	43	105	0.709459		111	49	0.69375	50	119	0.704142
AT1G10070	283	77	0.786111	266	425	0.615051		61	6	0.910448	25	26	0.509804
AT1G10090	611	150	0.802891	353	423	0.545103		751	235	0.761663	600	882	0.595142
AT1G10095	268	76	0.77907	94	157	0.625498		185	102	0.644599	72	193	0.728302
AT1G10100	0	8	0	0	13	1		0	15	0	0	16	1
AT1G10110	2	297	0.00668896	3	709	0.995787		31	491	0.059387	13	776	0.983523
AT1G10120	94	25	0.789916	25	80	0.761905		834	334	0.714041	281	604	0.682486
AT1G10130	278	279	0.499102	93	264	0.739496		593	274	0.683968	264	474	0.642276
AT1G10140	7	4	0.636364	6	15	0.714286		5	15	0.25	3	32	0.914286
AT1G10150	20	1	0.952381	4	20	0.833333		631	102	0.860846	382	420	0.523691
AT1G10160	55	7	0.887097	49	2	0.0392157		1174	10	0.991554	716	8	0.0110497
AT1G10170	1169	448	0.722944	760	1125	0.596817		888	372	0.704762	519	980	0.653769
AT1G10180	441	199	0.689063	316	553	0.636364		337	178	0.654369	166	360	0.684411
AT1G10200	86	106	0.447917	34	200	0.854701		563	598	0.484927	616	1900	0.755167
AT1G10210	120	71	0.628272	58	188	0.764228		49	27	0.644737	42	57	0.575758
AT1G10220	0	0	-	0	2	1		0	0	-	1	3	0.75
AT1G10240	46	17	0.730159	24	39	0.619048		38	26	0.59375	11	41	0.788462
AT1G10270	212	87	0.70903	139	275	0.664251		42	27	0.608696	42	87	0.674419
AT1G10290	538	163	0.767475	248	329	0.570191		1400	492	0.739958	551	777	0.58509
AT1G10300	6	0	1	3	4	0.571429		2	0	1	1	2	0.666667
AT1G10310	218	121	0.643068	150	428	0.740484		148	53	0.736318	46	88	0.656716
AT1G10320	419	163	0.719931	137	171	0.555195		384	131	0.745631	81	170	0.677291
AT1G10330	4	2	0.666667	4	3	0.428571		8	2	0.8	3	4	0.571429
AT1G10340	0	0	-	0	0	-		1	0	1	1	2	0.666667
AT1G10350	4	6	0.4	4	17	0.809524		5	3	0.625	12	24	0.666667
AT1G10390	487	197	0.711988	201	412	0.672104		831	475	0.636294	348	883	0.717303
AT1G10410	24	17	0.585366	23	42	0.646154		85	28	0.752212	51	94	0.648276
AT1G10417	0	0	-	1	0	0		0	1	0	0	2	1
AT1G10430	90	37	0.708661	61	92	0.601307		139	43	0.763736	70	91	0.565217
AT1G10450	64	36	0.64	35	56	0.615385		48	16	0.75	19	37	0.660714
AT1G10460	0	0	-	1	0	0		2	1	0.666667	1	1	0.5
AT1G10470	59	9	0.867647	11	11	0.5		199	48	0.805668	70	90	0.5625
AT1G10490	128	54	0.703297	80	135	0.627907		17	8	0.68	10	33	0.767442
AT1G10500	556	120	0.822485	337	519	0.606308		1739	526	0.76777	704	1133	0.616766
AT1G10510	119	38	0.757962	52	74	0.587302		193	58	0.768924	54	132	0.709677
AT1G10520	7	2	0.777778	2	9	0.818182		3	0	1	2	1	0.333333
AT1G10522	224	135	0.623955	152	345	0.694165		190	120	0.612903	217	459	0.678994
AT1G10530	34	6	0.85	24	23	0.489362		6	0	1	0	0	-
AT1G10540	6	0	1	0	0	-		90	26	0.775862	49	110	0.691824
AT1G10570	92	36	0.71875	36	74	0.672727		164	67	0.709957	37	106	0.741259
AT1G10580	107	36	0.748252	60	88	0.594595		65	25	0.722222	28	69	0.71134
AT1G10590	3546	1642	0.6835	2432	4883	0.667532		2588	1145	0.693276	1290	2680	0.675063
AT1G10600	489	182	0.728763	209	384	0.647555		627	318	0.663492	287	607	0.678971
AT1G10610	148	9	0.942675	36	11	0.234043		108	12	0.9	35	15	0.3
AT1G10630	201	56	0.782101	102	161	0.612167		880	368	0.705128	373	740	0.66487
AT1G10650	121	20	0.858156	26	43	0.623188		643	227	0.73908	302	602	0.665929
AT1G10670	1	1	0.5	2	1	0.333333		5	3	0.625	3	6	0.666667
AT1G10690	7	3	0.7	15	14	0.482759		2	3	0.4	0	12	1
AT1G10700	122	39	0.757764	63	118	0.651934		402	185	0.684838	187	339	0.644487
AT1G10720	84	26	0.763636	50	98	0.662162		362	157	0.697495	159	388	0.709324
AT1G10730	22	13	0.628571	11	30	0.731707		57	27	0.678571	25	48	0.657534
AT1G10740	38	3	0.926829	11	18	0.62069		363	55	0.868421	133	138	0.509225
AT1G10750	12	2	0.857143	2	2	0.5		23	4	0.851852	65	125	0.657895
AT1G10780	0	0	-	1	4	0.8		7	0	1	1	6	0.857143
AT1G10820	73	32	0.695238	23	53	0.697368		192	80	0.705882	74	113	0.604278
AT1G10830	0	0	-	2	1	0.333333		11	7	0.611111	7	5	0.416667
AT1G10865	81	29	0.736364	65	106	0.619883		92	31	0.747967	64	83	0.564626
AT1G10870	1	0	1	2	2	0.5		0	0	-	0	0	-
AT1G10890	22	6	0.785714	7	8	0.533333		58	20	0.74359	17	16	0.484848
AT1G10900	78	29	0.728972	56	80	0.588235		154	55	0.736842	75	146	0.660633
AT1G10910	48	31	0.607595	20	23	0.534884		26	13	0.666667	17	22	0.564103
AT1G10930	5	2	0.714286	7	8	0.533333		11	5	0.6875	7	2	0.222222
AT1G10940	159	18	0.898305	43	28	0.394366		553	61	0.900651	171	102	0.373626
AT1G10950	0	3	0	0	2	1		1	0	1	2	4	0.666667
AT1G10970	111	42	0.72549	56	116	0.674419		929	416	0.690706	328	785	0.705301
AT1G11000	4	2	0.666667	7	8	0.533333		6	6	0.5	7	19	0.730769
AT1G11020	129	53	0.708791	92	175	0.655431		113	58	0.660819	43	102	0.703448
AT1G11050	17	7	0.708333	8	27	0.771429		9	2	0.818182	3	4	0.571429
AT1G11060	53	46	0.535354	37	84	0.694215		133	33	0.801205	44	85	0.658915
AT1G11100	1	2	0.333333	0	3	1		11	2	0.846154	2	6	0.75
AT1G11120	1	2	0.333333	1	2	0.666667		5	7	0.416667	3	2	0.4
AT1G11125	1	2	0.333333	0	4	1		12	3	0.8	2	4	0.666667
AT1G11150	251	162	0.607748	134	332	0.712446		194	199	0.493639	110	431	0.796673
AT1G11170	170	39	0.813397	61	108	0.639053		7	9	0.4375	16	22	0.578947
AT1G11175	3279	1083	0.751719	2797	2911	0.509986		182	61	0.748971	115	199	0.633758
AT1G11180	98	121	0.447489	30	151	0.834254		162	75	0.683544	40	119	0.748428
AT1G11200	77	35	0.6875	94	104	0.525253		136	49	0.735135	79	143	0.644144
AT1G11240	97	32	0.751938	89	80	0.473373		48	3	0.941176	19	28	0.595745
AT1G11260	3983	1481	0.728953	2609	4928	0.653841		4044	2352	0.63227	2464	7115	0.742771
AT1G11270	3	1	0.75	2	1	0.333333		0	1	0	0	0	-
AT1G11280	150	78	0.657895	68	138	0.669903		149	54	0.73399	55	152	0.7343
AT1G11300	1	1	0.5	1	3	0.75		4	2	0.666667	0	0	-
AT1G11310	291	122	0.7046	136	222	0.620112		1350	859	0.611136	497	1478	0.748354
AT1G11320	161	75	0.682203	172	274	0.61435		122	56	0.685393	74	184	0.713178
AT1G11330	4	0	1	6	5	0.454545		0	0	-	7	18	0.72
AT1G11360	476	186	0.719033	358	609	0.629783		400	164	0.70922	162	290	0.641593
AT1G11370	38	46	0.452381	19	121	0.864286		0	0	-	2	18	0.9
AT1G11380	23	10	0.69697	11	25	0.694444		54	20	0.72973	46	61	0.570093
AT1G11390	1	0	1	1	1	0.5		3	0	1	0	2	1
AT1G11400	62	23	0.729412	52	71	0.577236		91	33	0.733871	28	76	0.730769
AT1G11410	32	10	0.761905	33	58	0.637363		87	36	0.707317	120	180	0.6
AT1G11420	3	1	0.75	1	3	0.75		0	0	-	0	0	-
AT1G11430	188	65	0.743083	106	190	0.641892		453	157	0.742623	201	341	0.629151
AT1G11440	68	15	0.819277	32	55	0.632184		169	73	0.698347	56	97	0.633987
AT1G11475	137	87	0.611607	148	319	0.683084		24	21	0.533333	42	104	0.712329
AT1G11480	404	204	0.664474	262	476	0.644986		487	156	0.757387	195	337	0.633459
AT1G11520	0	418	0	0	479	1		0	425	0	0	325	1
AT1G11530	257	159	0.617788	236	473	0.667137		163	50	0.765258	278	252	0.475472
AT1G11540	0	3	0	0	0	-		0	3	0	1	29	0.966667
AT1G11591	183	65	0.737903	101	207	0.672078		224	104	0.682927	83	137	0.622727
AT1G11592	247	66	0.789137	115	169	0.59507		311	106	0.745803	91	139	0.604348
AT1G11595	0	0	-	3	1	0.25		6	0	1	0	0	-
AT1G11630	40	13	0.754717	31	73	0.701923		79	32	0.711712	65	109	0.626437
AT1G11650	676	240	0.737991	422	694	0.621864		809	287	0.738139	354	601	0.629319
AT1G11660	107	59	0.644578	50	116	0.698795		574	204	0.737789	222	381	0.631841
AT1G11670	577	401	0.58998	147	680	0.822249		5524	2852	0.659503	2005	4838	0.707
AT1G11680	84	45	0.651163	35	87	0.713115		205	97	0.678808	94	170	0.643939
AT1G11700	9	4	0.692308	14	19	0.575758		38	0	1	32	5	0.135135
AT1G11710	43	14	0.754386	29	57	0.662791		19	12	0.612903	6	15	0.714286
AT1G11720	43	22	0.661538	16	42	0.724138		47	17	0.734375	5	13	0.722222
AT1G11750	60	24	0.714286	52	74	0.587302		154	65	0.703196	70	116	0.623656
AT1G11755	14	3	0.823529	14	19	0.575758		23	6	0.793103	8	11	0.578947
AT1G11760	66	28	0.702128	37	62	0.626263		43	22	0.661538	17	34	0.666667
AT1G11780	0	0	-	0	0	-		2	1	0.666667	0	1	1
AT1G11785	2	0	1	1	0	0		3	1	0.75	0	0	-
AT1G11820	1	0	1	0	0	-		0	0	-	0	0	-
AT1G11840	17811	8958	0.665359	12734	27975	0.687194		11057	4679	0.702656	4495	9759	0.68465
AT1G11860	4957	1270	0.796049	3962	4607	0.537636		5468	1314	0.806252	2311	2833	0.550739
AT1G11870	450	464	0.492341	269	962	0.781478		554	294	0.653302	236	744	0.759184
AT1G11880	118	163	0.419929	77	300	0.795756		189	169	0.527933	71	232	0.765677
AT1G11890	5	4	0.555556	0	10	1		28	16	0.636364	14	24	0.631579
AT1G11900	17	10	0.62963	12	35	0.744681		38	23	0.622951	12	26	0.684211
AT1G11905	29	8	0.783784	21	35	0.625		49	15	0.765625	13	34	0.723404
AT1G11910	3	2	0.6	0	5	1		10	3	0.769231	4	11	0.733333
AT1G11930	88	28	0.758621	73	111	0.603261		138	38	0.784091	36	91	0.716535
AT1G11950	12	6	0.666667	12	16	0.571429		4	0	1	1	2	0.666667
AT1G11960	35	7	0.833333	12	15	0.555556		30	9	0.769231	8	27	0.771429
AT1G12000	207	77	0.728873	110	251	0.695291		830	478	0.634557	484	1049	0.684279
AT1G12020	2	1	0.666667	26	16	0.380952		8	2	0.8	4	12	0.75
AT1G12030	0	0	-	10	12	0.545455		12	6	0.666667	0	0	-
AT1G12050	4	0	1	1	1	0.5		1	0	1	0	2	1
AT1G12060	109	41	0.726667	87	135	0.608108		103	38	0.730496	61	81	0.570423
AT1G12064	301	87	0.775773	116	183	0.61204		574	200	0.741602	453	843	0.650463
AT1G12090	4	0	1	0	0	-		8	12	0.4	32	27	0.457627
AT1G12110	532	219	0.708389	390	703	0.643184		48	19	0.716418	55	103	0.651899
AT1G12120	136	54	0.715789	75	168	0.691358		208	71	0.74552	144	212	0.595506
AT1G12130	8132	3617	0.692144	3369	12053	0.781546		5873	3725	0.611898	628	4269	0.871758
AT1G12140	49	25	0.662162	24	59	0.710843		93	34	0.732283	36	60	0.625
AT1G12150	0	0	-	0	0	-		1	0	1	1	0	0
AT1G12160	593	53	0.917957	430	111	0.205176		394	15	0.963325	189	6	0.0307692
AT1G12200	23	8	0.741935	22	44	0.666667		18	2	0.9	8	6	0.428571
AT1G12210	116	21	0.846715	81	65	0.445205		13	3	0.8125	7	3	0.3
AT1G12220	111	22	0.834586	66	62	0.484375		12	2	0.857143	10	11	0.52381
AT1G12230	23	12	0.657143	16	21	0.567568		39	23	0.629032	18	43	0.704918
AT1G12250	43	13	0.767857	24	44	0.647059		26	21	0.553191	15	78	0.83871
AT1G12270	33	11	0.75	10	27	0.72973		75	45	0.625	24	106	0.815385
AT1G12280	77	29	0.726415	33	50	0.60241		38	15	0.716981	10	33	0.767442
AT1G12290	76	51	0.598425	27	49	0.644737		20	13	0.606061	7	11	0.611111
AT1G12300	83	26	0.761468	53	95	0.641892		41	15	0.732143	17	39	0.696429
AT1G12320	46	17	0.730159	18	38	0.678571		81	26	0.757009	25	45	0.642857
AT1G12330	7	3	0.7	3	6	0.666667		1	4	0.2	0	0	-
AT1G12350	49	39	0.556818	24	91	0.791304		90	51	0.638298	22	84	0.792453
AT1G12360	171	85	0.667969	48	182	0.791304		285	125	0.695122	96	204	0.68
AT1G12370	146	104	0.584	108	210	0.660377		382	265	0.590417	117	270	0.697674
AT1G12390	104	31	0.77037	55	67	0.54918		117	25	0.823944	40	53	0.569892
AT1G12400	400	141	0.739372	243	536	0.688062		1021	268	0.792087	417	416	0.4994
AT1G12410	405	153	0.725806	220	395	0.642276		730	318	0.696565	242	522	0.683246
AT1G12420	0	0	-	0	0	-		6	0	1	3	6	0.666667
AT1G12430	52	33	0.611765	16	49	0.753846		63	33	0.65625	28	55	0.662651
AT1G12440	2199	770	0.740653	1620	2583	0.614561		4953	1456	0.772819	2312	3554	0.605864
AT1G12460	19	6	0.76	10	12	0.545455		32	2	0.941176	32	31	0.492063
AT1G12470	7	6	0.538462	9	21	0.7		43	14	0.754386	13	27	0.675
AT1G12520	287	105	0.732143	415	597	0.589921		113	37	0.753333	222	298	0.573077
AT1G12530	15	2	0.882353	9	4	0.307692		40	12	0.769231	20	27	0.574468
AT1G12550	3	3	0.5	4	8	0.666667		7	8	0.466667	3	13	0.8125
AT1G12580	23	3	0.884615	20	22	0.52381		45	14	0.762712	33	47	0.5875
AT1G12600	0	0	-	0	7	1		2	1	0.666667	2	4	0.666667
AT1G12620	20	3	0.869565	12	10	0.454545		38	5	0.883721	13	11	0.458333
AT1G12640	755	316	0.704949	277	694	0.714727		1670	338	0.831673	601	558	0.48145
AT1G12650	597	208	0.741615	443	602	0.576077		366	100	0.785408	179	203	0.531414
AT1G12680	262	94	0.735955	183	367	0.667273		376	180	0.676259	200	344	0.632353
AT1G12700	2	2	0.5	1	4	0.8		0	0	-	2	5	0.714286
AT1G12710	34	14	0.708333	13	35	0.729167		67	10	0.87013	43	103	0.705479
AT1G12730	24	26	0.48	14	15	0.517241		25	11	0.694444	20	17	0.459459
AT1G12750	190	132	0.590062	100	219	0.68652		246	82	0.75	130	253	0.660574
AT1G12760	768	411	0.651399	357	853	0.704959		1443	666	0.684211	705	1575	0.690789
AT1G12770	82	42	0.66129	47	113	0.70625		48	29	0.623377	58	79	0.576642
AT1G12775	4	3	0.571429	1	5	0.833333		2	2	0.5	1	5	0.833333
AT1G12780	1093	237	0.821805	407	750	0.648228		9041	2373	0.792097	3732	5031	0.574118
AT1G12800	239	58	0.804714	62	92	0.597403		1629	632	0.720478	520	981	0.653564
AT1G12810	496	234	0.679452	204	530	0.722071		2501	1053	0.703714	605	1135	0.652299
AT1G12840	465	170	0.732283	289	487	0.627577		1671	665	0.715325	591	1202	0.670385
AT1G12850	299	89	0.770619	151	315	0.675966		767	292	0.724268	336	665	0.664336
AT1G12860	262	96	0.731844	160	225	0.584416		104	49	0.679739	64	135	0.678392
AT1G12880	3	0	1	0	0	-		10	0	1	1	0	0
AT1G12900	17	1	0.944444	0	0	-		305	97	0.758706	213	383	0.642617
AT1G12930	39	31	0.557143	19	35	0.648148		66	24	0.733333	19	30	0.612245
AT1G12940	0	0	-	0	3	1		0	0	-	0	0	-
AT1G12970	340	139	0.709812	238	506	0.680108		352	115	0.753747	146	241	0.622739
AT1G12990	5	6	0.454545	4	16	0.8		33	14	0.702128	13	26	0.666667
AT1G13000	18	8	0.692308	4	18	0.818182		28	8	0.777778	17	19	0.527778
AT1G13020	20	11	0.645161	9	35	0.795455		86	42	0.671875	23	69	0.75
AT1G13030	24	10	0.705882	8	11	0.578947		4	5	0.444444	4	4	0.5
AT1G13040	17	6	0.73913	14	17	0.548387		12	0	1	7	9	0.5625
AT1G13050	30	15	0.666667	10	21	0.677419		4	2	0.666667	4	8	0.666667
AT1G13060	352	160	0.6875	182	410	0.692568		723	352	0.672558	218	549	0.715776
AT1G13080	109	5	0.95614	14	28	0.666667		2066	977	0.678935	618	1572	0.717808
AT1G13090	56	32	0.636364	43	85	0.664062		81	31	0.723214	29	57	0.662791
AT1G13120	38	16	0.703704	17	32	0.653061		65	14	0.822785	27	65	0.706522
AT1G13140	7	2	0.777778	6	12	0.666667		17	5	0.772727	4	4	0.5
AT1G13145	2	0	1	1	1	0.5		0	0	-	2	1	0.333333
AT1G13160	155	78	0.665236	84	191	0.694545		80	37	0.683761	54	112	0.674699
AT1G13170	10	2	0.833333	1	3	0.75		66	37	0.640777	28	48	0.631579
AT1G13180	1	0	1	2	0	0		4	1	0.8	2	0	0
AT1G13190	175	66	0.726141	118	172	0.593103		373	77	0.828889	185	205	0.525641
AT1G13195	19	12	0.612903	13	25	0.657895		23	5	0.821429	9	16	0.64
AT1G13210	250	152	0.621891	63	223	0.77972		508	297	0.631056	388	899	0.698524
AT1G13220	96	34	0.738462	51	138	0.730159		155	60	0.72093	61	128	0.677249
AT1G13245	201	86	0.700348	146	273	0.651551		207	62	0.769517	130	180	0.580645
AT1G13250	0	0	-	0	0	-		0	0	-	0	3	1
AT1G13270	101	30	0.770992	83	120	0.591133		227	88	0.720635	264	410	0.608309
AT1G13280	2280	492	0.822511	929	1253	0.574244		4556	1997	0.695254	2428	4899	0.668623
AT1G13320	52	22	0.702703	38	56	0.595745		133	49	0.730769	57	103	0.64375
AT1G13330	99	52	0.655629	88	148	0.627119		14	3	0.823529	3	9	0.75
AT1G13350	18	8	0.692308	8	12	0.6		19	10	0.655172	5	23	0.821429
AT1G13360	266	87	0.753541	268	240	0.472441		17	12	0.586207	11	29	0.725
AT1G13390	462	136	0.772575	332	453	0.57707		634	138	0.821244	245	343	0.583333
AT1G13410	183	58	0.759336	128	152	0.542857		12	3	0.8	69	76	0.524138
AT1G13440	4964	1884	0.724883	3421	5572	0.619593		7285	3289	0.688954	3135	5681	0.644397
AT1G13448	95	43	0.688406	41	92	0.691729		147	79	0.650442	35	95	0.730769
AT1G13450	476	184	0.721212	298	431	0.591221		640	226	0.73903	209	364	0.635253
AT1G13460	320	123	0.722348	252	374	0.597444		625	187	0.769704	268	370	0.579937
AT1G13520	5	0	1	0	0	-		18	1	0.947368	15	23	0.605263
AT1G13530	9	3	0.75	0	3	1		13	14	0.481481	4	20	0.833333
AT1G13540	34	13	0.723404	7	29	0.805556		182	127	0.588997	81	176	0.684825
AT1G13560	43	15	0.741379	26	52	0.666667		34	14	0.708333	15	24	0.615385
AT1G13570	73	48	0.603306	60	117	0.661017		148	57	0.721951	61	102	0.625767
AT1G13590	122	56	0.685393	154	247	0.61596		498	192	0.721739	210	339	0.617486
AT1G13600	0	0	-	0	0	-		11	5	0.6875	0	11	1
AT1G13630	9	6	0.6	3	4	0.571429		5	1	0.833333	6	8	0.571429
AT1G13640	6768	2967	0.695223	5317	9061	0.630199		1924	730	0.724943	1012	2177	0.682659
AT1G13690	187	104	0.642612	164	307	0.651805		123	60	0.672131	64	146	0.695238
AT1G13710	0	0	-	0	0	-		2	2	0.5	0	0	-
AT1G13740	278	111	0.714653	155	327	0.678423		100	33	0.75188	45	75	0.625
AT1G13780	95	23	0.805085	57	72	0.55814		142	23	0.860606	76	72	0.486486
AT1G13790	0	0	-	0	0	-		0	0	-	0	8	1
AT1G13800	6	3	0.666667	2	11	0.846154		0	0	-	2	4	0.666667
AT1G13810	11	11	0.5	7	35	0.833333		6	0	1	2	3	0.6
AT1G13820	62	21	0.746988	28	55	0.662651		6	3	0.666667	0	10	1
AT1G13860	10	1	0.909091	3	7	0.7		7	1	0.875	2	1	0.333333
AT1G13870	350	100	0.777778	218	394	0.643791		397	158	0.715315	242	360	0.598007
AT1G13880	256	99	0.721127	136	245	0.643045		599	210	0.74042	313	448	0.588699
AT1G13900	53	10	0.84127	25	41	0.621212		224	77	0.744186	85	112	0.568528
AT1G13910	12	3	0.8	0	8	1		9	0	1	2	3	0.6
AT1G13930	15	32	0.319149	10	63	0.863014		2	3	0.4	6	53	0.898305
AT1G13940	112	52	0.682927	79	135	0.630841		203	84	0.707317	102	191	0.651877
AT1G13950	2	0	1	2	1	0.333333		14	2	0.875	9	16	0.64
AT1G13960	52	23	0.693333	40	79	0.663866		45	6	0.882353	19	22	0.536585
AT1G13980	135	32	0.808383	70	102	0.593023		229	77	0.748366	105	183	0.635417
AT1G13990	125	46	0.730994	61	82	0.573427		292	76	0.793478	73	120	0.621762
AT1G14000	89	40	0.689922	51	74	0.592		404	152	0.726619	151	255	0.628079
AT1G14010	115	41	0.737179	38	108	0.739726		370	134	0.734127	143	295	0.673516
AT1G14020	65	22	0.747126	32	42	0.567568		326	128	0.718062	153	267	0.635714
AT1G14030	109	63	0.633721	52	159	0.753555		94	46	0.671429	57	214	0.789668
AT1G14040	30	33	0.47619	31	44	0.586667		2	2	0.5	44	56	0.56
AT1G14060	173	14	0.925134	189	62	0.247012		55	1	0.982143	51	26	0.337662
AT1G14090	22	5	0.814815	13	11	0.458333		9	7	0.5625	4	10	0.714286
AT1G14130	243	69	0.778846	78	237	0.752381		297	129	0.697183	79	133	0.627358
AT1G14140	33	14	0.702128	21	44	0.676923		56	22	0.717949	25	47	0.652778
AT1G14170	97	35	0.734848	63	117	0.65		24	13	0.648649	18	45	0.714286
AT1G14230	9	2	0.818182	6	13	0.684211		88	31	0.739496	34	70	0.673077
AT1G14270	23	7	0.766667	8	8	0.5		67	10	0.87013	24	29	0.54717
AT1G14290	0	0	-	0	3	1		24	16	0.6	11	46	0.807018
AT1G14310	16	4	0.8	7	11	0.611111		61	18	0.772152	11	30	0.731707
AT1G14320	2205	1016	0.68457	1462	2842	0.660316		1323	547	0.707487	877	1548	0.638351
AT1G14330	87	29	0.75	66	100	0.60241		290	98	0.747423	113	261	0.697861
AT1G14340	22	6	0.785714	10	11	0.52381		24	15	0.615385	6	29	0.828571
AT1G14360	62	27	0.696629	27	64	0.703297		454	161	0.738211	168	377	0.691743
AT1G14370	133	47	0.738889	29	76	0.72381		436	166	0.724252	142	271	0.656174
AT1G14380	72	30	0.705882	29	62	0.681319		92	28	0.766667	29	53	0.646341
AT1G14390	0	0	-	0	0	-		3	4	0.428571	3	12	0.8
AT1G14400	801	408	0.662531	447	931	0.675617		1004	418	0.706048	334	653	0.661601
AT1G14410	69	34	0.669903	34	72	0.679245		78	23	0.772277	57	84	0.595745
AT1G14430	2	1	0.666667	5	8	0.615385		16	0	1	18	26	0.590909
AT1G14450	111	43	0.720779	75	152	0.669604		505	219	0.697514	186	279	0.6
AT1G14510	35	14	0.714286	41	77	0.652542		70	40	0.636364	43	88	0.671756
AT1G14520	2902	1174	0.711973	1680	3026	0.643009		3739	1551	0.706805	1028	2179	0.679451
AT1G14530	177	58	0.753191	98	150	0.604839		51	22	0.69863	17	28	0.622222
AT1G14540	114	0	1	0	0	-		937	67	0.933267	775	560	0.419476
AT1G14560	85	26	0.765766	41	76	0.649573		216	96	0.692308	82	168	0.672
AT1G14570	770	302	0.718284	477	859	0.642964		1294	534	0.707877	420	977	0.699356
AT1G14580	86	12	0.877551	35	138	0.797688		199	35	0.850427	42	221	0.840304
AT1G14590	74	36	0.672727	59	131	0.689474		89	29	0.754237	54	68	0.557377
AT1G14610	529	228	0.698811	288	461	0.615487		439	174	0.71615	198	358	0.643885
AT1G14620	41	28	0.594203	32	99	0.755725		14	6	0.7	7	16	0.695652
AT1G14640	250	97	0.720461	42	78	0.65		171	55	0.756637	37	68	0.647619
AT1G14642	40	11	0.784314	7	22	0.758621		22	8	0.733333	3	10	0.769231
AT1G14650	2255	1027	0.687081	1148	2008	0.636248		1802	677	0.726906	746	1588	0.680377
AT1G14660	255	145	0.6375	94	295	0.758355		199	27	0.880531	66	79	0.544828
AT1G14670	785	263	0.749046	497	1080	0.684845		2864	1123	0.718335	1226	2555	0.675747
AT1G14680	0	0	-	4	4	0.5		0	0	-	0	0	-
AT1G14685	236	101	0.700297	177	274	0.607539		321	194	0.623301	243	512	0.678146
AT1G14690	607	257	0.702546	293	496	0.628644		1231	616	0.666486	485	1016	0.676882
AT1G14710	116	74	0.610526	51	107	0.677215		154	55	0.736842	63	140	0.689655
AT1G14720	11	2	0.846154	13	7	0.35		0	0	-	1	0	0
AT1G14740	1376	467	0.746609	1105	1665	0.601083		461	170	0.730586	193	342	0.639252
AT1G14760	423	127	0.769091	260	359	0.579968		14	4	0.777778	15	7	0.318182
AT1G14770	7	6	0.538462	11	25	0.694444		9	5	0.642857	8	14	0.636364
AT1G14780	0	0	-	0	0	-		7	4	0.636364	7	13	0.65
AT1G14790	0	0	-	0	0	-		0	0	-	5	0	0
AT1G14830	4	0	1	3	1	0.25		29	7	0.805556	22	27	0.55102
AT1G14840	12	4	0.75	7	13	0.65		24	11	0.685714	7	23	0.766667
AT1G14850	215	100	0.68254	121	265	0.686528		94	64	0.594937	49	82	0.625954
AT1G14860	277	93	0.748649	96	176	0.647059		959	313	0.753931	330	630	0.65625
AT1G14910	84	31	0.730435	46	63	0.577982		97	48	0.668966	47	72	0.605042
AT1G14920	797	324	0.710972	412	735	0.640802		1236	452	0.732227	702	1135	0.617855
AT1G14950	4413	2561	0.632779	1876	3805	0.669776		107	62	0.633136	85	234	0.733542
AT1G14960	346	53	0.867168	238	279	0.539652		11	3	0.785714	2	13	0.866667
AT1G14970	11	2	0.846154	4	5	0.555556		23	2	0.92	2	4	0.666667
AT1G14980	703	286	0.710819	528	1032	0.661538		531	229	0.698684	335	717	0.681559
AT1G15000	42	16	0.724138	20	39	0.661017		15	6	0.714286	9	21	0.7
AT1G15002	1	3	0.25	1	3	0.75		0	0	-	2	3	0.6
AT1G15010	58	0	1	1	2	0.666667		155	38	0.803109	60	110	0.647059
AT1G15020	209	117	0.641104	103	221	0.682099		225	95	0.703125	107	243	0.694286
AT1G15030	140	71	0.663507	82	123	0.6		337	143	0.702083	107	206	0.658147
AT1G15060	254	102	0.713483	139	178	0.561514		114	38	0.75	45	67	0.598214
AT1G15100	416	310	0.573003	195	616	0.759556		255	145	0.6375	169	420	0.713073
AT1G15110	3	3	0.5	1	3	0.75		4	8	0.333333	4	16	0.8
AT1G15130	68	14	0.829268	44	56	0.56		112	31	0.783217	45	69	0.605263
AT1G15160	0	0	-	0	2	1		10	2	0.833333	6	10	0.625
AT1G15165	31	12	0.72093	14	36	0.72		45	19	0.703125	25	60	0.705882
AT1G15170	1	2	0.333333	6	10	0.625		6	1	0.857143	2	3	0.6
AT1G15175	11	4	0.733333	7	13	0.65		16	2	0.888889	4	8	0.666667
AT1G15180	2716	741	0.785652	1835	2221	0.547584		558	139	0.800574	225	221	0.495516
AT1G15190	50	13	0.793651	35	51	0.593023		12	0	1	0	0	-
AT1G15200	296	177	0.625793	98	329	0.770492		201	119	0.628125	48	169	0.778802
AT1G15215	19	14	0.575758	16	24	0.6		8	7	0.533333	1	5	0.833333
AT1G15220	30	12	0.714286	16	33	0.673469		33	15	0.6875	12	29	0.707317
AT1G15230	8	2	0.8	18	16	0.470588		20	4	0.833333	7	17	0.708333
AT1G15240	329	135	0.709052	134	232	0.63388		382	167	0.695811	88	175	0.665399
AT1G15250	426	101	0.808349	314	395	0.557123		50	17	0.746269	59	62	0.512397
AT1G15270	104	57	0.645963	52	207	0.799228		408	172	0.703448	206	492	0.704871
AT1G15280	471	156	0.751196	196	311	0.613412		519	152	0.773472	172	301	0.636364
AT1G15290	19	2	0.904762	9	8	0.470588		48	25	0.657534	45	115	0.71875
AT1G15300	177	46	0.793722	129	156	0.547368		227	59	0.793706	77	63	0.45
AT1G15310	42	12	0.777778	26	46	0.638889		33	8	0.804878	9	14	0.608696
AT1G15330	125	51	0.710227	115	193	0.626623		3	3	0.5	2	5	0.714286
AT1G15340	272	91	0.749311	153	262	0.631325		202	73	0.734545	64	143	0.690821
AT1G15350	146	56	0.722772	112	170	0.602837		208	86	0.707483	104	195	0.652174
AT1G15370	6	3	0.666667	5	10	0.666667		13	5	0.722222	2	8	0.8
AT1G15380	12	6	0.666667	40	34	0.459459		0	0	-	1	2	0.666667
AT1G15390	322	140	0.69697	292	440	0.601093		333	137	0.708511	191	410	0.682196
AT1G15400	128	17	0.882759	70	58	0.453125		185	27	0.872642	103	92	0.471795
AT1G15410	87	8	0.915789	29	21	0.42		310	106	0.745192	126	242	0.657609
AT1G15420	88	42	0.676923	54	105	0.660377		22	17	0.564103	18	31	0.632653
AT1G15430	104	44	0.702703	79	186	0.701887		201	65	0.755639	84	116	0.58
AT1G15440	366	174	0.677778	259	534	0.673392		51	24	0.68	24	66	0.733333
AT1G15470	63	10	0.863014	31	39	0.557143		99	39	0.717391	38	73	0.657658
AT1G15480	47	21	0.691176	52	71	0.577236		1	2	0.333333	5	8	0.615385
AT1G15490	49	24	0.671233	15	45	0.75		132	68	0.66	67	135	0.668317
AT1G15500	3407	1524	0.690935	2154	3732	0.634047		2451	959	0.718768	2740	5203	0.655042
AT1G15510	42	28	0.6	39	67	0.632075		16	4	0.8	28	43	0.605634
AT1G15520	0	0	-	0	0	-		3	1	0.75	1	5	0.833333
AT1G15530	54	16	0.771429	24	51	0.68		49	20	0.710145	45	53	0.540816
AT1G15570	0	0	-	0	0	-		0	0	-	0	6	1
AT1G15660	180	56	0.762712	83	146	0.637555		502	135	0.788069	243	380	0.609952
AT1G15670	690	136	0.835351	387	368	0.487417		1318	262	0.834177	628	844	0.57337
AT1G15690	3582	1155	0.756175	2122	3572	0.627327		14426	5155	0.736735	9009	15012	0.624953
AT1G15710	241	106	0.694524	201	359	0.641071		403	143	0.738095	227	365	0.616554
AT1G15720	244	73	0.769716	223	182	0.449383		171	61	0.737069	138	96	0.410256
AT1G15730	146	42	0.776596	69	103	0.598837		174	36	0.828571	88	63	0.417219
AT1G15740	661	226	0.745209	315	511	0.618644		622	215	0.74313	130	234	0.642857
AT1G15750	822	282	0.744565	351	676	0.658228		1205	351	0.774422	362	424	0.53944
AT1G15780	214	76	0.737931	99	198	0.666667		395	144	0.732839	114	255	0.691057
AT1G15790	20	7	0.740741	13	7	0.35		14	0	1	13	6	0.315789
AT1G15800	46	17	0.730159	17	32	0.653061		90	32	0.737705	63	104	0.622754
AT1G15810	218	75	0.744027	117	204	0.635514		263	91	0.742938	118	183	0.607973
AT1G15830	0	1	0	0	0	-		9	2	0.818182	7	3	0.3
AT1G15840	34	32	0.515152	37	63	0.63		15	19	0.441176	18	56	0.756757
AT1G15860	90	42	0.681818	50	86	0.632353		377	121	0.757028	146	262	0.642157
AT1G15870	7	3	0.7	6	5	0.454545		0	0	-	0	5	1
AT1G15880	1389	233	0.85635	817	765	0.483565		1927	477	0.801581	828	1062	0.561905
AT1G15900	29	4	0.878788	38	18	0.321429		25	9	0.735294	10	15	0.6
AT1G15920	222	88	0.716129	182	385	0.679012		297	100	0.748111	181	250	0.580046
AT1G15930	1105	597	0.649236	717	1589	0.689072		504	273	0.648649	418	946	0.693548
AT1G15940	148	54	0.732673	123	163	0.56993		95	32	0.748031	44	79	0.642276
AT1G15950	613	192	0.761491	387	629	0.619094		2348	550	0.810214	922	1234	0.572356
AT1G15970	3	1	0.75	1	4	0.8		27	11	0.710526	14	19	0.575758
AT1G16000	143	31	0.821839	138	92	0.4		144	59	0.70936	125	176	0.584718
AT1G16010	3	1	0.75	2	3	0.6		5	0	1	2	3	0.6
AT1G16020	37	14	0.72549	20	38	0.655172		59	24	0.710843	23	46	0.666667
AT1G16030	233	65	0.781879	164	202	0.551913		18	9	0.666667	7	12	0.631579
AT1G16040	84	26	0.763636	42	62	0.596154		86	26	0.767857	25	36	0.590164
AT1G16060	11	0	1	2	4	0.666667		18	6	0.75	4	9	0.692308
AT1G16080	22	11	0.666667	11	31	0.738095		46	19	0.707692	26	49	0.653333
AT1G16090	10	0	1	3	1	0.25		3	1	0.75	1	2	0.666667
AT1G16150	0	0	-	0	0	-		2	1	0.666667	1	4	0.8
AT1G16170	27	7	0.794118	8	14	0.636364		177	45	0.797297	32	83	0.721739
AT1G16180	1	0	1	2	2	0.5		22	8	0.733333	8	13	0.619048
AT1G16190	124	26	0.826667	38	57	0.6		161	60	0.728507	68	99	0.592814
AT1G16210	338	129	0.723769	233	464	0.66571		520	200	0.722222	234	416	0.64
AT1G16240	4	2	0.666667	2	2	0.5		14	1	0.933333	7	10	0.588235
AT1G16250	84	42	0.666667	38	89	0.700787		97	49	0.664384	41	78	0.655462
AT1G16270	156	65	0.705882	70	133	0.655172		219	76	0.742373	103	142	0.579592
AT1G16280	128	44	0.744186	72	139	0.658768		76	18	0.808511	39	45	0.535714
AT1G16300	133	156	0.460208	84	276	0.766667		130	75	0.634146	37	99	0.727941
AT1G16320	0	0	-	0	1	1		0	0	-	0	1	1
AT1G16330	0	2	0	0	3	1		0	0	-	0	7	1
AT1G16340	1	0	1	0	0	-		0	0	-	0	0	-
AT1G16350	308	163	0.653928	242	446	0.648256		45	24	0.652174	58	96	0.623377
AT1G16445	11	9	0.55	13	18	0.580645		1	2	0.333333	5	11	0.6875
AT1G16460	342	97	0.779043	157	149	0.486928		282	62	0.819767	147	101	0.407258
AT1G16480	6	4	0.6	5	7	0.583333		0	0	-	0	0	-
AT1G16500	30	8	0.789474	21	15	0.416667		208	70	0.748201	75	152	0.669604
AT1G16515	26	2	0.928571	15	10	0.4		13	6	0.684211	10	8	0.444444
AT1G16520	14	7	0.666667	13	17	0.566667		22	8	0.733333	25	33	0.568966
AT1G16540	215	80	0.728814	72	102	0.586207		303	117	0.721429	86	135	0.61086
AT1G16550	318	479	0.398996	220	1345	0.859425		165	189	0.466102	70	403	0.852008
AT1G16560	1517	797	0.655575	847	1865	0.687684		1976	747	0.72567	960	1809	0.653304
AT1G16570	117	59	0.664773	53	110	0.674847		233	70	0.768977	110	133	0.547325
AT1G16590	360	157	0.696325	217	440	0.669711		237	143	0.623684	84	315	0.789474
AT1G16610	1286	467	0.7336	604	960	0.613811		1071	490	0.686099	579	1052	0.645003
AT1G16650	56	23	0.708861	21	42	0.666667		67	24	0.736264	25	56	0.691358
AT1G16670	20	13	0.606061	10	26	0.722222		95	29	0.766129	36	62	0.632653
AT1G16680	19	4	0.826087	12	22	0.647059		14	9	0.608696	7	14	0.666667
AT1G16690	24	10	0.705882	3	15	0.833333		14	8	0.636364	8	14	0.636364
AT1G16710	18	12	0.6	4	19	0.826087		49	20	0.710145	13	28	0.682927
AT1G16720	34	11	0.755556	16	38	0.703704		61	44	0.580952	22	43	0.661538
AT1G16730	5905	1306	0.818888	3259	3048	0.483273		62	17	0.78481	34	83	0.709402
AT1G16740	75	12	0.862069	59	82	0.58156		53	10	0.84127	15	26	0.634146
AT1G16750	7	0	1	2	1	0.333333		66	25	0.725275	56	58	0.508772
AT1G16770	45	55	0.45	64	191	0.74902		5	3	0.625	1	2	0.666667
AT1G16780	33	24	0.578947	20	34	0.62963		44	35	0.556962	41	61	0.598039
AT1G16790	145	91	0.614407	97	211	0.685065		176	107	0.621908	110	286	0.722222
AT1G16800	135	76	0.63981	50	118	0.702381		88	53	0.624113	68	99	0.592814
AT1G16810	1155	295	0.796552	811	927	0.533372		1672	535	0.757589	926	1346	0.59243
AT1G16825	18	10	0.642857	10	17	0.62963		89	12	0.881188	25	34	0.576271
AT1G16830	15	12	0.555556	16	15	0.483871		0	0	-	3	3	0.5
AT1G16840	3188	1379	0.698051	1363	2438	0.64141		5271	1858	0.739374	1580	2994	0.654569
AT1G16850	2421	715	0.772003	1450	1655	0.533011		7	4	0.636364	29	54	0.650602
AT1G16860	53	13	0.80303	21	27	0.5625		66	19	0.776471	27	43	0.614286
AT1G16870	111	49	0.69375	51	128	0.715084		138	46	0.75	59	108	0.646707
AT1G16880	5	0	1	0	0	-		70	69	0.503597	48	192	0.8
AT1G16900	494	182	0.730769	331	520	0.611046		984	343	0.741522	444	605	0.57674
AT1G16916	0	0	-	0	0	-		0	1	0	0	0	-
AT1G16920	427	76	0.848907	330	282	0.460784		391	197	0.664966	102	241	0.702624
AT1G16930	167	114	0.594306	94	404	0.811245		172	111	0.607774	100	217	0.684543
AT1G16970	46	18	0.71875	26	65	0.714286		45	25	0.642857	24	63	0.724138
AT1G17010	357	153	0.7	279	555	0.665468		328	130	0.716157	139	234	0.627346
AT1G17020	2240	537	0.806626	676	1406	0.675312		10215	3546	0.742315	3831	7465	0.660853
AT1G17040	36	11	0.765957	14	26	0.65		30	11	0.731707	13	12	0.48
AT1G17050	50	9	0.847458	25	31	0.553571		82	17	0.828283	14	27	0.658537
AT1G17060	131	33	0.79878	65	66	0.503817		192	72	0.727273	93	189	0.670213
AT1G17070	295	133	0.689252	235	481	0.671788		487	156	0.757387	174	390	0.691489
AT1G17080	33	17	0.66	23	47	0.671429		57	23	0.7125	29	46	0.613333
AT1G17110	232	62	0.789116	130	171	0.568106		401	118	0.77264	148	234	0.612565
AT1G17120	160	79	0.669456	128	271	0.679198		727	201	0.783405	313	440	0.584329
AT1G17130	1356	445	0.752915	813	1109	0.577003		1777	766	0.698781	724	1729	0.704851
AT1G17140	0	0	-	0	0	-		4	8	0.333333	6	9	0.6
AT1G17145	1364	439	0.756517	783	1190	0.603142		1004	282	0.780715	300	498	0.62406
AT1G17147	48	16	0.75	37	74	0.666667		4	4	0.5	8	13	0.619048
AT1G17160	670	252	0.726681	467	895	0.657122		1019	425	0.705679	341	801	0.701401
AT1G17170	77	1	0.987179	34	4	0.105263		341	34	0.909333	83	164	0.663968
AT1G17190	44	166	0.209524	7	409	0.983173		173	702	0.197714	215	1651	0.88478
AT1G17200	4	2	0.666667	3	2	0.4		20	3	0.869565	81	36	0.307692
AT1G17210	2747	643	0.810324	1761	1696	0.490599		2235	607	0.786418	1081	1344	0.554227
AT1G17220	437	194	0.692552	165	439	0.726821		1358	632	0.682412	621	1375	0.688878
AT1G17230	14	4	0.777778	13	7	0.35		341	100	0.773243	162	273	0.627586
AT1G17270	61	24	0.717647	42	47	0.52809		90	17	0.841121	31	45	0.592105
AT1G17280	2	2	0.5	0	0	-		3	1	0.75	3	1	0.25
AT1G17290	3018	1070	0.738258	1856	2928	0.61204		9594	4122	0.699475	3556	8037	0.693263
AT1G17330	132	15	0.897959	76	32	0.296296		123	3	0.97619	64	13	0.168831
AT1G17340	67	35	0.656863	27	71	0.72449		104	40	0.722222	44	133	0.751412
AT1G17345	451	739	0.378992	118	2143	0.947811		1182	285	0.805726	1372	4076	0.748164
AT1G17350	380	184	0.673759	229	537	0.701044		314	252	0.55477	157	335	0.680894
AT1G17360	27	55	0.329268	12	99	0.891892		189	87	0.684783	41	150	0.78534
AT1G17370	65	20	0.764706	20	26	0.565217		54	17	0.760563	29	48	0.623377
AT1G17410	16	11	0.592593	7	7	0.5		25	4	0.862069	4	12	0.75
AT1G17420	21	7	0.75	2	3	0.6		21	26	0.446809	30	65	0.684211
AT1G17430	128	48	0.727273	64	95	0.597484		41	10	0.803922	24	14	0.368421
AT1G17440	859	285	0.750874	491	581	0.541978		1089	321	0.77234	408	550	0.574113
AT1G17450	240	99	0.707965	80	189	0.702602		168	63	0.727273	55	116	0.678363
AT1G17455	0	0	-	1	11	0.916667		6	5	0.545455	7	27	0.794118
AT1G17460	222	90	0.711538	118	219	0.649852		176	85	0.67433	122	247	0.669377
AT1G17470	461	209	0.68806	265	545	0.67284		252	95	0.726225	131	251	0.657068
AT1G17490	13	3	0.8125	16	19	0.542857		46	16	0.741935	14	21	0.6
AT1G17500	73	9	0.890244	34	39	0.534247		796	347	0.696413	349	870	0.7137
AT1G17510	5	1	0.833333	9	4	0.307692		8	0	1	1	3	0.75
AT1G17520	157	57	0.733645	74	144	0.66055		103	47	0.686667	27	73	0.73
AT1G17550	473	156	0.751987	226	448	0.664688		746	314	0.703774	203	467	0.697015
AT1G17560	0	0	-	0	0	-		0	0	-	2	8	0.8
AT1G17580	15	2	0.882353	9	6	0.4		21	10	0.677419	9	18	0.666667
AT1G17590	60	10	0.857143	44	27	0.380282		22	6	0.785714	2	6	0.75
AT1G17620	1110	434	0.718912	833	1343	0.617188		1590	578	0.733395	893	1491	0.625419
AT1G17630	5	5	0.5	4	9	0.692308		0	0	-	6	9	0.6
AT1G17640	51	30	0.62963	35	63	0.642857		40	8	0.833333	16	26	0.619048
AT1G17650	30	6	0.833333	3	11	0.785714		41	27	0.602941	32	62	0.659574
AT1G17665	22	11	0.666667	16	33	0.673469		0	0	-	13	43	0.767857
AT1G17680	182	97	0.65233	111	166	0.599278		209	79	0.725694	77	171	0.689516
AT1G17690	63	28	0.692308	29	54	0.650602		88	12	0.88	35	38	0.520548
AT1G17720	197	53	0.788	84	147	0.636364		614	169	0.784163	286	487	0.630013
AT1G17730	60	25	0.705882	19	58	0.753247		176	78	0.692913	70	144	0.672897
AT1G17760	1103	352	0.758076	544	852	0.610315		551	307	0.642191	252	590	0.700713
AT1G17780	376	156	0.706767	231	299	0.564151		401	130	0.755179	123	164	0.571429
AT1G17790	181	63	0.741803	123	161	0.566901		187	73	0.719231	67	122	0.645503
AT1G17810	5650	2418	0.700297	3327	5837	0.636949		5	3	0.625	20	32	0.615385
AT1G17830	77	51	0.601562	35	134	0.792899		54	35	0.606742	22	38	0.633333
AT1G17840	496	397	0.555431	756	2158	0.740563		2704	1577	0.631628	1542	3701	0.705894
AT1G17850	104	55	0.654088	47	108	0.696774		67	52	0.563025	57	99	0.634615
AT1G17860	3832	3625	0.51388	3211	12337	0.793478		8183	3192	0.719385	4293	10898	0.717398
AT1G17870	121	56	0.683616	55	102	0.649682		56	13	0.811594	15	18	0.545455
AT1G17880	5543	2191	0.716705	3582	6179	0.633029		4410	1855	0.703911	2802	4815	0.632139
AT1G17890	1456	536	0.730924	752	1632	0.684564		6587	2191	0.750399	2744	4885	0.64032
AT1G17920	33	26	0.559322	13	37	0.74		36	17	0.679245	17	49	0.742424
AT1G17930	174	79	0.687747	141	242	0.631854		326	85	0.793187	101	248	0.710602
AT1G17940	38	17	0.690909	24	51	0.68		12	8	0.6	17	25	0.595238
AT1G17970	6	2	0.75	2	4	0.666667		21	10	0.677419	3	8	0.727273
AT1G17980	38	20	0.655172	33	42	0.56		118	55	0.682081	40	69	0.633028
AT1G18030	17	5	0.772727	11	14	0.56		68	38	0.641509	20	22	0.52381
AT1G18060	9	8	0.529412	11	26	0.702703		12	3	0.8	9	4	0.307692
AT1G18070	110	55	0.666667	74	144	0.66055		162	69	0.701299	76	140	0.648148
AT1G18090	13	1	0.928571	7	7	0.5		39	21	0.65	8	24	0.75
AT1G18100	367	117	0.758264	230	354	0.606164		3	1	0.75	4	12	0.75
AT1G18140	1	2	0.333333	3	20	0.869565		0	0	-	0	0	-
AT1G18150	172	45	0.792627	87	234	0.728972		370	148	0.714286	143	370	0.721248
AT1G18160	318	95	0.769976	98	212	0.683871		261	89	0.745714	86	166	0.65873
AT1G18170	87	38	0.696	59	75	0.559701		129	7	0.948529	38	73	0.657658
AT1G18180	0	0	-	0	0	-		8	8	0.5	6	24	0.8
AT1G18190	84	31	0.730435	37	55	0.597826		245	52	0.824916	87	151	0.634454
AT1G18250	0	0	-	2	3	0.6		10	38	0.208333	10	21	0.677419
AT1G18260	1546	682	0.693896	849	1883	0.689239		1905	650	0.745597	527	1277	0.707871
AT1G18265	8	0	1	4	6	0.6		2	3	0.4	17	15	0.46875
AT1G18270	51	25	0.671053	34	69	0.669903		122	74	0.622449	31	138	0.816568
AT1G18290	2	1	0.666667	2	2	0.5		23	17	0.575	30	77	0.719626
AT1G18300	1452	541	0.72855	1235	2239	0.644502		1785	601	0.748114	925	1675	0.644231
AT1G18310	0	131	0	0	289	1		0	28	0	0	26	1
AT1G18330	1	2	0.333333	2	2	0.5		6	2	0.75	0	0	-
AT1G18335	78	24	0.764706	41	70	0.630631		91	29	0.758333	18	24	0.571429
AT1G18340	20	16	0.555556	17	51	0.75		50	36	0.581395	16	56	0.777778
AT1G18360	32	16	0.666667	12	58	0.828571		13	15	0.464286	10	34	0.772727
AT1G18390	11	3	0.785714	14	15	0.517241		19	6	0.76	19	25	0.568182
AT1G18415	0	0	-	0	0	-		0	0	-	3	3	0.5
AT1G18440	37	10	0.787234	9	17	0.653846		83	26	0.761468	47	51	0.520408
AT1G18450	694	317	0.686449	472	627	0.570519		393	139	0.738722	147	310	0.678337
AT1G18460	284	239	0.543021	120	434	0.783394		175	46	0.791855	40	36	0.473684
AT1G18470	124	47	0.725146	47	108	0.696774		150	50	0.75	57	111	0.660714
AT1G18480	59	21	0.7375	32	59	0.648352		161	58	0.73516	99	161	0.619231
AT1G18485	0	0	-	7	4	0.363636		12	2	0.857143	7	14	0.666667
AT1G18500	289	134	0.683215	214	420	0.662461		117	74	0.612565	59	154	0.723005
AT1G18540	3814	1720	0.689194	2946	5581	0.654509		3315	1490	0.689906	2628	4979	0.654529
AT1G18550	13	5	0.722222	1	7	0.875		23	9	0.71875	11	27	0.710526
AT1G18560	24	4	0.857143	12	23	0.657143		74	20	0.787234	25	31	0.553571
AT1G18570	3	0	1	5	7	0.583333		15	3	0.833333	41	53	0.56383
AT1G18580	66	18	0.785714	53	83	0.610294		113	49	0.697531	66	116	0.637363
AT1G18600	0	0	-	0	0	-		6	2	0.75	4	10	0.714286
AT1G18650	3	0	1	0	3	1		10	14	0.416667	12	19	0.612903
AT1G18660	24	9	0.727273	7	8	0.533333		55	24	0.696203	28	34	0.548387
AT1G18670	17	13	0.566667	18	28	0.608696		48	18	0.727273	7	8	0.533333
AT1G18680	9	5	0.642857	9	14	0.608696		48	22	0.685714	22	47	0.681159
AT1G18690	20	14	0.588235	11	12	0.521739		21	11	0.65625	8	13	0.619048
AT1G18700	33	25	0.568966	26	43	0.623188		54	26	0.675	20	36	0.642857
AT1G18720	1546	541	0.740776	1064	2205	0.674518		4655	1973	0.702323	1978	4001	0.669175
AT1G18740	232	74	0.75817	193	418	0.684124		158	60	0.724771	71	171	0.706612
AT1G18745	65	13	0.833333	58	85	0.594406		49	12	0.803279	30	44	0.594595
AT1G18750	105	36	0.744681	30	83	0.734513		16	8	0.666667	1	2	0.666667
AT1G18773	8	10	0.444444	2	33	0.942857		3	18	0.142857	5	37	0.880952
AT1G18800	32	14	0.695652	28	63	0.692308		15	3	0.833333	7	18	0.72
AT1G18840	149	50	0.748744	78	181	0.698842		44	14	0.758621	20	35	0.636364
AT1G18850	6	4	0.6	0	6	1		0	0	-	1	2	0.666667
AT1G18890	130	80	0.619048	80	122	0.60396		154	57	0.729858	91	167	0.647287
AT1G18900	1496	681	0.687184	894	1724	0.658518		367	178	0.673394	198	448	0.693498
AT1G18940	122	61	0.666667	123	247	0.667568		26	9	0.742857	10	9	0.473684
AT1G18950	136	45	0.751381	71	140	0.663507		211	101	0.676282	85	162	0.65587
AT1G19000	161	55	0.74537	91	150	0.622407		372	98	0.791489	143	217	0.602778
AT1G19010	26	3	0.896552	13	28	0.682927		180	20	0.9	105	63	0.375
AT1G19020	0	0	-	0	0	-		3	6	0.333333	4	28	0.875
AT1G19025	51	7	0.87931	25	41	0.621212		36	15	0.705882	15	31	0.673913
AT1G19080	29	12	0.707317	19	33	0.634615		58	20	0.74359	6	13	0.684211
AT1G19090	0	3	0	0	19	1		0	0	-	0	4	1
AT1G19100	46	19	0.707692	18	31	0.632653		44	13	0.77193	15	29	0.659091
AT1G19110	144	59	0.70936	61	124	0.67027		151	42	0.782383	44	93	0.678832
AT1G19120	133	34	0.796407	99	107	0.519417		223	72	0.755932	89	191	0.682143
AT1G19130	159	73	0.685345	77	139	0.643519		106	33	0.76259	27	63	0.7
AT1G19140	202	82	0.711268	158	251	0.613692		146	60	0.708738	41	89	0.684615
AT1G19170	228	116	0.662791	132	274	0.674877		134	52	0.72043	62	137	0.688442
AT1G19180	680	229	0.748075	268	494	0.648294		1461	494	0.747315	1546	3580	0.6984
AT1G19190	5	3	0.625	1	6	0.857143		3	0	1	0	0	-
AT1G19210	195	55	0.78	148	152	0.506667		153	51	0.75	15	18	0.545455
AT1G19220	38	1	0.974359	17	19	0.527778		53	19	0.736111	40	55	0.578947
AT1G19230	213	74	0.74216	182	229	0.557178		162	7	0.95858	133	36	0.213018
AT1G19240	243	94	0.721068	166	235	0.586035		83	37	0.691667	62	111	0.641618
AT1G19270	1	0	1	0	0	-		3	2	0.6	6	4	0.4
AT1G19290	87	35	0.713115	67	129	0.658163		42	16	0.724138	16	54	0.771429
AT1G19300	4	0	1	4	8	0.666667		5	1	0.833333	5	9	0.642857
AT1G19310	60	38	0.612245	52	109	0.677019		115	35	0.766667	43	81	0.653226
AT1G19340	31	20	0.607843	20	53	0.726027		12	9	0.571429	0	0	-
AT1G19350	5	3	0.625	6	3	0.333333		13	4	0.764706	6	7	0.538462
AT1G19360	155	46	0.771144	98	174	0.639706		269	121	0.689744	142	330	0.699153
AT1G19370	130	69	0.653266	130	265	0.670886		34	18	0.653846	116	230	0.66474
AT1G19380	126	41	0.754491	53	114	0.682635		929	330	0.737887	488	1104	0.693467
AT1G19394	140	82	0.630631	52	103	0.664516		112	57	0.662722	22	51	0.69863
AT1G19396	344	409	0.456839	112	494	0.815182		374	224	0.625418	57	215	0.790441
AT1G19400	1451	408	0.780527	1076	1335	0.553712		575	217	0.72601	385	685	0.640187
AT1G19430	262	128	0.671795	144	265	0.647922		599	184	0.765006	193	454	0.7017
AT1G19440	0	0	-	2	1	0.333333		2	1	0.666667	4	10	0.714286
AT1G19480	7	3	0.7	1	4	0.8		4	2	0.666667	1	3	0.75
AT1G19485	0	0	-	0	0	-		0	0	-	1	0	0
AT1G19490	747	325	0.696828	561	996	0.639692		147	54	0.731343	40	55	0.578947
AT1G19520	0	0	-	1	5	0.833333		0	0	-	0	0	-
AT1G19530	711	927	0.434066	375	2209	0.854876		83	78	0.515528	128	480	0.789474
AT1G19540	732	184	0.799127	634	638	0.501572		212	52	0.80303	117	130	0.526316
AT1G19570	706	349	0.669194	501	1064	0.679872		220	57	0.794224	147	211	0.589385
AT1G19580	85	27	0.758929	63	95	0.601266		160	67	0.704846	111	124	0.52766
AT1G19600	249	102	0.709402	171	302	0.638478		147	53	0.735	145	203	0.583333
AT1G19650	85	42	0.669291	35	65	0.65		136	51	0.727273	29	45	0.608108
AT1G19660	762	369	0.67374	372	815	0.686605		986	348	0.73913	270	442	0.620787
AT1G19680	764	244	0.757937	420	516	0.551282		416	102	0.803089	199	355	0.640794
AT1G19690	68	58	0.539683	25	98	0.796748		71	44	0.617391	21	60	0.740741
AT1G19700	53	20	0.726027	34	38	0.527778		311	81	0.793367	121	204	0.627692
AT1G19710	5	5	0.5	6	9	0.6		78	22	0.78	24	73	0.752577
AT1G19715	46	17	0.730159	8	20	0.714286		261	97	0.72905	83	181	0.685606
AT1G19720	10	6	0.625	6	3	0.333333		78	24	0.764706	38	80	0.677966
AT1G19730	141	60	0.701493	132	164	0.554054		150	47	0.761421	72	83	0.535484
AT1G19740	57	16	0.780822	53	81	0.604478		98	25	0.796748	41	60	0.594059
AT1G19750	29	18	0.617021	14	14	0.5		14	3	0.823529	7	8	0.533333
AT1G19770	175	74	0.702811	149	280	0.652681		204	62	0.766917	160	347	0.684418
AT1G19800	176	100	0.637681	124	275	0.689223		213	202	0.513253	153	339	0.689024
AT1G19835	56	20	0.736842	23	40	0.634921		133	39	0.773256	84	145	0.633188
AT1G19850	2	1	0.666667	0	0	-		15	7	0.681818	3	7	0.7
AT1G19860	6	4	0.6	4	11	0.733333		15	6	0.714286	11	11	0.5
AT1G19870	87	42	0.674419	40	84	0.677419		70	28	0.714286	31	62	0.666667
AT1G19910	1316	230	0.851229	825	676	0.450366		2396	525	0.820267	966	955	0.497137
AT1G19920	44	15	0.745763	27	73	0.73		181	49	0.786957	75	164	0.686192
AT1G19980	10	3	0.769231	10	25	0.714286		27	12	0.692308	15	24	0.615385
AT1G19990	39	28	0.58209	14	97	0.873874		86	76	0.530864	51	200	0.796813
AT1G20010	112	25	0.817518	30	46	0.605263		503	244	0.67336	421	713	0.628748
AT1G20030	25	3	0.892857	20	19	0.487179		29	0	1	1	2	0.666667
AT1G20050	1618	542	0.749074	1129	1498	0.570232		2239	842	0.726712	1157	1819	0.611223
AT1G20060	0	0	-	0	0	-		7	4	0.636364	0	0	-
AT1G20090	54	23	0.701299	40	71	0.63964		446	171	0.722853	216	364	0.627586
AT1G20100	1161	429	0.730189	738	1249	0.628586		1393	550	0.716933	519	1175	0.693625
AT1G20110	3347	1450	0.697728	1709	3817	0.690735		8490	3707	0.696073	2939	6397	0.685197
AT1G20140	89	57	0.609589	84	146	0.634783		33	28	0.540984	37	92	0.713178
AT1G20200	1301	591	0.687632	956	1885	0.663499		3448	1350	0.718633	1317	2335	0.639376
AT1G20220	658	225	0.745187	291	644	0.68877		728	260	0.736842	444	667	0.60036
AT1G20225	1826	522	0.777683	935	1292	0.580153		3402	818	0.806161	1144	1802	0.611677
AT1G20230	8	2	0.8	9	29	0.763158		5	1	0.833333	10	18	0.642857
AT1G20260	79	22	0.782178	32	60	0.652174		370	145	0.718447	231	373	0.61755
AT1G20270	360	106	0.772532	184	245	0.571096		519	197	0.72486	190	332	0.636015
AT1G20300	647	186	0.776711	471	681	0.591146		176	87	0.669202	151	223	0.596257
AT1G20310	155	117	0.569853	263	695	0.72547		53	63	0.456897	31	181	0.853774
AT1G20330	524	224	0.700535	469	911	0.660145		73	56	0.565891	71	55	0.436508
AT1G20380	17	14	0.548387	8	20	0.714286		5	2	0.714286	0	3	1
AT1G20390	161	0	1	16	0	0		305	0	1	28	0	0
AT1G20410	18	3	0.857143	7	28	0.8		60	39	0.606061	26	68	0.723404
AT1G20430	620	348	0.640496	678	1483	0.686256		1397	994	0.584274	648	1901	0.745783
AT1G20440	647	76	0.894882	115	232	0.668588		4034	1847	0.685938	2297	5278	0.696766
AT1G20450	24	2	0.923077	1	0	0		54	23	0.701299	48	356	0.881188
AT1G20460	188	109	0.632997	164	298	0.645022		325	129	0.715859	119	245	0.673077
AT1G20490	272	377	0.419106	227	921	0.802265		2	1	0.666667	9	43	0.826923
AT1G20510	6	0	1	5	5	0.5		3	0	1	0	0	-
AT1G20515	1	0	1	6	6	0.5		0	0	-	1	0	0
AT1G20540	78	39	0.666667	37	83	0.691667		87	50	0.635036	24	66	0.733333
AT1G20550	75	32	0.700935	81	110	0.575916		79	20	0.79798	39	63	0.617647
AT1G20560	252	98	0.72	111	226	0.670623		296	127	0.699764	84	170	0.669291
AT1G20570	2	4	0.333333	0	0	-		0	0	-	0	0	-
AT1G20575	48	11	0.813559	28	44	0.611111		93	38	0.709924	42	60	0.588235
AT1G20580	745	288	0.7212	450	776	0.632953		500	225	0.689655	257	431	0.626453
AT1G20610	3	9	0.25	2	5	0.714286		9	8	0.529412	3	18	0.857143
AT1G20620	5800	1337	0.812666	2320	2493	0.517972		68	28	0.708333	57	74	0.564885
AT1G20630	147	89	0.622881	187	502	0.728592		134	68	0.663366	107	353	0.767391
AT1G20640	279	147	0.65493	183	388	0.67951		611	198	0.755253	125	289	0.698068
AT1G20650	112	31	0.783217	66	94	0.5875		20	7	0.740741	6	8	0.571429
AT1G20670	412	162	0.71777	202	386	0.656463		834	311	0.728384	299	593	0.664798
AT1G20691	130	66	0.663265	80	97	0.548023		15	0	1	10	19	0.655172
AT1G20693	2850	1496	0.655775	2406	4811	0.66662		670	357	0.652386	829	1679	0.669458
AT1G20696	3002	1140	0.724771	1637	3188	0.660725		1100	418	0.724638	970	2120	0.686084
AT1G20720	2	1	0.666667	0	2	1		14	5	0.736842	4	7	0.636364
AT1G20760	235	84	0.736677	75	148	0.663677		406	144	0.738182	147	231	0.611111
AT1G20780	32	18	0.64	33	41	0.554054		45	23	0.661765	25	50	0.666667
AT1G20795	0	0	-	0	4	1		0	0	-	0	0	-
AT1G20810	152	28	0.844444	50	99	0.66443		225	101	0.690184	101	216	0.681388
AT1G20816	110	97	0.531401	93	235	0.716463		75	28	0.728155	52	148	0.74
AT1G20823	64	14	0.820513	57	46	0.446602		21	2	0.913043	19	25	0.568182
AT1G20830	193	68	0.739464	106	179	0.62807		127	55	0.697802	48	108	0.692308
AT1G20840	678	416	0.619744	326	952	0.744914		1471	940	0.61012	1013	2670	0.724952
AT1G20870	16	8	0.666667	7	16	0.695652		24	7	0.774194	3	7	0.7
AT1G20880	8	0	1	1	7	0.875		29	10	0.74359	12	17	0.586207
AT1G20890	105	40	0.724138	62	133	0.682051		84	17	0.831683	62	71	0.533835
AT1G20900	581	121	0.827635	312	263	0.457391		1462	481	0.752445	692	872	0.557545
AT1G20910	11	9	0.55	7	17	0.708333		33	9	0.785714	13	6	0.315789
AT1G20920	46	17	0.730159	16	31	0.659574		47	6	0.886792	22	31	0.584906
AT1G20950	29	15	0.659091	8	17	0.68		35	16	0.686275	17	18	0.514286
AT1G20960	1212	359	0.771483	632	940	0.597964		734	170	0.811947	308	503	0.620222
AT1G20970	701	121	0.852798	438	460	0.512249		1341	165	0.890438	270	317	0.540034
AT1G20980	639	204	0.758007	343	535	0.609339		1006	309	0.765019	391	734	0.652444
AT1G21000	1055	458	0.69729	729	1480	0.669986		588	211	0.73592	200	430	0.68254
AT1G21010	113	16	0.875969	80	122	0.60396		200	94	0.680272	117	332	0.739421
AT1G21060	52	35	0.597701	36	73	0.669725		131	76	0.63285	38	83	0.68595
AT1G21065	103	54	0.656051	53	113	0.680723		67	35	0.656863	31	41	0.569444
AT1G21080	5	5	0.5	2	3	0.6		2	5	0.285714	1	0	0
AT1G21090	4	3	0.571429	7	2	0.222222		4	3	0.571429	5	20	0.8
AT1G21150	37	3	0.925	14	10	0.416667		134	89	0.600897	76	230	0.751634
AT1G21160	241	74	0.765079	59	116	0.662857		242	47	0.83737	112	167	0.598566
AT1G21170	41	8	0.836735	14	12	0.461538		125	57	0.686813	50	82	0.621212
AT1G21190	1076	379	0.739519	645	1011	0.610507		425	234	0.644917	301	506	0.627014
AT1G21200	66	38	0.634615	60	62	0.508197		94	40	0.701493	59	61	0.508333
AT1G21260	42	6	0.875	52	27	0.341772		39	3	0.928571	15	9	0.375
AT1G21270	35	2	0.945946	28	18	0.391304		27	4	0.870968	17	15	0.46875
AT1G21310	82	7	0.921348	74	25	0.252525		8	5	0.615385	62	37	0.373737
AT1G21326	52	27	0.658228	48	116	0.707317		51	11	0.822581	151	300	0.665188
AT1G21350	10	4	0.714286	12	7	0.368421		16	5	0.761905	6	16	0.727273
AT1G21370	43	15	0.741379	21	45	0.681818		120	33	0.784314	72	83	0.535484
AT1G21380	38	20	0.655172	13	46	0.779661		159	57	0.736111	67	103	0.605882
AT1G21390	43	15	0.741379	29	62	0.681319		53	13	0.80303	22	45	0.671642
AT1G21400	196	80	0.710145	161	240	0.598504		14	8	0.636364	1	15	0.9375
AT1G21410	33	16	0.673469	26	46	0.638889		18	3	0.857143	5	9	0.642857
AT1G21440	28	12	0.7	24	26	0.52		20	3	0.869565	5	9	0.642857
AT1G21450	1	0	1	1	1	0.5		2	0	1	1	0	0
AT1G21460	6	3	0.666667	6	14	0.7		0	1	0	0	1	1
AT1G21480	9	5	0.642857	3	6	0.666667		14	4	0.777778	6	6	0.5
AT1G21560	25	10	0.714286	11	17	0.607143		28	6	0.823529	11	12	0.521739
AT1G21580	399	138	0.743017	99	217	0.686709		657	252	0.722772	154	284	0.648402
AT1G21600	159	55	0.742991	76	200	0.724638		44	28	0.611111	137	246	0.642298
AT1G21630	92	22	0.807018	29	64	0.688172		241	92	0.723724	90	150	0.625
AT1G21640	25	11	0.694444	17	26	0.604651		70	18	0.795455	21	32	0.603774
AT1G21650	87	29	0.75	49	77	0.611111		58	26	0.690476	25	61	0.709302
AT1G21660	221	93	0.703822	118	195	0.623003		297	122	0.708831	118	178	0.601351
AT1G21670	96	34	0.738462	105	122	0.537445		3	3	0.5	9	27	0.75
AT1G21680	870	407	0.681284	630	1197	0.655172		34	15	0.693878	41	77	0.652542
AT1G21690	39	21	0.65	23	48	0.676056		79	30	0.724771	30	70	0.7
AT1G21695	12	5	0.705882	10	11	0.52381		25	6	0.806452	7	10	0.588235
AT1G21700	157	54	0.744076	105	162	0.606742		319	111	0.74186	151	247	0.620603
AT1G21710	91	45	0.669118	51	116	0.694611		167	57	0.745536	72	164	0.694915
AT1G21720	198	66	0.75	112	208	0.65		622	263	0.702825	206	459	0.690226
AT1G21730	11	3	0.785714	5	10	0.666667		122	43	0.739394	42	74	0.637931
AT1G21740	638	226	0.738426	315	639	0.669811		1645	711	0.698217	802	1783	0.689749
AT1G21750	2334	600	0.795501	1388	1725	0.554128		8463	4390	0.658445	4009	8236	0.672601
AT1G21760	182	88	0.674074	96	223	0.69906		226	87	0.722045	64	166	0.721739
AT1G21780	104	52	0.666667	104	141	0.57551		32	11	0.744186	22	28	0.56
AT1G21790	29	11	0.725	16	31	0.659574		5	5	0.5	0	5	1
AT1G21840	11	5	0.6875	5	14	0.736842		30	10	0.75	7	15	0.681818
AT1G21880	4	5	0.444444	2	12	0.857143		37	17	0.685185	33	62	0.652632
AT1G21900	307	124	0.712297	183	325	0.639764		579	226	0.719255	260	517	0.66538
AT1G21910	9	0	1	0	0	-		185	83	0.690299	123	221	0.642442
AT1G21920	294	139	0.678984	225	358	0.614065		127	85	0.599057	44	397	0.900227
AT1G21930	49	17	0.742424	31	53	0.630952		68	42	0.618182	44	97	0.687943
AT1G21980	30	14	0.681818	15	26	0.634146		158	51	0.755981	95	186	0.661922
AT1G22020	163	69	0.702586	112	244	0.685393		344	156	0.688	156	312	0.666667
AT1G22040	21	1	0.954545	10	29	0.74359		44	13	0.77193	16	45	0.737705
AT1G22050	57	21	0.730769	27	62	0.696629		102	54	0.653846	39	113	0.743421
AT1G22060	57	28	0.670588	34	72	0.679245		144	61	0.702439	25	100	0.8
AT1G22070	285	111	0.719697	180	370	0.672727		252	80	0.759036	336	671	0.666336
AT1G22090	0	27	0	0	51	1		0	0	-	0	3	1
AT1G22110	115	21	0.845588	120	137	0.533074		239	102	0.70088	80	224	0.736842
AT1G22140	54	17	0.760563	34	46	0.575		124	40	0.756098	55	103	0.651899
AT1G22160	3	2	0.6	2	7	0.777778		0	0	-	0	0	-
AT1G22170	5	0	1	0	0	-		109	31	0.778571	53	101	0.655844
AT1G22180	263	103	0.718579	159	333	0.676829		316	102	0.755981	138	263	0.65586
AT1G22190	204	101	0.668852	228	395	0.634029		189	37	0.836283	51	67	0.567797
AT1G22200	234	125	0.651811	188	351	0.651206		490	176	0.735736	230	416	0.643963
AT1G22220	20	0	1	6	10	0.625		22	2	0.916667	33	6	0.153846
AT1G22250	3	1	0.75	2	1	0.333333		37	33	0.528571	177	486	0.733032
AT1G22260	4	1	0.8	2	5	0.714286		67	49	0.577586	27	83	0.754545
AT1G22270	1643	435	0.790664	1175	1936	0.622308		628	165	0.791929	390	575	0.595855
AT1G22275	0	0	-	0	0	-		2	1	0.666667	3	1	0.25
AT1G22300	411	134	0.754128	260	463	0.640387		1139	440	0.721343	463	923	0.665945
AT1G22310	60	33	0.645161	38	47	0.552941		70	47	0.598291	40	64	0.615385
AT1G22340	27	7	0.794118	3	17	0.85		57	39	0.59375	46	108	0.701299
AT1G22350	76	43	0.638655	49	55	0.528846		36	44	0.45	55	219	0.79927
AT1G22360	3989	134	0.967499	792	112	0.123894		40413	685	0.983333	10416	1743	0.143351
AT1G22370	4629	1346	0.774728	2951	2565	0.465011		452	9	0.980477	116	34	0.226667
AT1G22380	31	73	0.298077	132	361	0.732252		6	23	0.206897	17	258	0.938182
AT1G22400	170	3	0.982659	22	28	0.56		4727	160	0.96726	1450	527	0.266566
AT1G22403	45	13	0.775862	18	29	0.617021		249	25	0.908759	63	64	0.503937
AT1G22410	29	8	0.783784	10	21	0.677419		134	69	0.660099	72	175	0.708502
AT1G22430	9	17	0.346154	8	41	0.836735		12	13	0.48	22	50	0.694444
AT1G22510	12	8	0.6	7	11	0.611111		25	10	0.714286	13	32	0.711111
AT1G22520	263	132	0.665823	182	414	0.694631		807	420	0.657702	384	850	0.688817
AT1G22530	420	68	0.860656	100	93	0.481865		828	204	0.802326	299	599	0.667038
AT1G22540	86	53	0.618705	101	130	0.562771		80	43	0.650407	32	125	0.796178
AT1G22550	0	0	-	0	0	-		0	0	-	3	9	0.75
AT1G22570	289	20	0.935275	83	27	0.245455		1070	94	0.919244	842	389	0.316003
AT1G22590	3	5	0.375	5	9	0.642857		12	2	0.857143	6	7	0.538462
AT1G22600	557	234	0.704172	275	521	0.654523		12	3	0.8	11	16	0.592593
AT1G22620	211	90	0.700997	145	234	0.617414		229	92	0.713396	84	132	0.611111
AT1G22640	24	3	0.888889	26	34	0.566667		21	6	0.777778	13	20	0.606061
AT1G22660	71	29	0.71	43	113	0.724359		90	40	0.692308	33	67	0.67
AT1G22700	57	26	0.686747	51	75	0.595238		81	28	0.743119	48	99	0.673469
AT1G22710	4	3	0.571429	0	0	-		2	4	0.333333	42	15	0.263158
AT1G22730	445	182	0.709729	288	484	0.626943		557	211	0.72526	350	717	0.671978
AT1G22740	42	31	0.575342	21	23	0.522727		244	144	0.628866	123	254	0.67374
AT1G22750	209	65	0.762774	114	201	0.638095		659	177	0.788278	172	378	0.687273
AT1G22770	277	143	0.659524	173	383	0.688849		261	156	0.625899	61	158	0.721461
AT1G22780	15	5	0.75	14	21	0.6		9	8	0.529412	7	14	0.666667
AT1G22790	28	4	0.875	5	17	0.772727		18	5	0.782609	8	11	0.578947
AT1G22830	11	3	0.785714	16	17	0.515152		6	0	1	0	5	1
AT1G22840	3	0	1	1	0	0		3	1	0.75	1	1	0.5
AT1G22850	328	136	0.706897	114	254	0.690217		762	202	0.790456	309	452	0.593955
AT1G22860	67	32	0.676768	40	67	0.626168		103	50	0.673203	23	57	0.7125
AT1G22870	115	38	0.751634	48	70	0.59322		104	36	0.742857	27	49	0.644737
AT1G22880	279	148	0.653396	187	341	0.645833		98	33	0.748092	69	185	0.728346
AT1G22882	160	73	0.686695	75	141	0.652778		736	318	0.698292	391	837	0.681596
AT1G22885	27	4	0.870968	23	18	0.439024		9	1	0.9	4	11	0.733333
AT1G22890	0	0	-	8	2	0.2		0	0	-	0	4	1
AT1G22900	29	8	0.783784	14	11	0.44		60	35	0.631579	82	290	0.77957
AT1G22920	569	231	0.71125	284	693	0.709314		652	240	0.730942	320	606	0.654428
AT1G22930	729	240	0.752322	273	543	0.665441		1498	443	0.771767	427	778	0.645643
AT1G22940	55	20	0.733333	30	83	0.734513		81	18	0.818182	31	45	0.592105
AT1G22960	25	12	0.675676	21	36	0.631579		28	10	0.736842	10	39	0.795918
AT1G22970	2	0	1	2	2	0.5		2	1	0.666667	0	0	-
AT1G22980	5	5	0.5	6	12	0.666667		0	3	0	0	6	1
AT1G22985	83	37	0.691667	75	182	0.708171		48	27	0.64	25	50	0.666667
AT1G23000	0	0	-	0	0	-		2	1	0.666667	0	0	-
AT1G23020	798	166	0.827801	338	382	0.530556		6479	1963	0.767472	1996	2035	0.504838
AT1G23030	11	2	0.846154	4	7	0.636364		115	44	0.72327	65	108	0.624277
AT1G23050	1526	381	0.80021	888	981	0.52488		2161	254	0.894824	763	551	0.41933
AT1G23060	0	0	-	2	5	0.714286		5	5	0.5	1	5	0.833333
AT1G23070	1114	404	0.73386	812	1216	0.599606		7	12	0.368421	3	13	0.8125
AT1G23080	788	310	0.717668	373	1306	0.777844		3014	1189	0.717107	1563	2886	0.648685
AT1G23090	82	20	0.803922	7	13	0.65		331	106	0.757437	78	177	0.694118
AT1G23100	23	11	0.676471	26	34	0.566667		8	9	0.470588	4	17	0.809524
AT1G23120	422	344	0.550914	305	1432	0.82441		175	56	0.757576	92	245	0.727003
AT1G23180	193	77	0.714815	83	162	0.661224		312	193	0.617822	100	170	0.62963
AT1G23190	403	114	0.779497	129	274	0.679901		1144	481	0.704	329	647	0.66291
AT1G23220	67	29	0.697917	49	100	0.671141		62	26	0.704545	45	58	0.563107
AT1G23230	38	22	0.633333	29	56	0.658824		59	34	0.634409	33	66	0.666667
AT1G23280	106	54	0.6625	72	170	0.702479		27	11	0.710526	21	47	0.691176
AT1G23310	161	68	0.703057	72	148	0.672727		149	52	0.741294	70	146	0.675926
AT1G23330	0	0	-	0	3	1		19	2	0.904762	14	17	0.548387
AT1G23360	62	11	0.849315	5	24	0.827586		183	65	0.737903	42	139	0.767956
AT1G23380	378	103	0.785863	226	275	0.548902		1452	406	0.781485	718	1151	0.615837
AT1G23390	24	7	0.774194	25	48	0.657534		17	6	0.73913	18	32	0.64
AT1G23400	202	57	0.779923	90	224	0.713376		283	113	0.714646	120	214	0.640719
AT1G23440	1239	575	0.683021	885	2208	0.71387		4863	1547	0.758658	1321	2931	0.689323
AT1G23450	0	0	-	0	4	1		2	1	0.666667	0	0	-
AT1G23460	32	15	0.680851	7	8	0.533333		7	2	0.777778	9	6	0.4
AT1G23465	9	1	0.9	5	5	0.5		23	6	0.793103	10	13	0.565217
AT1G23470	18	3	0.857143	4	13	0.764706		21	2	0.913043	12	12	0.5
AT1G23490	13	10	0.565217	12	20	0.625		35	27	0.564516	31	80	0.720721
AT1G23550	104	48	0.684211	86	113	0.567839		222	76	0.744966	107	182	0.629758
AT1G23560	0	0	-	0	0	-		11	0	1	5	6	0.545455
AT1G23710	200	78	0.719424	138	242	0.636842		345	98	0.778781	121	167	0.579861
AT1G23740	456	386	0.541568	144	697	0.828775		1600	875	0.646465	483	1073	0.689589
AT1G23750	1	12	0.0769231	2	39	0.95122		50	37	0.574713	41	108	0.724832
AT1G23770	9	5	0.642857	5	15	0.75		4	1	0.8	0	0	-
AT1G23780	4300	1056	0.802838	3482	2836	0.448876		3239	966	0.770273	1501	1384	0.479723
AT1G23820	630	242	0.722477	370	689	0.650614		774	221	0.777889	506	635	0.556529
AT1G23840	0	4	0	0	7	1		0	0	-	0	15	1
AT1G23860	7	4	0.636364	3	13	0.8125		15	12	0.555556	6	8	0.571429
AT1G23870	115	59	0.66092	62	135	0.685279		133	53	0.715054	91	175	0.657895
AT1G23880	12	9	0.571429	6	9	0.6		40	29	0.57971	15	49	0.765625
AT1G23890	831	310	0.728309	421	909	0.683459		511	145	0.778963	250	367	0.594814
AT1G23900	358	110	0.764957	130	245	0.653333		618	194	0.761084	266	324	0.549153
AT1G23915	0	43	0	0	63	1		1	28	0.0344828	4	87	0.956044
AT1G23935	16	30	0.347826	20	73	0.784946		6	6	0.5	1	10	0.909091
AT1G23960	267	114	0.700787	170	354	0.675573		299	92	0.764706	129	200	0.607903
AT1G23965	0	0	-	0	0	-		1	1	0.5	0	3	1
AT1G23970	0	0	-	0	0	-		1	1	0.5	0	3	1
AT1G23980	24	6	0.8	24	46	0.657143		52	17	0.753623	12	46	0.793103
AT1G24030	5	5	0.5	1	5	0.833333		7	1	0.875	0	1	1
AT1G24040	43	14	0.754386	20	56	0.736842		42	15	0.736842	15	37	0.711538
AT1G24050	550	238	0.69797	348	688	0.664093		550	174	0.759669	216	357	0.623037
AT1G24090	0	0	-	1	0	0		0	0	-	0	0	-
AT1G24095	10	1	0.909091	6	10	0.625		264	114	0.698413	97	197	0.670068
AT1G24100	446	112	0.799283	160	285	0.640449		2762	1129	0.709843	1650	2828	0.631532
AT1G24120	356	102	0.777293	200	354	0.638989		720	296	0.708661	308	692	0.692
AT1G24140	0	0	-	0	0	-		0	0	-	0	3	1
AT1G24150	3	0	1	4	3	0.428571		16	5	0.761905	12	27	0.692308
AT1G24160	163	53	0.75463	83	129	0.608491		189	82	0.697417	73	126	0.633166
AT1G24170	53	3	0.946429	19	11	0.366667		1597	543	0.746262	1093	1866	0.630618
AT1G24180	37	11	0.770833	8	16	0.666667		51	22	0.69863	28	42	0.6
AT1G24190	247	68	0.784127	95	148	0.609053		305	114	0.727924	103	161	0.609848
AT1G24210	17	12	0.586207	20	28	0.583333		5	3	0.625	2	15	0.882353
AT1G24240	114	14	0.890625	97	40	0.291971		305	7	0.977564	110	28	0.202899
AT1G24265	64	43	0.598131	27	61	0.693182		13	7	0.65	4	16	0.8
AT1G24267	211	83	0.717687	110	203	0.648562		312	113	0.734118	134	287	0.68171
AT1G24280	4	0	1	2	4	0.666667		38	27	0.584615	21	49	0.7
AT1G24290	55	12	0.820896	37	65	0.637255		12	13	0.48	11	21	0.65625
AT1G24300	175	81	0.683594	91	152	0.625514		309	144	0.682119	86	237	0.733746
AT1G24310	0	1	0	1	1	0.5		2	1	0.666667	1	0	0
AT1G24340	54	21	0.72	30	56	0.651163		58	19	0.753247	21	45	0.681818
AT1G24360	101	40	0.716312	36	83	0.697479		255	101	0.716292	110	221	0.667674
AT1G24440	16	10	0.615385	4	35	0.897436		45	15	0.75	22	22	0.5
AT1G24450	364	123	0.747433	222	304	0.577947		127	55	0.697802	58	85	0.594406
AT1G24460	553	206	0.72859	307	512	0.625153		1055	433	0.709005	401	734	0.646696
AT1G24490	2134	883	0.707325	1676	2779	0.623793		2362	1006	0.701306	911	1659	0.645525
AT1G24510	3649	1696	0.682694	2909	5079	0.635829		2844	1234	0.697401	1624	2727	0.626752
AT1G24530	808	147	0.846073	248	223	0.473461		3277	533	0.860105	1055	847	0.445321
AT1G24560	190	72	0.725191	98	140	0.588235		328	98	0.769953	123	221	0.642442
AT1G24575	0	0	-	3	1	0.25		0	0	-	0	0	-
AT1G24580	198	186	0.515625	126	349	0.734737		9	6	0.6	4	13	0.764706
AT1G24610	17	7	0.708333	4	4	0.5		25	9	0.735294	8	10	0.555556
AT1G24706	215	124	0.634218	94	174	0.649254		261	128	0.670951	81	202	0.713781
AT1G24735	2	0	1	2	5	0.714286		0	0	-	0	0	-
AT1G24764	89	7	0.927083	29	33	0.532258		263	70	0.78979	410	375	0.477707
AT1G25220	82	22	0.788462	31	74	0.704762		118	59	0.666667	77	176	0.695652
AT1G25260	39	36	0.52	31	71	0.696078		28	4	0.875	17	39	0.696429
AT1G25275	506	128	0.798107	159	251	0.612195		567	98	0.852632	232	255	0.523614
AT1G25280	61	22	0.73494	44	52	0.541667		118	31	0.791946	45	81	0.642857
AT1G25290	13	3	0.8125	11	9	0.45		25	9	0.735294	8	16	0.666667
AT1G25310	288	76	0.791209	118	141	0.544402		0	0	-	0	0	-
AT1G25320	28	8	0.777778	23	38	0.622951		5	1	0.833333	9	7	0.4375
AT1G25350	131	57	0.696809	63	134	0.680203		148	61	0.708134	70	148	0.678899
AT1G25360	8	6	0.571429	4	9	0.692308		4	0	1	4	5	0.555556
AT1G25370	202	104	0.660131	136	276	0.669903		256	89	0.742029	86	166	0.65873
AT1G25375	322	113	0.74023	122	234	0.657303		772	251	0.754643	241	295	0.550373
AT1G25380	2260	518	0.813535	1072	1551	0.591308		9092	1904	0.826846	4033	3722	0.479948
AT1G25390	76	24	0.76	52	61	0.539823		107	25	0.810606	80	86	0.518072
AT1G25400	0	0	-	0	0	-		17	5	0.772727	12	9	0.428571
AT1G25410	0	0	-	0	2	1		0	0	-	0	0	-
AT1G25420	267	103	0.721622	154	260	0.628019		504	188	0.728324	185	361	0.661172
AT1G25422	53	26	0.670886	14	42	0.75		0	0	-	0	0	-
AT1G25450	149	82	0.645022	151	263	0.635266		253	70	0.783282	173	311	0.642562
AT1G25470	99	57	0.634615	97	200	0.673401		106	49	0.683871	78	186	0.704545
AT1G25480	37	13	0.74	12	24	0.666667		91	30	0.752066	24	58	0.707317
AT1G25490	123	49	0.715116	49	105	0.681818		281	76	0.787115	78	151	0.659389
AT1G25500	10	4	0.714286	2	6	0.75		35	14	0.714286	16	29	0.644444
AT1G25510	6	1	0.857143	5	9	0.642857		12	4	0.75	2	5	0.714286
AT1G25520	4	0	1	0	2	1		20	10	0.666667	7	9	0.5625
AT1G25540	231	86	0.728707	96	147	0.604938		364	113	0.763103	124	225	0.644699
AT1G25550	196	26	0.882883	161	156	0.492114		676	166	0.80285	322	504	0.610169
AT1G25560	38	0	1	0	0	-		250	83	0.750751	190	391	0.672978
AT1G25570	142	49	0.743455	46	106	0.697368		570	194	0.746073	208	364	0.636364
AT1G25580	12	5	0.705882	17	27	0.613636		15	5	0.75	11	15	0.576923
AT1G25682	164	40	0.803922	86	138	0.616071		226	84	0.729032	90	195	0.684211
AT1G26110	1593	612	0.722449	842	1420	0.627763		1517	553	0.73285	598	1068	0.641056
AT1G26120	11	4	0.733333	3	3	0.5		17	4	0.809524	4	14	0.777778
AT1G26130	34	20	0.62963	11	32	0.744186		37	12	0.755102	20	30	0.6
AT1G26150	227	66	0.774744	61	77	0.557971		1359	257	0.840965	335	370	0.524823
AT1G26160	20	7	0.740741	10	19	0.655172		34	4	0.894737	8	8	0.5
AT1G26170	66	32	0.673469	25	38	0.603175		72	14	0.837209	34	58	0.630435
AT1G26180	66	14	0.825	23	47	0.671429		109	47	0.698718	57	114	0.666667
AT1G26190	89	48	0.649635	54	103	0.656051		174	95	0.64684	103	152	0.596078
AT1G26208	32	1	0.969697	3	11	0.785714		243	66	0.786408	57	73	0.561538
AT1G26218	146	51	0.741117	97	198	0.671186		67	17	0.797619	11	36	0.765957
AT1G26260	80	21	0.792079	34	47	0.580247		544	129	0.808321	212	378	0.640678
AT1G26270	201	35	0.851695	156	139	0.471186		593	175	0.772135	854	1056	0.55288
AT1G26300	83	31	0.72807	33	63	0.65625		233	75	0.756494	115	152	0.569288
AT1G26330	0	0	-	0	0	-		3	2	0.6	0	3	1
AT1G26340	38	24	0.612903	21	31	0.596154		73	26	0.737374	55	83	0.601449
AT1G26370	8	0	1	4	3	0.428571		0	0	-	2	2	0.5
AT1G26400	102	8	0.927273	108	84	0.4375		0	0	-	0	0	-
AT1G26410	8	0	1	8	4	0.333333		10	2	0.833333	35	21	0.375
AT1G26420	20	4	0.833333	10	7	0.411765		13	2	0.866667	14	18	0.5625
AT1G26440	211	37	0.850806	56	61	0.521368		217	78	0.735593	55	69	0.556452
AT1G26460	116	49	0.70303	97	152	0.610442		164	65	0.716157	77	140	0.645161
AT1G26520	26	10	0.722222	18	19	0.513514		21	10	0.677419	8	16	0.666667
AT1G26530	15	31	0.326087	7	59	0.893939		0	6	0	0	18	1
AT1G26558	0	0	-	2	15	0.882353		7	4	0.636364	3	22	0.88
AT1G26620	18	23	0.439024	12	40	0.769231		64	34	0.653061	65	153	0.701835
AT1G26630	1530	764	0.666957	854	2377	0.735686		2413	1116	0.683763	1071	2685	0.714856
AT1G26640	148	128	0.536232	48	200	0.806452		362	125	0.743326	140	259	0.649123
AT1G26650	77	24	0.762376	57	114	0.666667		70	33	0.679612	25	67	0.728261
AT1G26660	2	3	0.4	1	1	0.5		0	0	-	0	1	1
AT1G26665	753	204	0.786834	843	815	0.491556		195	41	0.826271	231	250	0.519751
AT1G26670	70	25	0.736842	35	92	0.724409		249	95	0.723837	111	230	0.674487
AT1G26690	44	23	0.656716	28	55	0.662651		78	38	0.672414	26	59	0.694118
AT1G26740	145	80	0.644444	87	209	0.706081		105	45	0.7	55	129	0.701087
AT1G26750	75	44	0.630252	58	124	0.681319		187	66	0.73913	118	214	0.644578
AT1G26762	235	80	0.746032	143	189	0.569277		785	204	0.793731	357	414	0.536965
AT1G26770	0	1	0	1	3	0.75		8	3	0.727273	4	9	0.692308
AT1G26800	675	293	0.697314	564	1199	0.680091		314	72	0.813472	136	234	0.632432
AT1G26810	14	15	0.482759	6	52	0.896552		27	10	0.72973	3	23	0.884615
AT1G26830	171	54	0.76	95	179	0.653285		281	98	0.741425	107	212	0.664577
AT1G26840	2	2	0.5	0	0	-		5	7	0.416667	2	6	0.75
AT1G26850	162	65	0.713656	105	191	0.64527		493	221	0.690476	289	647	0.691239
AT1G26880	32	26	0.551724	25	42	0.626866		11	8	0.578947	13	17	0.566667
AT1G26900	22	8	0.733333	2	25	0.925926		31	13	0.704545	14	42	0.75
AT1G26910	23	7	0.766667	29	57	0.662791		22	3	0.88	13	23	0.638889
AT1G26920	502	0	1	338	31	0.0840108		2400	444	0.843882	1065	680	0.389685
AT1G26940	36	21	0.631579	19	75	0.797872		36	23	0.610169	19	39	0.672414
AT1G27000	1781	648	0.733224	1186	2517	0.679719		2613	716	0.78492	1209	1756	0.592243
AT1G27050	37	12	0.755102	36	36	0.5		13	2	0.866667	18	24	0.571429
AT1G27070	147	55	0.727723	67	122	0.645503		351	64	0.845783	160	126	0.440559
AT1G27080	0	0	-	3	6	0.666667		4	1	0.8	1	2	0.666667
AT1G27090	2899	1039	0.73616	1691	2402	0.586856		1345	311	0.812198	686	817	0.54358
AT1G27100	404	155	0.722719	326	531	0.619603		615	167	0.786445	209	470	0.692194
AT1G27120	0	0	-	3	12	0.8		14	13	0.518519	14	14	0.5
AT1G27130	82	11	0.88172	72	27	0.272727		4	3	0.571429	8	4	0.333333
AT1G27150	668	308	0.684426	328	872	0.726667		1824	470	0.795118	636	712	0.52819
AT1G27170	185	67	0.734127	202	204	0.502463		63	33	0.65625	28	61	0.685393
AT1G27180	16	8	0.666667	12	13	0.52		34	21	0.618182	15	40	0.727273
AT1G27190	191	63	0.751969	112	256	0.695652		233	91	0.719136	115	171	0.597902
AT1G27200	8	7	0.533333	10	36	0.782609		21	7	0.75	26	43	0.623188
AT1G27290	1236	550	0.692049	675	1323	0.662162		2905	1052	0.734142	1150	2193	0.655998
AT1G27300	490	257	0.655957	545	1250	0.696379		586	412	0.587174	258	798	0.755682
AT1G27310	4143	1160	0.781256	2834	3365	0.542829		5983	2413	0.712601	3264	5444	0.625172
AT1G27320	263	115	0.695767	161	263	0.620283		610	173	0.779055	186	377	0.669627
AT1G27340	6	5	0.545455	2	14	0.875		35	26	0.57377	28	61	0.685393
AT1G27360	12	3	0.8	1	3	0.75		12	5	0.705882	3	7	0.7
AT1G27370	7	7	0.5	5	7	0.583333		9	2	0.818182	2	7	0.777778
AT1G27385	164	88	0.650794	108	188	0.635135		254	91	0.736232	99	180	0.645161
AT1G27390	985	565	0.635484	777	1592	0.672014		747	412	0.644521	532	1129	0.679711
AT1G27400	400	211	0.654664	246	493	0.667118		264	144	0.647059	221	380	0.63228
AT1G27410	76	18	0.808511	42	42	0.5		29	4	0.878788	11	20	0.645161
AT1G27420	3	1	0.75	0	0	-		0	0	-	0	0	-
AT1G27430	63	29	0.684783	25	40	0.615385		65	27	0.706522	22	38	0.633333
AT1G27435	39	5	0.886364	20	17	0.459459		49	8	0.859649	44	28	0.388889
AT1G27440	1	2	0.333333	2	5	0.714286		3	1	0.75	2	10	0.833333
AT1G27450	0	0	-	0	0	-		1	0	1	0	1	1
AT1G27460	9	3	0.75	2	2	0.5		20	8	0.714286	8	13	0.619048
AT1G27470	160	74	0.683761	96	224	0.7		17	7	0.708333	15	32	0.680851
AT1G27500	11	6	0.647059	16	33	0.673469		26	11	0.702703	17	29	0.630435
AT1G27510	941	340	0.734582	563	720	0.561185		1031	250	0.80484	358	538	0.600446
AT1G27520	254	44	0.852349	117	68	0.367568		362	68	0.84186	91	138	0.60262
AT1G27530	1115	395	0.738411	619	1146	0.649292		1755	701	0.714577	630	1272	0.66877
AT1G27540	107	40	0.727891	72	112	0.608696		203	64	0.7603	87	120	0.57971
AT1G27555	0	1	0	0	0	-		0	0	-	0	0	-
AT1G27570	0	1	0	1	11	0.916667		0	0	-	0	0	-
AT1G27595	9	0	1	3	0	0		2	2	0.5	0	0	-
AT1G27600	202	100	0.668874	97	281	0.743386		267	122	0.686375	119	204	0.631579
AT1G27630	3	1	0.75	1	1	0.5		1	0	1	0	0	-
AT1G27640	8	5	0.615385	5	10	0.666667		10	8	0.555556	3	8	0.727273
AT1G27650	6173	2101	0.746072	4136	6458	0.60959		3195	905	0.779268	1430	2013	0.584665
AT1G27680	214	83	0.720539	187	230	0.551559		140	13	0.915033	69	98	0.586826
AT1G27695	99	25	0.798387	79	123	0.608911		112	37	0.751678	53	76	0.589147
AT1G27700	0	0	-	0	0	-		4	0	1	2	0	0
AT1G27750	162	69	0.701299	71	156	0.687225		143	55	0.722222	49	144	0.746114
AT1G27752	171	72	0.703704	72	151	0.67713		124	57	0.685083	36	75	0.675676
AT1G27760	70	23	0.752688	44	40	0.47619		230	38	0.858209	85	95	0.527778
AT1G27840	31	4	0.885714	13	10	0.434783		35	19	0.648148	22	46	0.676471
AT1G27850	96	45	0.680851	51	109	0.68125		163	72	0.693617	90	105	0.538462
AT1G27860	1	5	0.166667	2	7	0.777778		0	5	0	1	3	0.75
AT1G27880	9	11	0.45	0	6	1		16	8	0.666667	5	15	0.75
AT1G27900	91	45	0.669118	44	102	0.69863		82	31	0.725664	28	88	0.758621
AT1G27910	77	32	0.706422	31	77	0.712963		70	42	0.625	33	46	0.582278
AT1G27921	111	36	0.755102	24	35	0.59322		167	64	0.722944	16	38	0.703704
AT1G27930	12	10	0.545455	4	30	0.882353		124	129	0.490119	100	264	0.725275
AT1G27950	2745	1241	0.68866	2200	4183	0.655334		3124	1796	0.634959	916	2539	0.734877
AT1G27960	38	8	0.826087	26	11	0.297297		31	4	0.885714	7	9	0.5625
AT1G27970	173	64	0.729958	109	210	0.658307		953	500	0.655884	508	1465	0.742524
AT1G27980	218	55	0.798535	88	164	0.650794		928	350	0.726135	325	819	0.715909
AT1G27990	1034	494	0.676702	666	1366	0.672244		1	0	1	3	4	0.571429
AT1G28050	452	196	0.697531	402	653	0.618957		134	50	0.728261	221	489	0.688732
AT1G28060	185	224	0.452323	108	524	0.829114		232	117	0.664756	120	314	0.723502
AT1G28070	16	7	0.695652	17	31	0.645833		13	13	0.5	11	15	0.576923
AT1G28090	134	53	0.716578	59	126	0.681081		340	156	0.685484	99	266	0.728767
AT1G28100	122	24	0.835616	4	5	0.555556		446	133	0.770294	73	111	0.603261
AT1G28110	114	10	0.919355	14	9	0.391304		419	117	0.781716	96	130	0.575221
AT1G28120	256	62	0.805031	115	145	0.557692		897	341	0.724556	321	668	0.67543
AT1G28140	119	48	0.712575	82	160	0.661157		100	58	0.632911	40	106	0.726027
AT1G28150	419	118	0.780261	217	332	0.604736		207	202	0.506112	151	575	0.792011
AT1G28190	4	2	0.666667	8	12	0.6		0	0	-	0	0	-
AT1G28200	281	110	0.71867	98	224	0.695652		228	56	0.802817	104	178	0.631206
AT1G28210	1	0	1	0	1	1		0	0	-	0	2	1
AT1G28230	21	3	0.875	2	4	0.666667		0	0	-	0	0	-
AT1G28240	66	29	0.694737	19	38	0.666667		311	96	0.764128	155	241	0.608586
AT1G28250	0	0	-	0	1	1		5	1	0.833333	7	3	0.3
AT1G28260	162	44	0.786408	107	145	0.575397		197	60	0.766537	77	114	0.596859
AT1G28280	209	60	0.776952	133	178	0.572347		952	286	0.768982	473	684	0.591184
AT1G28290	923	263	0.778246	1139	1768	0.608187		778	350	0.689716	323	588	0.645445
AT1G28320	167	93	0.642308	97	201	0.674497		509	159	0.761976	176	284	0.617391
AT1G28330	0	0	-	1	4	0.8		0	0	-	0	2	1
AT1G28340	15	7	0.681818	11	17	0.607143		50	11	0.819672	29	35	0.546875
AT1G28350	81	23	0.778846	52	62	0.54386		158	61	0.721461	57	118	0.674286
AT1G28360	251	54	0.822951	189	235	0.554245		9	1	0.9	4	6	0.6
AT1G28370	6	3	0.666667	4	9	0.692308		0	0	-	5	8	0.615385
AT1G28380	49	34	0.590361	30	62	0.673913		57	22	0.721519	26	59	0.694118
AT1G28390	35	9	0.795455	28	39	0.58209		76	22	0.77551	31	48	0.607595
AT1G28395	2	1	0.666667	2	8	0.8		2	0	1	1	1	0.5
AT1G28400	25	9	0.735294	4	5	0.555556		3	1	0.75	5	3	0.375
AT1G28410	45	20	0.692308	27	51	0.653846		72	32	0.692308	37	71	0.657407
AT1G28420	432	163	0.72605	245	414	0.628225		613	252	0.708671	238	511	0.682243
AT1G28440	520	183	0.739687	418	547	0.566839		3173	1989	0.614684	3379	7505	0.689544
AT1G28480	0	0	-	0	0	-		8	0	1	0	3	1
AT1G28490	22	7	0.758621	9	38	0.808511		48	28	0.631579	19	41	0.683333
AT1G28510	1	0	1	0	0	-		0	0	-	1	0	0
AT1G28520	149	59	0.716346	74	131	0.639024		141	53	0.726804	81	128	0.61244
AT1G28530	69	27	0.71875	31	56	0.643678		5	3	0.625	2	16	0.888889
AT1G28540	4	0	1	0	7	1		8	3	0.727273	0	3	1
AT1G28560	50	27	0.649351	15	64	0.810127		55	20	0.733333	22	43	0.661538
AT1G28580	237	30	0.88764	30	42	0.583333		3233	732	0.815385	1369	1709	0.555231
AT1G28600	13	8	0.619048	6	7	0.538462		240	183	0.567376	257	627	0.709276
AT1G28610	0	0	-	0	0	-		0	2	0	0	3	1
AT1G28620	10	36	0.217391	13	7	0.35		3	7	0.3	4	3	0.428571
AT1G28640	906	486	0.650862	624	1102	0.63847		63	25	0.715909	122	29	0.192053
AT1G28650	467	26	0.947262	298	72	0.194595		1114	52	0.955403	511	160	0.23845
AT1G28660	440	46	0.90535	75	77	0.506579		4471	2101	0.68031	1931	4103	0.67998
AT1G28670	434	1	0.997701	0	5	1		7929	1296	0.859512	5768	3102	0.349718
AT1G28685	382	100	0.792531	75	166	0.688797		2876	2233	0.562928	1440	4370	0.752151
AT1G28690	30	6	0.833333	27	23	0.46		0	0	-	8	10	0.555556
AT1G28710	24	9	0.727273	0	7	1		3	0	1	13	24	0.648649
AT1G28715	19	4	0.826087	11	11	0.5		21	8	0.724138	2	6	0.75
AT1G28760	19	7	0.730769	20	40	0.666667		30	10	0.75	28	35	0.555556
AT1G28765	5	2	0.714286	1	2	0.666667		9	0	1	0	0	-
AT1G28815	28	1	0.965517	0	0	-		11	3	0.785714	9	9	0.5
AT1G28960	184	65	0.738956	83	111	0.572165		188	71	0.725869	53	61	0.535088
AT1G29030	109	47	0.698718	56	120	0.681818		10	8	0.555556	15	42	0.736842
AT1G29040	3	2	0.6	4	5	0.555556		20	3	0.869565	8	8	0.5
AT1G29060	275	75	0.785714	132	199	0.601208		782	199	0.797146	232	358	0.60678
AT1G29070	1696	1018	0.624908	910	2977	0.765886		4763	2280	0.676274	3572	8552	0.705378
AT1G29120	4	0	1	0	1	1		32	15	0.680851	5	13	0.722222
AT1G29150	178	59	0.751055	125	282	0.692875		472	185	0.718417	190	346	0.645522
AT1G29170	48	2	0.96	4	11	0.733333		762	278	0.732692	204	331	0.618692
AT1G29179	0	0	-	0	0	-		14	15	0.482759	3	44	0.93617
AT1G29195	600	199	0.750939	283	521	0.64801		1646	394	0.806863	944	934	0.497338
AT1G29220	203	55	0.786822	121	190	0.610932		409	150	0.731664	132	273	0.674074
AT1G29240	60	38	0.612245	19	88	0.82243		204	94	0.684564	63	138	0.686567
AT1G29250	49	11	0.816667	59	101	0.63125		18	13	0.580645	11	34	0.755556
AT1G29290	4	4	0.5	6	9	0.6		0	0	-	11	34	0.755556
AT1G29300	4	0	1	0	0	-		21	10	0.677419	19	41	0.683333
AT1G29310	10	6	0.625	12	29	0.707317		110	44	0.714286	62	116	0.651685
AT1G29320	2	0	1	0	1	1		0	0	-	0	0	-
AT1G29330	288	71	0.802228	212	286	0.574297		76	28	0.730769	19	21	0.525
AT1G29340	152	26	0.853933	46	95	0.673759		216	73	0.747405	114	221	0.659701
AT1G29357	568	60	0.904459	122	88	0.419048		284	56	0.835294	44	51	0.536842
AT1G29390	0	0	-	0	0	-		6	0	1	0	0	-
AT1G29400	391	185	0.678819	182	357	0.662338		525	211	0.713315	261	570	0.685921
AT1G29418	208	92	0.693333	188	188	0.5		158	55	0.741784	125	237	0.654696
AT1G29465	11	6	0.647059	5	9	0.642857		0	0	-	1	1	0.5
AT1G29470	152	68	0.690909	72	126	0.636364		371	187	0.664875	203	406	0.666667
AT1G29530	11	1	0.916667	4	2	0.333333		10	3	0.769231	2	8	0.8
AT1G29630	25	5	0.833333	4	23	0.851852		43	17	0.716667	15	21	0.583333
AT1G29640	12	3	0.8	2	2	0.5		150	70	0.681818	134	295	0.687646
AT1G29670	0	0	-	0	0	-		0	0	-	2	1	0.333333
AT1G29680	69	43	0.616071	85	156	0.647303		0	0	-	0	0	-
AT1G29690	5	5	0.5	2	8	0.8		32	10	0.761905	6	18	0.75
AT1G29700	29	13	0.690476	17	37	0.685185		15	8	0.652174	9	9	0.5
AT1G29710	31	25	0.553571	26	69	0.726316		24	19	0.55814	19	29	0.604167
AT1G29760	161	46	0.777778	80	165	0.673469		187	53	0.779167	84	113	0.573604
AT1G29770	13	5	0.722222	8	13	0.619048		11	7	0.611111	1	4	0.8
AT1G29775	0	0	-	0	0	-		2	1	0.666667	0	3	1
AT1G29785	158	90	0.637097	99	291	0.746154		176	54	0.765217	69	101	0.594118
AT1G29790	1128	195	0.852608	788	620	0.440341		1229	431	0.740361	686	913	0.570982
AT1G29800	163	72	0.693617	75	123	0.621212		272	88	0.755556	116	159	0.578182
AT1G29810	614	394	0.609127	372	1454	0.796276		546	230	0.703608	229	433	0.654079
AT1G29820	668	519	0.562763	455	1331	0.745241		1261	415	0.752387	837	1438	0.632088
AT1G29830	0	7	0	0	24	1		0	18	0	0	39	1
AT1G29840	13	4	0.764706	12	18	0.6		41	15	0.732143	13	32	0.711111
AT1G29850	87	30	0.74359	55	135	0.710526		148	68	0.685185	71	147	0.674312
AT1G29880	1199	547	0.686712	782	1573	0.667941		1603	681	0.701839	847	1620	0.656668
AT1G29890	23	10	0.69697	8	15	0.652174		82	33	0.713043	41	62	0.601942
AT1G29900	559	242	0.697878	425	752	0.638912		96	43	0.690647	71	122	0.632124
AT1G29940	124	55	0.692737	64	130	0.670103		27	7	0.794118	10	16	0.615385
AT1G29950	474	144	0.76699	257	414	0.61699		845	357	0.702995	244	447	0.646889
AT1G29960	35	26	0.57377	28	53	0.654321		26	26	0.5	8	13	0.619048
AT1G29965	41	12	0.773585	28	40	0.588235		46	15	0.754098	18	54	0.75
AT1G29970	176	53	0.768559	86	134	0.609091		175	65	0.729167	78	128	0.621359
AT1G29980	4	0	1	4	2	0.333333		11	7	0.611111	11	17	0.607143
AT1G29990	291	76	0.792916	171	247	0.590909		446	174	0.719355	191	400	0.676819
AT1G30000	46	27	0.630137	37	74	0.666667		98	25	0.796748	40	97	0.708029
AT1G30010	100	62	0.617284	91	128	0.584475		130	44	0.747126	72	159	0.688312
AT1G30040	6	3	0.666667	8	10	0.555556		0	0	-	0	0	-
AT1G30070	262	122	0.682292	363	675	0.650289		313	100	0.757869	63	88	0.582781
AT1G30090	97	29	0.769841	58	121	0.675978		169	49	0.775229	88	141	0.615721
AT1G30100	172	67	0.719665	184	363	0.66362		0	0	-	1	2	0.666667
AT1G30110	249	100	0.713467	137	220	0.616246		268	107	0.714667	25	117	0.823944
AT1G30120	21	0	1	0	0	-		384	117	0.766467	131	218	0.624642
AT1G30130	49	17	0.742424	23	22	0.488889		74	32	0.698113	34	92	0.730159
AT1G30135	27	8	0.771429	6	11	0.647059		2	1	0.666667	0	0	-
AT1G30190	1	5	0.166667	8	16	0.666667		0	0	-	0	0	-
AT1G30200	362	146	0.712598	180	334	0.649805		363	136	0.727455	108	185	0.631399
AT1G30220	109	6	0.947826	128	53	0.292818		0	0	-	0	0	-
AT1G30230	1055	218	0.828751	1291	1053	0.449232		414	90	0.821429	340	240	0.413793
AT1G30240	224	82	0.732026	160	290	0.644444		41	17	0.706897	39	66	0.628571
AT1G30270	626	145	0.811933	298	436	0.594005		1451	331	0.814254	606	710	0.539514
AT1G30290	486	209	0.699281	281	483	0.632199		318	178	0.641129	153	343	0.691532
AT1G30300	156	27	0.852459	78	87	0.527273		365	162	0.6926	131	292	0.690307
AT1G30320	39	25	0.609375	34	62	0.645833		27	9	0.75	5	8	0.615385
AT1G30330	99	46	0.682759	46	90	0.661765		357	104	0.774403	133	242	0.645333
AT1G30360	193	79	0.709559	113	162	0.589091		26	9	0.742857	32	57	0.640449
AT1G30400	637	287	0.689394	241	457	0.654728		717	302	0.703631	265	533	0.66792
AT1G30410	76	38	0.666667	17	45	0.725806		61	20	0.753086	11	18	0.62069
AT1G30420	1	0	1	0	0	-		0	1	0	6	9	0.6
AT1G30440	0	0	-	2	2	0.5		5	2	0.714286	2	8	0.8
AT1G30450	20	15	0.571429	4	19	0.826087		136	42	0.764045	48	100	0.675676
AT1G30460	66	23	0.741573	34	69	0.669903		45	16	0.737705	24	32	0.571429
AT1G30470	388	150	0.72119	147	301	0.671875		767	279	0.73327	294	513	0.635688
AT1G30473	46	23	0.666667	40	50	0.555556		47	31	0.602564	27	42	0.608696
AT1G30475	99	53	0.651316	49	111	0.69375		142	66	0.682692	51	98	0.657718
AT1G30480	229	95	0.70679	210	234	0.527027		476	114	0.80678	108	187	0.633898
AT1G30490	22	8	0.733333	8	11	0.578947		40	19	0.677966	11	36	0.765957
AT1G30500	1293	513	0.715947	743	1443	0.66011		306	131	0.700229	105	230	0.686567
AT1G30510	2632	693	0.791579	755	1670	0.68866		3223	1768	0.645762	1257	3234	0.720107
AT1G30520	0	0	-	0	0	-		3	1	0.75	1	7	0.875
AT1G30530	14	5	0.736842	23	57	0.7125		26	19	0.577778	21	130	0.860927
AT1G30540	54	17	0.760563	12	50	0.806452		105	24	0.813953	40	94	0.701493
AT1G30545	50	103	0.326797	27	119	0.815068		114	87	0.567164	40	86	0.68254
AT1G30570	118	43	0.732919	90	187	0.67509		210	65	0.763636	99	206	0.67541
AT1G30580	2	1	0.666667	1	3	0.75		3	1	0.75	0	1	1
AT1G30590	445	330	0.574194	160	594	0.787798		258	101	0.718663	87	165	0.654762
AT1G30600	37	8	0.822222	25	8	0.242424		0	0	-	10	7	0.411765
AT1G30610	21	7	0.75	9	13	0.590909		29	6	0.828571	15	7	0.318182
AT1G30620	115	46	0.714286	80	124	0.607843		242	79	0.753894	138	250	0.64433
AT1G30630	3	0	1	2	2	0.5		18	9	0.666667	17	21	0.552632
AT1G30640	49	27	0.644737	20	54	0.72973		165	89	0.649606	53	101	0.655844
AT1G30660	5	0	1	0	0	-		7	3	0.7	3	4	0.571429
AT1G30680	160	54	0.747664	90	169	0.65251		104	29	0.781955	78	114	0.59375
AT1G30690	17	7	0.708333	30	25	0.454545		39	16	0.709091	20	45	0.692308
AT1G30700	4	0	1	1	3	0.75		33	14	0.702128	48	109	0.694268
AT1G30720	10	0	1	0	0	-		25	5	0.833333	62	40	0.392157
AT1G30730	0	0	-	0	0	-		20	33	0.377358	52	472	0.900763
AT1G30740	0	0	-	6	101	0.943925		0	0	-	0	26	1
AT1G30755	22	5	0.814815	8	16	0.666667		29	2	0.935484	10	15	0.6
AT1G30780	0	0	-	0	12	1		0	4	0	0	8	1
AT1G30810	65	23	0.738636	47	66	0.584071		24	6	0.8	10	35	0.777778
AT1G30820	3	8	0.272727	12	27	0.692308		13	2	0.866667	15	10	0.4
AT1G30835	1378	606	0.694556	764	1626	0.680335		1481	693	0.681233	545	1233	0.693476
AT1G30845	17	9	0.653846	22	18	0.45		63	23	0.732558	26	48	0.648649
AT1G30860	722	36	0.952507	870	270	0.236842		0	0	-	0	0	-
AT1G30880	2	5	0.285714	7	33	0.825		7	6	0.538462	4	15	0.789474
AT1G30890	15	3	0.833333	7	11	0.611111		59	21	0.7375	24	35	0.59322
AT1G30910	1	0	1	0	3	1		0	0	-	1	1	0.5
AT1G30935	131	23	0.850649	101	119	0.540909		117	20	0.854015	55	49	0.471154
AT1G30940	122	49	0.71345	157	215	0.577957		168	53	0.760181	114	131	0.534694
AT1G30960	12	1	0.923077	11	14	0.56		7	2	0.777778	11	3	0.214286
AT1G30970	341	156	0.686117	107	156	0.593156		380	129	0.746562	110	215	0.661538
AT1G31010	213	180	0.541985	157	379	0.70709		53	35	0.602273	39	171	0.814286
AT1G31020	229	50	0.820789	144	77	0.348416		483	78	0.860963	168	122	0.42069
AT1G31070	28	3	0.903226	4	9	0.692308		268	87	0.75493	72	151	0.67713
AT1G31120	387	165	0.701087	190	615	0.763975		466	354	0.568293	206	700	0.772627
AT1G31130	811	273	0.748155	644	1046	0.618935		2811	979	0.741689	1095	1892	0.633411
AT1G31150	156	42	0.787879	114	135	0.542169		248	22	0.918519	80	18	0.183673
AT1G31160	893	321	0.735585	464	678	0.593695		1319	258	0.836398	612	439	0.417697
AT1G31170	354	94	0.790179	225	237	0.512987		338	81	0.806683	107	129	0.54661
AT1G31175	171	73	0.70082	101	163	0.617424		214	44	0.829457	86	97	0.530055
AT1G31180	512	151	0.772247	271	401	0.596726		555	151	0.786119	269	358	0.570973
AT1G31190	44	2	0.956522	23	12	0.342857		72	8	0.9	33	45	0.576923
AT1G31220	229	152	0.60105	165	381	0.697802		214	159	0.573727	116	376	0.764228
AT1G31230	1024	296	0.775758	587	810	0.579814		1063	483	0.687581	513	796	0.608098
AT1G31240	0	0	-	3	5	0.625		12	4	0.75	4	5	0.555556
AT1G31280	1479	584	0.716917	773	1491	0.658569		1912	612	0.757528	608	1027	0.628135
AT1G31300	214	72	0.748252	98	205	0.676568		467	176	0.726283	241	416	0.633181
AT1G31320	4	0	1	4	0	0		0	0	-	0	0	-
AT1G31330	57	0	1	0	0	-		985	269	0.785486	318	626	0.663136
AT1G31340	22	7	0.758621	19	39	0.672414		49	29	0.628205	39	85	0.685484
AT1G31350	269	159	0.628505	165	779	0.825212		362	190	0.655797	139	345	0.71281
AT1G31360	6	3	0.666667	6	6	0.5		10	8	0.555556	3	3	0.5
AT1G31410	23	11	0.676471	14	29	0.674419		43	13	0.767857	9	30	0.769231
AT1G31420	1223	399	0.754007	503	878	0.635771		2792	1160	0.706478	941	1970	0.676743
AT1G31430	26	16	0.619048	29	41	0.585714		21	5	0.807692	9	27	0.75
AT1G31440	1957	416	0.824694	1035	881	0.459812		1686	283	0.856272	392	406	0.508772
AT1G31460	918	385	0.704528	521	1100	0.678593		1344	373	0.782761	493	868	0.637766
AT1G31470	463	213	0.684911	274	697	0.717817		630	224	0.737705	309	667	0.683402
AT1G31480	248	125	0.664879	125	209	0.625749		254	91	0.736232	86	182	0.679104
AT1G31500	54	13	0.80597	16	35	0.686275		110	35	0.758621	33	79	0.705357
AT1G31540	48	14	0.774194	30	27	0.473684		231	116	0.665706	141	343	0.708678
AT1G31600	167	72	0.698745	54	78	0.590909		90	38	0.703125	46	62	0.574074
AT1G31660	68	57	0.544	42	119	0.73913		19	13	0.59375	27	31	0.534483
AT1G31730	2912	695	0.807319	1535	1733	0.530294		3513	1200	0.745385	1255	2231	0.639989
AT1G31750	3768	2343	0.616593	1903	5196	0.731934		11	37	0.229167	17	142	0.893082
AT1G31760	165	60	0.733333	117	202	0.633229		30	30	0.5	5	32	0.864865
AT1G31780	926	328	0.738437	548	811	0.596762		3179	1248	0.718094	1001	2061	0.673089
AT1G31790	18	11	0.62069	13	21	0.617647		3	2	0.6	2	11	0.846154
AT1G31800	1	0	1	0	0	-		0	1	0	3	5	0.625
AT1G31810	46	19	0.707692	18	30	0.625		52	15	0.776119	20	37	0.649123
AT1G31812	668	134	0.832918	311	374	0.545985		3928	2227	0.63818	1846	4937	0.727849
AT1G31814	145	42	0.775401	88	154	0.636364		162	70	0.698276	54	133	0.71123
AT1G31817	549	223	0.71114	359	949	0.725535		827	431	0.657393	496	1045	0.678131
AT1G31830	469	93	0.83452	274	268	0.494465		226	50	0.818841	148	165	0.527157
AT1G31835	28	9	0.756757	29	26	0.472727		25	6	0.806452	15	27	0.642857
AT1G31840	10	1	0.909091	8	12	0.6		0	0	-	3	0	0
AT1G31850	5715	1259	0.819472	3473	3541	0.504847		6019	2683	0.69168	5726	12272	0.681854
AT1G31860	75	63	0.543478	82	105	0.561497		42	25	0.626866	30	71	0.70297
AT1G31870	173	71	0.709016	89	150	0.627615		191	70	0.731801	72	152	0.678571
AT1G31910	2514	1042	0.706974	1264	1204	0.487844		4368	1982	0.687874	2227	2865	0.562647
AT1G31920	14	2	0.875	2	3	0.6		41	17	0.706897	36	67	0.650485
AT1G31930	152	73	0.675556	88	163	0.649402		265	108	0.710456	109	208	0.656151
AT1G31935	18	5	0.782609	4	19	0.826087		64	46	0.581818	8	65	0.890411
AT1G31940	23	14	0.621622	14	55	0.797101		36	21	0.631579	22	28	0.56
AT1G31970	1537	1088	0.585524	740	2541	0.774459		473	371	0.560427	430	1698	0.797932
AT1G32050	1911	732	0.723042	1510	2351	0.60891		1528	614	0.713352	788	1338	0.629351
AT1G32070	80	34	0.701754	41	68	0.623853		214	74	0.743056	82	159	0.659751
AT1G32090	142	28	0.835294	48	84	0.636364		563	62	0.9008	392	304	0.436782
AT1G32120	43	11	0.796296	22	17	0.435897		38	8	0.826087	32	53	0.623529
AT1G32127	371	203	0.646341	269	631	0.701111		521	164	0.760584	225	362	0.616695
AT1G32130	101	25	0.801587	86	123	0.588517		192	60	0.761905	89	118	0.570048
AT1G32150	35	18	0.660377	11	20	0.645161		27	10	0.72973	13	26	0.666667
AT1G32160	289	131	0.688095	159	379	0.704461		370	124	0.748988	139	296	0.68046
AT1G32170	36	13	0.734694	27	63	0.7		322	131	0.710817	197	521	0.725627
AT1G32190	23	5	0.821429	2	3	0.6		24	15	0.615385	10	24	0.705882
AT1G32200	121	11	0.916667	48	25	0.342466		836	113	0.880927	520	415	0.44385
AT1G32210	877	543	0.617606	560	1901	0.77245		1917	740	0.72149	1017	1875	0.64834
AT1G32220	192	65	0.747082	161	255	0.612981		502	298	0.6275	221	432	0.661562
AT1G32230	848	291	0.744513	308	586	0.655481		2158	645	0.769889	601	1088	0.644168
AT1G32260	105	40	0.724138	76	114	0.6		65	13	0.833333	32	26	0.448276
AT1G32310	79	10	0.88764	53	38	0.417582		150	22	0.872093	87	105	0.546875
AT1G32330	45	19	0.703125	26	54	0.675		133	45	0.747191	77	120	0.609137
AT1G32340	52	27	0.658228	30	92	0.754098		108	56	0.658537	40	99	0.71223
AT1G32360	1317	426	0.755594	648	1317	0.670229		3755	1808	0.674996	1458	3143	0.683112
AT1G32370	237	86	0.733746	126	209	0.623881		601	226	0.726723	186	453	0.70892
AT1G32400	79	43	0.647541	61	99	0.61875		187	71	0.724806	88	173	0.662835
AT1G32410	3	2	0.6	0	6	1		5	2	0.714286	5	6	0.545455
AT1G32415	58	52	0.527273	43	129	0.75		7	2	0.777778	31	79	0.718182
AT1G32440	29	3	0.90625	17	51	0.75		46	11	0.807018	36	44	0.55
AT1G32460	1491	486	0.754173	686	1520	0.68903		2915	1274	0.69587	1351	2886	0.681142
AT1G32470	0	0	-	0	0	-		11	11	0.5	54	222	0.804348
AT1G32490	148	57	0.721951	73	136	0.650718		293	85	0.775132	107	188	0.637288
AT1G32500	154	73	0.678414	112	210	0.652174		426	207	0.672986	141	339	0.70625
AT1G32530	378	195	0.659686	195	512	0.724187		446	199	0.691473	187	363	0.66
AT1G32550	0	1	0	0	0	-		0	0	-	0	0	-
AT1G32560	22550	6385	0.779333	11964	15408	0.562911		1244	90	0.932534	784	415	0.346122
AT1G32570	0	8	0	0	0	-		1	5	0.166667	0	3	1
AT1G32575	0	2	0	0	0	-		0	0	-	0	0	-
AT1G32580	1068	474	0.692607	811	1367	0.62764		586	248	0.702638	360	621	0.633028
AT1G32583	22	11	0.666667	21	33	0.611111		0	0	-	6	11	0.647059
AT1G32610	18	16	0.529412	16	44	0.733333		24	7	0.774194	27	34	0.557377
AT1G32630	111	32	0.776224	47	127	0.729885		68	30	0.693878	43	54	0.556701
AT1G32640	63	21	0.75	22	43	0.661538		96	34	0.738462	37	78	0.678261
AT1G32690	18	7	0.72	24	24	0.5		114	29	0.797203	234	213	0.47651
AT1G32700	123	18	0.87234	48	67	0.582609		565	205	0.733766	238	440	0.648968
AT1G32710	177	88	0.667925	180	413	0.696459		14	4	0.777778	7	8	0.533333
AT1G32730	7	2	0.777778	1	9	0.9		8	5	0.615385	7	9	0.5625
AT1G32740	82	10	0.891304	11	9	0.45		54	4	0.931034	28	15	0.348837
[truncated: 13,817 more rows]
