# Supplementary material for: Dormancy-specific imprinting underlies maternal inheritance of seed dormancy in Arabidopsis thaliana
Source: eLife journal article supplement (doi:10.7554/elife.19573), 2016-12-22
Supplement: supp [file elife-19573-supp-v1.zip › elife_poa_e19573_Figure_2_source_data_3.xlsx]

## Sheet: MEG
Figure 2-source data 3. Imprinted genes in endosperm of mature seed
	ColxCvi_Dormant		CvixCol_Dormant			ColxCvi_Non Dormant		CvixCol_Non Dormant
gene	Col_reads	Cvi_reads	Col_reads	Cvi_reads	p-value of fisher's exact test	Col_reads	Cvi_reads	Col_reads	Cvi_reads	p-value of fisher's exact test	pignatta et al. (2014)	annotation
Dormant specific MEGs
AT1G04540	14	0	0	5	0.00982801	78	14	52	61	0.916173		Calcium-dependent lipid-binding (CaLB domain) family protein
AT1G05000	145	27	13	257	3.85872e-19	2525	606	959	1149	0.000154939		Phosphotyrosine protein phosphatases superfamily protein
AT1G10150	20	1	4	20	0.0209943	631	102	382	420	0.297932		Carbohydrate-binding protein
AT1G23360	62	11	5	24	0.00533879	183	65	42	139	0.00847837		MENG, S-adenosyl-L-methionine-dependent methyltransferases superfamily protein
AT1G28670	434	1	0	5	2.01603e-49	7929	1296	5768	3102	0		ARAB-1, GDSL-like Lipase/Acylhydrolase superfamily protein
AT1G29630	25	5	4	23	0.0324151	43	17	15	21	1		5'-3' exonuclease family protein
AT1G36922	81	8	0	17	5.0708e-06	165	43	0	38	7.55715e-05		unknown protein.
AT1G37160	48	0	0	5	1.33886e-06	16	0	0	0	0.0433815		transposable element gene
AT1G50350	6	1	0	14	0.0448253	19	5	0	14	0.0571324		BEST Arabidopsis thaliana protein match is: RING/U-box superfamily protein (TAIR:AT3G19950.1); Has 37 Blast hits to 37 proteins in 10 species: Archae - 0; Bacteria - 0; Metazoa - 0; Fungi - 0; Plants - 37; Viruses - 0; Other Eukaryotes - 0 (source: NCBI BLink).
AT1G62200	56	10	5	33	0.00186867	702	109	304	203	0.279331		Major facilitator superfamily protein
AT1G67650	14	0	6	25	0.044608	8	5	8	11	0.796598		SRP72 RNA-binding domain
AT1G72930	24	4	4	41	0.00143534	97	0	80	16	0.11426		TIR, toll/interleukin-1 receptor-like
AT1G73220	285	20	2	15	1.22214e-17	2846	989	1930	2339	0.000321046		ATOCT1, OCT1, ORGANIC CATION/CARNITINE TRANSPORTER1
AT1G78670	67	1	0	6	8.28945e-08	895	311	317	642	0.00227414		ATGGH3, GGH3, gamma-glutamyl hydrolase 3
AT1G80880	15	0	1	8	0.0226089	3	0	12	18	0.802969		Tetratricopeptide repeat (TPR)-like superfamily protein
AT2G03760	31	0	0	6	0.000168837	350	90	197	211	0.877449		AtSOT1, AtSOT12, ATST1, RAR047, SOT12, ST, ST1, sulphotransferase 12
AT2G10260	323	0	0	13	5.45791e-39	184	0	0	3	9.8162e-22	Yes	Ulp1 protease family protein
AT2G15940	35	7	3	20	0.0242084	55	11	34	27	0.791532		transposable element gene
AT2G16660	230	5	3	18	2.00556e-20	8089	524	4539	1507	0.0290295		Major facilitator superfamily protein
AT2G18980	22	4	0	14	0.0268594	1126	499	352	854	0.0085905		Peroxidase superfamily protein
AT2G25220	23	0	0	7	0.000797013	324	65	108	121	0.048306		Protein kinase superfamily protein
AT2G26570	23	3	6	24	0.0319371	131	65	67	153	0.657184		WEB1, WEAK CHLOROPLAST MOVEMENT UNDER BLUE LIGHT 1. maintains the chloroplast photorelocation movement velocity
AT2G27970	28	4	1	17	0.0070046	17	10	8	7	0.500623		CKS2, CDK-subunit 2
AT2G28550	124	22	3	24	3.12855e-05	535	145	775	295	1.1353e-30		RAP2.7, TOE1, related to AP2.7
AT2G33760	15	0	1	6	0.045948	0	0	0	0	1		Pentatricopeptide repeat (PPR) superfamily protein
AT2G38400	30	2	1	11	0.0028698	429	152	191	371	0.0961721		AGT3, alanine:glyoxylate aminotransferase 3
AT2G39890	360	59	23	100	2.40816e-12	4474	1674	2234	4006	0.0027088		ATPROT1, PROT1, proline transporter 1
AT2G43945	16	2	2	17	0.0459273	123	48	72	66	0.180125		unknown protein; LOCATED IN: chloroplast; BEST Arabidopsis thaliana protein match is: unknown protein (TAIR:AT3G59870.1); Has 292 Blast hits to 292 proteins in 84 species: Archae - 0; Bacteria - 122; Metazoa - 0; Fungi - 0; Plants - 46; Viruses - 0; Other Eukaryotes - 124 (source: NCBI BLink).
AT2G46650	36	2	4	20	0.00193504	81	22	123	155	0.17468		ATCB5-C, B5 #1, CB5-C, cytochrome B5 isoform C
AT3G06470	151	26	26	116	9.75184e-07	3077	395	1911	976	0.000572736		GNS1/SUR4 membrane protein family
AT3G09190	21	0	4	16	0.0148197	0	0	1	2	1		Concanavalin A-like lectin family protein
AT3G22550	207	44	13	90	9.4854e-08	7399	757	1243	865	6.3464e-113		Protein of unknown function (DUF581)
AT3G24840	87	2	1	4	6.45522e-08	952	83	228	202	2.41495e-13		Sec14p-like phosphatidylinositol transfer family protein
AT3G29760	41	4	8	38	0.00251775	246	108	102	128	0.389407		Haloacid dehalogenase-like hydrolase (HAD) superfamily protein
AT3G45010	3512	96	42	186	2.6931e-277	35252	16628	13111	31604	0		SCPL48, SERINE CARBOXYPEPTIDASE-LIKE 48
AT3G56950	16	3	4	25	0.0350002	162	50	72	123	0.327444		SIP2;1, SMALL AND BASIC INTRINSIC PROTEIN 2;1
AT3G57010	52	8	4	19	0.00605305	189	62	36	64	0.140425		Calcium-dependent phosphotriesterase superfamily protein
AT3G57830	30	0	0	5	0.000156868	26	56	5	98	0.912686		Leucine-rich repeat protein kinase family protein
AT4G01360	37	1	0	26	1.81175e-06	292	75	160	176	1		BPS3, BYPASS 3,related to BYPASS1 (BPS1). Regulates production of mobile compound: bps signal.
AT4G02770	41	2	1	4	0.00157254	561	164	229	282	0.439794		PSAD-1, photosystem I subunit D-1
AT4G04955	728	21	4	17	5.46116e-59	5506	859	1462	1504	4.82562e-37		ALN, ATALN, allantoinase
AT4G15230	192	9	1	23	5.96188e-16	4858	2521	963	2766	0.00176837		ATPDR2, PDR2, pleiotropic drug resistance 2
AT4G15800	87	12	22	134	1.17545e-07	802	243	400	619	0.142861		RALFL33, ralf-like 33
AT4G17895	48	9	13	54	0.00584102	71	35	33	68	1		UBP20, ubiquitin-specific protease 20
AT4G24730	1064	102	13	314	3.54936e-71	151	44	67	99	0.523337		Calcineurin-like metallo-phosphoesterase superfamily protein
AT4G25870	79	13	11	48	0.000756408	338	70	218	209	0.641755		Core-2/I-branching beta-1,6-N-acetylglucosaminyltransferase family protein
AT4G28730	33	0	1	6	0.000349927	163	35	70	29	0.605553		Glutaredoxin family protein
AT4G30280	502	1	2	15	1.03169e-54	15379	771	12233	3207	0	Yes	ATXTH18, XTH18, xyloglucan endotransglucosylase/hydrolase 18
AT4G36880	5683	17	10	56	0	11987	4077	5502	10281	0		CP1, cysteine proteinase1
AT4G37470	104	20	29	127	2.65981e-05	519	65	480	515	0.498678		alpha/beta-Hydrolases superfamily protein
AT5G02440	41	2	1	20	6.24499e-05	355	98	50	59	0.0131488		unknown protein; Has 71 Blast hits to 71 proteins in 12 species: Archae - 0; Bacteria - 0; Metazoa - 0; Fungi - 0; Plants - 71; Viruses - 0; Other Eukaryotes - 0 (source: NCBI BLink).
AT5G17300	99	14	1	9	0.000117387	107	8	27	25	0.0137246		RVE1, Homeodomain-like superfamily protein
AT5G45740	17	2	0	7	0.0384516	5	3	11	4	0.0884629		Ubiquitin domain-containing protein
AT5G53110	44	6	2	9	0.010731	54	26	27	32	0.452437		RING/U-box superfamily protein
AT5G64120	52	8	2	12	0.00625565	328	235	352	814	0.7189		Peroxidase superfamily protein
AT5G64620	121	28	7	38	0.000716587	335	58	361	453	0.491843		ATC/VIF2, C/VIF2, cell wall / vacuolar inhibitor of fructosidase 2
AT5G67420	84	13	3	26	0.000152542	489	219	169	487	0.00552648		ASL39, LBD37, LOB domain-containing protein 37
Non Dormant specific MEGs
AT1G14580	86	12	35	138	2.08639e-05	199	35	42	221	5.69809e-11		C2H2-like zinc finger protein
AT1G35614	6	0	0	0	0.454545	15	0	0	74	9.76045e-11		unknown protein; BEST Arabidopsis thaliana protein match is: unknown protein (TAIR:AT1G35500.1); Has 6 Blast hits to 6 proteins in 2 species: Archae - 0; Bacteria - 0; Metazoa - 0; Fungi - 0; Plants - 6; Viruses - 0; Other Eukaryotes - 0 (source: NCBI BLink).
AT1G55650	0	0	0	0	1	6	0	0	42	3.40482e-06	Yes	HMG (high mobility group) box protein with ARID/BRIGHT DNA-binding domain
AT1G62120	80	15	64	74	0.922318	42	10	9	37	0.0248247		Mitochondrial transcription termination factor family protein
AT2G04135	0	0	0	0	1	9	0	0	7	0.0433815		transposable element gene
AT2G06002	24	3	10	29	0.113982	36	5	2	8	0.0218263		other RNA
AT2G14060	0	0	4	2	0.5671	33	0	0	5	7.09115e-05		S-adenosyl-L-methionine-dependent methyltransferases superfamily protein
AT2G14570	15	0	0	0	0.0421456	42	0	0	7	7.06492e-06		transposable element gene
AT2G22710	82	26	0	62	0.000134019	183	44	0	48	2.85248e-06		transposable element gene
AT2G24700	0	0	0	0	1	7	0	1	15	0.0117195		Transcriptional factor B3 family protein
AT2G26660	0	4	2	6	0.446965	17	1	2	14	0.0333118		ATSPX2, SPX2, SPX domain gene 2
AT2G31945	36	0	45	13	0.0530294	21	1	1	12	0.00569708		unknown protein; FUNCTIONS IN: molecular_function unknown; INVOLVED IN: biological_process unknown; LOCATED IN: endomembrane system; EXPRESSED IN: 8 plant structures; EXPRESSED DURING: 4 anthesis, petal differentiation and expansion stage; BEST Arabidopsis thaliana protein match is: unknown protein (TAIR:AT1G05575.1); Has 61 Blast hits to 61 proteins in 10 species: Archae - 0; Bacteria - 0; Metaz…
AT2G32140	0	0	0	0	1	9	0	0	7	0.0433815		transmembrane receptors
AT2G37820	0	0	0	0	1	5	0	0	13	0.0190616		Cysteine/Histidine-rich C1 domain family protein
AT2G43990	0	0	1	2	1	7	1	1	17	0.0384516		unknown protein; FUNCTIONS IN: molecular_function unknown; INVOLVED IN: biological_process unknown; LOCATED IN: chloroplast; EXPRESSED IN: 9 plant structures; EXPRESSED DURING: 6 growth stages; Has 1419 Blast hits to 494 proteins in 144 species: Archae - 0; Bacteria - 300; Metazoa - 246; Fungi - 102; Plants - 31; Viruses - 2; Other Eukaryotes - 738 (source: NCBI BLink).
AT3G04080	5	0	1	2	0.569231	7	0	1	13	0.0448253		APY1, ATAPY1, apyrase 1
AT3G10670	2	0	2	4	1	9	0	0	7	0.0433815		ATNAP7, NAP7, non-intrinsic ABC protein 7
AT3G13277	58	50	23	54	0.280148	15	0	1	12	0.0115997		other RNA
AT3G15351	54	28	21	28	0.605662	45	10	4	18	0.029364		unknown protein; Has 50 Blast hits to 50 proteins in 16 species: Archae - 0; Bacteria - 0; Metazoa - 7; Fungi - 0; Plants - 43; Viruses - 0; Other Eukaryotes - 0 (source: NCBI BLink).
AT3G43835	0	0	0	0	1	23	3	0	27	0.000424096		transposable element gene
AT3G44730	83	22	67	45	0.111723	29	1	0	13	0.00032334		ATKP1, KP1, kinesin-like protein 1
AT3G44980	0	0	0	0	1	39	9	0	8	0.0319371		unknown protein; BEST Arabidopsis thaliana protein match is: unknown protein (TAIR:AT2G07215.1); Has 2 Blast hits to 2 proteins in 1 species: Archae - 0; Bacteria - 0; Metazoa - 0; Fungi - 0; Plants - 2; Viruses - 0; Other Eukaryotes - 0 (source: NCBI BLink).
AT3G48131	15	0	0	0	0.0421456	257	51	15	68	1.66626e-07		unknown protein; LOCATED IN: endomembrane system; Has 30201 Blast hits to 17322 proteins in 780 species: Archae - 12; Bacteria - 1396; Metazoa - 17338; Fungi - 3422; Plants - 5037; Viruses - 0; Other Eukaryotes - 2996 (source: NCBI BLink).
AT3G55485	7	0	20	10	0.0998124	12	0	0	5	0.0184043		AT3G55485
AT3G55605	10	3	8	8	1	11	0	0	5	0.0433815		Mitochondrial glycoprotein family protein
AT3G61740	7	2	3	9	0.733718	17	0	0	7	0.00389809		ATX3, SDG14, SET domain protein 14
AT4G10695	8	17	3	23	0.680722	11	0	4	33	0.00481978		CDC68-related
AT4G23170	8	0	0	1	0.205882	7	0	0	7	0.0203704		CRK9, EP1, receptor-like protein kinase-related family protein
AT5G01260	71	13	80	19	0.0010004	69	15	1	11	0.011948		Carbohydrate-binding-like fold
AT5G09760	8	2	28	8	0.0032786	67	10	0	13	0.000335504		Plant invertase/pectin methylesterase inhibitor superfamily
AT5G18960	32	11	33	44	0.684869	54	7	12	51	0.00114206		FRS12, FAR1-related sequence 12
AT5G24105	0	0	0	0	1	64	1	1	5	1.41098e-06		AGP41, arabinogalactan protein 41
AT5G24240	42	13	0	52	0.000287269	163	29	0	103	3.53643e-12		ATPI4Kγ3, localizes to the nucleus and has autophosphorylation activity, but no lipid kinase activity.
AT5G35425	0	0	0	0	1	97	7	1	20	3.83271e-08		transposable element gene
AT5G60260	34	32	22	72	0.906368	39	8	4	23	0.0146694		unknown protein; Has 1807 Blast hits to 1807 proteins in 277 species: Archae - 0; Bacteria - 0; Metazoa - 736; Fungi - 347; Plants - 385; Viruses - 0; Other Eukaryotes - 339 (source: NCBI BLink).
AT5G63080	55	17	12	37	0.154223	58	10	4	20	0.00569926		JMJ20, JUMONJI DOMAIN-CONTAINING PROTEIN 20
MEGs, Common in Dormant and Non dormant
AT1G48280	1126	86	16	141	3.79946e-67	3065	156	9	151	2.5694e-213		hydroxyproline-rich glycoprotein family protein
AT2G01422	271	4	21	703	9.43225e-83	128	3	54	375	1.57191e-21		At2g01422
AT2G11983	12	0	1	12	0.0124231	32	3	1	16	0.00273716		Pseudogene of AT3G17910; SURF1 (SURFEIT 1)
AT2G24340	82	2	0	23	1.13235e-10	40	0	0	7	6.55105e-06		sequence-specific DNA binding transcription factors
AT3G43350	94	12	0	25	1.79641e-06	46	5	0	10	0.00133949		transposable element gene
AT3G45820	538	32	0	64	2.63592e-40	126	2	2	8	9.62628e-12		unknown protein; Has 1 Blast hits to 1 proteins in 1 species: Archae - 0; Bacteria - 0; Metazoa - 0; Fungi - 0; Plants - 1; Viruses - 0; Other Eukaryotes - 0 (source: NCBI BLink).
AT4G00220	432	44	5	297	2.4677e-43	67	6	2	36	1.49678e-06	Yes	JLO, LBD30, Lateral organ boundaries (LOB) domain family protein
AT4G06748	518	43	9	264	9.11893e-47	415	39	2	155	4.23875e-33		pseudogene, hypothetical protein
AT4G08430	42	1	0	130	7.77284e-19	28	1	0	82	9.0982e-12		Ulp1 protease family protein
AT4G25530	12	0	0	28	3.81842e-05	40	0	0	122	5.40375e-19	Yes	FWA, HDG6, FLOWERING WAGENINGEN
AT5G03090	554	108	13	917	1.35965e-76	1188	84	32	400	9.94596e-89		BEST Arabidopsis thaliana protein match is: mto 1 responding down 1 (TAIR:AT1G53480.1); Has 7 Blast hits to 7 proteins in 1 species: Archae - 0; Bacteria - 0; Metazoa - 0; Fungi - 0; Plants - 7; Viruses - 0; Other Eukaryotes - 0 (source: NCBI BLink).
AT5G28200	596	3	0	32	3.21346e-67	343	0	0	11	4.66129e-41		transposable element gene
AT5G35375	376	6	4	95	4.12949e-42	206	4	2	63	2.07626e-24		unknown protein; FUNCTIONS IN: molecular_function unknown; INVOLVED IN: biological_process unknown; LOCATED IN: cellular_component unknown; Has 1 Blast hits to 1 proteins in 1 species: Archae - 0; Bacteria - 0; Metazoa - 0; Fungi - 0; Plants - 1; Viruses - 0; Other Eukaryotes - 0 (source: NCBI BLink).
AT5G41830	301	49	0	210	7.36264e-25	756	28	0	356	1.98555e-94	Yes	RNI-like superfamily protein

## Sheet: PEG
Figure 2-source data 2. Imprinted genes in endosperm of mature seed
	ColxCvi_Dormant		CvixCol_Dormant			ColxCvi_Non Dormant		CvixCol_Non Dormant
gene	Col_reads	Cvi_reads	Col_reads	Cvi_reads	p-value of fisher's exact test	Col_reads	Cvi_reads	Col_reads	Cvi_reads	p-value of fisher's exact test	pignatta et al. (2014)	annotation
Dormant specific PEGs
At1g28620	10	36	13	7	4.22292e-06	3	7	4	3	0.169354		pseudogene, lipase, similar to lipase Arab-1 GB:S68410 GI:2129636 (Arabidopsis thaliana); blastp match of 44% identity and 1.2e-48 P-value to GP|7523500|dbj|BAA94228.1||AP001633 unnamed protein product {Oryza sativa (japonica cultivar-group)}
At1g60410	0	6	18	9	0.00278795	0	0	0	0	1		F-box family protein
AT1G65370	6	11	60	11	1.85835e-10	6	2	10	3	0.214603		TRAF-like family protein
Non Dormant specific PEGs
At1g22710	4	3	0	0	1	2	4	42	15	8.43849e-06	Yes	ATSUC2, SUC2, SUT1, sucrose-proton symporter 2
At3g11020	131	21	123	66	0.0219468	4	6	43	18	2.88494e-05		DREB2, DREB2B, DRE/CRT-binding protein 2B
At3g16430	11	0	8	0	0.737428	5	14	19	8	0.000195819		JAL31, jacalin-related lectin 31
At3g58360	0	0	1	1	1	1	8	41	9	4.74988e-08		TRAF-like family protein
At3g58370	0	0	0	0	1	6	17	66	12	2.55178e-12		TRAF-like family protein
At5g51590	0	3	26	2	7.12372e-07	2	14	21	4	3.83322e-06		AT hook motif DNA-binding family protein
PEGs, Common in Dormant and Non dormant
At1g57800	25	64	224	9	6.34797e-52	17	190	352	54	3.69163e-93	Yes	ORTH3, VIM5, zinc finger (C3HC4-type RING finger) family protein
At1g59890	5	28	40	14	3.55285e-09	23	78	93	19	4.49213e-23	Yes	SNL5, SIN3-like 5
