# Supplementary material for: Dormancy-specific imprinting underlies maternal inheritance of seed dormancy in Arabidopsis thaliana
Source: eLife journal article supplement (doi:10.7554/elife.19573), 2016-12-22
Supplement: supp [file elife-19573-supp-v1.zip › elife_poa_e19573_Figure_2_source_data_4.xlsx]

## Sheet: Sheet1
Figure 2-source data 4.mRNA expression of MEGs in the testa+endosperm and endosperm samples
gene_id	gene	testa+endosperm_FPKM	endosperm_FPKM	log2(fold_change)	p_value	q_value
AT1G04540	AT1G04540	0.0191368	0.0525717	1.45794	1	1
AT1G05000	AT1G05000	8.13475	9.89996	0.283325	0.37065	0.999533
AT1G10150	AT1G10150	8.56186	7.36552	-0.217136	0.45545	0.999533
AT1G14580	AT1G14580	10.8084	11.2887	0.0627255	0.8233	0.999533
AT1G23360	MENG	5.90973	6.38988	0.112697	0.742	0.999533
AT1G28670	ARAB-1	1.86702	1.81519	-0.0406167	0.9293	0.999533
AT1G29630	AT1G29630	1.99066	1.76866	-0.170593	0.6312	0.999533
AT1G35614	AT1G35614	0	0	0	1	1
AT1G36922	AT1G36922	2.65008	3.00239	0.180075	0.73415	0.999533
AT1G37160	AT1G37160	0.181572	0.399083	1.13615	0.13015	0.999533
AT1G48280	AT1G48280	2.4704	1.95466	-0.33783	0.3517	0.999533
AT1G50350	AT1G50350	7.41622	8.01081	0.111263	0.8089	0.999533
AT1G55650	AT1G55650	0	0	0	1	1
AT1G62120	AT1G62120	2.26604	1.87604	-0.272484	0.4959	0.999533
AT1G62200	AT1G62200	0.94556	0.975713	0.0452874	0.91815	0.999533
AT1G67650	AT1G67650	9.66057	8.23921	-0.229603	0.39625	0.999533
AT1G72930	TIR	0.36986	0.348595	-0.085427	0.9132	0.999533
AT1G73220	AtOCT1	2.09534	1.97137	-0.0879866	0.97075	0.999533
AT1G78670	ATGGH3	0.226759	0.233442	0.0419033	1	1
AT1G80880	AT1G80880	1.35755	1.52784	0.170483	0.68455	0.999533
AT2G01422	AT2G01422	17.6532	20.7007	0.229752	0.43165	0.999533
AT2G03760	ST1	0.0732442	0.0406133	-0.850762	1	1
AT2G04135	AT2G04135	0.0262168	0.106589	2.02349	1	1
AT2G06002	AT2G06002	29.1658	25.3978	-0.199575	0.47885	0.999533
AT2G10260	AT2G10260	6.85505	7.52788	0.135077	0.652	0.999533
AT2G11983	AT2G11983	0.080867	0.0797026	-0.0209243	1	1
AT2G14060	AT2G14060	0.213578	0.123546	-0.789711	1	1
AT2G14570	AT2G14570	0.408341	0.595247	0.543712	0.36815	0.999533
AT2G15940	AT2G15940	1.27164	1.44198	0.181366	0.665	0.999533
AT2G16660	AT2G16660	105.123	63.84	-0.719545	0.00955	0.375293
AT2G18980	AT2G18980	0	0	0	1	1
AT2G22710	AT2G22710	2.55647	2.93229	0.197876	0.62265	0.999533
AT2G24340	AT2G24340	1.52054	0.796089	-0.933585	0.08905	0.999533
AT2G24700	AT2G24700	0	0	0	1	1
AT2G25220	AT2G25220	0.302155	0.410396	0.441729	0.49325	0.999533
AT2G26570	WEB1	10.0375	13.1802	0.392962	0.13805	0.999533
AT2G26660	ATSPX2	32.7892	30.011	-0.127729	0.62595	0.999533
AT2G27970	CKS2	0.357989	0.20995	-0.769868	1	1
AT2G28550	TOE1	0.301603	0.130771	-1.20561	0.0912	0.999533
AT2G31945	AT2G31945	20.7122	40.1873	0.956259	0.00305	0.170672
AT2G32140	AT2G32140	0.418608	1.0243	1.29097	0.03275	0.759089
AT2G33760	AT2G33760	1.92627	1.71856	-0.164608	0.6787	0.999533
AT2G37820	AT2G37820	0.142674	0.147161	0.0446815	1	1
AT2G38400	AGT3	15.3984	15.3042	-0.00885735	0.9732	0.999533
AT2G39890	PROT1	26.308	22.5499	-0.222378	0.3836	0.999533
AT2G43945	AT2G43945	15.587	14.5428	-0.100033	0.71825	0.999533
AT2G43990	AT2G43990	0.605199	0.744576	0.29901	0.53545	0.999533
AT2G46650	B5 #1	1.84795	1.03738	-0.832982	0.13875	0.999533
AT3G04080	ATAPY1	12.0464	12.0298	-0.001991	0.99365	0.999533
AT3G06470	AT3G06470	7.57655	5.19781	-0.543638	0.1076	0.999533
AT3G09190	AT3G09190	0.585947	0.529968	-0.144865	0.81255	0.999533
AT3G10670	ATNAP7	45.6204	46.1579	0.0168981	0.94855	0.999533
AT3G13277	AT3G13277	18.5562	16.9369	-0.131733	0.6236	0.999533
AT3G15351	AT3G15351	56.6811	54.2692	-0.0627358	0.8081	0.999533
AT3G22550	AT3G22550	7.6484	6.71566	-0.187628	0.5464	0.999533
AT3G24840	AT3G24840	4.10113	6.3027	0.619946	0.04245	0.875831
AT3G29760	AT3G29760	3.86339	3.81714	-0.0173775	0.9565	0.999533
AT3G43350	AT3G43350	0.277645	0.229152	-0.27694	1	1
AT3G43835	AT3G43835	0.0268933	0.00299146	-3.16833	1	1
AT3G44730	KP1	7.51251	9.92779	0.402178	0.12705	0.999533
AT3G44980	AT3G44980	0	0	0	1	1
AT3G45010	scpl48	0.162377	0.15167	-0.0984133	1	1
AT3G45820	AT3G45820	0.725173	0	-inf	1	1
AT3G48131	AT3G48131	0	0	0	1	1
AT3G55485	AT3G55485	6.90456	3.83946	-0.846645	0.07035	0.999533
AT3G55605	AT3G55605	42.3337	35.7925	-0.242149	0.35225	0.999533
AT3G56950	SIP2	9.01684	7.53903	-0.258244	0.4151	0.999533
AT3G57010	AT3G57010	4.77153	7.27215	0.607929	0.0632	0.999533
AT3G57830	AT3G57830	0.0404037	0.0192402	-1.07036	1	1
AT3G61740	ATX3	5.71917	7.143	0.320722	0.2323	0.999533
AT4G00220	LBD30	56.6288	52.8022	-0.10094	0.69385	0.999533
AT4G01360	AT4G01360	8.61069	9.43548	0.131967	0.65385	0.999533
AT4G02770	PSAD-1	0.824254	0.75763	-0.121597	0.84515	0.999533
AT4G04955	ATALN	31.3942	31.6045	0.00963476	0.97035	0.999533
AT4G06748	AT4G06748	3.91963	4.86367	0.311327	0.34275	0.999533
AT4G08430	AT4G08430	1.4086	1.60123	0.184914	0.62965	0.999533
AT4G10695	AT4G10695	1.39321	1.26183	-0.142899	0.8063	0.999533
AT4G15230	ATPDR2	0.275878	0.325206	0.237322	0.61935	0.999533
AT4G15800	RALFL33	129.984	147.165	0.179101	0.49885	0.999533
AT4G17895	UBP20	9.91208	9.29089	-0.0933707	0.73095	0.999533
AT4G23170	EP1	0.720929	0.489859	-0.557491	0.37235	0.999533
AT4G24730	AT4G24730	32.5392	29.2834	-0.152097	0.5557	0.999533
AT4G25530	FWA	0.186307	0.170081	-0.131466	1	1
AT4G25870	AT4G25870	0.675411	0.391769	-0.785763	0.17625	0.999533
AT4G28730	AT4G28730	0.223003	0.31285	0.488409	1	1
AT4G30280	ATXTH18	74.892	91.6691	0.291624	0.2574	0.999533
AT4G36880	CP1	121.445	83.596	-0.538793	0.0437	0.88273
AT4G37470	AT4G37470	1.16749	0.824036	-0.502637	0.3133	0.999533
AT5G01260	AT5G01260	0.49077	1.1574	1.23776	0.022	0.61854
AT5G02440	AT5G02440	0.382084	0.156245	-1.29008	1	1
AT5G03090	AT5G03090	75.4706	75.0282	-0.00848029	0.97865	0.999533
AT5G09760	AT5G09760	0.827773	0.885426	0.0971369	0.83105	0.999533
AT5G17300	RVE1	3.65992	3.7166	0.0221693	0.94435	0.999533
AT5G18960	FRS12	7.76678	8.22986	0.0835513	0.75685	0.999533
AT5G24105	AGP41	0.0466536	0.0370089	-0.334116	1	1
AT5G24240	AT5G24240	23.4143	26.5255	0.179993	0.48575	0.999533
AT5G28200	AT5G28200	1.43597	1.92329	0.421547	0.23285	0.999533
AT5G35375	AT5G35375	73.3928	85.7325	0.224203	0.40225	0.999533
AT5G35425	AT5G35425	0.0202213	0.0597905	1.56404	1	1
AT5G41830	AT5G41830	8.7031	10.7562	0.30557	0.29885	0.999533
AT5G45740	AT5G45740	0.921374	0.385111	-1.25851	0.3225	0.999533
AT5G53110	AT5G53110	0.812077	0.813868	0.00317835	0.9806	0.999533
AT5G60260	AT5G60260	0.742842	2.34084	1.6559	0.08615	0.999533
AT5G63080	AT5G63080	8.78845	8.59396	-0.0322858	0.911	0.999533
AT5G64120	AT5G64120	5.03771	3.74091	-0.429378	0.23395	0.999533
AT5G64620	ATC/VIF2	11.6687	8.98371	-0.377256	0.2838	0.999533
AT5G67420	LBD37	50.4964	39.0819	-0.369679	0.24485	0.999533
