# Supplementary material for: Dormancy-specific imprinting underlies maternal inheritance of seed dormancy in Arabidopsis thaliana
Source: eLife journal article supplement (doi:10.7554/elife.19573), 2016-12-22
Supplement: supp [file elife-19573-supp-v1.zip › elife_poa_e19573_Figure_2_source_data_5.xlsx]

## Sheet: Sheet1
Figure 2-source data 5. Resequence of amplicons containing SNPs.
			ColxCvi_Dormant			CvixCol_Dormant			ColxCvi_Non Dormant			CvixCol_Non Dormant
Gene	chromosome	SNP position	Col_reads	Cvi_reads	Ratio od maternal reads	Col_reads	Cvi_reads	Ratio od maternal reads	Col_reads	Cvi_reads	Ratio od maternal reads	Col_reads	Cvi_reads	Ratio od maternal reads		annotation
AT2G03760	chr2	1149709	3416	0	1	19	6944	0.997271	6968	3054	0.69527	3435	2257	0.396521	Dormant specific MEGs	AtSOT1, AtSOT12, ATST1, RAR047, SOT12, ST, ST1, sulphotransferase 12
AT2G18980	chr2	8233786	3166	2	0.999369	21	8116	0.997419	4645	2207	0.677904	1043	5353	0.836929	Dormant specific MEGs	Peroxidase superfamily protein
AT2G38400	chr2	16083913	3147	0	1	5	10615	0.999529	4437	1579	0.737533	797	3215	0.801346	Dormant specific MEGs	AGT3, alanine:glyoxylate aminotransferase 3
AT3G57010	chr3	21096275	1766	4	0.99774	24	10042	0.997616	6262	2157	0.743794	1517	4400	0.74362	Dormant specific MEGs	Calcium-dependent phosphotriesterase superfamily protein
AT4G04955	chr4	2522807	2943	10	0.996614	7	6175	0.998868	15753	7509	0.677199	3039	14200	0.823714	Dormant specific MEGs	ALN, ATALN, allantoinase
AT4G15230	chr4	8685183	860	0	1	101	1903	0.949601	1629	893	0.645916	260	1173	0.818562	Dormant specific MEGs	ATPDR2, PDR2, pleiotropic drug resistance 2
AT4G36880	chr4	17375047	4494	7	0.998445	16	8426	0.998105	14855	5748	0.721012	7143	13254	0.649801	Dormant specific MEGs	CP1, cysteine proteinase1
AT4G37470	chr4	17618085	6766	915	0.880875	173	2853	0.942829	1047	69	0.938172	422	517	0.550586	Dormant specific MEGs	alpha/beta-Hydrolases superfamily protein
AT5G64120	chr5	25659465	6242	52	0.991738	204	1446	0.876364	809	805	0.501239	514	1240	0.706956	Dormant specific MEGs	Peroxidase superfamily protein
AT5G64620	chr5	25832120	29921	516	0.983047	13	9641	0.998653	11612	6818	0.63006	3206	16235	0.835091	Dormant specific MEGs	ATC/VIF2, C/VIF2, cell wall / vacuolar inhibitor of fructosidase 2
AT1G14580	chr1	4992111	8870	3267	0.730823	1028	19196	0.949169	7027	866	0.890283	783	3895	0.832621	Non Dormant specific MEGs	C2H2-like zinc finger protein
AT2G31945	chr2	13581942	2940	1113	0.725389	1124	4388	0.796081	3409	275	0.925353	7	1878	0.996286	Non Dormant specific MEGs	unknown protein; FUNCTIONS IN: molecular_function unknown; INVOLVED IN: biological_process unknown; LOCATED IN: endomembrane system; EXPRESSED IN: 8 plant structures; EXPRESSED DURING: 4 anthesis, petal differentiation and expansion stage; BEST Arabidopsis thaliana protein match is: unknown protein (TAIR:AT1G05575.1); Has 61 Blast hits to 61 proteins in 10 species: Archae - 0; Bacteria - 0; Metaz…
AT2G37820	chr2	15848047	105	153	0.406977	70	1245	0.946768	492	124	0.798701	558	5161	0.90243	Non Dormant specific MEGs	Cysteine/Histidine-rich C1 domain family protein
AT5G35425	chr5	13659974	0	0	-	0	0	-	2385	155	0.938976	2	492	0.995951	Non Dormant specific MEGs	transposable element gene
AT5G60260	chr5	24255733	2768	1743	0.613611	8	12500	0.99936	4242	838	0.835039	3	712	0.995804	Non Dormant specific MEGs	unknown protein; Has 1807 Blast hits to 1807 proteins in 277 species: Archae - 0; Bacteria - 0; Metazoa - 736; Fungi - 347; Plants - 385; Viruses - 0; Other Eukaryotes - 339 (source: NCBI BLink).
AT4G00220	chr4	91853	9916	525	0.949717	22	7740	0.997166	1218	43	0.9659	6	1635	0.996344	MEGs, Common in Dormant and Non dormant	JLO, LBD30, Lateral organ boundaries (LOB) domain family protein
AT4G25530	chr4	13041740	7957	12	0.998494	235	15208	0.984783	478	11	0.977505	2	447	0.995546	MEGs, Common in Dormant and Non dormant	FWA, HDG6, FLOWERING WAGENINGEN
AT3G58370	chr3	21596383	258	0	1	1562	1850	0.542204	165	1517	0.0980975	245	0	0	Non Dormant specific PEGs	TRAF-like family protein
AT1G57800	chr1	21409153	0	801	0	1549	620	0.285846	368	1412	0.206742	978	142	0.126786	PEGs, Common in Dormant and Non dormant	ORTH3, VIM5, zinc finger (C3HC4-type RING finger) family protein
