# Supplementary material for: Dormancy-specific imprinting underlies maternal inheritance of seed dormancy in Arabidopsis thaliana
Source: eLife journal article supplement (doi:10.7554/elife.19573), 2016-12-22
Supplement: supp [file elife-19573-supp-v1.zip › elife_poa_e19573_Figure_2_source_data_6.xlsx]

## Sheet: Sheet1
Figure 2-source data 6. mRNA expression of dormancy- specific MEGs
gene	ColxCvi_FPKM	Col_FPKM	CvixCol_FPKM	Cvi_FPKM	Col/ColxCvi_foldchange(log2)	CvixCol/ColxCvi_foldchange(log2)	Cvi/ColxCvi_foldchange(log2)	cluster	annotation
AT1G10150	2.18268	31.4928	1.85202	1.18626	3.85085	-0.237003	-0.879677	1	Carbohydrate-binding protein
AT1G28670	10.0078	165.815	0.331018	0.174332	4.05037	-4.91808	-5.84315	1	ARAB-1, GDSL-like Lipase/Acylhydrolase superfamily protein
AT1G62200	2.73238	27.946	1.53549	2.20547	3.35441	-0.831456	-0.30907	1	Major facilitator superfamily protein
AT1G73220	458.345	32.0517	2.25695	2.21287	3.83796	-3.82796	-3.85641	1	ATOCT1, OCT1, ORGANIC CATION/CARNITINE TRANSPORTER1
AT1G78670	15.508	264.725	0.525057	0.553047	4.09341	-4.88439	-4.80947	1	ATGGH3, GGH3, gamma-glutamyl hydrolase 3
AT2G03760	0.70461	14.7093	0.392082	0.18772	4.38376	-0.845669	-1.90825	1	AtSOT1, AtSOT12, ATST1, RAR047, SOT12, ST, ST1, sulphotransferase 12
AT2G16660	10.8111	126.677	4.47298	6.78347	3.55057	-1.2732	-0.672419	1	Major facilitator superfamily protein
AT2G18980	6.81529	162.671	3.4612	1.45828	4.57703	-0.977504	-2.22451	1	Peroxidase superfamily protein
AT2G25220	1.89226	14.8928	0.49125	0.404253	2.97644	-1.94558	-2.22678	1	Protein kinase superfamily protein
AT2G28550	1.95999	11.1671	0.750304	1.11931	2.51034	-1.3853	-0.808233	1	RAP2.7, TOE1, related to AP2.7
AT2G38400	10.5325	87.8183	3.71844	3.89166	3.05967	-1.50208	-1.43639	1	AGT3, alanine:glyoxylate aminotransferase 3
AT2G39890	15.366	137.369	4.51602	4.1112	3.16025	-1.76662	-1.90211	1	ATPROT1, PROT1, proline transporter 1
AT2G46650	4.08417	56.3045	3.36593	0.963412	3.78514	-0.279039	-2.08382	1	ATCB5-C, B5 #1, CB5-C, cytochrome B5 isoform C
AT3G22550	20.0234	84.6867	7.36199	9.52876	2.08045	-1.44352	-1.07133	1	Protein of unknown function (DUF581)
AT3G24840	1.07368	7.74283	0.230833	0.430557	2.8503	-2.21764	-1.31828	1	Sec14p-like phosphatidylinositol transfer family protein
AT3G45010	1210.56	98.822	6.39355	1.35103	3.6147	-3.95014	-6.1927	1	SCPL48, SERINE CARBOXYPEPTIDASE-LIKE 48
AT3G56950	21.4728	5.68721	5.5022	5.23207	1.91672	-0.0477131	-0.12034	1	SIP2;1, SMALL AND BASIC INTRINSIC PROTEIN 2;1
AT4G01360	3.81466	100.744	1.79244	0.846034	4.723	-1.08963	-2.17277	1	BPS3, BYPASS 3,related to BYPASS1 (BPS1). Regulates production of mobile compound: bps signal.
AT4G02770	20.7162	545.544	0.842179	0.341182	4.71887	-4.62049	-5.92407	1	PSAD-1, photosystem I subunit D-1
AT4G04955	13.6082	162.326	1.03914	2.14998	3.57634	-3.71102	-2.66209	1	ALN, ATALN, allantoinase
AT4G15230	6.46265	126.371	0.811692	3.41985	4.2894	-2.99312	-0.918196	1	ATPDR2, PDR2, pleiotropic drug resistance 2
AT4G30280	8.56848	270.852	0.622029	0.188997	4.98232	-3.78398	-5.50261	1	ATXTH18, XTH18, xyloglucan endotransglucosylase/hydrolase 18
AT4G36880	829.123	21063.8	7.95118	1.04688	4.66703	-6.70427	-9.62935	1	CP1, cysteine proteinase1
AT5G02440	3.63468	22.641	1.34974	0.841793	2.63904	-1.42914	-2.11029	1	unknown protein; Has 71 Blast hits to 71 proteins in 12 species: Archae - 0; Bacteria - 0; Metazoa - 0; Fungi - 0; Plants - 71; Viruses - 0; Other Eukaryotes - 0 (source: NCBI BLink).
AT5G17300	4.23488	7.64558	0.946889	1.27867	0.852303	-2.16105	-1.72767	1	RVE1, Homeodomain-like superfamily protein
AT5G67420	4.18887	39.4909	1.45742	0.543083	3.23689	-1.52314	-2.94732	1	ASL39, LBD37, LOB domain-containing protein 37
AT1G04540	0.432374	1.25903	1.16506	1.17495	1.54196	1.43006	1.44225	2	Calcium-dependent lipid-binding (CaLB domain) family protein
AT1G05000	6.77015	93.0843	13.247	5.11696	3.78128	0.968405	-0.403902	2	Phosphotyrosine protein phosphatases superfamily protein
AT1G23360	4.21079	6.88628	3.11015	3.71693	0.709635	-0.437107	-0.179977	2	MENG, S-adenosyl-L-methionine-dependent methyltransferases superfamily protein
AT1G29630	1.96097	1.23503	1.99866	4.51136	-0.667024	0.0274664	1.20199	2	5'-3' exonuclease family protein
AT1G36922	1.17614	1.10084	0.144493	3.80489	-0.0954666	-3.02499	1.69379	2	unknown protein.
AT1G50350	1.87882	4.10321	4.15474	5.77418	1.12693	1.14493	1.61979	2	BEST Arabidopsis thaliana protein match is: RING/U-box superfamily protein (TAIR:AT3G19950.1); Has 37 Blast hits to 37 proteins in 10 species: Archae - 0; Bacteria - 0; Metazoa - 0; Fungi - 0; Plants - 37; Viruses - 0; Other Eukaryotes - 0 (source: NCBI BLink).
AT1G67650	1.65006	1.82792	2.79688	4.16985	0.147684	0.7613	1.33748	2	SRP72 RNA-binding domain
AT1G72930	2.34196	3.14253	6.31961	2.97315	0.424211	1.43212	0.344276	2	TIR, toll/interleukin-1 receptor-like
AT1G80880	0.880748	0.498683	0.869629	1.40353	-0.820607	-0.0183293	0.672257	2	Tetratricopeptide repeat (TPR)-like superfamily protein
AT2G10260	1.29419	5.79055	0.276356	0.800475	-2.16165	-4.3891	-2.85477	2	Ulp1 protease family protein
AT2G15940	1.32062	0.991424	0.970075	2.08719	-0.413643	-0.445049	0.660344	2	transposable element gene
AT2G26570	4.01307	21.6789	4.26413	3.38606	2.43351	0.0875467	-0.245098	2	WEB1, WEAK CHLOROPLAST MOVEMENT UNDER BLUE LIGHT 1. maintains the chloroplast photorelocation movement velocity
AT2G27970	2.66821	2.18519	1.72094	3.62536	-0.288112	-0.632676	0.442251	2	CKS2, CDK-subunit 2
AT2G33760	0.358197	0.260759	0.847108	1.01394	-0.458037	1.24179	1.50114	2	Pentatricopeptide repeat (PPR) superfamily protein
AT2G43945	6.15845	28.3438	4.98226	5.1652	2.2024	-0.305769	-0.253743	2	unknown protein; LOCATED IN: chloroplast; BEST Arabidopsis thaliana protein match is: unknown protein (TAIR:AT3G59870.1); Has 292 Blast hits to 292 proteins in 84 species: Archae - 0; Bacteria - 122; Metazoa - 0; Fungi - 0; Plants - 46; Viruses - 0; Other Eukaryotes - 124 (source: NCBI BLink).
AT3G06470	6.17631	91.3652	6.0832	6.33576	3.88683	-0.0219137	0.0367726	2	GNS1/SUR4 membrane protein family
AT3G09190	3.20572	0.558055	3.43604	4.83964	-2.52217	0.100102	0.594254	2	Concanavalin A-like lectin family protein
AT3G29760	2.58855	10.6074	1.48405	2.52124	2.03485	-0.802601	-0.0380139	2	Haloacid dehalogenase-like hydrolase (HAD) superfamily protein
AT3G57010	12.4298	23.9734	6.76776	5.20483	0.947634	-0.877051	-1.25588	2	Calcium-dependent phosphotriesterase superfamily protein
AT3G57830	0.464923	0.927066	0.312903	0.572193	0.995681	-0.571275	0.299511	2	Leucine-rich repeat protein kinase family protein
AT4G15800	14.9765	194.516	24.1488	19.7293	3.69912	0.689252	0.39764	2	RALFL33, ralf-like 33
AT4G17895	5.69919	7.42188	5.84507	6.85932	0.381027	0.0364631	0.267308	2	UBP20, ubiquitin-specific protease 20
AT4G25870	2.09002	4.37104	1.88875	4.45215	1.06446	-0.146085	1.09099	2	Core-2/I-branching beta-1,6-N-acetylglucosaminyltransferase family protein
AT4G28730	1.37918	4.60663	0.488375	0.826729	1.7399	-1.49775	-0.738321	2	Glutaredoxin family protein
AT4G37470	14.1173	48.8697	15.8007	28.5336	1.79148	0.162529	1.0152	2	alpha/beta-Hydrolases superfamily protein
AT5G45740	1.45522	1.19179	1.56431	1.6477	-0.288112	0.10429	0.179217	2	Ubiquitin domain-containing protein
AT5G53110	1.95485	3.99082	1.42529	1.87659	1.02963	-0.455798	-0.0589429	2	RING/U-box superfamily protein
AT5G64120	26.4328	578.399	6.80095	70.5643	4.45167	-1.95852	1.41661	2	Peroxidase superfamily protein
AT5G64620	9.57022	26.5802	3.22048	7.65592	1.47373	-1.57128	-0.321977	2	ATC/VIF2, C/VIF2, cell wall / vacuolar inhibitor of fructosidase 2
AT1G37160	1.53642	0.12276	0.354489	0.509162	-3.64566	-2.11576	-1.59337	3	transposable element gene
AT4G24730	86.4186	20.1904	22.2254	33.1307	-2.09767	-1.95913	-1.38317	3	Calcineurin-like metallo-phosphoesterase superfamily protein
