# Supplementary material for: Dormancy-specific imprinting underlies maternal inheritance of seed dormancy in Arabidopsis thaliana
Source: eLife journal article supplement (doi:10.7554/elife.19573), 2016-12-22
Supplement: supp [file elife-19573-supp-v1.zip › elife_poa_e19573_Figure_2_source_data_7.xlsx]

## Sheet: MEG_D
Figure 2-source data 7. Expression of MEGs in response to cold treatment during seed development
gene	Col22C_FPKM	Col10C_FPKM	Col10C/Col22C_foldchange(log2)	test_stat	p_value	q_value	cluster
AT1G04540	0.539915	0.150246	-1.8454	0	1	1	2
AT1G05000	20.0218	0	-inf	-nan	0.09225	0.2052	2
AT1G10150	4.72422	1.33649	-1.82162	-3.85425	5e-05	0.000333525	1
AT1G23360	4.98385	4.71164	-0.0810302	-0.159774	0.7851	0.855131	2
AT1G28670	42.526	1.89466	-4.48833	-10.6261	5e-05	0.000333525	1
AT1G29630	0.418993	0.228319	-0.875878	0	1	1	2
AT1G36922	0.935361	2.69882	1.52873	1.84593	0.074	0.173692	2
AT1G37160	0.0913592	0	-inf	0	1	1	3
AT1G50350	4.29687	4.20367	-0.0316353	-0.067754	0.9547	0.970496	2
AT1G62200	10.2389	0.475609	-4.42814	-6.36021	5e-05	0.000333525	1
AT1G67650	1.2321	1.45139	0.236314	0.442528	0.4836	0.613125	2
AT1G72930	4.97374	0.7647	-2.70137	-2.54918	0.10265	0.221949	2
AT1G73220	166.979	19.6457	-3.08738	-6.47056	5e-05	0.000333525	1
AT1G78670	56.7393	3.25924	-4.12174	-11.2632	5e-05	0.000333525	1
AT1G80880	0.516825	1.55732	1.59132	2.14352	0.0047	0.0183578	2
AT2G03760	5.73241	0	-inf	-nan	5e-05	0.000333525	1
AT2G10260	1.4178	1.5287	0.108654	0.165609	0.77385	0.846965	2
AT2G15940	0.323348	0.418267	0.371338	0	1	1	2
AT2G16660	116.171	11.0903	-3.38888	-11.4281	5e-05	0.000333525	1
AT2G18980	11.565	0.184009	-5.97384	-4.47874	0.03025	0.0859637	1
AT2G25220	8.52047	0.289146	-4.88106	-4.80175	0.1018	0.220617	1
AT2G26570	3.51948	3.64509	0.0505916	0.140064	0.8202	0.880306	2
AT2G27970	0.725243	0.366256	-0.985613	0	1	1	2
AT2G28550	1.79897	1.44e-05	-16.9265	-0.00286081	0.2493	0.396559	1
AT2G33760	0.500168	1.84057	1.87967	2.62844	0.0014	0.00652138	2
AT2G38400	50.9292	3.18794	-3.9978	-3.73388	5e-05	0.000333525	1
AT2G39890	63.0895	2.97562	-4.40614	-4.30298	5e-05	0.000333525	1
AT2G43945	12.7076	3.06955	-2.04959	-5.37483	5e-05	0.000333525	2
AT2G46650	35.9619	2.62621	-3.77542	-8.74095	5e-05	0.000333525	1
AT3G06470	18.1872	2.50859	-2.85797	-6.97536	5e-05	0.000333525	2
AT3G09190	0.865553	3.33456	1.9458	3.03182	0.0005	0.00267552	2
AT3G22550	36.9875	6.64119	-2.47753	-8.2319	5e-05	0.000333525	1
AT3G24840	1.66264	0.614679	-1.43557	-2.34458	0.0012	0.00570633	1
AT3G29760	3.77959	0.907402	-2.05842	-3.83968	5e-05	0.000333525	2
AT3G45010	268.384	15.8818	-4.07885	-12.5763	5e-05	0.000333525	1
AT3G56950	10.0284	4.92157	-1.0269	-1.80005	0.00295	0.0123701	1
AT3G57010	9.86935	1.42268	-2.79434	-5.83024	5e-05	0.000333525	2
AT3G57830	1.03783	0.0707859	-3.87396	0	1	1	2
AT4G01360	66.0107	11.4581	-2.52633	-9.03626	5e-05	0.000333525	1
AT4G02770	67.5147	3.71003	-4.1857	-11.4153	5e-05	0.000333525	1
AT4G04955	35.0502	2.88031	-3.60513	-10.2949	5e-05	0.000333525	1
AT4G15230	14.0423	0.372119	-5.23787	-9.94076	5e-05	0.000333525	1
AT4G15800	70.2705	13.2661	-2.40517	-9.49449	5e-05	0.000333525	2
AT4G17895	4.48038	3.66884	-0.288299	-0.804204	0.19795	0.348008	2
AT4G24730	2.49598	1.66711	-0.582261	-0.334007	0.53295	0.655547	3
AT4G25870	2.56919	0.34897	-2.88014	-3.3096	0.00105	0.00508652	2
AT4G28730	1.97133	0.229847	-3.10042	-2.06997	0.05545	0.138752	2
AT4G30280	107.663	4.10759	-4.71209	-13.4915	5e-05	0.000333525	1
AT4G36880	2493	125.377	-4.31354	-13.412	5e-05	0.000333525	1
AT4G37470	22.6853	1.92045	-3.56225	-8.42471	5e-05	0.000333525	2
AT5G02440	7.42261	0	-inf	-nan	5e-05	0.000333525	1
AT5G17300	0.864086	1.29418	0.582796	0.900903	0.1707	0.315332	1
AT5G45740	1.15932	0	-inf	0	1	1	2
AT5G53110	2.98322	0.440213	-2.7606	-3.24074	0.0015	0.00692227	2
AT5G64120	57.0909	2.67377	-4.41631	-11.5024	5e-05	0.000333525	2
AT5G64620	25.491	5.84503	-2.1247	-6.22783	5e-05	0.000333525	2
AT5G67420	11.4354	0.797718	-3.84148	-6.93537	5e-05	0.000333525	1

## Sheet: MEG_ND
gene	Col22C_FPKM	Col10C_FPKM	Col10C/Col22C_foldchange(log2)	test_stat	p_value	q_value
AT1G14580	6.39425	4.9989	-0.355164	-0.913025	0.11345	0.238051
AT1G35614	0	0.97188	inf	0	1	1
AT1G55650	0	0	0	0	1	1
AT1G62120	2.0959	1.84064	-0.187361	-0.371553	0.58	0.69588
AT2G04135	0.0286272	0.491814	4.10266	0	1	1
AT2G06002	7.14366	8.27065	0.211337	0.582305	0.4717	0.603048
AT2G14060	0.10179	0.599236	2.55753	0	1	1
AT2G14570	0.111217	0.340439	1.61402	0	1	1
AT2G22710	0.635557	0.139045	-2.19247	0	1	1
AT2G24700	0.0120879	0	-inf	0	1	1
AT2G26660	18.8856	10.4214	-0.857735	-2.89692	5e-05	0.000333525
AT2G31945	4.34925	4.94103	0.184048	0.406827	0.6558	0.756557
AT2G32140	0.776638	0.147953	-2.39211	0	1	1
AT2G37820	1.33625	0.170001	-2.97457	-1.84728	0.05975	0.147093
AT2G43990	0.65565	0.223688	-1.55144	0	1	1
AT3G04080	15.8507	5.59405	-1.50258	-4.81408	5e-05	0.000333525
AT3G10670	21.5772	19.8655	-0.119247	-0.4457	0.4938	0.621961
AT3G13277	2.9026	3.82941	0.399777	0.95541	0.1552	0.295526
AT3G15351	15.2259	16.422	0.1091	0.266694	0.6417	0.74547
AT3G43835	0.0241627	0	-inf	0	1	1
AT3G44730	0.648905	3.83568	2.5634	5.34934	5e-05	0.000333525
AT3G44980	0	0	0	0	1	1
AT3G48131	0	0	0	0	1	1
AT3G55485	1.38703	9.36349	2.75505	4.46189	0.00145	0.00672276
AT3G55605	7.70129	19.1486	1.31407	4.20836	5e-05	0.000333525
AT3G61740	1.98093	3.54125	0.838076	2.13701	0.0003	0.00170354
AT4G10695	0.444414	1.34094	1.59327	0	1	1
AT4G23170	0.226715	0	-inf	0	1	1
AT5G01260	0.478622	0.45467	-0.0740641	0	1	1
AT5G09760	1.30867	0.740213	-0.822092	-1.27469	0.05155	0.131053
AT5G18960	6.83879	10.3428	0.596814	1.98364	0.0017	0.00771092
AT5G24105	0.0917017	0	-inf	0	1	1
AT5G24240	5.63796	2.8898	-0.964204	-2.44471	5e-05	0.000333525
AT5G35425	0	0	0	0	1	1
AT5G60260	1.71193	0	-inf	0	1	1
AT5G63080	4.76165	3.46929	-0.456822	-1.13671	0.08765	0.197487
