# Supplementary material for: Dormancy-specific imprinting underlies maternal inheritance of seed dormancy in Arabidopsis thaliana
Source: eLife journal article supplement (doi:10.7554/elife.19573), 2016-12-22
Supplement: supp [file elife-19573-supp-v1.zip › elife_poa_e19573_Figure_4_figure_supplement_7.pdf]

Mother (*cp1/CP1*)

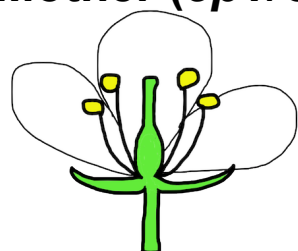

Central cell  
(*cp1/CP1*)

Father (*CP1/CP1*)

Sperm cell  
(*CP1*)

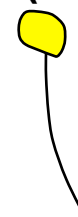

I F1 seeds

Endosperm: *CP1/CP1/CP1*

Embryo: *CP1/CP1*

Testa: *cp1/CP1*

OR

II F1 seeds

Endosperm: *cp1/cp1/CP1*

Testa: *cp1/CP1*

Embryo: *CP1/cp1*

Dry after-ripening time

Short

Long

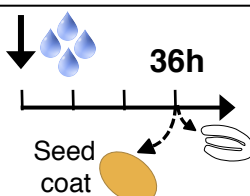

I

*CP1* RNA  
levels per  
parental  
allele

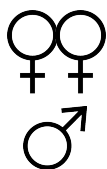

protein  
levels

CRUs

++

-

++

II

*CP1* RNA  
levels per  
parental  
allele

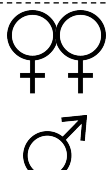

protein  
levels

CRUs

-

-

+++++

Fig.4-figure supplement 7
