# Supplementary material for: Dormancy-specific imprinting underlies maternal inheritance of seed dormancy in Arabidopsis thaliana
Source: eLife journal article supplement (doi:10.7554/elife.19573), 2016-12-22
Supplement: supp [file elife-19573-supp-v1.zip › elife_poa_e19573_Supplementary_file2.xlsx]

## Sheet: Sheet1
Supplementary file 2. Primers used in this study
primer name	sequence	experiment
CP1_F	GAGCCGTTAACCCCATCAAA	qRT-PCR
CP1_R	TCGAAAACGCCCAACAACTT	qRT-PCR
PP2A_F	GGACCGGAGCCAACTAGGA	qRT-PCR
PP2A_R	GCTATCCGAACTTCTGCCTCATT	qRT-PCR
CP1_89F	TCGTCGTGTCATTAGCCTCC	RT-PCR followed by sanger and MiSeq sequencing
CP1_403R	TTCTTGCCCCGAGGTACAAC	RT-PCR followed by sanger and MiSeq sequencing
ALN_1167F	CTTGAAAGCTTGGGGTGGGA	RT-PCR followed by sanger and MiSeq sequencing
ALN_1460F	GTCGAAACCACTTTGCCTGA	RT-PCR followed by sanger and MiSeq sequencing
ABCG30_3122F	GGTTGTTTGCACGATCCACC	RT-PCR followed by sanger and MiSeq sequencing
ABCG30_3353R	TCCAAGTTTTTCCTCTGCAGA	RT-PCR followed by sanger and MiSeq sequencing
JLO_359F	AAGCTCGTCTCAGAGACCCT	RT-PCR followed by sanger and MiSeq sequencing
JLO_619R	CCCAAGTGGAGGACATGACC	RT-PCR followed by sanger and MiSeq sequencing
FWA_1693F	GTGAATGAGCCTGGTGAGCT	RT-PCR followed by sanger and MiSeq sequencing
FWA_1882R	TGTTTCCATGGCGTTTTGCT	RT-PCR followed by sanger and MiSeq sequencing
VIM5_1519F	AGGGAAGCCATAAAGTCGGC	RT-PCR followed by sanger and MiSeq sequencing
VIM5_1753R	GGCAACAAGGGCACTTCATG	RT-PCR followed by sanger and MiSeq sequencing
AGT3_F	GATCGGTGCAAAACATTTCC	RT-PCR followed by sanger and MiSeq sequencing
AGT3_R	CGGTTTCCGATAGAGACAGAA	RT-PCR followed by sanger and MiSeq sequencing
SOT12_F	CGAGAATCCGAACAAGGTCT	RT-PCR followed by sanger and MiSeq sequencing
SOT12_R	TCCATCCTCCAATCTCTCCTT	RT-PCR followed by sanger and MiSeq sequencing
AT2G18980_F	CCGGTAGAGCTAGGGAGGAG	RT-PCR followed by sanger and MiSeq sequencing
AT2G18980_R	GTCGGATCAATTGGACGTTT	RT-PCR followed by sanger and MiSeq sequencing
VIF2_F	AAATCCGACCCAAGAAGTCC	RT-PCR followed by sanger and MiSeq sequencing
VIF2_R	CATGCATGGAGGCATAGTCA	RT-PCR followed by sanger and MiSeq sequencing
PRX71_F	GGTGTGGTTACCGGAGCTAA	RT-PCR followed by sanger and MiSeq sequencing
PRX71_R	TTTTCATCAACCCACTTTTGG	RT-PCR followed by sanger and MiSeq sequencing
At3g57010_F	TGAAGAAGAAAGAGGCCAAAG	RT-PCR followed by sanger and MiSeq sequencing
At3g57010_R	CAATGTAATGCGACCCAGAA	RT-PCR followed by sanger and MiSeq sequencing
KAI2_F	GATTACCGCGTCGTCCTCTA	RT-PCR followed by sanger and MiSeq sequencing
KAI2_R	TCTCGGAGAAGCAGAGATCA	RT-PCR followed by sanger and MiSeq sequencing
At1g14580_F	AGGTGTTCCTTCTCTGTTCACC	RT-PCR followed by sanger and MiSeq sequencing
At1g14580_R	GGTGCTCACAATTCCTCCAT	RT-PCR followed by sanger and MiSeq sequencing
At2g06002_F	GTCCGGTAGGTTTGCTGGT	RT-PCR followed by sanger and MiSeq sequencing
At2g06002_R	TTCAGCCCTTCAAAACCAAG	RT-PCR followed by sanger and MiSeq sequencing
At2g31945_F	CGAGGGTTTTTGCTAGATCG	RT-PCR followed by sanger and MiSeq sequencing
At2g31945_R	AATGCCGTGTAGTTGTTCTTG	RT-PCR followed by sanger and MiSeq sequencing
At2g37820_F	TTTGACGTGCATCCTCTCTG	RT-PCR followed by sanger and MiSeq sequencing
At2g37820_R	GGTTGTCCACCTTGTTGCTT	RT-PCR followed by sanger and MiSeq sequencing
At3g44980_F	CGGCTACGGTGGAGAGATAC	RT-PCR followed by sanger and MiSeq sequencing
At3g44980_R	CACCTTGCGATTCAAAGACA	RT-PCR followed by sanger and MiSeq sequencing
At3g55485_F	CTCATGGGATGGAGGAAAAA	RT-PCR followed by sanger and MiSeq sequencing
At3g55485_R	CCGACATTTTCATGGAATCA	RT-PCR followed by sanger and MiSeq sequencing
At3g61740_F	AGTTGTGCACACACCCTCAG	RT-PCR followed by sanger and MiSeq sequencing
At3g61740_R	CTTGGTCCCTTAAGCCTGTG	RT-PCR followed by sanger and MiSeq sequencing
At5g35425_F	ATGCATTTCTTGCCTTTCCA	RT-PCR followed by sanger and MiSeq sequencing
At5g35425_R	ACTCTCGGGTCTCCACTTCA	RT-PCR followed by sanger and MiSeq sequencing
At5g60260_F	GGGGAAAACGGAGATGAGTT	RT-PCR followed by sanger and MiSeq sequencing
At5g60260_R	CCATCGCCATAAAAAGGAAA	RT-PCR followed by sanger and MiSeq sequencing
At1g28620_F	TCCAACTGGATGTTCTGCTG	RT-PCR followed by sanger and MiSeq sequencing
At1g28620_R	CGGAATAAGAAAGGGCAACA	RT-PCR followed by sanger and MiSeq sequencing
At3g58360_F	TCCCAAGGGAAATAATGTTGA	RT-PCR followed by sanger and MiSeq sequencing
At3g58360_R	CAGAAACCCGCTATCTTTGG	RT-PCR followed by sanger and MiSeq sequencing
At3g58370_F	TGCTGGGTATCTTGTGAACG	RT-PCR followed by sanger and MiSeq sequencing
At3g58370_R	GGAAGAACTTGAAACCCATTGA	RT-PCR followed by sanger and MiSeq sequencing
FWA-GFP_F1	AGGCGCACTGCTTATCAAAC	RT-PCR
FWA-GFP_R1	CTGAACTTGTGGCCGTTCAC	RT-PCR
ACT11_F2	AATGGTTAAGGCTGGATTTGCTG	RT-PCR
ACT11_R2	GGTTGAGAGGAGCCTCAGTG	RT-PCR
