# Supplementary material for: Dormancy-specific imprinting underlies maternal inheritance of seed dormancy in Arabidopsis thaliana
Source: eLife journal article supplement (doi:10.7554/elife.19573), 2016-12-22
Supplement: supp [file elife-19573-supp-v1.zip › elife_poa_e19573_Supplementary_file3.txt]

chromosome	position
chr1	7361
chr1	8191
chr1	23235
chr1	26041
chr1	26089
chr1	27265
chr1	29757
chr1	30356
chr1	31515
chr1	35856
chr1	37072
chr1	37686
chr1	46355
chr1	47577
chr1	48181
chr1	49042
chr1	50371
chr1	63515
chr1	63526
chr1	63527
chr1	63644
chr1	63645
chr1	63757
chr1	63759
chr1	63915
chr1	72521
chr1	72756
chr1	72894
chr1	72929
chr1	72956
chr1	73047
chr1	73213
chr1	73386
chr1	73467
chr1	74169
chr1	74515
chr1	74541
chr1	74771
chr1	75721
chr1	75793
chr1	75899
chr1	76106
chr1	76188
chr1	76268
chr1	76847
chr1	76879
chr1	86799
chr1	86820
chr1	87060
chr1	87069
chr1	87072
chr1	89312
chr1	89638
chr1	89639
chr1	89644
chr1	89654
chr1	89754
chr1	90571
chr1	93207
chr1	94295
chr1	95225
chr1	95386
chr1	97547
chr1	97606
chr1	97610
chr1	97843
chr1	98215
chr1	98543
chr1	98917
chr1	100267
chr1	100314
chr1	100370
chr1	100501
chr1	100600
chr1	100898
chr1	109472
chr1	109487
chr1	111321
chr1	114648
chr1	115566
chr1	115688
chr1	117004
chr1	117328
chr1	117329
chr1	117331
chr1	117375
chr1	117379
chr1	117592
chr1	117675
chr1	117787
chr1	117880
chr1	117955
chr1	117994
chr1	117997
chr1	118006
chr1	118039
chr1	118192
chr1	121343
chr1	121353
chr1	121936
chr1	122503
chr1	123313
chr1	125155
chr1	126445
chr1	126520
chr1	127093
chr1	127891
chr1	128116
chr1	128173
chr1	128182
chr1	129025
chr1	137008
chr1	137115
chr1	138608
chr1	144810
chr1	147220
chr1	147237
chr1	154679
chr1	155199
chr1	155442
chr1	155595
chr1	155626
chr1	155678
chr1	155679
chr1	155921
chr1	155984
chr1	157407
chr1	157974
chr1	158233
chr1	158305
chr1	158355
chr1	159806
chr1	159941
chr1	163681
chr1	163686
chr1	164638
chr1	165105
chr1	165397
chr1	172137
chr1	175681
chr1	176005
chr1	176008
chr1	176276
chr1	176800
chr1	176801
chr1	177112
chr1	177202
chr1	177232
chr1	177355
chr1	177400
chr1	177478
chr1	177559
chr1	177611
chr1	177741
chr1	177909
chr1	178070
chr1	178080
chr1	178094
chr1	178142
chr1	178153
chr1	178155
chr1	180172
chr1	180322
chr1	180336
chr1	180812
chr1	180987
chr1	181175
chr1	181202
chr1	181366
chr1	185783
chr1	186861
chr1	187735
chr1	188630
chr1	191372
chr1	191742
chr1	192020
chr1	192065
chr1	196649
chr1	196934
chr1	196940
chr1	197163
chr1	197205
chr1	197293
chr1	197324
chr1	197366
chr1	197462
chr1	197480
chr1	197624
chr1	197787
chr1	198030
chr1	198087
chr1	198329
chr1	198347
chr1	198376
chr1	198549
chr1	198654
chr1	200089
chr1	200130
chr1	200200
chr1	200205
chr1	201650
chr1	205157
chr1	205393
chr1	205710
chr1	207187
chr1	207196
chr1	207287
chr1	207308
chr1	210438
chr1	211861
chr1	212832
chr1	212996
chr1	219167
chr1	219685
chr1	220757
chr1	220860
chr1	220937
chr1	220968
chr1	223037
chr1	229189
chr1	230411
chr1	232428
chr1	233094
chr1	233852
chr1	235005
chr1	236889
chr1	238622
chr1	238645
chr1	238654
chr1	238752
chr1	240922
chr1	244174
chr1	244584
chr1	249645
chr1	249669
chr1	249795
chr1	249796
chr1	259795
chr1	260158
chr1	264185
chr1	264633
chr1	265010
chr1	265611
chr1	266159
chr1	266532
chr1	268852
chr1	269283
chr1	269642
chr1	270211
chr1	270458
chr1	270845
chr1	271050
chr1	271416
chr1	272101
chr1	272826
chr1	274629
chr1	275504
chr1	275624
chr1	275938
chr1	277613
chr1	277659
chr1	277847
chr1	278320
chr1	281313
chr1	281933
chr1	283155
chr1	283723
chr1	284094
chr1	284187
chr1	293388
chr1	294545
chr1	294704
chr1	294889
chr1	294913
chr1	296724
chr1	296785
chr1	296800
chr1	298614
chr1	299439
chr1	299440
chr1	300023
chr1	300024
chr1	300277
chr1	300509
chr1	300520
chr1	301504
chr1	303874
chr1	304281
chr1	304565
chr1	305362
chr1	305431
chr1	307266
chr1	313381
chr1	314506
chr1	317357
chr1	317402
chr1	317506
chr1	318255
chr1	319353
chr1	319962
chr1	319963
chr1	321016
chr1	321370
chr1	321615
chr1	321814
chr1	322374
chr1	323072
chr1	323483
chr1	325901
chr1	326964
chr1	326965
chr1	327241
chr1	327966
chr1	328445
chr1	331269
chr1	331930
chr1	332347
chr1	333482
chr1	334737
chr1	335990
chr1	338382
chr1	338744
chr1	339305
chr1	340022
chr1	340025
chr1	343294
chr1	343449
chr1	343711
chr1	344075
chr1	346008
chr1	346016
chr1	346123
chr1	346726
chr1	347128
chr1	347533
chr1	349310
chr1	351689
chr1	352391
chr1	352755
chr1	353031
chr1	353201
chr1	353491
chr1	354413
chr1	354473
chr1	359566
chr1	360504
chr1	360798
chr1	360888
chr1	361200
chr1	361859
chr1	362150
chr1	362184
chr1	362763
chr1	367150
chr1	373680
chr1	375346
chr1	375515
chr1	377973
chr1	378101
chr1	380454
chr1	381773
chr1	382531
chr1	383526
chr1	384584
chr1	384704
chr1	385243
chr1	386389
chr1	386622
chr1	387871
chr1	387876
chr1	390936
chr1	391637
chr1	392131
chr1	392654
chr1	393497
chr1	394129
chr1	394552
chr1	394628
chr1	394901
chr1	395445
chr1	395484
chr1	395878
chr1	398591
chr1	399654
chr1	400627
chr1	400970
chr1	401443
chr1	403944
chr1	404108
chr1	404997
chr1	405041
chr1	405652
chr1	406177
chr1	408495
chr1	408849
chr1	413335
chr1	413624
chr1	414477
chr1	414481
chr1	440781
chr1	441102
chr1	441105
chr1	441404
chr1	441434
chr1	441566
chr1	441907
chr1	441974
chr1	441998
chr1	442025
chr1	442046
chr1	442121
chr1	442130
chr1	442271
chr1	442283
chr1	443300
chr1	443310
chr1	443322
chr1	443513
chr1	443677
chr1	443940
chr1	444033
chr1	444180
chr1	444200
chr1	444250
chr1	444861
chr1	444912
chr1	444936
chr1	444960
chr1	445038
chr1	445505
chr1	445946
chr1	445982
chr1	446022
chr1	446096
chr1	448785
chr1	449560
chr1	455765
chr1	455839
chr1	456189
chr1	456355
chr1	456365
chr1	456370
chr1	456525
chr1	456528
chr1	456636
chr1	457024
chr1	457096
chr1	457261
chr1	457342
chr1	457788
chr1	462101
chr1	462154
chr1	462191
chr1	462214
chr1	462359
chr1	462554
chr1	462560
chr1	462572
chr1	462756
chr1	462789
chr1	463202
chr1	463278
chr1	463314
chr1	469995
chr1	471508
chr1	475022
chr1	475670
chr1	476544
chr1	477943
chr1	478050
chr1	478914
chr1	481208
chr1	481677
chr1	481764
chr1	481814
chr1	482521
chr1	482639
chr1	482966
chr1	483079
chr1	487641
chr1	488260
chr1	488388
chr1	488642
chr1	488645
chr1	488650
chr1	489526
chr1	489664
chr1	490223
chr1	490430
chr1	491327
chr1	492394
chr1	494025
chr1	495024
chr1	495164
chr1	497991
chr1	514658
chr1	514894
chr1	524735
chr1	525870
chr1	526350
chr1	526370
chr1	526998
chr1	527655
chr1	527711
chr1	527738
chr1	527756
chr1	527811
chr1	528048
chr1	528511
chr1	528514
chr1	528607
chr1	528715
chr1	528813
chr1	533647
chr1	538149
chr1	539994
chr1	553738
chr1	554596
chr1	554822
chr1	555251
chr1	555463
chr1	565714
chr1	566487
chr1	566579
chr1	566941
chr1	567211
chr1	567457
chr1	568924
chr1	569555
chr1	569781
chr1	571955
chr1	572053
chr1	572608
chr1	572643
chr1	572657
chr1	573659
chr1	574162
chr1	574385
chr1	574393
chr1	574454
chr1	574531
chr1	574550
chr1	574603
chr1	575623
chr1	576108
chr1	576109
chr1	576901
chr1	577323
chr1	579884
chr1	580152
chr1	581476
chr1	581955
chr1	581990
chr1	582038
chr1	582039
chr1	582136
chr1	584370
chr1	585101
chr1	585247
chr1	586941
chr1	587094
chr1	587199
chr1	587232
chr1	587243
chr1	587244
chr1	592468
chr1	592729
chr1	592867
chr1	592890
chr1	592939
chr1	593871
chr1	593981
chr1	594036
chr1	594051
chr1	594139
chr1	594141
chr1	594144
chr1	597319
chr1	599461
chr1	599486
chr1	599730
chr1	600201
chr1	600626
chr1	601083
chr1	602981
chr1	603128
chr1	603197
chr1	603297
chr1	603302
chr1	603336
chr1	603727
chr1	603732
chr1	603769
chr1	603792
chr1	603815
chr1	603851
chr1	603880
chr1	603906
chr1	603928
chr1	603944
chr1	603956
chr1	603994
chr1	604011
chr1	604028
chr1	604256
chr1	604260
chr1	605176
chr1	605542
chr1	605706
chr1	605711
chr1	605763
chr1	605786
chr1	609249
chr1	618452
chr1	619632
chr1	619730
chr1	621591
chr1	621789
chr1	622117
chr1	622471
chr1	622815
chr1	624350
chr1	627162
chr1	628630
chr1	630457
chr1	632899
chr1	635670
chr1	636788
chr1	636917
chr1	637074
chr1	637916
chr1	637952
chr1	638156
chr1	638536
chr1	638622
chr1	641486
chr1	641525
chr1	641627
chr1	641800
chr1	642088
chr1	642568
chr1	643429
chr1	644148
chr1	644974
chr1	645371
chr1	645420
chr1	645619
chr1	645641
chr1	645781
chr1	646603
chr1	647668
chr1	648156
chr1	650324
chr1	650855
chr1	651888
chr1	655833
chr1	656291
chr1	658767
chr1	659824
chr1	674586
chr1	674879
chr1	675177
chr1	678328
chr1	678747
chr1	681710
chr1	683186
chr1	685510
chr1	685533
chr1	685779
chr1	686224
chr1	686443
chr1	687977
chr1	690361
chr1	691127
chr1	691581
chr1	703327
chr1	703360
chr1	704095
chr1	712618
chr1	713682
chr1	714700
chr1	714923
chr1	716805
chr1	717161
chr1	718122
chr1	719087
chr1	721576
chr1	723966
chr1	725231
chr1	725514
chr1	727169
chr1	727379
chr1	730200
chr1	731965
chr1	732956
chr1	734839
chr1	735274
chr1	735907
chr1	736014
chr1	737482
chr1	737577
chr1	737717
chr1	740670
chr1	742491
chr1	743178
chr1	744025
chr1	746347
chr1	746377
chr1	747085
chr1	747178
chr1	747501
chr1	747822
chr1	747985
chr1	748115
chr1	748146
chr1	748253
chr1	748326
chr1	748360
chr1	748721
chr1	748949
chr1	751200
chr1	751913
chr1	752641
chr1	753117
chr1	753480
chr1	754020
chr1	754492
chr1	755250
chr1	756789
chr1	757164
chr1	757309
chr1	757832
chr1	757949
chr1	758123
chr1	758192
chr1	758566
chr1	758573
chr1	758581
chr1	758613
chr1	761468
chr1	762240
chr1	762833
chr1	762875
chr1	763952
chr1	764006
chr1	764301
chr1	764304
chr1	765431
chr1	765718
chr1	766108
chr1	766190
chr1	766776
chr1	767204
chr1	767816
chr1	767846
chr1	774077
chr1	775649
chr1	776241
chr1	777397
chr1	781497
chr1	783309
chr1	787071
chr1	792202
chr1	792362
chr1	794260
chr1	794740
chr1	795795
chr1	797197
chr1	801204
chr1	801616
chr1	801626
chr1	801699
chr1	802231
chr1	803319
chr1	803836
chr1	804120
chr1	804621
chr1	804969
chr1	805449
chr1	806148
chr1	806356
chr1	808962
chr1	809178
chr1	810708
chr1	811781
chr1	812120
chr1	812265
chr1	812574
chr1	812774
chr1	812877
chr1	813001
chr1	815482
chr1	815910
chr1	818672
chr1	818914
chr1	821063
chr1	821572
chr1	823059
chr1	828756
chr1	835394
chr1	841275
chr1	841281
chr1	843072
chr1	843388
chr1	843746
chr1	846217
chr1	846368
chr1	846926
chr1	847000
chr1	847139
chr1	847358
chr1	847477
chr1	847668
chr1	849147
chr1	852562
chr1	853481
chr1	861816
chr1	864587
chr1	866094
chr1	866278
chr1	867345
chr1	873420
chr1	874308
chr1	875742
chr1	875743
chr1	876184
chr1	876498
chr1	876816
chr1	877449
chr1	878912
chr1	879464
chr1	879670
chr1	879836
chr1	880587
chr1	880611
chr1	881739
chr1	883991
chr1	884978
chr1	885985
chr1	887158
chr1	890883
chr1	891460
chr1	892198
chr1	892266
chr1	893717
chr1	893865
chr1	894182
chr1	894202
chr1	895405
chr1	895470
chr1	896449
chr1	899035
chr1	899112
chr1	899134
chr1	900885
chr1	900958
chr1	904575
chr1	904586
chr1	905880
chr1	906150
chr1	906224
chr1	906405
chr1	907024
chr1	907117
chr1	910020
chr1	911098
chr1	911108
chr1	911634
chr1	911682
chr1	911746
chr1	911893
chr1	916833
chr1	916899
chr1	917083
chr1	917605
chr1	917956
chr1	918563
chr1	918574
chr1	919273
chr1	919309
chr1	920099
chr1	920243
chr1	922664
chr1	922673
chr1	923522
chr1	923812
chr1	924182
chr1	930980
chr1	931693
chr1	933682
chr1	935256
chr1	935304
chr1	935413
chr1	939379
chr1	939491
chr1	941352
chr1	942264
chr1	942364
chr1	943186
chr1	945240
chr1	945582
chr1	945659
chr1	946273
chr1	946809
chr1	947493
chr1	954559
chr1	954568
chr1	954782
chr1	954852
chr1	955189
chr1	955200
chr1	955224
chr1	955268
chr1	955304
chr1	955317
chr1	955335
chr1	955359
chr1	955381
chr1	955494
chr1	955557
chr1	955835
chr1	956147
chr1	957255
chr1	964190
chr1	977175
chr1	977558
chr1	977773
chr1	990085
chr1	991856
chr1	991978
chr1	992331
chr1	993877
chr1	993998
chr1	994290
chr1	995115
chr1	996526
chr1	997057
chr1	999493
chr1	1000114
chr1	1005087
chr1	1007891
chr1	1008105
chr1	1008868
chr1	1009378
chr1	1009534
chr1	1010024
chr1	1013305
chr1	1014380
chr1	1019184
chr1	1019424
chr1	1019431
chr1	1024793
chr1	1028593
chr1	1028632
chr1	1037224
chr1	1037249
chr1	1038813
chr1	1039279
chr1	1041055
chr1	1042319
chr1	1042322
chr1	1042428
chr1	1042886
chr1	1043076
chr1	1045981
chr1	1046741
chr1	1047041
chr1	1047153
chr1	1047179
chr1	1047241
chr1	1048359
chr1	1049014
chr1	1049661
chr1	1050342
chr1	1050371
chr1	1050377
chr1	1052905
chr1	1052968
chr1	1053055
chr1	1054725
chr1	1055617
chr1	1055657
chr1	1056492
chr1	1058087
chr1	1059555
chr1	1059568
chr1	1060135
chr1	1060585
chr1	1064708
chr1	1065037
chr1	1069851
chr1	1070461
chr1	1070727
chr1	1070893
chr1	1073201
chr1	1073941
chr1	1075693
chr1	1076505
chr1	1076923
chr1	1077510
chr1	1077730
chr1	1079383
chr1	1079608
chr1	1079949
chr1	1080239
chr1	1084594
chr1	1088438
chr1	1088933
chr1	1089125
chr1	1089175
chr1	1090144
chr1	1091710
chr1	1092026
chr1	1092328
chr1	1092868
chr1	1092888
chr1	1093165
chr1	1093171
chr1	1093415
chr1	1093442
chr1	1093567
chr1	1093696
chr1	1093854
chr1	1093881
chr1	1093947
chr1	1094402
chr1	1094918
chr1	1096053
chr1	1096128
chr1	1096185
chr1	1096892
chr1	1097097
chr1	1097402
chr1	1097814
chr1	1098053
chr1	1098118
chr1	1098311
chr1	1098317
chr1	1098653
chr1	1098763
chr1	1098825
chr1	1099063
chr1	1099159
chr1	1099174
chr1	1099222
chr1	1099228
chr1	1099243
chr1	1099798
chr1	1099810
chr1	1099818
chr1	1099824
chr1	1107223
chr1	1108465
chr1	1108492
chr1	1108534
chr1	1108545
chr1	1108552
chr1	1108559
chr1	1109510
chr1	1110391
chr1	1110911
chr1	1110912
chr1	1111666
chr1	1112015
chr1	1112521
chr1	1112557
chr1	1112560
chr1	1112599
chr1	1112606
chr1	1112748
chr1	1112908
chr1	1112929
chr1	1112947
chr1	1113287
chr1	1113354
chr1	1113685
chr1	1113750
chr1	1114531
chr1	1114803
chr1	1115603
chr1	1116274
chr1	1116487
chr1	1116814
chr1	1117158
chr1	1117760
chr1	1117828
chr1	1118936
chr1	1119000
chr1	1119009
chr1	1119117
chr1	1119502
chr1	1119662
chr1	1119712
chr1	1119760
chr1	1119772
chr1	1126079
chr1	1127445
chr1	1134644
chr1	1135459
chr1	1136317
chr1	1140683
chr1	1141454
chr1	1141459
chr1	1141663
chr1	1141821
chr1	1141858
chr1	1142026
chr1	1142972
chr1	1143832
chr1	1143895
chr1	1144061
chr1	1144293
chr1	1144374
chr1	1144388
chr1	1144395
chr1	1144396
chr1	1144431
chr1	1144622
chr1	1145010
chr1	1145073
chr1	1145145
chr1	1146649
chr1	1147966
chr1	1148023
chr1	1148101
chr1	1148115
chr1	1149464
chr1	1149753
chr1	1150031
chr1	1150931
chr1	1150961
chr1	1153177
chr1	1154544
chr1	1154943
chr1	1155026
chr1	1155173
chr1	1155218
chr1	1155292
chr1	1155443
chr1	1155448
chr1	1155536
chr1	1155545
chr1	1155593
chr1	1155601
chr1	1155605
chr1	1155740
chr1	1155854
chr1	1155869
chr1	1155940
chr1	1156916
chr1	1156919
chr1	1161650
chr1	1162324
chr1	1162910
chr1	1163523
chr1	1164056
chr1	1165282
chr1	1165444
chr1	1166520
chr1	1167305
chr1	1167844
chr1	1168048
chr1	1176724
chr1	1177912
chr1	1178065
chr1	1178252
chr1	1178349
chr1	1179391
chr1	1179960
chr1	1181940
chr1	1182175
chr1	1183153
chr1	1186131
chr1	1186604
chr1	1188426
chr1	1189060
chr1	1189375
chr1	1190336
chr1	1190703
chr1	1191238
chr1	1191281
chr1	1191308
chr1	1191741
chr1	1193354
chr1	1198429
chr1	1201049
chr1	1202259
chr1	1202376
chr1	1202451
chr1	1202547
chr1	1202871
chr1	1203145
chr1	1203417
chr1	1203627
chr1	1205599
chr1	1216597
chr1	1216599
chr1	1216750
chr1	1216752
chr1	1216753
chr1	1216790
chr1	1216821
chr1	1217026
chr1	1217034
chr1	1218002
chr1	1218274
chr1	1219320
chr1	1226654
chr1	1228638
chr1	1228908
chr1	1228923
chr1	1229125
chr1	1230006
chr1	1230021
chr1	1230313
chr1	1230476
chr1	1230609
chr1	1230611
chr1	1230645
chr1	1230823
chr1	1234740
chr1	1235897
chr1	1236953
chr1	1236958
chr1	1237070
chr1	1237241
chr1	1237291
chr1	1237312
chr1	1237438
chr1	1237468
chr1	1237495
chr1	1237514
chr1	1238041
chr1	1238107
chr1	1238179
chr1	1238210
chr1	1238329
chr1	1238782
chr1	1238794
chr1	1238833
chr1	1240481
chr1	1240512
chr1	1241208
chr1	1242550
chr1	1246101
chr1	1246182
chr1	1249094
chr1	1251100
chr1	1252247
chr1	1252557
chr1	1253047
chr1	1253643
chr1	1253963
chr1	1253964
chr1	1256505
chr1	1256718
chr1	1257430
chr1	1258691
chr1	1258726
chr1	1258735
chr1	1258774
chr1	1258784
chr1	1258830
chr1	1258886
chr1	1259070
chr1	1259468
chr1	1260329
chr1	1260345
chr1	1268742
chr1	1282410
chr1	1283604
chr1	1284321
chr1	1284528
chr1	1285177
chr1	1289228
chr1	1290815
chr1	1291559
chr1	1291603
chr1	1291664
chr1	1292594
chr1	1292729
chr1	1314763
chr1	1314997
chr1	1315765
chr1	1319112
chr1	1323364
chr1	1323367
chr1	1323811
chr1	1323912
chr1	1327977
chr1	1328351
chr1	1330502
chr1	1330504
chr1	1332630
chr1	1333146
chr1	1333467
chr1	1333474
chr1	1336687
chr1	1337020
chr1	1337350
chr1	1337359
chr1	1337389
chr1	1337738
chr1	1337776
chr1	1337777
chr1	1341292
chr1	1341597
chr1	1343461
chr1	1343510
chr1	1343534
chr1	1343672
chr1	1345520
chr1	1346144
chr1	1346398
chr1	1346459
chr1	1346699
chr1	1347853
chr1	1348386
chr1	1352251
chr1	1352311
chr1	1352559
chr1	1352793
chr1	1355211
chr1	1355409
chr1	1358332
chr1	1360126
chr1	1361415
chr1	1362813
chr1	1365093
chr1	1365473
chr1	1365738
chr1	1366822
chr1	1370275
chr1	1370836
chr1	1371005
chr1	1371306
chr1	1372650
chr1	1373380
chr1	1373430
chr1	1374074
chr1	1375352
chr1	1375473
chr1	1385956
chr1	1387695
chr1	1387889
chr1	1388160
chr1	1388552
chr1	1388633
chr1	1388956
chr1	1389380
chr1	1389786
chr1	1390208
chr1	1390503
chr1	1390629
chr1	1392197
chr1	1392290
chr1	1392958
chr1	1393031
chr1	1395425
chr1	1397466
chr1	1398240
chr1	1404899
chr1	1406569
chr1	1408306
chr1	1408410
chr1	1409400
chr1	1410376
chr1	1411395
chr1	1412261
chr1	1412394
chr1	1415335
chr1	1418718
chr1	1419647
chr1	1419963
chr1	1420073
chr1	1425604
chr1	1425813
chr1	1426278
chr1	1426287
chr1	1426358
chr1	1427919
chr1	1428240
chr1	1428267
chr1	1428291
chr1	1428565
chr1	1428570
chr1	1431611
chr1	1435402
chr1	1435452
chr1	1435519
chr1	1435558
chr1	1435573
chr1	1435587
chr1	1435846
chr1	1435854
chr1	1435867
chr1	1435960
chr1	1435979
chr1	1435980
chr1	1436068
chr1	1436338
chr1	1436602
chr1	1437298
chr1	1438309
chr1	1438466
chr1	1438617
chr1	1438625
chr1	1438872
chr1	1439442
chr1	1439444
chr1	1439568
chr1	1440531
chr1	1440538
chr1	1441110
chr1	1448928
chr1	1449289
chr1	1449313
chr1	1449373
chr1	1449445
chr1	1449487
chr1	1449493
chr1	1449592
chr1	1449607
chr1	1449755
chr1	1450753
chr1	1450793
chr1	1451114
chr1	1451260
chr1	1451309
chr1	1451316
chr1	1451466
chr1	1451716
chr1	1452123
chr1	1452268
chr1	1452568
chr1	1452588
chr1	1452729
chr1	1452754
chr1	1452758
chr1	1455033
chr1	1455052
chr1	1455101
chr1	1457479
chr1	1457738
chr1	1457806
chr1	1457976
chr1	1458063
chr1	1458325
chr1	1471412
chr1	1471441
chr1	1472223
chr1	1472551
chr1	1473286
chr1	1473843
chr1	1474983
chr1	1482728
chr1	1482743
chr1	1482897
chr1	1484255
chr1	1484382
chr1	1484414
chr1	1484443
chr1	1484826
chr1	1484891
chr1	1485291
chr1	1485357
chr1	1485393
chr1	1485396
chr1	1485411
chr1	1485504
chr1	1485507
chr1	1485573
chr1	1485582
chr1	1485591
chr1	1485642
chr1	1485692
chr1	1485850
chr1	1486503
chr1	1486507
chr1	1486509
chr1	1486530
chr1	1486566
chr1	1486579
chr1	1486839
chr1	1487542
chr1	1487602
chr1	1487605
chr1	1487685
chr1	1487862
chr1	1487874
chr1	1487928
chr1	1488402
chr1	1488822
chr1	1489200
chr1	1489236
chr1	1492237
chr1	1493521
chr1	1493872
chr1	1493908
chr1	1494147
chr1	1498549
chr1	1498827
chr1	1500228
chr1	1502440
chr1	1502479
chr1	1502480
chr1	1502518
chr1	1502896
chr1	1503744
chr1	1510014
chr1	1531793
chr1	1533358
chr1	1533536
chr1	1534298
chr1	1545170
chr1	1545309
chr1	1546099
chr1	1547245
chr1	1547262
chr1	1547593
chr1	1547701
chr1	1559037
chr1	1559682
chr1	1559701
chr1	1560760
chr1	1560806
chr1	1560864
chr1	1560936
chr1	1560963
chr1	1561032
chr1	1561396
chr1	1561423
chr1	1561498
chr1	1562403
chr1	1562650
chr1	1562674
chr1	1562683
chr1	1562790
chr1	1563048
chr1	1563176
chr1	1563207
chr1	1563459
chr1	1563930
chr1	1563967
chr1	1564058
chr1	1564783
chr1	1565351
chr1	1565360
chr1	1565599
chr1	1565881
chr1	1565909
chr1	1566050
chr1	1566146
chr1	1566150
chr1	1566445
chr1	1566457
chr1	1566620
chr1	1566906
chr1	1566911
chr1	1566942
chr1	1567072
chr1	1567212
chr1	1567259
chr1	1569430
chr1	1569615
chr1	1569622
chr1	1578543
chr1	1579126
chr1	1579214
chr1	1579220
chr1	1579543
chr1	1579670
chr1	1579727
chr1	1579994
chr1	1580134
chr1	1580237
chr1	1580913
chr1	1581606
chr1	1583365
chr1	1584466
chr1	1585517
chr1	1585637
chr1	1586236
chr1	1586313
chr1	1586415
chr1	1586966
chr1	1586980
chr1	1587500
chr1	1587612
chr1	1587660
chr1	1593965
chr1	1594407
chr1	1594436
chr1	1594587
chr1	1594594
chr1	1594628
chr1	1594669
chr1	1594672
chr1	1594750
chr1	1594867
chr1	1595328
chr1	1595693
chr1	1602446
chr1	1602782
chr1	1602829
chr1	1602866
chr1	1603055
chr1	1603057
chr1	1603067
chr1	1603157
chr1	1603223
chr1	1603341
chr1	1603459
chr1	1603471
chr1	1603662
chr1	1627287
chr1	1631049
chr1	1647756
chr1	1653737
chr1	1653831
chr1	1655859
chr1	1661550
chr1	1662071
chr1	1662147
chr1	1669720
chr1	1670227
chr1	1670564
chr1	1673295
chr1	1679787
chr1	1680254
chr1	1680572
chr1	1681196
chr1	1682478
chr1	1685203
chr1	1685204
chr1	1685417
chr1	1686725
chr1	1686860
chr1	1687323
chr1	1687700
chr1	1688098
chr1	1694193
chr1	1698662
chr1	1699068
chr1	1699680
chr1	1701334
chr1	1703147
chr1	1703232
chr1	1703238
chr1	1703332
chr1	1703338
chr1	1703345
chr1	1703448
chr1	1703601
chr1	1703618
chr1	1703785
chr1	1703828
chr1	1703850
chr1	1703982
chr1	1704008
chr1	1704033
chr1	1704418
chr1	1704592
chr1	1707803
chr1	1715143
chr1	1715580
chr1	1716094
chr1	1720138
chr1	1722315
chr1	1726650
chr1	1727376
chr1	1730549
chr1	1730739
chr1	1731568
chr1	1732562
chr1	1732585
chr1	1735201
chr1	1736913
chr1	1754684
chr1	1754691
chr1	1754766
chr1	1754824
chr1	1756362
chr1	1757291
chr1	1757429
chr1	1757830
chr1	1758052
chr1	1758219
chr1	1758749
chr1	1758936
chr1	1759721
chr1	1759812
chr1	1760027
chr1	1760764
chr1	1760788
chr1	1760964
chr1	1761571
chr1	1761579
chr1	1761734
chr1	1762556
chr1	1762735
chr1	1762881
chr1	1762889
chr1	1762893
chr1	1763005
chr1	1763024
chr1	1763176
chr1	1763249
chr1	1763374
chr1	1763657
chr1	1763684
chr1	1763703
chr1	1763896
chr1	1764052
chr1	1764730
chr1	1764963
chr1	1765203
chr1	1765893
chr1	1765962
chr1	1766161
chr1	1766167
chr1	1766594
chr1	1766735
chr1	1766781
chr1	1767073
chr1	1767986
chr1	1767989
chr1	1768046
chr1	1768061
chr1	1768585
chr1	1768613
chr1	1768619
chr1	1769131
chr1	1769267
chr1	1769357
chr1	1769438
chr1	1769477
chr1	1769480
chr1	1769546
chr1	1769824
chr1	1769878
chr1	1769893
chr1	1770094
chr1	1770121
chr1	1770145
chr1	1770478
chr1	1770723
chr1	1770752
chr1	1771260
chr1	1771686
chr1	1771693
chr1	1771721
chr1	1771735
chr1	1771952
chr1	1772107
chr1	1779397
chr1	1781121
chr1	1781352
chr1	1781691
chr1	1781938
chr1	1782827
chr1	1783041
chr1	1783667
chr1	1784481
chr1	1784565
chr1	1785006
chr1	1786088
chr1	1787656
chr1	1787834
chr1	1788010
chr1	1789045
chr1	1789091
chr1	1789092
chr1	1789653
chr1	1791005
chr1	1791428
chr1	1792351
chr1	1794786
chr1	1796539
chr1	1796587
chr1	1801238
chr1	1801243
chr1	1801405
chr1	1801520
chr1	1801739
chr1	1801744
chr1	1801768
chr1	1801775
chr1	1801870
chr1	1801890
chr1	1801930
chr1	1802328
chr1	1802393
chr1	1802417
chr1	1802715
chr1	1802802
chr1	1802820
chr1	1802911
chr1	1802927
chr1	1805018
chr1	1805805
chr1	1807984
chr1	1808166
chr1	1810556
chr1	1810920
chr1	1811231
chr1	1812678
chr1	1813512
chr1	1814707
chr1	1816263
chr1	1816413
chr1	1816928
chr1	1820417
chr1	1820995
chr1	1822645
chr1	1823370
chr1	1823574
chr1	1823593
chr1	1823692
chr1	1823810
chr1	1823846
chr1	1823847
chr1	1823962
chr1	1829395
chr1	1829416
chr1	1830662
chr1	1830882
chr1	1831576
chr1	1831751
chr1	1831978
chr1	1834956
chr1	1835691
chr1	1836334
chr1	1853452
chr1	1853809
chr1	1854679
chr1	1854903
chr1	1860077
chr1	1860605
chr1	1866136
chr1	1866650
chr1	1867445
chr1	1867912
chr1	1869453
chr1	1869474
chr1	1871709
chr1	1872355
chr1	1872356
chr1	1872801
chr1	1873606
chr1	1873609
chr1	1892934
chr1	1892983
chr1	1893083
chr1	1893175
chr1	1893373
chr1	1893881
chr1	1893917
chr1	1894025
chr1	1894664
chr1	1894926
chr1	1895258
chr1	1895438
chr1	1896864
chr1	1897550
chr1	1897860
chr1	1898073
chr1	1898102
chr1	1898167
chr1	1898194
chr1	1898207
chr1	1898683
chr1	1898864
chr1	1898932
chr1	1899040
chr1	1900064
chr1	1900076
chr1	1900241
chr1	1900279
chr1	1900363
chr1	1900380
chr1	1900413
chr1	1901189
chr1	1901838
chr1	1901883
chr1	1902039
chr1	1902116
chr1	1902117
chr1	1902492
chr1	1902513
chr1	1902872
chr1	1904141
chr1	1907517
chr1	1907518
chr1	1909776
chr1	1910382
chr1	1910630
chr1	1911981
chr1	1912430
chr1	1913288
chr1	1913764
chr1	1914581
chr1	1914610
chr1	1914650
chr1	1914925
chr1	1915228
chr1	1916835
chr1	1917375
chr1	1918033
chr1	1918122
chr1	1918262
chr1	1918379
chr1	1919345
chr1	1922451
chr1	1922519
chr1	1922617
chr1	1923025
chr1	1923117
chr1	1923122
chr1	1923667
chr1	1923685
chr1	1923812
chr1	1923827
chr1	1924405
chr1	1924418
chr1	1924908
chr1	1926065
chr1	1926113
chr1	1926172
chr1	1926176
chr1	1931040
chr1	1931079
chr1	1931101
chr1	1931526
chr1	1942847
chr1	1942857
chr1	1943947
chr1	1944861
chr1	1945239
chr1	1945258
chr1	1945261
chr1	1945495
chr1	1945684
chr1	1945753
chr1	1946909
chr1	1947329
chr1	1947530
chr1	1947572
chr1	1948050
chr1	1948384
chr1	1948576
chr1	1948831
chr1	1949289
chr1	1949374
chr1	1949449
chr1	1950032
chr1	1950375
chr1	1950573
chr1	1950580
chr1	1950582
chr1	1950598
chr1	1952008
chr1	1954006
chr1	1955269
chr1	1956153
chr1	1957834
chr1	1958396
chr1	1961062
chr1	1962112
chr1	1963020
chr1	1964926
chr1	1966701
chr1	1967163
chr1	1967481
chr1	1967732
chr1	1968247
chr1	1968771
chr1	1969083
chr1	1969492
chr1	1970041
chr1	1970596
chr1	1970705
chr1	1970920
chr1	1973736
chr1	1990126
chr1	1990399
chr1	1991356
chr1	1992763
chr1	1995128
chr1	1995260
chr1	1995528
chr1	1996005
chr1	2001535
chr1	2001851
chr1	2001936
chr1	2002180
chr1	2002368
chr1	2002650
chr1	2003322
chr1	2003346
chr1	2003730
chr1	2003930
chr1	2004321
chr1	2004386
chr1	2004509
chr1	2006584
chr1	2006788
chr1	2007836
chr1	2008270
chr1	2008399
chr1	2008420
chr1	2009337
chr1	2011096
chr1	2014234
chr1	2014386
chr1	2014561
chr1	2015000
chr1	2015165
chr1	2015253
chr1	2015312
chr1	2016047
chr1	2016091
chr1	2016428
chr1	2016602
chr1	2016618
chr1	2016809
chr1	2018109
chr1	2018395
chr1	2019322
chr1	2020863
chr1	2021689
chr1	2021725
chr1	2022553
chr1	2023386
chr1	2024006
chr1	2024352
chr1	2024623
chr1	2028408
chr1	2028689
chr1	2034244
chr1	2034282
chr1	2034537
chr1	2034541
chr1	2034595
chr1	2034833
chr1	2034902
chr1	2034973
chr1	2035384
chr1	2035385
chr1	2035406
chr1	2035524
chr1	2036034
chr1	2036109
chr1	2037024
chr1	2039999
chr1	2040690
chr1	2041183
chr1	2041377
chr1	2042276
chr1	2042834
chr1	2042988
chr1	2043332
chr1	2043365
chr1	2043645
chr1	2043667
chr1	2043804
chr1	2043875
chr1	2044453
chr1	2044519
chr1	2045513
chr1	2045595
chr1	2046322
chr1	2046455
chr1	2046510
chr1	2046567
chr1	2046750
chr1	2046823
chr1	2046824
chr1	2046855
chr1	2046902
chr1	2047261
chr1	2047361
chr1	2047384
chr1	2048421
chr1	2050326
chr1	2051086
chr1	2051561
chr1	2051689
chr1	2053467
chr1	2053655
chr1	2055895
chr1	2056573
chr1	2057285
chr1	2057286
chr1	2061564
chr1	2061744
chr1	2062367
chr1	2062711
chr1	2062810
chr1	2067580
chr1	2067846
chr1	2069359
chr1	2070388
chr1	2071377
chr1	2072864
chr1	2076796
chr1	2077522
chr1	2077675
chr1	2079964
chr1	2081226
chr1	2081411
chr1	2081469
chr1	2083636
chr1	2083668
chr1	2084774
chr1	2084792
chr1	2086288
chr1	2089775
chr1	2090931
chr1	2093677
chr1	2093900
chr1	2094112
chr1	2095017
chr1	2095951
chr1	2095992
chr1	2095996
chr1	2098333
chr1	2099083
chr1	2099592
chr1	2100197
chr1	2100398
chr1	2101565
chr1	2102346
chr1	2102674
chr1	2108698
chr1	2108745
chr1	2109509
chr1	2110777
chr1	2110817
chr1	2111791
chr1	2111945
chr1	2113854
chr1	2115427
chr1	2116231
chr1	2118976
chr1	2121072
chr1	2121574
chr1	2122071
chr1	2122370
chr1	2123284
chr1	2123328
chr1	2130629
chr1	2131431
chr1	2131587
chr1	2131756
chr1	2132555
chr1	2133633
chr1	2133655
chr1	2134905
chr1	2135267
chr1	2136666
chr1	2136713
chr1	2137228
chr1	2150219
chr1	2150428
chr1	2150683
chr1	2150965
chr1	2150969
chr1	2151193
chr1	2151764
chr1	2154971
chr1	2155296
chr1	2156958
chr1	2157039
chr1	2158682
chr1	2159061
chr1	2159062
chr1	2159190
chr1	2159384
chr1	2160682
chr1	2160726
chr1	2161795
chr1	2162346
chr1	2163216
chr1	2163253
chr1	2169066
chr1	2169138
chr1	2169997
chr1	2170039
chr1	2170759
chr1	2171818
chr1	2171846
chr1	2172235
chr1	2173760
chr1	2173894
chr1	2173902
chr1	2174014
chr1	2174546
chr1	2174562
chr1	2174694
chr1	2178333
chr1	2179050
chr1	2180682
chr1	2181118
chr1	2181491
chr1	2183092
chr1	2183105
chr1	2183499
chr1	2183852
chr1	2184685
chr1	2185722
chr1	2186167
chr1	2186804
chr1	2187230
chr1	2187464
chr1	2187672
chr1	2188593
chr1	2190009
chr1	2190062
chr1	2192031
chr1	2192375
chr1	2192780
chr1	2192788
chr1	2193020
chr1	2193246
chr1	2193257
chr1	2193539
chr1	2193694
chr1	2194456
chr1	2194461
chr1	2195287
chr1	2195344
chr1	2195714
chr1	2198009
chr1	2198174
chr1	2199472
chr1	2199671
chr1	2200514
chr1	2201141
chr1	2201180
chr1	2204704
chr1	2205974
chr1	2206303
chr1	2206608
chr1	2206617
chr1	2206835
chr1	2209436
chr1	2209840
chr1	2210405
chr1	2211523
chr1	2211764
chr1	2211975
chr1	2216192
chr1	2216831
chr1	2217183
chr1	2217339
chr1	2217657
chr1	2218099
chr1	2219268
chr1	2220322
chr1	2220491
chr1	2220710
chr1	2221599
chr1	2221993
chr1	2224173
chr1	2224423
chr1	2225242
chr1	2225417
chr1	2225425
chr1	2225852
chr1	2225969
chr1	2226159
chr1	2227192
chr1	2227252
chr1	2227273
chr1	2228289
chr1	2228744
chr1	2238162
chr1	2238609
chr1	2238668
chr1	2238673
chr1	2238694
chr1	2238722
chr1	2238723
chr1	2238783
chr1	2239053
chr1	2239185
chr1	2239236
chr1	2239248
chr1	2239536
chr1	2239539
chr1	2239548
chr1	2239581
chr1	2239599
chr1	2239629
chr1	2239698
chr1	2239710
chr1	2240023
chr1	2240443
chr1	2242353
chr1	2245776
chr1	2246037
chr1	2246148
chr1	2246776
chr1	2247306
chr1	2247508
chr1	2247522
chr1	2248004
chr1	2248213
chr1	2249210
chr1	2249360
chr1	2249537
chr1	2249552
chr1	2249679
chr1	2249681
chr1	2249693
chr1	2249699
chr1	2257506
chr1	2257631
chr1	2258040
chr1	2258915
chr1	2259018
chr1	2259520
chr1	2259523
chr1	2259752
chr1	2259772
chr1	2260475
chr1	2260559
chr1	2260568
chr1	2260649
chr1	2260656
chr1	2260657
chr1	2260736
chr1	2260759
chr1	2261412
chr1	2262175
chr1	2262234
chr1	2262784
chr1	2262799
chr1	2265479
chr1	2265545
chr1	2268278
chr1	2270390
chr1	2271214
chr1	2271215
chr1	2273040
chr1	2275231
chr1	2275245
chr1	2275453
chr1	2275462
chr1	2275528
chr1	2275719
chr1	2277013
chr1	2278388
chr1	2278961
chr1	2279907
chr1	2280131
chr1	2280909
chr1	2280971
chr1	2282416
chr1	2282444
chr1	2282540
chr1	2282541
chr1	2282543
chr1	2282811
chr1	2286741
chr1	2292979
chr1	2293120
chr1	2293351
chr1	2293362
chr1	2293552
chr1	2294962
chr1	2296548
chr1	2296922
chr1	2297180
chr1	2297403
chr1	2297593
chr1	2299311
chr1	2299314
chr1	2304116
chr1	2304752
chr1	2305002
chr1	2305290
chr1	2305887
chr1	2307040
chr1	2308200
chr1	2309388
chr1	2309606
chr1	2309702
chr1	2310102
chr1	2310510
chr1	2311222
chr1	2311440
chr1	2315260
chr1	2315331
chr1	2316051
chr1	2331932
chr1	2332126
chr1	2332677
chr1	2332794
chr1	2332900
chr1	2332975
chr1	2333243
chr1	2338678
chr1	2341974
chr1	2342270
chr1	2342575
chr1	2342607
chr1	2343081
chr1	2343791
chr1	2350304
chr1	2351318
chr1	2351353
chr1	2361489
chr1	2362738
chr1	2364103
chr1	2364115
chr1	2364367
chr1	2365570
chr1	2366268
chr1	2366432
chr1	2366440
chr1	2367345
chr1	2367600
chr1	2367720
chr1	2367757
chr1	2368311
chr1	2368368
chr1	2369110
chr1	2369113
chr1	2369427
chr1	2369647
chr1	2369653
chr1	2369721
chr1	2370183
chr1	2370337
chr1	2370373
chr1	2370458
chr1	2370470
chr1	2370482
chr1	2370698
chr1	2370933
chr1	2370938
chr1	2370954
chr1	2371323
chr1	2371332
chr1	2371379
chr1	2372052
chr1	2372344
chr1	2372370
chr1	2372378
chr1	2374103
chr1	2374104
chr1	2374119
chr1	2379863
chr1	2379897
chr1	2382453
chr1	2382501
chr1	2383538
chr1	2384590
chr1	2385347
chr1	2386464
chr1	2395683
chr1	2395708
chr1	2396115
chr1	2398034
chr1	2398127
chr1	2398428
chr1	2399462
chr1	2400334
chr1	2401676
chr1	2401711
chr1	2401827
chr1	2402490
chr1	2404671
chr1	2411079
chr1	2411504
chr1	2412105
chr1	2412424
chr1	2413101
chr1	2413119
chr1	2413515
chr1	2419176
chr1	2420053
chr1	2421334
chr1	2422372
chr1	2422414
chr1	2422428
chr1	2422563
chr1	2423348
chr1	2424240
chr1	2424320
chr1	2425013
chr1	2425372
chr1	2425531
chr1	2426644
chr1	2426658
chr1	2430022
chr1	2430111
chr1	2430984
chr1	2431743
chr1	2439590
chr1	2439629
chr1	2439630
chr1	2443845
chr1	2443874
chr1	2444327
chr1	2444611
chr1	2444673
chr1	2444681
chr1	2444702
chr1	2444755
chr1	2445103
chr1	2445123
chr1	2445149
chr1	2445407
chr1	2445610
chr1	2446166
chr1	2446964
chr1	2447231
chr1	2448503
chr1	2449139
chr1	2450267
chr1	2450801
chr1	2451872
chr1	2452020
chr1	2452037
chr1	2452890
chr1	2452973
chr1	2453778
chr1	2454345
chr1	2454505
chr1	2454518
chr1	2454880
chr1	2457247
chr1	2458858
chr1	2458872
chr1	2459361
chr1	2460416
chr1	2460624
chr1	2463099
chr1	2463185
chr1	2463280
chr1	2463306
chr1	2463316
chr1	2463389
chr1	2464821
chr1	2465219
chr1	2465479
chr1	2466962
chr1	2466965
chr1	2467817
chr1	2469038
chr1	2469201
chr1	2469295
chr1	2471112
chr1	2471479
chr1	2471506
chr1	2473267
chr1	2473284
chr1	2473409
chr1	2474127
chr1	2474288
chr1	2474625
chr1	2476091
chr1	2477306
chr1	2477704
chr1	2477774
chr1	2478638
chr1	2480439
chr1	2480741
chr1	2480846
chr1	2481500
chr1	2482377
chr1	2482473
chr1	2482592
chr1	2483328
chr1	2483481
chr1	2483539
chr1	2483710
chr1	2483934
chr1	2483979
chr1	2483982
chr1	2484041
chr1	2484596
chr1	2484783
chr1	2484987
chr1	2486025
chr1	2486457
chr1	2486710
chr1	2486724
chr1	2486731
chr1	2486946
chr1	2489590
chr1	2490497
chr1	2491739
chr1	2498392
chr1	2498410
chr1	2499074
chr1	2499142
chr1	2499211
chr1	2499313
chr1	2499364
chr1	2499442
chr1	2499463
chr1	2499532
chr1	2499577
chr1	2499848
chr1	2499940
chr1	2500129
chr1	2502279
chr1	2502501
chr1	2503546
chr1	2504104
chr1	2504573
chr1	2505068
chr1	2506863
chr1	2507106
chr1	2507529
chr1	2508872
chr1	2509048
chr1	2509257
chr1	2509353
chr1	2509853
chr1	2509854
chr1	2510522
chr1	2510595
chr1	2510730
chr1	2514204
chr1	2514211
chr1	2514251
chr1	2516077
chr1	2516326
chr1	2518184
chr1	2535690
chr1	2535714
chr1	2535715
chr1	2535744
chr1	2537629
chr1	2538179
chr1	2540106
chr1	2540726
chr1	2540828
chr1	2541749
chr1	2542768
chr1	2542885
chr1	2543121
chr1	2544912
chr1	2545033
chr1	2545140
chr1	2545188
chr1	2545728
chr1	2546439
chr1	2546892
chr1	2547384
chr1	2547485
chr1	2547487
chr1	2547518
chr1	2547555
chr1	2547594
chr1	2547645
chr1	2547688
chr1	2562784
chr1	2563172
chr1	2563240
chr1	2563458
chr1	2563473
chr1	2563515
chr1	2563544
chr1	2563569
chr1	2563606
chr1	2564671
chr1	2569574
chr1	2570619
chr1	2570954
chr1	2571139
chr1	2571222
chr1	2571577
chr1	2571742
chr1	2572153
chr1	2572186
chr1	2572587
chr1	2572692
chr1	2572881
chr1	2572905
chr1	2572956
chr1	2573028
chr1	2573244
chr1	2574078
chr1	2574185
chr1	2574401
chr1	2574408
chr1	2574426
chr1	2574443
chr1	2574975
chr1	2575106
chr1	2575163
chr1	2575964
chr1	2576361
chr1	2576630
chr1	2577330
chr1	2577460
chr1	2577673
chr1	2578534
chr1	2578535
chr1	2578653
chr1	2578802
chr1	2579385
chr1	2580602
chr1	2581094
chr1	2581102
chr1	2581155
chr1	2581699
chr1	2581777
chr1	2581838
chr1	2582456
chr1	2582551
chr1	2583838
chr1	2583853
chr1	2583856
chr1	2583877
chr1	2583988
chr1	2584057
chr1	2584326
chr1	2584616
chr1	2584662
chr1	2584663
chr1	2584702
chr1	2584705
chr1	2585702
chr1	2585806
chr1	2585891
chr1	2585892
chr1	2585893
chr1	2586289
chr1	2586413
chr1	2589672
chr1	2589840
chr1	2590276
chr1	2591036
chr1	2591744
chr1	2593291
chr1	2594340
chr1	2595453
chr1	2596347
chr1	2596777
chr1	2599582
chr1	2600326
chr1	2604257
chr1	2604521
chr1	2605078
chr1	2605447
chr1	2606695
chr1	2607078
chr1	2607167
chr1	2608193
chr1	2608329
chr1	2608443
chr1	2608534
chr1	2608542
chr1	2608584
chr1	2608899
chr1	2609067
chr1	2609130
chr1	2609265
chr1	2609290
chr1	2609346
chr1	2609367
chr1	2609427
chr1	2609454
chr1	2609540
chr1	2609562
chr1	2609637
chr1	2609690
chr1	2609755
chr1	2612922
chr1	2615541
chr1	2615681
chr1	2617188
chr1	2617340
chr1	2617535
chr1	2617758
chr1	2617873
chr1	2617914
chr1	2618297
chr1	2618766
chr1	2618998
chr1	2619464
chr1	2622488
chr1	2622835
chr1	2623402
chr1	2623417
chr1	2624195
chr1	2624197
chr1	2624585
chr1	2625158
chr1	2625492
chr1	2626103
chr1	2631084
chr1	2632613
chr1	2633534
chr1	2633936
chr1	2635425
chr1	2635515
chr1	2635630
chr1	2636136
chr1	2639191
chr1	2642583
chr1	2645213
chr1	2646513
chr1	2647801
chr1	2649155
chr1	2653933
chr1	2655953
chr1	2656827
chr1	2668086
chr1	2670152
chr1	2671066
chr1	2672729
chr1	2674392
chr1	2674640
chr1	2684864
chr1	2685703
chr1	2686021
chr1	2686371
chr1	2686467
chr1	2689107
chr1	2691274
chr1	2691893
chr1	2698932
chr1	2701308
chr1	2701778
chr1	2701944
chr1	2701963
chr1	2702224
chr1	2702300
chr1	2702524
chr1	2702546
chr1	2702697
chr1	2703013
chr1	2703139
chr1	2704081
chr1	2704201
chr1	2704225
chr1	2704539
chr1	2704560
chr1	2704659
chr1	2704725
chr1	2704832
chr1	2704989
chr1	2704998
chr1	2705031
chr1	2705058
chr1	2705076
chr1	2705311
chr1	2705710
chr1	2705884
chr1	2705944
chr1	2705953
chr1	2706147
chr1	2706180
chr1	2706213
chr1	2706216
chr1	2706225
chr1	2706279
chr1	2707166
chr1	2707640
chr1	2707773
chr1	2708055
chr1	2708250
chr1	2708274
chr1	2708465
chr1	2708669
chr1	2709007
chr1	2709467
chr1	2709500
chr1	2709811
chr1	2710258
chr1	2710285
chr1	2710300
chr1	2710324
chr1	2710479
chr1	2710499
chr1	2712756
chr1	2712999
chr1	2713106
chr1	2713758
chr1	2713765
chr1	2713835
chr1	2714084
chr1	2714117
chr1	2714126
chr1	2714232
chr1	2714319
chr1	2714384
chr1	2714507
chr1	2714583
chr1	2714622
chr1	2714689
chr1	2715096
chr1	2715101
chr1	2715127
chr1	2715185
chr1	2715194
chr1	2715250
chr1	2715285
chr1	2716226
chr1	2716331
chr1	2718872
chr1	2718942
chr1	2719495
chr1	2720109
chr1	2720702
chr1	2720898
chr1	2721420
chr1	2721582
chr1	2722039
chr1	2722046
chr1	2722381
chr1	2723887
chr1	2723922
chr1	2723948
chr1	2724577
chr1	2724849
chr1	2724850
chr1	2725145
chr1	2725426
chr1	2727505
chr1	2727579
chr1	2727702
chr1	2727936
chr1	2727937
chr1	2728402
chr1	2729101
chr1	2729665
chr1	2730008
chr1	2730202
chr1	2730600
chr1	2730979
chr1	2731159
chr1	2732917
chr1	2733007
chr1	2733146
chr1	2733155
chr1	2733567
chr1	2733721
chr1	2734339
chr1	2734978
chr1	2735252
chr1	2735357
chr1	2735468
chr1	2735506
chr1	2735515
chr1	2735557
chr1	2735558
chr1	2736964
chr1	2737231
chr1	2737267
chr1	2737568
chr1	2737707
chr1	2737975
chr1	2738287
chr1	2738632
chr1	2739242
chr1	2741691
chr1	2742370
chr1	2743549
chr1	2743935
chr1	2744307
chr1	2745383
chr1	2745521
chr1	2745572
chr1	2745578
chr1	2745635
chr1	2746048
chr1	2746376
chr1	2746647
chr1	2746694
chr1	2747190
chr1	2748494
chr1	2748640
chr1	2748899
chr1	2749025
chr1	2750384
chr1	2750880
chr1	2750997
chr1	2751023
chr1	2752244
chr1	2752349
chr1	2752425
chr1	2752548
chr1	2752562
chr1	2752721
chr1	2752925
chr1	2752953
chr1	2752961
chr1	2753138
chr1	2753165
chr1	2753363
chr1	2753410
chr1	2757900
chr1	2758057
chr1	2759038
chr1	2759133
chr1	2759388
chr1	2763394
chr1	2764653
chr1	2765849
chr1	2768033
chr1	2768474
chr1	2768479
chr1	2768542
chr1	2772434
chr1	2772738
chr1	2777308
chr1	2777572
chr1	2778963
chr1	2779074
chr1	2779101
chr1	2779108
chr1	2803306
chr1	2803817
chr1	2804461
chr1	2804497
chr1	2805345
chr1	2806718
chr1	2806763
chr1	2809650
chr1	2809880
chr1	2810315
chr1	2810560
chr1	2810596
chr1	2810597
chr1	2810711
chr1	2810821
chr1	2810902
chr1	2813050
chr1	2815002
chr1	2815021
chr1	2817007
chr1	2817736
chr1	2817741
chr1	2824492
chr1	2824494
chr1	2824714
chr1	2824769
chr1	2825071
chr1	2825828
chr1	2825832
chr1	2829156
chr1	2829247
chr1	2829253
chr1	2829508
chr1	2831840
chr1	2832055
chr1	2833549
chr1	2835441
chr1	2837010
chr1	2838055
chr1	2839641
chr1	2839777
chr1	2840296
chr1	2840359
chr1	2840959
chr1	2841021
chr1	2841032
chr1	2842263
chr1	2843443
chr1	2844995
chr1	2845659
chr1	2846929
chr1	2847506
chr1	2847692
chr1	2847751
chr1	2848616
chr1	2848732
chr1	2848739
chr1	2850521
chr1	2855545
chr1	2856579
chr1	2857187
chr1	2857276
chr1	2857313
chr1	2857320
chr1	2857631
chr1	2858187
chr1	2858952
chr1	2859056
chr1	2859477
chr1	2859838
chr1	2860402
chr1	2860641
chr1	2860667
chr1	2860794
chr1	2860927
chr1	2861116
chr1	2861121
chr1	2868728
chr1	2868758
chr1	2870288
chr1	2870295
chr1	2873567
chr1	2873708
chr1	2873801
chr1	2873804
chr1	2874393
chr1	2875099
chr1	2876465
chr1	2876504
chr1	2876505
chr1	2876534
chr1	2876609
chr1	2876647
chr1	2877067
chr1	2879977
chr1	2882860
chr1	2883882
chr1	2893457
chr1	2894348
chr1	2895235
chr1	2895530
chr1	2895656
chr1	2896688
chr1	2897373
chr1	2900333
chr1	2902890
chr1	2912901
chr1	2912940
chr1	2918806
chr1	2919759
chr1	2922208
chr1	2923584
chr1	2923589
chr1	2923591
chr1	2924416
chr1	2927679
chr1	2928356
chr1	2928452
chr1	2928578
chr1	2928916
chr1	2939787
chr1	2940779
chr1	2942575
chr1	2942630
chr1	2942666
chr1	2942907
chr1	2942954
chr1	2943123
chr1	2943815
chr1	2943907
chr1	2943908
chr1	2944187
chr1	2945204
chr1	2945219
chr1	2946257
chr1	2946357
chr1	2947964
chr1	2948668
chr1	2948808
chr1	2954064
chr1	2954889
chr1	2954892
chr1	2954912
chr1	2954943
chr1	2955573
chr1	2965505
chr1	2965758
chr1	2965785
chr1	2965792
chr1	2965975
chr1	2966118
chr1	2966152
chr1	2966196
chr1	2966227
chr1	2966229
chr1	2966261
chr1	2966314
chr1	2966316
chr1	2966434
chr1	2966563
chr1	2966654
chr1	2966663
chr1	2966761
chr1	2966791
chr1	2966799
chr1	2966989
chr1	2967032
chr1	2967055
chr1	2967070
chr1	2967331
chr1	2967336
chr1	2967427
chr1	2967446
chr1	2967634
chr1	2967643
chr1	2968063
chr1	2968079
chr1	2968085
chr1	2968095
chr1	2968132
chr1	2968295
chr1	2968450
chr1	2968485
chr1	2968507
chr1	2968601
chr1	2968603
chr1	2968696
chr1	2968738
chr1	2968841
chr1	2969125
chr1	2969284
chr1	2969310
chr1	2969352
chr1	2969450
chr1	2969542
chr1	2969561
chr1	2969787
chr1	2970078
chr1	2970099
chr1	2970412
chr1	2970447
chr1	2970462
chr1	2970543
chr1	2970553
chr1	2970669
chr1	2970682
chr1	2970684
chr1	2970735
chr1	2970948
chr1	2971049
chr1	2971062
chr1	2971095
chr1	2971151
chr1	2971161
chr1	2971245
chr1	2971359
chr1	2971400
chr1	2971634
chr1	2971658
chr1	2971682
chr1	2971947
chr1	2971977
chr1	2971995
chr1	2972040
chr1	2972058
chr1	2972067
chr1	2972088
chr1	2972091
chr1	2973181
chr1	2973366
chr1	2973962
chr1	2974226
chr1	2974852
chr1	2974864
chr1	2975308
chr1	2975310
chr1	2975401
chr1	2976605
chr1	2976822
chr1	2976824
chr1	2976827
chr1	2977893
chr1	2977917
chr1	2977919
chr1	2978040
chr1	2978188
chr1	2978310
chr1	2978357
chr1	2978377
chr1	2978456
chr1	2978501
chr1	2978576
chr1	2978642
chr1	2978651
chr1	2978705
chr1	2978767
chr1	2978768
chr1	2978870
chr1	2978909
chr1	2979132
chr1	2979155
chr1	2979284
chr1	2979326
chr1	2979340
chr1	2979419
chr1	2979598
chr1	2979615
chr1	2979663
chr1	2979694
chr1	2979808
chr1	2979843
chr1	2979849
chr1	2980056
chr1	2980120
chr1	2980232
chr1	2980659
chr1	2980753
chr1	2980766
chr1	2980794
chr1	2980881
chr1	2980932
chr1	2980966
chr1	2980967
chr1	2981310
chr1	2981319
chr1	2981810
chr1	2981912
chr1	2993388
chr1	2993502
chr1	2993748
chr1	2993820
chr1	2993887
chr1	2996112
chr1	2999962
chr1	2999970
chr1	3001880
chr1	3003657
chr1	3003934
chr1	3010373
chr1	3010813
chr1	3026189
chr1	3027590
chr1	3027776
chr1	3027910
chr1	3027913
chr1	3031708
chr1	3032303
chr1	3033676
chr1	3033971
chr1	3034103
chr1	3034793
chr1	3035638
chr1	3036140
chr1	3038098
chr1	3039818
chr1	3040298
chr1	3040483
chr1	3040641
chr1	3041006
chr1	3042336
chr1	3042649
chr1	3043883
chr1	3044048
chr1	3044443
chr1	3044444
chr1	3045547
chr1	3049404
chr1	3054364
chr1	3054519
chr1	3056269
chr1	3064252
chr1	3064450
chr1	3064566
chr1	3065073
chr1	3065923
chr1	3066840
chr1	3066904
chr1	3066995
chr1	3067966
chr1	3068121
chr1	3068205
chr1	3068364
chr1	3068379
chr1	3068386
chr1	3068501
chr1	3071608
chr1	3072809
chr1	3076653
chr1	3076657
chr1	3076699
chr1	3076737
chr1	3076750
chr1	3077507
chr1	3077678
chr1	3077681
chr1	3077684
chr1	3077696
chr1	3077729
chr1	3077777
chr1	3077834
chr1	3077862
chr1	3077876
chr1	3077933
chr1	3077965
chr1	3078012
chr1	3078140
chr1	3078149
chr1	3078351
chr1	3078373
chr1	3078396
chr1	3078523
chr1	3078524
chr1	3078636
chr1	3078643
chr1	3078682
chr1	3078812
chr1	3078905
chr1	3079011
chr1	3079064
chr1	3079195
chr1	3079229
chr1	3079253
chr1	3079304
chr1	3079418
chr1	3093805
chr1	3094014
chr1	3094147
chr1	3094528
chr1	3094534
chr1	3094592
chr1	3094594
chr1	3094837
chr1	3095323
chr1	3095480
chr1	3095585
chr1	3095609
chr1	3095657
chr1	3095699
chr1	3095834
chr1	3095973
chr1	3096062
chr1	3096223
chr1	3096229
chr1	3096781
chr1	3096916
chr1	3096925
chr1	3097330
chr1	3097363
chr1	3097672
chr1	3097690
chr1	3097696
chr1	3097804
chr1	3098242
chr1	3098509
chr1	3098803
chr1	3099028
chr1	3099247
chr1	3099250
chr1	3099406
chr1	3099442
chr1	3099538
chr1	3100217
chr1	3100234
chr1	3100510
chr1	3102202
chr1	3102262
chr1	3102596
chr1	3102735
chr1	3102791
chr1	3102872
chr1	3103156
chr1	3104682
chr1	3104701
chr1	3104710
chr1	3104746
chr1	3106002
chr1	3106014
chr1	3106099
chr1	3106204
chr1	3106596
chr1	3106888
chr1	3106921
chr1	3107641
chr1	3108710
chr1	3109106
chr1	3110640
chr1	3111385
chr1	3113182
chr1	3113777
chr1	3115031
chr1	3115282
chr1	3116038
chr1	3116459
chr1	3119101
chr1	3119929
chr1	3121467
chr1	3121697
chr1	3122531
chr1	3123136
chr1	3123176
chr1	3123540
chr1	3125177
chr1	3125344
chr1	3125662
chr1	3126626
chr1	3126936
chr1	3126941
chr1	3130864
chr1	3133663
chr1	3133693
chr1	3133702
chr1	3134105
chr1	3134139
chr1	3134204
chr1	3134210
chr1	3134220
chr1	3134251
chr1	3134284
chr1	3134425
chr1	3134485
chr1	3134488
chr1	3134502
chr1	3134562
chr1	3134689
chr1	3134758
chr1	3134919
chr1	3135031
chr1	3135043
chr1	3135067
chr1	3135126
chr1	3135279
chr1	3135379
chr1	3135437
chr1	3135561
chr1	3135636
chr1	3135637
chr1	3135726
chr1	3135828
chr1	3135836
chr1	3136256
chr1	3136690
chr1	3136694
chr1	3136765
chr1	3136820
chr1	3136823
chr1	3138626
chr1	3139578
chr1	3139660
chr1	3140151
chr1	3140163
chr1	3140951
chr1	3141087
chr1	3141127
chr1	3141355
chr1	3141783
chr1	3142107
chr1	3142130
chr1	3142136
chr1	3142395
chr1	3142406
chr1	3142868
chr1	3143011
chr1	3148263
chr1	3148670
chr1	3149707
chr1	3149881
chr1	3150096
chr1	3152014
chr1	3153503
chr1	3154266
chr1	3154325
chr1	3155192
chr1	3156184
chr1	3157352
chr1	3158714
chr1	3158792
chr1	3159183
chr1	3159199
chr1	3159224
chr1	3159234
chr1	3159255
chr1	3159257
chr1	3159296
chr1	3159433
chr1	3159764
chr1	3160247
chr1	3160464
chr1	3160599
chr1	3160656
chr1	3160713
chr1	3161012
chr1	3161161
chr1	3161238
chr1	3161914
chr1	3161929
chr1	3161934
chr1	3161976
chr1	3162181
chr1	3162506
chr1	3162563
chr1	3162749
chr1	3162929
chr1	3162947
chr1	3163211
chr1	3163337
chr1	3163388
chr1	3163475
chr1	3163500
chr1	3163691
chr1	3163763
chr1	3163832
chr1	3163841
chr1	3163898
chr1	3163922
chr1	3164295
chr1	3165093
chr1	3165214
chr1	3165226
chr1	3165534
chr1	3166371
chr1	3166648
chr1	3167369
chr1	3167534
chr1	3167714
chr1	3170066
chr1	3170101
chr1	3170102
chr1	3172328
chr1	3172329
chr1	3173153
chr1	3173419
chr1	3173808
chr1	3173809
chr1	3174213
chr1	3174283
chr1	3174752
chr1	3174774
chr1	3176640
chr1	3176929
chr1	3177931
chr1	3178150
chr1	3179176
chr1	3179530
chr1	3180305
chr1	3180526
chr1	3180948
chr1	3181127
chr1	3182508
chr1	3182548
chr1	3184134
chr1	3189390
chr1	3189975
chr1	3190117
chr1	3190506
chr1	3190615
chr1	3190650
chr1	3191125
chr1	3191160
chr1	3191341
chr1	3191387
chr1	3191620
chr1	3191662
chr1	3191938
chr1	3191952
chr1	3191975
chr1	3191983
chr1	3192028
chr1	3192055
chr1	3192058
chr1	3192061
chr1	3192112
chr1	3192150
chr1	3192197
chr1	3192205
chr1	3192327
chr1	3192380
chr1	3192758
chr1	3192768
chr1	3192801
chr1	3192838
chr1	3192846
chr1	3192873
chr1	3192918
chr1	3192987
chr1	3192990
chr1	3193064
chr1	3193130
chr1	3193131
chr1	3193134
chr1	3193155
chr1	3193429
chr1	3193452
chr1	3193474
chr1	3193795
chr1	3194098
chr1	3194578
chr1	3194784
chr1	3194869
chr1	3195877
chr1	3195972
chr1	3196851
chr1	3197029
chr1	3197375
chr1	3197791
chr1	3197848
chr1	3198491
chr1	3198695
chr1	3198701
chr1	3199215
chr1	3199288
chr1	3199402
chr1	3199536
chr1	3207023
chr1	3207308
chr1	3207966
chr1	3208203
chr1	3208221
chr1	3208312
chr1	3208369
chr1	3208433
chr1	3208551
chr1	3218128
chr1	3218366
chr1	3218367
chr1	3218369
chr1	3218466
chr1	3218480
chr1	3218660
chr1	3218705
chr1	3218717
chr1	3218747
chr1	3218777
chr1	3219098
chr1	3219113
chr1	3219221
chr1	3219269
chr1	3219275
chr1	3219485
chr1	3219527
chr1	3219545
chr1	3219551
chr1	3219563
chr1	3219594
chr1	3219614
chr1	3219675
chr1	3219731
chr1	3220035
chr1	3220107
chr1	3220265
chr1	3220278
chr1	3220416
chr1	3220475
chr1	3220527
chr1	3220548
chr1	3220680
chr1	3221028
chr1	3221034
chr1	3221045
chr1	3221065
chr1	3221104
chr1	3221141
chr1	3221499
chr1	3223394
chr1	3223583
chr1	3223844
chr1	3224044
chr1	3224266
chr1	3224577
chr1	3224615
chr1	3224631
chr1	3225130
chr1	3225210
chr1	3225296
chr1	3225297
chr1	3225467
chr1	3226075
chr1	3226177
chr1	3226234
chr1	3226353
chr1	3226982
chr1	3237066
chr1	3237150
chr1	3237171
chr1	3237204
chr1	3237308
chr1	3237339
chr1	3237414
chr1	3237452
chr1	3237532
chr1	3237587
chr1	3237866
chr1	3237889
chr1	3237983
chr1	3237992
chr1	3238028
chr1	3238064
chr1	3238067
chr1	3238094
chr1	3238121
chr1	3238154
chr1	3238163
chr1	3238271
chr1	3238277
chr1	3238520
chr1	3238644
chr1	3238730
chr1	3239010
chr1	3239081
chr1	3239152
chr1	3239183
chr1	3239211
chr1	3239217
chr1	3239224
chr1	3239498
chr1	3240729
chr1	3240991
chr1	3240993
chr1	3241017
chr1	3241192
chr1	3241239
chr1	3241242
chr1	3241329
chr1	3241398
chr1	3241428
chr1	3241602
chr1	3242489
chr1	3244470
chr1	3244572
chr1	3245607
chr1	3245682
chr1	3245775
chr1	3245838
chr1	3246009
chr1	3246077
chr1	3246667
chr1	3246682
chr1	3246691
chr1	3246719
chr1	3246814
chr1	3247076
chr1	3247098
chr1	3247147
chr1	3247156
chr1	3247803
chr1	3247810
chr1	3252729
chr1	3252806
chr1	3255494
chr1	3260945
chr1	3261473
chr1	3262365
chr1	3262691
chr1	3263037
chr1	3269670
chr1	3270542
chr1	3270827
chr1	3270896
chr1	3271448
chr1	3271457
chr1	3275204
chr1	3275661
chr1	3276025
chr1	3277816
chr1	3279034
chr1	3282515
chr1	3282571
chr1	3282856
chr1	3283264
chr1	3283372
chr1	3283373
chr1	3283479
chr1	3288616
chr1	3288622
chr1	3288665
chr1	3288689
chr1	3289005
chr1	3289031
chr1	3289065
chr1	3289182
chr1	3289379
chr1	3289506
chr1	3289845
chr1	3289915
chr1	3289951
chr1	3289963
chr1	3290101
chr1	3290107
chr1	3290296
chr1	3290354
chr1	3290545
chr1	3290620
chr1	3290663
chr1	3290779
chr1	3290785
chr1	3291048
chr1	3291093
chr1	3291116
chr1	3291144
chr1	3291808
chr1	3291862
chr1	3292135
chr1	3292198
chr1	3292205
chr1	3292255
chr1	3292263
chr1	3292297
chr1	3292672
chr1	3292799
chr1	3293308
chr1	3293338
chr1	3293374
chr1	3293376
chr1	3293384
chr1	3293419
chr1	3294804
chr1	3295050
chr1	3295086
chr1	3295206
chr1	3295226
chr1	3296028
chr1	3297772
chr1	3297843
chr1	3297846
chr1	3298627
chr1	3298649
chr1	3298887
chr1	3299099
chr1	3299213
chr1	3299244
chr1	3299408
chr1	3299409
chr1	3299420
chr1	3299426
chr1	3299612
chr1	3299903
chr1	3299956
chr1	3299993
chr1	3300018
chr1	3300130
chr1	3300362
chr1	3300766
chr1	3302610
chr1	3302661
chr1	3302777
chr1	3302813
chr1	3303166
chr1	3303190
chr1	3303266
chr1	3303274
chr1	3303389
chr1	3303551
chr1	3303622
chr1	3303667
chr1	3303768
chr1	3304073
chr1	3304127
chr1	3304284
chr1	3304304
chr1	3304384
chr1	3304757
chr1	3305320
chr1	3305345
chr1	3305719
chr1	3305811
chr1	3305937
chr1	3305949
chr1	3305979
chr1	3306007
chr1	3306017
chr1	3306387
chr1	3312430
chr1	3312965
chr1	3313105
chr1	3313186
chr1	3313411
chr1	3313415
chr1	3313889
chr1	3314224
chr1	3314373
chr1	3315016
chr1	3315068
chr1	3315253
chr1	3315312
chr1	3315320
chr1	3315505
chr1	3315513
chr1	3315699
chr1	3315952
chr1	3316059
chr1	3316550
chr1	3316610
chr1	3317914
chr1	3318577
chr1	3318891
chr1	3319068
chr1	3319212
chr1	3319589
chr1	3319633
chr1	3320238
chr1	3320311
chr1	3320363
chr1	3320497
chr1	3320652
chr1	3320653
chr1	3320999
chr1	3321503
chr1	3321543
chr1	3321592
chr1	3321600
chr1	3321902
chr1	3321979
chr1	3323366
chr1	3326046
chr1	3326190
chr1	3326192
chr1	3326398
chr1	3326491
chr1	3326528
chr1	3328946
chr1	3329225
chr1	3329641
chr1	3329991
chr1	3330018
chr1	3330173
chr1	3330194
chr1	3330654
chr1	3330794
chr1	3330879
chr1	3330945
chr1	3331043
chr1	3331403
chr1	3331621
chr1	3333623
chr1	3334104
chr1	3334133
chr1	3334584
chr1	3335089
chr1	3335236
chr1	3335544
chr1	3335559
chr1	3336403
chr1	3336472
chr1	3336700
chr1	3336796
chr1	3336798
chr1	3336844
chr1	3336913
chr1	3336973
chr1	3337024
chr1	3337083
chr1	3337136
chr1	3337250
chr1	3337275
chr1	3337297
chr1	3337318
chr1	3338335
chr1	3338465
chr1	3338493
chr1	3338615
chr1	3338621
chr1	3339016
chr1	3339382
chr1	3339508
chr1	3340319
chr1	3340329
chr1	3340739
chr1	3340743
chr1	3341410
chr1	3346493
chr1	3346583
chr1	3346610
chr1	3346684
chr1	3346809
chr1	3347014
chr1	3347225
chr1	3347683
chr1	3349293
chr1	3349617
chr1	3349851
chr1	3350158
chr1	3350512
chr1	3352378
chr1	3352575
chr1	3352946
chr1	3355642
chr1	3356542
chr1	3358690
chr1	3359097
chr1	3359273
chr1	3359559
chr1	3359663
chr1	3363878
chr1	3364972
chr1	3365395
chr1	3366074
chr1	3366078
chr1	3366220
chr1	3366222
chr1	3370498
chr1	3370639
chr1	3370649
chr1	3371614
chr1	3371851
chr1	3371892
chr1	3372670
chr1	3373224
chr1	3373279
chr1	3373528
chr1	3373759
chr1	3374264
chr1	3375565
chr1	3375949
chr1	3376685
chr1	3376893
chr1	3377066
chr1	3377111
chr1	3377136
chr1	3377172
chr1	3377324
chr1	3378270
chr1	3378277
chr1	3378531
chr1	3378705
chr1	3378809
chr1	3379024
chr1	3379207
chr1	3379849
chr1	3381562
chr1	3381976
chr1	3382007
chr1	3382281
chr1	3382642
chr1	3382869
chr1	3382966
chr1	3382988
chr1	3383125
chr1	3383248
chr1	3383685
chr1	3383895
chr1	3383899
chr1	3384084
chr1	3384096
chr1	3384175
chr1	3384219
chr1	3384257
chr1	3384309
chr1	3384349
chr1	3384655
chr1	3384896
chr1	3385610
chr1	3385658
chr1	3386200
chr1	3386548
chr1	3387729
chr1	3389611
chr1	3392110
chr1	3392288
chr1	3393285
chr1	3394986
chr1	3394988
chr1	3407082
chr1	3407790
chr1	3408224
chr1	3408310
chr1	3408792
chr1	3409078
chr1	3409217
chr1	3410255
chr1	3411252
chr1	3412697
chr1	3418702
chr1	3424908
chr1	3425106
chr1	3428873
chr1	3428947
chr1	3429549
chr1	3429827
chr1	3433361
chr1	3437225
chr1	3437336
chr1	3440080
chr1	3442339
chr1	3443042
chr1	3443793
chr1	3443802
chr1	3454272
chr1	3458055
chr1	3459781
chr1	3459900
chr1	3460058
chr1	3460271
chr1	3460366
chr1	3460383
chr1	3460703
chr1	3460930
chr1	3463227
chr1	3463230
chr1	3464131
chr1	3464202
chr1	3464235
chr1	3465262
chr1	3465345
chr1	3466173
chr1	3466830
chr1	3470141
chr1	3470740
chr1	3471105
chr1	3471156
chr1	3471162
chr1	3471189
chr1	3471222
chr1	3471298
chr1	3471359
chr1	3471584
chr1	3471878
chr1	3472100
chr1	3472568
chr1	3475067
chr1	3487816
chr1	3488796
chr1	3489701
chr1	3491149
chr1	3491879
chr1	3493528
chr1	3502276
chr1	3502277
chr1	3502357
chr1	3502384
chr1	3502581
chr1	3502724
chr1	3502779
chr1	3502815
chr1	3502917
chr1	3502929
chr1	3503145
chr1	3503187
chr1	3503896
chr1	3504123
chr1	3504163
chr1	3504258
chr1	3504325
chr1	3504525
chr1	3504562
chr1	3504650
chr1	3504706
chr1	3504877
chr1	3504883
chr1	3505094
chr1	3505230
chr1	3505320
chr1	3505344
chr1	3505365
chr1	3505528
chr1	3507083
chr1	3507086
chr1	3507104
chr1	3507135
chr1	3507337
chr1	3507916
chr1	3508518
chr1	3508829
chr1	3513160
chr1	3513470
chr1	3513817
chr1	3524396
chr1	3524479
chr1	3524857
chr1	3524875
chr1	3524879
chr1	3524905
chr1	3525306
chr1	3525384
chr1	3525933
chr1	3526123
chr1	3535630
chr1	3550251
chr1	3550407
chr1	3554222
chr1	3554240
chr1	3554258
chr1	3554298
chr1	3554424
chr1	3554508
chr1	3556047
chr1	3563972
chr1	3564034
chr1	3564166
chr1	3565345
chr1	3567532
chr1	3568398
chr1	3569206
chr1	3569606
chr1	3575052
chr1	3575288
chr1	3576454
chr1	3577545
chr1	3593773
chr1	3593849
chr1	3600937
chr1	3601390
chr1	3603239
chr1	3603444
chr1	3605625
chr1	3609538
chr1	3614650
chr1	3615525
chr1	3615526
chr1	3615550
chr1	3617802
chr1	3629727
chr1	3632581
chr1	3634809
chr1	3635030
chr1	3635177
chr1	3635808
chr1	3643766
chr1	3649261
chr1	3658126
chr1	3658202
chr1	3663052
chr1	3665426
chr1	3665767
chr1	3665963
chr1	3674900
chr1	3677300
chr1	3677520
chr1	3677889
chr1	3678383
chr1	3682404
chr1	3687831
chr1	3688016
chr1	3688532
chr1	3689074
chr1	3702611
chr1	3706519
chr1	3708592
chr1	3715895
chr1	3717273
chr1	3719706
chr1	3729188
chr1	3729192
chr1	3729399
chr1	3729743
chr1	3729815
chr1	3729828
chr1	3729985
chr1	3741062
chr1	3741064
chr1	3741903
chr1	3742348
chr1	3742661
chr1	3744308
chr1	3744563
chr1	3745047
chr1	3745379
chr1	3745409
chr1	3745417
chr1	3745484
chr1	3745737
chr1	3745772
chr1	3745833
chr1	3745853
chr1	3746119
chr1	3746203
chr1	3746982
chr1	3747038
chr1	3754018
chr1	3754973
chr1	3755426
chr1	3755599
chr1	3767632
chr1	3767634
chr1	3767754
chr1	3767841
chr1	3768031
chr1	3768205
chr1	3768214
chr1	3777808
chr1	3777913
chr1	3778144
chr1	3778623
chr1	3778811
chr1	3778815
chr1	3778874
chr1	3778875
chr1	3778997
chr1	3779036
chr1	3779309
chr1	3779327
chr1	3779713
chr1	3779935
chr1	3780228
chr1	3780260
chr1	3780330
chr1	3780341
chr1	3780343
chr1	3786736
chr1	3787623
chr1	3788162
chr1	3788771
chr1	3789220
chr1	3789386
chr1	3789397
chr1	3789495
chr1	3790103
chr1	3796188
chr1	3800859
chr1	3801169
chr1	3801193
chr1	3801527
chr1	3801582
chr1	3801662
chr1	3802252
chr1	3802717
chr1	3807240
chr1	3807493
chr1	3807546
chr1	3807682
chr1	3807733
chr1	3807788
chr1	3807798
chr1	3807807
chr1	3808079
chr1	3808111
chr1	3808125
chr1	3808181
chr1	3808279
chr1	3808364
chr1	3808391
chr1	3808410
chr1	3808434
chr1	3808491
chr1	3808657
chr1	3808681
chr1	3811798
chr1	3811833
chr1	3822260
chr1	3822324
chr1	3822600
chr1	3827963
chr1	3828098
chr1	3828117
chr1	3828201
chr1	3828225
chr1	3828753
chr1	3828872
chr1	3828999
chr1	3829000
chr1	3829097
chr1	3829114
chr1	3829434
chr1	3829580
chr1	3829671
chr1	3829677
chr1	3833858
chr1	3834971
chr1	3837261
chr1	3837262
chr1	3837854
chr1	3837971
chr1	3839791
chr1	3842536
chr1	3844293
chr1	3844791
chr1	3846273
chr1	3847403
chr1	3848300
chr1	3849979
chr1	3850417
chr1	3862562
chr1	3862735
chr1	3863829
chr1	3864123
chr1	3864141
chr1	3865545
chr1	3865721
chr1	3873494
chr1	3873696
chr1	3874486
chr1	3874488
chr1	3874595
chr1	3874738
chr1	3875269
chr1	3875306
chr1	3875328
chr1	3875374
chr1	3875668
chr1	3875895
chr1	3876094
chr1	3895250
chr1	3895332
chr1	3895418
chr1	3895466
chr1	3895535
chr1	3895561
chr1	3896065
chr1	3896102
chr1	3896125
chr1	3896294
chr1	3896497
chr1	3896599
chr1	3896770
chr1	3896858
chr1	3899308
chr1	3912923
chr1	3913021
chr1	3913088
chr1	3913134
chr1	3913135
chr1	3916113
chr1	3916947
chr1	3916976
chr1	3917007
chr1	3917244
chr1	3920870
chr1	3921016
chr1	3921416
chr1	3921527
chr1	3921714
chr1	3921859
chr1	3921904
chr1	3922743
chr1	3923755
chr1	3924451
chr1	3928298
chr1	3928334
chr1	3928363
chr1	3928390
chr1	3928392
chr1	3928497
chr1	3929019
chr1	3929277
chr1	3929355
chr1	3929364
chr1	3929588
chr1	3929635
chr1	3929711
chr1	3929757
chr1	3929782
chr1	3929835
chr1	3929894
chr1	3929960
chr1	3930434
chr1	3930491
chr1	3930494
chr1	3930515
chr1	3930939
chr1	3931207
chr1	3931246
chr1	3931276
chr1	3931282
chr1	3931363
chr1	3938966
chr1	3946061
chr1	3946079
chr1	3948787
chr1	3950380
chr1	3950421
chr1	3950600
chr1	3951099
chr1	3953853
chr1	3954711
chr1	3954792
chr1	3956472
chr1	3967694
chr1	3969359
chr1	3969383
chr1	3969772
chr1	3971150
chr1	3972222
chr1	3977771
chr1	3980548
chr1	3991505
chr1	3991580
chr1	3995370
chr1	3995623
chr1	3995651
chr1	3996661
chr1	3996784
chr1	3996895
chr1	3997059
chr1	3997228
chr1	3997408
chr1	3997434
chr1	3997503
chr1	3997535
chr1	3997596
chr1	3997605
chr1	3997690
chr1	3997721
chr1	3997840
chr1	4001408
chr1	4001410
chr1	4001906
chr1	4002250
chr1	4002573
chr1	4002777
chr1	4002864
chr1	4002963
chr1	4003020
chr1	4003257
chr1	4003299
chr1	4003315
chr1	4003353
chr1	4003365
chr1	4003372
chr1	4003376
chr1	4003873
chr1	4003945
chr1	4004032
chr1	4004173
chr1	4004434
chr1	4004486
chr1	4004705
chr1	4004817
chr1	4005449
chr1	4005497
chr1	4005679
chr1	4005763
chr1	4005840
chr1	4006019
chr1	4006118
chr1	4006219
chr1	4006239
chr1	4006304
chr1	4006319
chr1	4006433
chr1	4006451
chr1	4006487
chr1	4006508
chr1	4006549
chr1	4007338
chr1	4007729
chr1	4007945
chr1	4007987
chr1	4008208
chr1	4008331
chr1	4008760
chr1	4008786
chr1	4008794
chr1	4008811
chr1	4009184
chr1	4009205
chr1	4009281
chr1	4009369
chr1	4009837
chr1	4009847
chr1	4009872
chr1	4010067
chr1	4011003
chr1	4013069
chr1	4013591
chr1	4014099
chr1	4014435
chr1	4014472
chr1	4014944
chr1	4015264
chr1	4016534
chr1	4018283
chr1	4018503
chr1	4020827
chr1	4029763
chr1	4030377
chr1	4030482
chr1	4034601
chr1	4036434
chr1	4040087
chr1	4040135
chr1	4040150
chr1	4040591
chr1	4040592
chr1	4041654
chr1	4042507
chr1	4042712
chr1	4043146
chr1	4043393
chr1	4043412
chr1	4043459
chr1	4043559
chr1	4043582
chr1	4050517
chr1	4050659
chr1	4050668
chr1	4050812
chr1	4050851
chr1	4050867
chr1	4051299
chr1	4051352
chr1	4051398
chr1	4051561
chr1	4052092
chr1	4052634
chr1	4052742
chr1	4052949
chr1	4053232
chr1	4053253
chr1	4053662
chr1	4053665
chr1	4058268
chr1	4058278
chr1	4062573
chr1	4062673
chr1	4062844
chr1	4064793
chr1	4064800
chr1	4064813
chr1	4064824
chr1	4065249
chr1	4065846
chr1	4070738
chr1	4070795
chr1	4074834
chr1	4076792
chr1	4076903
chr1	4076905
chr1	4077785
chr1	4090578
chr1	4090614
chr1	4105858
chr1	4106763
chr1	4106840
chr1	4107815
chr1	4108291
chr1	4108627
chr1	4109069
chr1	4115628
chr1	4117316
chr1	4118745
chr1	4119028
chr1	4119653
chr1	4119698
chr1	4119877
chr1	4120080
chr1	4120269
chr1	4120317
chr1	4120483
chr1	4120496
chr1	4120526
chr1	4120533
chr1	4120652
chr1	4120724
chr1	4120730
chr1	4120745
chr1	4120748
chr1	4120809
chr1	4120829
chr1	4120846
chr1	4120852
chr1	4120891
chr1	4122374
chr1	4122925
chr1	4123107
chr1	4123458
chr1	4123863
chr1	4126166
chr1	4126208
chr1	4126271
chr1	4126364
chr1	4126370
chr1	4126418
chr1	4126528
chr1	4126541
chr1	4126547
chr1	4126553
chr1	4126565
chr1	4126762
chr1	4126910
chr1	4127343
chr1	4127665
chr1	4127724
chr1	4127764
chr1	4127793
chr1	4128051
chr1	4128159
chr1	4138117
chr1	4139802
chr1	4141439
chr1	4141624
chr1	4141631
chr1	4142018
chr1	4142167
chr1	4142244
chr1	4142478
chr1	4142574
chr1	4142768
chr1	4143029
chr1	4143035
chr1	4143783
chr1	4143799
chr1	4144972
chr1	4145168
chr1	4145269
chr1	4145615
chr1	4146373
chr1	4147735
chr1	4147798
chr1	4149942
chr1	4159345
chr1	4159387
chr1	4160401
chr1	4161223
chr1	4172733
chr1	4175358
chr1	4175374
chr1	4175515
chr1	4175763
chr1	4175820
chr1	4177053
chr1	4177391
chr1	4177422
chr1	4177496
chr1	4178603
chr1	4179456
chr1	4179729
chr1	4180118
chr1	4180547
chr1	4180667
chr1	4181096
chr1	4181763
chr1	4182085
chr1	4182288
chr1	4182442
chr1	4182453
chr1	4183274
chr1	4183410
chr1	4183689
chr1	4184238
chr1	4184284
chr1	4184472
chr1	4184994
chr1	4185460
chr1	4187986
chr1	4194991
chr1	4196267
chr1	4198605
chr1	4199596
chr1	4199877
chr1	4200426
chr1	4200779
chr1	4201106
chr1	4201961
chr1	4202765
chr1	4205756
chr1	4206064
chr1	4206526
chr1	4206831
chr1	4206846
chr1	4207216
chr1	4207463
chr1	4207654
chr1	4207839
chr1	4208006
chr1	4208014
chr1	4208027
chr1	4208165
chr1	4208180
chr1	4208183
chr1	4208216
chr1	4208227
chr1	4208246
chr1	4208627
chr1	4208654
chr1	4208687
chr1	4208721
chr1	4208725
chr1	4208738
chr1	4212503
chr1	4220322
chr1	4220323
chr1	4222346
chr1	4222429
chr1	4222441
chr1	4222492
chr1	4222534
chr1	4222546
chr1	4222776
chr1	4223146
chr1	4223184
chr1	4223450
chr1	4224361
chr1	4224864
chr1	4224945
chr1	4225109
chr1	4225118
chr1	4225123
chr1	4225207
chr1	4227785
chr1	4233888
chr1	4233999
chr1	4234765
chr1	4235391
chr1	4235774
chr1	4237677
chr1	4237986
chr1	4241688
chr1	4241693
chr1	4241701
chr1	4241740
chr1	4241794
chr1	4241799
chr1	4242035
chr1	4242050
chr1	4242053
chr1	4242344
chr1	4248319
chr1	4249323
chr1	4249346
chr1	4252415
chr1	4252494
chr1	4252499
chr1	4255575
chr1	4256461
chr1	4257827
chr1	4267130
chr1	4267467
chr1	4268316
chr1	4268356
chr1	4269058
chr1	4270435
chr1	4274673
chr1	4275390
chr1	4283271
chr1	4285765
chr1	4287491
chr1	4288014
chr1	4288731
chr1	4288845
chr1	4290313
chr1	4295320
chr1	4296538
chr1	4297008
chr1	4303667
chr1	4303700
chr1	4303848
chr1	4304021
chr1	4304547
chr1	4304568
chr1	4304580
chr1	4304631
chr1	4304652
chr1	4304664
chr1	4304697
chr1	4304741
chr1	4304756
chr1	4304882
chr1	4305062
chr1	4305511
chr1	4305523
chr1	4305552
chr1	4306000
chr1	4306215
chr1	4306384
chr1	4306520
chr1	4306902
chr1	4306923
chr1	4307088
chr1	4307092
chr1	4307309
chr1	4307314
chr1	4307554
chr1	4307622
chr1	4307683
chr1	4307882
chr1	4320041
chr1	4320106
chr1	4320145
chr1	4321308
chr1	4322135
chr1	4322825
chr1	4322842
chr1	4322857
chr1	4323686
chr1	4326805
chr1	4326819
chr1	4327137
chr1	4327974
chr1	4333781
chr1	4334710
chr1	4334787
chr1	4335502
chr1	4336251
chr1	4345177
chr1	4345231
chr1	4345238
chr1	4345302
chr1	4345350
chr1	4345391
chr1	4345406
chr1	4345543
chr1	4345545
chr1	4345619
chr1	4345845
chr1	4345943
chr1	4345962
chr1	4346020
chr1	4346045
chr1	4346511
chr1	4346604
chr1	4347254
chr1	4347256
chr1	4347260
chr1	4347326
chr1	4347518
chr1	4348251
chr1	4348611
chr1	4348799
chr1	4348863
chr1	4348916
chr1	4348952
chr1	4349066
chr1	4349094
chr1	4349232
chr1	4349288
chr1	4349314
chr1	4349937
chr1	4349985
chr1	4350521
chr1	4350819
chr1	4351479
chr1	4352836
chr1	4352978
chr1	4355175
chr1	4358138
chr1	4358141
chr1	4358174
chr1	4361693
chr1	4362032
chr1	4362229
chr1	4363036
chr1	4363395
chr1	4363730
chr1	4363944
chr1	4364273
chr1	4364651
chr1	4364655
chr1	4367571
chr1	4367572
chr1	4368049
chr1	4368321
chr1	4368497
chr1	4368783
chr1	4374375
chr1	4374800
chr1	4375743
chr1	4375771
chr1	4376261
chr1	4376474
chr1	4376578
chr1	4377961
chr1	4378068
chr1	4378217
chr1	4378347
chr1	4379761
chr1	4379920
chr1	4379974
chr1	4380061
chr1	4380070
chr1	4380654
chr1	4384583
chr1	4384805
chr1	4384916
chr1	4385261
chr1	4385291
chr1	4385408
chr1	4385561
chr1	4385798
chr1	4385807
chr1	4386057
chr1	4386141
chr1	4386159
chr1	4386277
chr1	4386295
chr1	4390433
chr1	4393636
chr1	4400326
chr1	4400664
chr1	4416443
chr1	4423828
chr1	4424238
chr1	4425118
chr1	4425122
chr1	4425251
chr1	4425449
chr1	4425542
chr1	4433808
chr1	4435760
chr1	4436181
chr1	4438547
chr1	4440774
chr1	4444102
chr1	4444145
chr1	4446139
chr1	4446954
chr1	4447314
chr1	4447321
chr1	4448426
chr1	4449079
chr1	4449155
chr1	4451021
chr1	4451164
chr1	4452315
chr1	4453648
chr1	4454094
chr1	4454382
chr1	4460820
chr1	4462192
chr1	4462807
chr1	4469268
chr1	4470639
chr1	4471029
chr1	4472330
chr1	4472357
chr1	4473140
chr1	4478282
chr1	4478705
chr1	4479201
chr1	4480299
chr1	4481291
chr1	4481703
chr1	4484864
chr1	4485003
chr1	4485735
chr1	4486309
chr1	4487001
chr1	4487980
chr1	4490566
chr1	4491475
chr1	4496160
chr1	4499139
chr1	4500439
chr1	4500747
chr1	4502781
chr1	4509522
chr1	4509677
chr1	4509690
chr1	4509732
chr1	4509804
chr1	4511176
chr1	4511951
chr1	4512135
chr1	4512439
chr1	4512907
chr1	4513209
chr1	4513224
chr1	4513231
chr1	4513342
chr1	4513389
chr1	4517387
chr1	4517451
chr1	4517452
chr1	4517880
chr1	4518168
chr1	4518395
chr1	4519432
chr1	4519876
chr1	4525663
chr1	4525841
chr1	4528948
chr1	4545098
chr1	4545675
chr1	4545972
chr1	4546483
chr1	4546611
chr1	4546899
chr1	4547020
chr1	4547023
chr1	4547035
chr1	4547202
chr1	4547596
chr1	4547711
chr1	4547842
chr1	4547846
chr1	4548123
chr1	4548213
chr1	4548273
chr1	4548315
chr1	4548363
chr1	4548417
chr1	4548447
chr1	4548462
chr1	4548562
chr1	4548670
chr1	4565577
chr1	4569317
chr1	4569804
chr1	4573542
chr1	4576568
chr1	4576907
chr1	4577192
chr1	4577991
chr1	4582179
chr1	4582213
chr1	4582780
chr1	4582847
chr1	4583350
chr1	4583426
chr1	4583752
chr1	4585372
chr1	4585848
chr1	4585890
chr1	4586303
chr1	4586321
chr1	4592616
chr1	4592639
chr1	4592883
chr1	4593343
chr1	4593480
chr1	4593632
chr1	4593646
chr1	4593997
chr1	4594030
chr1	4594294
chr1	4601453
chr1	4601507
chr1	4601563
chr1	4601741
chr1	4601762
chr1	4601786
chr1	4601874
chr1	4601930
chr1	4601931
chr1	4602267
chr1	4602271
chr1	4602320
chr1	4602331
chr1	4602396
chr1	4602496
chr1	4602575
chr1	4602610
chr1	4602611
chr1	4602688
chr1	4602752
chr1	4602850
chr1	4602884
chr1	4602908
chr1	4603103
chr1	4603129
chr1	4603169
chr1	4603200
chr1	4603224
chr1	4603257
chr1	4603263
chr1	4603267
chr1	4603405
chr1	4603411
chr1	4608231
chr1	4608839
chr1	4609176
chr1	4609242
chr1	4609508
chr1	4609574
chr1	4609931
chr1	4610498
chr1	4610584
chr1	4612819
chr1	4612846
chr1	4612868
chr1	4612879
chr1	4613079
chr1	4613090
chr1	4613239
chr1	4613241
chr1	4613980
chr1	4613992
chr1	4614025
chr1	4614089
chr1	4614111
chr1	4614254
chr1	4614483
chr1	4614588
chr1	4614702
chr1	4614864
chr1	4614867
chr1	4614876
chr1	4616054
chr1	4616055
chr1	4616603
chr1	4616627
chr1	4617964
chr1	4618030
chr1	4618102
chr1	4618120
chr1	4618126
chr1	4618268
chr1	4632040
chr1	4635031
chr1	4635826
chr1	4635827
chr1	4636403
chr1	4636478
chr1	4636631
chr1	4636881
chr1	4639522
chr1	4640900
chr1	4641902
chr1	4642727
chr1	4643088
chr1	4647989
chr1	4648131
chr1	4648340
chr1	4648777
chr1	4650878
chr1	4670637
chr1	4672777
chr1	4676135
chr1	4677036
chr1	4677096
chr1	4677167
chr1	4677321
chr1	4677678
chr1	4677900
chr1	4679145
chr1	4679302
chr1	4694126
chr1	4702893
chr1	4714517
chr1	4724852
chr1	4725072
chr1	4725415
chr1	4725578
chr1	4726211
chr1	4727878
chr1	4728253
chr1	4730587
chr1	4731461
chr1	4731469
chr1	4731974
chr1	4732275
chr1	4734335
chr1	4735786
chr1	4737799
chr1	4743371
chr1	4743542
chr1	4744225
chr1	4746416
chr1	4747265
chr1	4747301
chr1	4747611
chr1	4747651
chr1	4747951
chr1	4747965
chr1	4747980
chr1	4748016
chr1	4748097
chr1	4748392
chr1	4749857
chr1	4749858
chr1	4749865
chr1	4750283
chr1	4750684
chr1	4750749
chr1	4754352
chr1	4755096
chr1	4755342
chr1	4756747
chr1	4756914
chr1	4757532
chr1	4757679
chr1	4757867
chr1	4761080
chr1	4762516
chr1	4762919
chr1	4763948
chr1	4764260
chr1	4764619
chr1	4764802
chr1	4766423
chr1	4766469
chr1	4766470
chr1	4766702
chr1	4766768
chr1	4774757
chr1	4776551
chr1	4776786
chr1	4777071
chr1	4778701
chr1	4788624
chr1	4792960
chr1	4793650
chr1	4794432
chr1	4794564
chr1	4794591
chr1	4795452
chr1	4795515
chr1	4796462
chr1	4797584
chr1	4798044
chr1	4798100
chr1	4800116
chr1	4800649
chr1	4803151
chr1	4803933
chr1	4804009
chr1	4804067
chr1	4804180
chr1	4805451
chr1	4805801
chr1	4805816
chr1	4806020
chr1	4806039
chr1	4806646
chr1	4807117
chr1	4807168
chr1	4807220
chr1	4811972
chr1	4811981
chr1	4812044
chr1	4812107
chr1	4812116
chr1	4812826
chr1	4813985
chr1	4814582
chr1	4816814
chr1	4816908
chr1	4817247
chr1	4817272
chr1	4817809
chr1	4817820
chr1	4817974
chr1	4818675
chr1	4819484
chr1	4819495
chr1	4820313
chr1	4826242
chr1	4826420
chr1	4826841
chr1	4832019
chr1	4836148
chr1	4836151
chr1	4836335
chr1	4836372
chr1	4836392
chr1	4836576
chr1	4838213
chr1	4842391
chr1	4843286
chr1	4845038
chr1	4863139
chr1	4875390
chr1	4877062
chr1	4881816
chr1	4883236
chr1	4885683
chr1	4886050
chr1	4886182
chr1	4886636
chr1	4888213
chr1	4889469
chr1	4890205
chr1	4890219
chr1	4890660
chr1	4890867
chr1	4891958
chr1	4892019
chr1	4898193
chr1	4911211
chr1	4911291
chr1	4912251
chr1	4913059
chr1	4915763
chr1	4916148
chr1	4916582
chr1	4916692
chr1	4917348
chr1	4917626
chr1	4918129
chr1	4918407
chr1	4919579
chr1	4921288
chr1	4921289
chr1	4924652
chr1	4924775
chr1	4925603
chr1	4927462
chr1	4928110
chr1	4929332
chr1	4934836
chr1	4935397
chr1	4935398
chr1	4935873
chr1	4946664
chr1	4947328
chr1	4962745
chr1	4962747
chr1	4962777
chr1	4962920
chr1	4963367
chr1	4963777
chr1	4963913
chr1	4963917
chr1	4963918
chr1	4964289
chr1	4968353
chr1	4968508
chr1	4968546
chr1	4968885
chr1	4969822
chr1	4969980
chr1	4971147
chr1	4971201
chr1	4972048
chr1	4972803
chr1	4973130
chr1	4974243
chr1	4974533
chr1	4974536
chr1	4974676
chr1	4974683
chr1	4974684
chr1	4974699
chr1	4975566
chr1	4980840
chr1	4983061
chr1	4984607
chr1	4985620
chr1	4985629
chr1	4986038
chr1	4986770
chr1	4986890
chr1	4987048
chr1	4987111
chr1	4990764
chr1	4991641
chr1	4992111
chr1	4992301
chr1	4992615
chr1	4999160
chr1	5000466
chr1	5000555
chr1	5008647
chr1	5008849
chr1	5009163
chr1	5011452
chr1	5012508
chr1	5013243
chr1	5013301
chr1	5014209
chr1	5014381
chr1	5015597
chr1	5015894
chr1	5016057
chr1	5023794
chr1	5023907
chr1	5024216
chr1	5024268
chr1	5024382
chr1	5024540
chr1	5024869
chr1	5025062
chr1	5025095
chr1	5025353
chr1	5025380
chr1	5025384
chr1	5026209
chr1	5026481
chr1	5026542
chr1	5026555
chr1	5026651
chr1	5026765
chr1	5027305
chr1	5027928
chr1	5028415
chr1	5028436
chr1	5028439
chr1	5028477
chr1	5028487
chr1	5028532
chr1	5028539
chr1	5028577
chr1	5028616
chr1	5028682
chr1	5028701
chr1	5028805
chr1	5028811
chr1	5028889
chr1	5028955
chr1	5029189
chr1	5029225
chr1	5029525
chr1	5029699
chr1	5029702
chr1	5029841
chr1	5030274
chr1	5030762
chr1	5031045
chr1	5031122
chr1	5031123
chr1	5031318
chr1	5031345
chr1	5031498
chr1	5031532
chr1	5032956
chr1	5032960
chr1	5033077
chr1	5033254
chr1	5033292
chr1	5033304
chr1	5033354
chr1	5033389
chr1	5033413
chr1	5033635
chr1	5033719
chr1	5033979
chr1	5035182
chr1	5035184
chr1	5035316
chr1	5035428
chr1	5035603
chr1	5035609
chr1	5035826
chr1	5035880
chr1	5036057
chr1	5036223
chr1	5036235
chr1	5036292
chr1	5038757
chr1	5038875
chr1	5038885
chr1	5039578
chr1	5040139
chr1	5040253
chr1	5040327
chr1	5040341
chr1	5040344
chr1	5040398
chr1	5041816
chr1	5041830
chr1	5043332
chr1	5043658
chr1	5044080
chr1	5051870
chr1	5051923
chr1	5052124
chr1	5052189
chr1	5052407
chr1	5052520
chr1	5052528
chr1	5052862
chr1	5053079
chr1	5053247
chr1	5053483
chr1	5053542
chr1	5053734
chr1	5053748
chr1	5053783
chr1	5053784
chr1	5053857
chr1	5054075
chr1	5054084
chr1	5054148
chr1	5054212
chr1	5054223
chr1	5055002
chr1	5055004
chr1	5055068
chr1	5062351
chr1	5067407
chr1	5067655
chr1	5068430
chr1	5075326
chr1	5076809
chr1	5076963
chr1	5077376
chr1	5084027
chr1	5084416
chr1	5084539
chr1	5084602
chr1	5084685
chr1	5084805
chr1	5088712
chr1	5092136
chr1	5095876
chr1	5107491
chr1	5115126
chr1	5115311
chr1	5117606
chr1	5119215
chr1	5123302
chr1	5125595
chr1	5140140
chr1	5140141
chr1	5141854
chr1	5149381
chr1	5149407
chr1	5149536
chr1	5149854
chr1	5149959
chr1	5149974
chr1	5150010
chr1	5150028
chr1	5150076
chr1	5152237
chr1	5157333
chr1	5157747
chr1	5159421
chr1	5159724
chr1	5162205
chr1	5162377
chr1	5164164
chr1	5165609
chr1	5165883
chr1	5166044
chr1	5166286
chr1	5168895
chr1	5169368
chr1	5170479
chr1	5171291
chr1	5171322
chr1	5173306
chr1	5174450
chr1	5175155
chr1	5175721
chr1	5175791
chr1	5176000
chr1	5176168
chr1	5177890
chr1	5178032
chr1	5178089
chr1	5178227
chr1	5178231
chr1	5178362
chr1	5178475
chr1	5178614
chr1	5178773
chr1	5178812
chr1	5179089
chr1	5183929
chr1	5183937
chr1	5186094
chr1	5186608
chr1	5186632
chr1	5186883
chr1	5186887
chr1	5193665
chr1	5193668
chr1	5199397
chr1	5200448
chr1	5201201
chr1	5206122
chr1	5216635
chr1	5217696
chr1	5217846
chr1	5218254
chr1	5218618
chr1	5222391
chr1	5222970
chr1	5225296
chr1	5226453
chr1	5226458
chr1	5226511
chr1	5226672
chr1	5226852
chr1	5227077
chr1	5227818
chr1	5227855
chr1	5228415
chr1	5229828
chr1	5230427
chr1	5230428
chr1	5231026
chr1	5239114
chr1	5239237
chr1	5239960
chr1	5240144
chr1	5240782
chr1	5242397
chr1	5242421
chr1	5244775
chr1	5245581
chr1	5245916
chr1	5247210
chr1	5247245
chr1	5248474
chr1	5248703
chr1	5248859
chr1	5249120
chr1	5249290
chr1	5250700
chr1	5250703
chr1	5251050
chr1	5251055
chr1	5251081
chr1	5251380
chr1	5251682
chr1	5251816
chr1	5252503
chr1	5252759
chr1	5253318
chr1	5254420
chr1	5254890
chr1	5255772
chr1	5256021
chr1	5256102
chr1	5256310
chr1	5256357
chr1	5256442
chr1	5256564
chr1	5257249
chr1	5257284
chr1	5257974
chr1	5262049
chr1	5262299
chr1	5266098
chr1	5266193
chr1	5266382
chr1	5266496
chr1	5266564
chr1	5267019
chr1	5267020
chr1	5267055
chr1	5267140
chr1	5267280
chr1	5267281
chr1	5267369
chr1	5269660
chr1	5269830
chr1	5275565
chr1	5276543
chr1	5277179
chr1	5278846
chr1	5278971
chr1	5287931
chr1	5287979
chr1	5288122
chr1	5291734
chr1	5292074
chr1	5292170
chr1	5294788
chr1	5294815
chr1	5294865
chr1	5294908
chr1	5296106
chr1	5296130
chr1	5296312
chr1	5296831
chr1	5298060
chr1	5298157
chr1	5300481
chr1	5302058
chr1	5302106
chr1	5302361
chr1	5304702
chr1	5304916
chr1	5304965
chr1	5305090
chr1	5305118
chr1	5305424
chr1	5305984
chr1	5306234
chr1	5307006
chr1	5307486
chr1	5308062
chr1	5308777
chr1	5309110
chr1	5315674
chr1	5317663
chr1	5318747
chr1	5319082
chr1	5319304
chr1	5321742
chr1	5322043
chr1	5322083
chr1	5326201
chr1	5327970
chr1	5328706
chr1	5330975
chr1	5331390
chr1	5331449
chr1	5333529
chr1	5334686
chr1	5335212
chr1	5335357
chr1	5335758
chr1	5336004
chr1	5340983
chr1	5341749
chr1	5341772
chr1	5363510
chr1	5382086
chr1	5382319
chr1	5382704
chr1	5382736
chr1	5382959
chr1	5383252
chr1	5383311
chr1	5383352
chr1	5383415
chr1	5383578
chr1	5383722
chr1	5383989
chr1	5383991
chr1	5384392
chr1	5384394
chr1	5384523
chr1	5384612
chr1	5384756
chr1	5389958
chr1	5390488
chr1	5390601
chr1	5391409
chr1	5399032
chr1	5399243
chr1	5399455
chr1	5400208
chr1	5400473
chr1	5401289
chr1	5401735
chr1	5401801
chr1	5401805
chr1	5402303
chr1	5402493
chr1	5402620
chr1	5403687
chr1	5404870
chr1	5404915
chr1	5404918
chr1	5405488
chr1	5405563
chr1	5405614
chr1	5405646
chr1	5405678
chr1	5405679
chr1	5406187
chr1	5406208
chr1	5406281
chr1	5406292
chr1	5406297
chr1	5406365
chr1	5406386
chr1	5406425
chr1	5406473
chr1	5406511
chr1	5406512
chr1	5406569
chr1	5406602
chr1	5406606
chr1	5406759
chr1	5406842
chr1	5407025
chr1	5407124
chr1	5407154
chr1	5407262
chr1	5407313
chr1	5407403
chr1	5407433
chr1	5408280
chr1	5409251
chr1	5409809
chr1	5409833
chr1	5409854
chr1	5409866
chr1	5411289
chr1	5412348
chr1	5413625
chr1	5414406
chr1	5414592
chr1	5414702
chr1	5414709
chr1	5415043
chr1	5415659
chr1	5415743
chr1	5415818
chr1	5416657
chr1	5417199
chr1	5417483
chr1	5430307
chr1	5430419
chr1	5431828
chr1	5432501
chr1	5432549
chr1	5432758
chr1	5436489
chr1	5439107
chr1	5439109
chr1	5439356
chr1	5439357
chr1	5441422
chr1	5442953
chr1	5443433
chr1	5444956
chr1	5445148
chr1	5445614
chr1	5445976
chr1	5446023
chr1	5446460
chr1	5448197
chr1	5451497
chr1	5451516
chr1	5451589
chr1	5451703
chr1	5451730
chr1	5451738
chr1	5451764
chr1	5451861
chr1	5451945
chr1	5451977
chr1	5452260
chr1	5452261
chr1	5452273
chr1	5452438
chr1	5452439
chr1	5455001
chr1	5456106
chr1	5456672
chr1	5457355
chr1	5458910
chr1	5458949
chr1	5459026
chr1	5459111
chr1	5459136
chr1	5459140
chr1	5459348
chr1	5459621
chr1	5459690
chr1	5459701
chr1	5460096
chr1	5460099
chr1	5460108
chr1	5460153
chr1	5464544
chr1	5464563
chr1	5464706
chr1	5464709
chr1	5464828
chr1	5467761
chr1	5469687
chr1	5469834
chr1	5470447
chr1	5471530
chr1	5472311
chr1	5472421
chr1	5472617
chr1	5476066
chr1	5476078
chr1	5477738
chr1	5478155
chr1	5479290
chr1	5480264
chr1	5480273
chr1	5480375
chr1	5480805
chr1	5481876
chr1	5481877
chr1	5488152
chr1	5495189
chr1	5495857
chr1	5499732
chr1	5499935
chr1	5500959
chr1	5502869
chr1	5504489
chr1	5504917
chr1	5505099
chr1	5511330
chr1	5515569
chr1	5515800
chr1	5517556
chr1	5534536
chr1	5539494
chr1	5539499
chr1	5539529
chr1	5540601
chr1	5541131
chr1	5542280
chr1	5543755
chr1	5544228
chr1	5544229
chr1	5546439
chr1	5546575
chr1	5553868
chr1	5556778
chr1	5557379
chr1	5557645
chr1	5558028
chr1	5558104
chr1	5558655
chr1	5558926
chr1	5559283
chr1	5563384
chr1	5563471
chr1	5565275
chr1	5568049
chr1	5568511
chr1	5569520
chr1	5570373
chr1	5570442
chr1	5576461
chr1	5576827
chr1	5577106
chr1	5581309
chr1	5586316
chr1	5588488
chr1	5592182
chr1	5592880
chr1	5618484
chr1	5618530
chr1	5618964
chr1	5619013
chr1	5619023
chr1	5619161
chr1	5619754
chr1	5619884
chr1	5619925
chr1	5620082
chr1	5620083
chr1	5620127
chr1	5620527
chr1	5620625
chr1	5621358
chr1	5621728
chr1	5627619
chr1	5628384
chr1	5639760
chr1	5647731
chr1	5647747
chr1	5649443
chr1	5651032
chr1	5660375
chr1	5660378
chr1	5660463
chr1	5660491
chr1	5660636
chr1	5661032
chr1	5661092
chr1	5661104
chr1	5661328
chr1	5661426
chr1	5662984
chr1	5662993
chr1	5663001
chr1	5663217
chr1	5664090
chr1	5664255
chr1	5664600
chr1	5664624
chr1	5664944
chr1	5665123
chr1	5665606
chr1	5665640
chr1	5665682
chr1	5665888
chr1	5665925
chr1	5666131
chr1	5666155
chr1	5666197
chr1	5666432
chr1	5666466
chr1	5666489
chr1	5666501
chr1	5666657
chr1	5666836
chr1	5666887
chr1	5666890
chr1	5666945
chr1	5667004
chr1	5667164
chr1	5667278
chr1	5667497
chr1	5667653
chr1	5667662
chr1	5667755
chr1	5667797
chr1	5667800
chr1	5668174
chr1	5668497
chr1	5668564
chr1	5668981
chr1	5668984
chr1	5669201
chr1	5669263
chr1	5669333
chr1	5669470
chr1	5669582
chr1	5669621
chr1	5669824
chr1	5669871
chr1	5669878
chr1	5670376
chr1	5670386
chr1	5670415
chr1	5670416
chr1	5670592
chr1	5670679
chr1	5670684
chr1	5670848
chr1	5670852
chr1	5671469
chr1	5671547
chr1	5671900
chr1	5672520
chr1	5672870
chr1	5674030
chr1	5674328
chr1	5674336
chr1	5674434
chr1	5674439
chr1	5674532
chr1	5674837
chr1	5674864
chr1	5674898
chr1	5674993
chr1	5675033
chr1	5675067
chr1	5675068
chr1	5675790
chr1	5675808
chr1	5675998
chr1	5676084
chr1	5676108
chr1	5676123
chr1	5676156
chr1	5676173
chr1	5676227
chr1	5676275
chr1	5676624
chr1	5676714
chr1	5676761
chr1	5676775
chr1	5676778
chr1	5676927
chr1	5677217
chr1	5677273
chr1	5677679
chr1	5677800
chr1	5678215
chr1	5678217
chr1	5688232
chr1	5688419
chr1	5690704
chr1	5691189
chr1	5698746
chr1	5699779
chr1	5702370
chr1	5706102
chr1	5706333
chr1	5709170
chr1	5710105
chr1	5714148
chr1	5714306
chr1	5718522
chr1	5720348
chr1	5721614
chr1	5723369
chr1	5726276
chr1	5726649
chr1	5726656
chr1	5727272
chr1	5727276
chr1	5729030
chr1	5729304
chr1	5731137
chr1	5731350
chr1	5738236
chr1	5738319
chr1	5738468
chr1	5738539
chr1	5739228
chr1	5739467
chr1	5741275
chr1	5742147
chr1	5742983
chr1	5742987
chr1	5744619
chr1	5744719
chr1	5744775
chr1	5745525
chr1	5746242
chr1	5746335
chr1	5746930
chr1	5747617
chr1	5747944
chr1	5748052
chr1	5748402
chr1	5749083
chr1	5750033
chr1	5750259
chr1	5750405
chr1	5750989
chr1	5751139
chr1	5752047
chr1	5753618
chr1	5753933
chr1	5755662
chr1	5755992
chr1	5755999
chr1	5756491
chr1	5756496
chr1	5756698
chr1	5756742
chr1	5756750
chr1	5756792
chr1	5756794
chr1	5759023
chr1	5759344
chr1	5759585
chr1	5760717
chr1	5760808
chr1	5761093
chr1	5762805
chr1	5762904
chr1	5763046
chr1	5763053
chr1	5763070
chr1	5763106
chr1	5763362
chr1	5763390
chr1	5763432
chr1	5763453
chr1	5763631
chr1	5763685
chr1	5763781
chr1	5763787
chr1	5763793
chr1	5763862
chr1	5763871
chr1	5763960
chr1	5763972
chr1	5764909
chr1	5764994
chr1	5765026
chr1	5765077
chr1	5765254
chr1	5765510
chr1	5768511
chr1	5769983
chr1	5770502
chr1	5770872
chr1	5771704
chr1	5772115
chr1	5773105
chr1	5773120
chr1	5774765
chr1	5779086
chr1	5779201
chr1	5779207
chr1	5779209
chr1	5779252
chr1	5779545
chr1	5779652
chr1	5779791
chr1	5779815
chr1	5779919
chr1	5779998
chr1	5780053
chr1	5780138
chr1	5780288
chr1	5780357
chr1	5780366
chr1	5780774
chr1	5780979
chr1	5780982
chr1	5780990
chr1	5781120
chr1	5781713
chr1	5782209
chr1	5782322
chr1	5786911
chr1	5787849
chr1	5787852
chr1	5787894
chr1	5787931
chr1	5787943
chr1	5787946
chr1	5788313
chr1	5788694
chr1	5788762
chr1	5788855
chr1	5789100
chr1	5789152
chr1	5789886
chr1	5789889
chr1	5790027
chr1	5790097
chr1	5790222
chr1	5790308
chr1	5791543
chr1	5801216
chr1	5803017
chr1	5804021
chr1	5817391
chr1	5817473
chr1	5817489
chr1	5818103
chr1	5818363
chr1	5818410
chr1	5820348
chr1	5820666
chr1	5821406
chr1	5825314
chr1	5825854
chr1	5826410
chr1	5826648
chr1	5826747
chr1	5830159
chr1	5830946
chr1	5832720
chr1	5833890
chr1	5834005
chr1	5834040
chr1	5834140
chr1	5834307
chr1	5834923
chr1	5835094
chr1	5837861
chr1	5837862
chr1	5837944
chr1	5838045
chr1	5838071
chr1	5838544
chr1	5838738
chr1	5838843
chr1	5838885
chr1	5838926
chr1	5839308
chr1	5839740
chr1	5839758
chr1	5839827
chr1	5839917
chr1	5840161
chr1	5840225
chr1	5840234
chr1	5840372
chr1	5840961
chr1	5841117
chr1	5841183
chr1	5843994
chr1	5844563
chr1	5848499
chr1	5848946
chr1	5849198
chr1	5849998
chr1	5850011
chr1	5850684
chr1	5850734
chr1	5852000
chr1	5853037
chr1	5853070
chr1	5853221
chr1	5853254
chr1	5853467
chr1	5853601
chr1	5853703
chr1	5853704
chr1	5853744
chr1	5853747
chr1	5853763
chr1	5853889
chr1	5853895
chr1	5854186
chr1	5854281
chr1	5854338
chr1	5854446
chr1	5855468
chr1	5856047
chr1	5856115
chr1	5856122
chr1	5856297
chr1	5856313
chr1	5856319
chr1	5856332
chr1	5856361
chr1	5856373
chr1	5856874
chr1	5856875
chr1	5856938
chr1	5856944
chr1	5857187
chr1	5857493
chr1	5858310
chr1	5860158
chr1	5860266
chr1	5860298
chr1	5860312
chr1	5860541
chr1	5860573
chr1	5860860
chr1	5860862
chr1	5860872
chr1	5861395
chr1	5861400
chr1	5861471
chr1	5861476
chr1	5861800
chr1	5862082
chr1	5863596
chr1	5863731
chr1	5864002
chr1	5868031
chr1	5868085
chr1	5868184
chr1	5868271
chr1	5868292
chr1	5868557
chr1	5868590
chr1	5868620
chr1	5868865
chr1	5869016
chr1	5869978
chr1	5875957
chr1	5876257
chr1	5876375
chr1	5876376
chr1	5876400
chr1	5876491
chr1	5876510
chr1	5876516
chr1	5879703
chr1	5880203
chr1	5880738
chr1	5880781
chr1	5881600
chr1	5881960
chr1	5882055
chr1	5882376
chr1	5882419
chr1	5882464
chr1	5882876
chr1	5882892
chr1	5882909
chr1	5882983
chr1	5883515
chr1	5883534
chr1	5884057
chr1	5884059
chr1	5884198
chr1	5884216
chr1	5884239
chr1	5885320
chr1	5885805
chr1	5885844
chr1	5885863
chr1	5885979
chr1	5886070
chr1	5886075
chr1	5886082
chr1	5886126
chr1	5886129
chr1	5886225
chr1	5886274
chr1	5886441
chr1	5886501
chr1	5886513
chr1	5886517
chr1	5886537
chr1	5886594
chr1	5886618
chr1	5886906
chr1	5887057
chr1	5887798
chr1	5889208
chr1	5890879
chr1	5893006
chr1	5894051
chr1	5894339
chr1	5894499
chr1	5909371
chr1	5909378
chr1	5909616
chr1	5910295
chr1	5910740
chr1	5911545
chr1	5918629
chr1	5921154
chr1	5922701
chr1	5924160
chr1	5924405
chr1	5924553
chr1	5924568
chr1	5924798
chr1	5925007
chr1	5925058
chr1	5925361
chr1	5925576
chr1	5925594
chr1	5925713
chr1	5925770
chr1	5925791
chr1	5925820
chr1	5925839
chr1	5926015
chr1	5926113
chr1	5926211
chr1	5926266
chr1	5926320
chr1	5926337
chr1	5930109
chr1	5930112
chr1	5930340
chr1	5930751
chr1	5930768
chr1	5930845
chr1	5930854
chr1	5930887
chr1	5931162
chr1	5931270
chr1	5933943
chr1	5933969
chr1	5934241
chr1	5935805
chr1	5937663
chr1	5938143
chr1	5940523
chr1	5940614
chr1	5940627
chr1	5940735
chr1	5940758
chr1	5940848
chr1	5940856
chr1	5940860
chr1	5940875
chr1	5941011
chr1	5941030
chr1	5941049
chr1	5941055
chr1	5941061
chr1	5941107
chr1	5941170
chr1	5941174
chr1	5941177
chr1	5941273
chr1	5941278
chr1	5941331
chr1	5942218
chr1	5942414
chr1	5942800
chr1	5942833
chr1	5943040
chr1	5943255
chr1	5943274
chr1	5943680
chr1	5943700
chr1	5943813
chr1	5944164
chr1	5944179
chr1	5944200
chr1	5944206
chr1	5946956
chr1	5947485
chr1	5947836
chr1	5948145
chr1	5948539
chr1	5949110
chr1	5949972
chr1	5950046
chr1	5950483
chr1	5950766
chr1	5951494
chr1	5954022
chr1	5954450
chr1	5954796
chr1	5954869
chr1	5969694
chr1	5969759
chr1	5970920
chr1	5975457
chr1	5975625
chr1	5975660
chr1	5977724
chr1	5978674
chr1	5978806
chr1	5979385
chr1	5979924
chr1	5979948
chr1	5979966
chr1	5980101
chr1	5980674
chr1	5980745
chr1	5980748
chr1	5980763
chr1	5981216
chr1	5982609
chr1	5982618
chr1	5982622
chr1	5982666
chr1	5982680
chr1	5982803
chr1	5983015
chr1	5983033
chr1	5983847
chr1	5983880
chr1	5983910
chr1	5983926
chr1	5984083
chr1	5984467
chr1	5984479
chr1	5984683
chr1	5984867
chr1	5984869
chr1	5985405
chr1	5985459
chr1	5985508
chr1	5985540
chr1	5985603
chr1	5985753
chr1	5986014
chr1	5986156
chr1	5986504
chr1	5986966
chr1	5987058
chr1	5989837
chr1	5990002
chr1	5991204
chr1	5991353
chr1	5991963
chr1	5992513
chr1	5992551
chr1	5994055
chr1	5994109
chr1	5994160
chr1	5996213
chr1	5997774
chr1	5998395
chr1	5998856
chr1	5998898
chr1	6000509
chr1	6001155
chr1	6001545
chr1	6001598
chr1	6001732
chr1	6001737
chr1	6002091
chr1	6002468
chr1	6005666
chr1	6007175
chr1	6008608
chr1	6008722
chr1	6008739
chr1	6018064
chr1	6018067
chr1	6018257
chr1	6018981
chr1	6020840
chr1	6021924
chr1	6023301
chr1	6023568
chr1	6025043
chr1	6025331
chr1	6025673
chr1	6025680
chr1	6025815
chr1	6027227
chr1	6027335
chr1	6034555
chr1	6034733
chr1	6034755
chr1	6034913
chr1	6035414
chr1	6036233
chr1	6036469
chr1	6037159
chr1	6037546
chr1	6039432
chr1	6043314
chr1	6047942
chr1	6050464
chr1	6050975
chr1	6052238
chr1	6052391
chr1	6062468
chr1	6062597
chr1	6062641
chr1	6062645
chr1	6062699
chr1	6062735
chr1	6062740
chr1	6062750
chr1	6062762
chr1	6062852
chr1	6062933
chr1	6062963
chr1	6062978
chr1	6063009
chr1	6063077
chr1	6064822
chr1	6066071
chr1	6069028
chr1	6069768
chr1	6070465
chr1	6070569
chr1	6071408
chr1	6072661
chr1	6072771
chr1	6072790
chr1	6077459
chr1	6077781
chr1	6081825
chr1	6081977
chr1	6082191
chr1	6083872
chr1	6086245
chr1	6087206
chr1	6087849
chr1	6088167
chr1	6093397
chr1	6093401
chr1	6095071
chr1	6095330
chr1	6095662
chr1	6095918
chr1	6096328
chr1	6096912
chr1	6099447
chr1	6099640
chr1	6110143
chr1	6110149
chr1	6110304
chr1	6110331
chr1	6110377
chr1	6110680
chr1	6110700
chr1	6110953
chr1	6110976
chr1	6110991
chr1	6111179
chr1	6111278
chr1	6111461
chr1	6111520
chr1	6111531
chr1	6112445
chr1	6112448
chr1	6112588
chr1	6112698
chr1	6112741
chr1	6113606
chr1	6114594
chr1	6114793
chr1	6115065
chr1	6116096
chr1	6116255
chr1	6116342
chr1	6123757
chr1	6124399
chr1	6124404
chr1	6124416
chr1	6124469
chr1	6124974
chr1	6125012
chr1	6125108
chr1	6125119
chr1	6125334
chr1	6125562
chr1	6125642
chr1	6125644
chr1	6126178
chr1	6126433
chr1	6126448
chr1	6126463
chr1	6126773
chr1	6126993
chr1	6127311
chr1	6130202
chr1	6130456
chr1	6130562
chr1	6131358
chr1	6132827
chr1	6133243
chr1	6134485
chr1	6135177
chr1	6136163
chr1	6136650
chr1	6137048
chr1	6137969
chr1	6138087
chr1	6138166
chr1	6138237
chr1	6142726
chr1	6142884
chr1	6142914
chr1	6142995
chr1	6143595
chr1	6143601
chr1	6143646
chr1	6143854
chr1	6144240
chr1	6144358
chr1	6144367
chr1	6144541
chr1	6144607
chr1	6144768
chr1	6145059
chr1	6145152
chr1	6145194
chr1	6145405
chr1	6145414
chr1	6145609
chr1	6145618
chr1	6145636
chr1	6145651
chr1	6146463
chr1	6146567
chr1	6146790
chr1	6146852
chr1	6146950
chr1	6147321
chr1	6147887
chr1	6148107
chr1	6148252
chr1	6148344
chr1	6148600
chr1	6149448
chr1	6149456
chr1	6149468
chr1	6149478
chr1	6149517
chr1	6149620
chr1	6149653
chr1	6149758
chr1	6150017
chr1	6150162
chr1	6150167
chr1	6150243
chr1	6150249
chr1	6150351
chr1	6151499
chr1	6151931
chr1	6151982
chr1	6151990
chr1	6152225
chr1	6152296
chr1	6152348
chr1	6152397
chr1	6152548
chr1	6152668
chr1	6152719
chr1	6152896
chr1	6153211
chr1	6153217
chr1	6153220
chr1	6153366
chr1	6153393
chr1	6153414
chr1	6154458
chr1	6154541
chr1	6154584
chr1	6154844
chr1	6155129
chr1	6155130
chr1	6155174
chr1	6155219
chr1	6155228
chr1	6155234
chr1	6155270
chr1	6155306
chr1	6155312
chr1	6155324
chr1	6155326
chr1	6155360
chr1	6155366
chr1	6155387
chr1	6155393
chr1	6155586
chr1	6155629
chr1	6155650
chr1	6162321
chr1	6162397
chr1	6162459
chr1	6163815
chr1	6163973
chr1	6165071
chr1	6165322
chr1	6165521
chr1	6166552
chr1	6167641
chr1	6167716
chr1	6167776
chr1	6167839
chr1	6167966
chr1	6168097
chr1	6168124
chr1	6168142
chr1	6168206
chr1	6168442
chr1	6169370
chr1	6169454
chr1	6169519
chr1	6170544
chr1	6171982
chr1	6172021
chr1	6185121
chr1	6189295
chr1	6204892
chr1	6211980
chr1	6217744
chr1	6225655
chr1	6227484
chr1	6228088
chr1	6228374
chr1	6228563
chr1	6229635
chr1	6239358
chr1	6239439
chr1	6239731
chr1	6239894
chr1	6244605
chr1	6245127
chr1	6245659
chr1	6245833
chr1	6245889
chr1	6246002
chr1	6246056
chr1	6246759
chr1	6246771
chr1	6247465
chr1	6248917
chr1	6249197
chr1	6251153
chr1	6251165
chr1	6251921
chr1	6252182
chr1	6252370
chr1	6252957
chr1	6253608
chr1	6254530
chr1	6254560
chr1	6254611
chr1	6255581
chr1	6255582
chr1	6257532
chr1	6258767
chr1	6259244
chr1	6260414
chr1	6260416
chr1	6260567
chr1	6260720
chr1	6267276
chr1	6269656
chr1	6270295
chr1	6271778
chr1	6271986
chr1	6271989
chr1	6272003
chr1	6272180
chr1	6272260
chr1	6277018
chr1	6277306
chr1	6277604
chr1	6278121
chr1	6278678
chr1	6278842
chr1	6278847
chr1	6278990
chr1	6279039
chr1	6279099
chr1	6279480
chr1	6279523
chr1	6279991
chr1	6280726
chr1	6280727
chr1	6281355
chr1	6281586
chr1	6281616
chr1	6281631
chr1	6281666
chr1	6281873
chr1	6281945
chr1	6282597
chr1	6283826
chr1	6283910
chr1	6287481
chr1	6289616
chr1	6290460
chr1	6291189
chr1	6292831
chr1	6297616
chr1	6299730
chr1	6299889
chr1	6299975
chr1	6300056
chr1	6300077
chr1	6300106
chr1	6300120
chr1	6300126
chr1	6300196
chr1	6300236
chr1	6300407
chr1	6300413
chr1	6300420
chr1	6300601
chr1	6300808
chr1	6300820
chr1	6300870
chr1	6300924
chr1	6301080
chr1	6301124
chr1	6303170
chr1	6303228
chr1	6303386
chr1	6303409
chr1	6303633
chr1	6303642
chr1	6303687
chr1	6303703
chr1	6303757
chr1	6303770
chr1	6303814
chr1	6307589
chr1	6307737
chr1	6307772
chr1	6309021
chr1	6309066
chr1	6309262
chr1	6310217
chr1	6311480
chr1	6311481
chr1	6313207
chr1	6313396
chr1	6317458
chr1	6318648
chr1	6319039
chr1	6319068
chr1	6326264
chr1	6326631
chr1	6326800
chr1	6328850
chr1	6336030
chr1	6339854
chr1	6339858
chr1	6343228
chr1	6344522
chr1	6345012
chr1	6346132
chr1	6346187
chr1	6347211
chr1	6347547
chr1	6348613
chr1	6350155
chr1	6350451
chr1	6350716
chr1	6350963
chr1	6351465
chr1	6351776
chr1	6351798
chr1	6351868
chr1	6351936
chr1	6352691
chr1	6352875
chr1	6352888
chr1	6353157
chr1	6353371
chr1	6353468
chr1	6353737
chr1	6353999
chr1	6354210
chr1	6356374
chr1	6358235
chr1	6362475
chr1	6362732
chr1	6362937
chr1	6363252
chr1	6364604
chr1	6365704
chr1	6369745
chr1	6370291
chr1	6372434
chr1	6372623
chr1	6372674
chr1	6372780
chr1	6377432
chr1	6377634
chr1	6377816
chr1	6377971
chr1	6378000
chr1	6378028
chr1	6378061
chr1	6378339
chr1	6381842
chr1	6382266
chr1	6383015
chr1	6384342
chr1	6385828
chr1	6386445
chr1	6386851
chr1	6387016
chr1	6387474
chr1	6389672
chr1	6390659
chr1	6395981
chr1	6396329
chr1	6396840
chr1	6397998
chr1	6402755
chr1	6414595
chr1	6418964
chr1	6419479
chr1	6421438
chr1	6423523
chr1	6423794
chr1	6427791
chr1	6429174
chr1	6430490
chr1	6433226
chr1	6434722
chr1	6436227
chr1	6438607
chr1	6439158
chr1	6443897
chr1	6443949
chr1	6452315
chr1	6457831
chr1	6457893
chr1	6458047
chr1	6458308
chr1	6458371
chr1	6458576
chr1	6458700
chr1	6458736
chr1	6458963
chr1	6458965
chr1	6459003
chr1	6459074
chr1	6459077
chr1	6459096
chr1	6459169
chr1	6459221
chr1	6459461
chr1	6459497
chr1	6459500
chr1	6459527
chr1	6464209
chr1	6465419
chr1	6465478
chr1	6465490
chr1	6465741
chr1	6466266
chr1	6466278
chr1	6466299
chr1	6467054
chr1	6467148
chr1	6469214
chr1	6469262
chr1	6469331
chr1	6469431
chr1	6469805
chr1	6469916
chr1	6475205
chr1	6475363
chr1	6475464
chr1	6475483
chr1	6475522
chr1	6481188
chr1	6483525
chr1	6493915
chr1	6500817
chr1	6502208
chr1	6502855
chr1	6503011
chr1	6503966
chr1	6504067
chr1	6504834
chr1	6525536
chr1	6525667
chr1	6525682
chr1	6525754
chr1	6529116
chr1	6529147
chr1	6529163
chr1	6529168
chr1	6529178
chr1	6529356
chr1	6529538
chr1	6529786
chr1	6529825
chr1	6529856
chr1	6529893
chr1	6529905
chr1	6529932
chr1	6530008
chr1	6530044
chr1	6530070
chr1	6530107
chr1	6530128
chr1	6530225
chr1	6530236
chr1	6530245
chr1	6530366
chr1	6530369
chr1	6530431
chr1	6530521
chr1	6530530
chr1	6530557
chr1	6530581
chr1	6530629
chr1	6530633
chr1	6530794
chr1	6530800
chr1	6531208
chr1	6531342
chr1	6531484
chr1	6531748
chr1	6532558
chr1	6544084
chr1	6544121
chr1	6544211
chr1	6544238
chr1	6544280
chr1	6544298
chr1	6544537
chr1	6544656
chr1	6544734
chr1	6544890
chr1	6545004
chr1	6545085
chr1	6545361
chr1	6545485
chr1	6545487
chr1	6545551
chr1	6545607
chr1	6545640
chr1	6545654
chr1	6546376
chr1	6547924
chr1	6547941
chr1	6548389
chr1	6548887
chr1	6550637
chr1	6551573
chr1	6552008
chr1	6561098
chr1	6566501
chr1	6566551
chr1	6566767
chr1	6568486
chr1	6568488
chr1	6568915
chr1	6569018
chr1	6569043
chr1	6569323
chr1	6569521
chr1	6569684
chr1	6570351
chr1	6570643
chr1	6584516
chr1	6584953
chr1	6585657
chr1	6585877
chr1	6585955
chr1	6590336
chr1	6590492
chr1	6590539
chr1	6591004
chr1	6592210
chr1	6595010
chr1	6595155
chr1	6595156
chr1	6595240
chr1	6595316
chr1	6595674
chr1	6596436
chr1	6599793
chr1	6602305
chr1	6602584
chr1	6605142
chr1	6605695
chr1	6605773
chr1	6608183
chr1	6608281
chr1	6610312
chr1	6610328
chr1	6610527
chr1	6610763
chr1	6612253
chr1	6616767
chr1	6617184
chr1	6617865
chr1	6617898
chr1	6618131
chr1	6618158
chr1	6618557
chr1	6622220
chr1	6622295
chr1	6622362
chr1	6622631
chr1	6622707
chr1	6622734
chr1	6622821
chr1	6622980
chr1	6622990
chr1	6623101
chr1	6623139
chr1	6623446
chr1	6623447
chr1	6623991
chr1	6626693
chr1	6626711
chr1	6626866
chr1	6626896
chr1	6626939
chr1	6627089
chr1	6627129
chr1	6627176
chr1	6627522
chr1	6629178
chr1	6630205
chr1	6630754
chr1	6631393
chr1	6631544
chr1	6631599
chr1	6631815
chr1	6631941
chr1	6631963
chr1	6632496
chr1	6632500
chr1	6643958
chr1	6644282
chr1	6644554
chr1	6644725
chr1	6644746
chr1	6645149
chr1	6645201
chr1	6645247
chr1	6645395
chr1	6646308
chr1	6646374
chr1	6646523
chr1	6647013
chr1	6647296
chr1	6647366
chr1	6649001
chr1	6649431
chr1	6649649
chr1	6650263
chr1	6650319
chr1	6662604
chr1	6664518
chr1	6666375
chr1	6667000
chr1	6667778
chr1	6668825
chr1	6668941
chr1	6672437
chr1	6676691
chr1	6677422
chr1	6677546
chr1	6684974
chr1	6684977
chr1	6686935
chr1	6686957
chr1	6690039
chr1	6691020
chr1	6692053
chr1	6692295
chr1	6693171
chr1	6693437
chr1	6694587
chr1	6698568
chr1	6698578
chr1	6698581
chr1	6698746
chr1	6709948
chr1	6710339
chr1	6710918
chr1	6710993
chr1	6711007
chr1	6711377
chr1	6711484
chr1	6711542
chr1	6711601
chr1	6711788
chr1	6712053
chr1	6712110
chr1	6712399
chr1	6712403
chr1	6713043
chr1	6713074
chr1	6713176
chr1	6713220
chr1	6713230
chr1	6713265
chr1	6713315
chr1	6713350
chr1	6713362
chr1	6713368
chr1	6713461
chr1	6713538
chr1	6713648
chr1	6713736
chr1	6714017
chr1	6714021
chr1	6714027
chr1	6714295
chr1	6725299
chr1	6725432
chr1	6726567
chr1	6726579
chr1	6726697
chr1	6727015
chr1	6727100
chr1	6727241
chr1	6727289
chr1	6727294
chr1	6727330
chr1	6727545
chr1	6728890
chr1	6744457
chr1	6747929
chr1	6750139
chr1	6751854
chr1	6752169
chr1	6752381
chr1	6752882
chr1	6753771
chr1	6755378
chr1	6761453
chr1	6762739
chr1	6764851
chr1	6765349
chr1	6766553
chr1	6766873
chr1	6767004
chr1	6767637
chr1	6767664
chr1	6773523
chr1	6774290
chr1	6776958
chr1	6777344
chr1	6779805
chr1	6779842
chr1	6780200
chr1	6780211
chr1	6780887
chr1	6781469
chr1	6796626
chr1	6796924
chr1	6796933
chr1	6797318
chr1	6797496
chr1	6798848
chr1	6799298
chr1	6800197
chr1	6800683
chr1	6800889
chr1	6800951
chr1	6801439
chr1	6801699
chr1	6802130
chr1	6802527
chr1	6802579
chr1	6805488
chr1	6805567
chr1	6805829
chr1	6806372
chr1	6807015
chr1	6807608
chr1	6807764
chr1	6807831
chr1	6807854
chr1	6807987
chr1	6808240
chr1	6808312
chr1	6809077
chr1	6809401
chr1	6810000
chr1	6810087
chr1	6810213
chr1	6810678
chr1	6810783
chr1	6810785
chr1	6810786
chr1	6810846
chr1	6811465
chr1	6811471
chr1	6815390
chr1	6816872
chr1	6817387
chr1	6817919
chr1	6818659
chr1	6818993
chr1	6822007
chr1	6822619
chr1	6823516
chr1	6823887
chr1	6823892
chr1	6824731
chr1	6825500
chr1	6826920
chr1	6827397
chr1	6828147
chr1	6828165
chr1	6828513
chr1	6828695
chr1	6829882
chr1	6830286
chr1	6832808
chr1	6846512
chr1	6847489
chr1	6847492
chr1	6847909
chr1	6847961
chr1	6848036
chr1	6857150
chr1	6857155
chr1	6857508
chr1	6857594
chr1	6857634
chr1	6857840
chr1	6857909
chr1	6858182
chr1	6858411
chr1	6858611
chr1	6858713
chr1	6858812
chr1	6872460
chr1	6889862
chr1	6890826
chr1	6891565
chr1	6894332
chr1	6896193
chr1	6897195
chr1	6897344
chr1	6913268
chr1	6913595
chr1	6913802
chr1	6914639
chr1	6916659
chr1	6931623
chr1	6933272
chr1	6933471
chr1	6934063
chr1	6935402
chr1	6935603
chr1	6936221
chr1	6936457
chr1	6936510
chr1	6938243
chr1	6941254
chr1	6941861
chr1	6945984
chr1	6946084
chr1	6946224
chr1	6946410
chr1	6946817
chr1	6946858
chr1	6946968
chr1	6949395
chr1	6949437
chr1	6950137
chr1	6950150
chr1	6950178
chr1	6950231
chr1	6950308
chr1	6950309
chr1	6950735
chr1	6950944
chr1	6958307
chr1	6958325
chr1	6967039
chr1	6967219
chr1	6967312
chr1	6968274
chr1	6969456
chr1	6969618
chr1	6970007
chr1	6970424
chr1	6970501
chr1	6970551
chr1	6970845
chr1	6970886
chr1	6971724
chr1	6971737
chr1	6971790
chr1	6971821
chr1	6971856
chr1	6971921
chr1	6971937
chr1	6972021
chr1	6972211
chr1	6972224
chr1	6972251
chr1	6972285
chr1	6972288
chr1	6972298
chr1	6972321
chr1	6972357
chr1	6972366
chr1	6972453
chr1	6972708
chr1	6972724
chr1	6972727
chr1	6972902
chr1	6973091
chr1	6973144
chr1	6973266
chr1	6973309
chr1	6973539
chr1	6973772
chr1	6973793
chr1	6973819
chr1	6973903
chr1	6974265
chr1	6974340
chr1	6974564
chr1	6974582
chr1	6974662
chr1	6974810
chr1	6974861
chr1	6986504
chr1	6986834
chr1	6987183
chr1	7001208
chr1	7001415
chr1	7001507
chr1	7001667
chr1	7001772
chr1	7001941
chr1	7001964
chr1	7001968
chr1	7001969
chr1	7002193
chr1	7002298
chr1	7002383
chr1	7002611
chr1	7003096
chr1	7003894
chr1	7004125
chr1	7004193
chr1	7004223
chr1	7004862
chr1	7004951
chr1	7005021
chr1	7005318
chr1	7005398
chr1	7005407
chr1	7005425
chr1	7005828
chr1	7006036
chr1	7006082
chr1	7006286
chr1	7006326
chr1	7006527
chr1	7006587
chr1	7007918
chr1	7007969
chr1	7008029
chr1	7008041
chr1	7008098
chr1	7008122
chr1	7008156
chr1	7008285
chr1	7008491
chr1	7008494
chr1	7008572
chr1	7008736
chr1	7010325
chr1	7010612
chr1	7011441
chr1	7011675
chr1	7011928
chr1	7018049
chr1	7018459
chr1	7018615
chr1	7018708
chr1	7020492
chr1	7020973
chr1	7021172
chr1	7021733
chr1	7021767
chr1	7021924
chr1	7022171
chr1	7022353
chr1	7022383
chr1	7022741
chr1	7022861
chr1	7029784
chr1	7029877
chr1	7029940
chr1	7029979
chr1	7029984
chr1	7029986
chr1	7030025
chr1	7030042
chr1	7030078
chr1	7030142
chr1	7030157
chr1	7030354
chr1	7030375
chr1	7030390
chr1	7030445
chr1	7030454
chr1	7030657
chr1	7030831
chr1	7030843
chr1	7031062
chr1	7031146
chr1	7031245
chr1	7031257
chr1	7031315
chr1	7031358
chr1	7031415
chr1	7031963
chr1	7032178
chr1	7032262
chr1	7032433
chr1	7032454
chr1	7032478
chr1	7032484
chr1	7032495
chr1	7032576
chr1	7032582
chr1	7032598
chr1	7032729
chr1	7032736
chr1	7032746
chr1	7032925
chr1	7033065
chr1	7033469
chr1	7033675
chr1	7039286
chr1	7039298
chr1	7039358
chr1	7039418
chr1	7039595
chr1	7039661
chr1	7039937
chr1	7040024
chr1	7040044
chr1	7040103
chr1	7059467
chr1	7059571
chr1	7062220
chr1	7062221
chr1	7064616
chr1	7068978
chr1	7069008
chr1	7069013
chr1	7071918
chr1	7079369
chr1	7080686
chr1	7081281
chr1	7081296
chr1	7081458
chr1	7083175
chr1	7083250
chr1	7083308
chr1	7083331
chr1	7083480
chr1	7083483
chr1	7083486
chr1	7083537
chr1	7083777
chr1	7084389
chr1	7084893
chr1	7085727
chr1	7088348
chr1	7088986
chr1	7089021
chr1	7089072
chr1	7089109
chr1	7091324
chr1	7091503
chr1	7091829
chr1	7092295
chr1	7092915
chr1	7093253
chr1	7093322
chr1	7094444
chr1	7094447
chr1	7094546
chr1	7094657
chr1	7096181
chr1	7098190
chr1	7098512
chr1	7098538
chr1	7098557
chr1	7098617
chr1	7098646
chr1	7098678
chr1	7098680
chr1	7098692
chr1	7099114
chr1	7099121
chr1	7099136
chr1	7099139
chr1	7099169
chr1	7099243
chr1	7099274
chr1	7099304
chr1	7099313
chr1	7099316
chr1	7099631
chr1	7102735
chr1	7103506
chr1	7103872
chr1	7104100
chr1	7104356
chr1	7106196
chr1	7106201
chr1	7106673
chr1	7107377
chr1	7114189
chr1	7114239
chr1	7114538
chr1	7115006
chr1	7115392
chr1	7115887
chr1	7116017
chr1	7116690
chr1	7116979
chr1	7117299
chr1	7117305
chr1	7118094
chr1	7118095
chr1	7118107
chr1	7119513
chr1	7120299
chr1	7120572
chr1	7120759
chr1	7121513
chr1	7122124
chr1	7122249
chr1	7122501
chr1	7123908
chr1	7124049
chr1	7124328
chr1	7124343
chr1	7124588
chr1	7124896
chr1	7127287
chr1	7129005
chr1	7129017
chr1	7129423
chr1	7129489
chr1	7130309
chr1	7135299
chr1	7136141
chr1	7136539
chr1	7137242
chr1	7143116
chr1	7144428
chr1	7145380
chr1	7145747
chr1	7146305
chr1	7146709
chr1	7146782
chr1	7146865
chr1	7147595
chr1	7149136
chr1	7152703
chr1	7154802
chr1	7154803
chr1	7155762
chr1	7156759
chr1	7157497
chr1	7157751
chr1	7158710
chr1	7159479
chr1	7159600
chr1	7159690
chr1	7164171
chr1	7164237
chr1	7164474
chr1	7164475
chr1	7165028
chr1	7165158
chr1	7165376
chr1	7165382
chr1	7165612
chr1	7165666
chr1	7165702
chr1	7165735
chr1	7165768
chr1	7166801
chr1	7167336
chr1	7167339
chr1	7167538
chr1	7167544
chr1	7167549
chr1	7174582
chr1	7174610
chr1	7175004
chr1	7175119
chr1	7175140
chr1	7175411
chr1	7175424
chr1	7175613
chr1	7175615
chr1	7176914
chr1	7176949
chr1	7177170
chr1	7177200
chr1	7178085
chr1	7178304
chr1	7178770
chr1	7178776
chr1	7180107
chr1	7180170
chr1	7180305
chr1	7180962
chr1	7181213
chr1	7181239
chr1	7181261
chr1	7181405
chr1	7181514
chr1	7185812
chr1	7186387
chr1	7189027
chr1	7189899
chr1	7210388
chr1	7210428
chr1	7210439
chr1	7213061
chr1	7214422
chr1	7218120
chr1	7219469
chr1	7226214
chr1	7226376
chr1	7227405
chr1	7232266
chr1	7232267
chr1	7232906
chr1	7232909
chr1	7232951
chr1	7232957
chr1	7233352
chr1	7234471
chr1	7234896
chr1	7234941
chr1	7235033
chr1	7238897
chr1	7238999
chr1	7239038
chr1	7239403
chr1	7243177
chr1	7243468
chr1	7243691
chr1	7243770
chr1	7244293
chr1	7244747
chr1	7244832
chr1	7245076
chr1	7245098
chr1	7245287
chr1	7245302
chr1	7245326
chr1	7245338
chr1	7245652
chr1	7246142
chr1	7246291
chr1	7246337
chr1	7246823
chr1	7247078
chr1	7247192
chr1	7247228
chr1	7247363
chr1	7259471
chr1	7262061
chr1	7263517
chr1	7264425
chr1	7265941
chr1	7266275
chr1	7267068
chr1	7267082
chr1	7267155
chr1	7267199
chr1	7267270
chr1	7272853
chr1	7273514
chr1	7274158
chr1	7277036
chr1	7277509
chr1	7278815
chr1	7280758
chr1	7280941
chr1	7288433
chr1	7298491
chr1	7300825
chr1	7301784
chr1	7303092
chr1	7303671
chr1	7304587
chr1	7305120
chr1	7306461
chr1	7307680
chr1	7307977
chr1	7308149
chr1	7308577
chr1	7309198
chr1	7309218
chr1	7314635
chr1	7315732
chr1	7316679
chr1	7317637
chr1	7318278
chr1	7318560
chr1	7318766
chr1	7319258
chr1	7320027
chr1	7327045
chr1	7327906
chr1	7328037
chr1	7328295
chr1	7328297
chr1	7329055
chr1	7329164
chr1	7329176
chr1	7338821
chr1	7346304
chr1	7346313
chr1	7346356
chr1	7346381
chr1	7346457
chr1	7346568
chr1	7346697
chr1	7346946
chr1	7373779
chr1	7373986
chr1	7374082
chr1	7374339
chr1	7375734
chr1	7379254
chr1	7379707
chr1	7381538
chr1	7381681
chr1	7381728
chr1	7382314
chr1	7384835
chr1	7384858
chr1	7385164
chr1	7385219
chr1	7385928
chr1	7406327
chr1	7406669
chr1	7406787
chr1	7407649
chr1	7408557
chr1	7411184
chr1	7411460
chr1	7411744
chr1	7411745
chr1	7411890
chr1	7412123
chr1	7412420
chr1	7413321
chr1	7415068
chr1	7415932
chr1	7418698
chr1	7419721
chr1	7419800
chr1	7419967
chr1	7419994
chr1	7420010
chr1	7420055
chr1	7420079
chr1	7420234
chr1	7420336
chr1	7420338
chr1	7420629
chr1	7422709
chr1	7422721
chr1	7423110
chr1	7423378
chr1	7442613
chr1	7442788
chr1	7448079
chr1	7448361
chr1	7453423
chr1	7453798
chr1	7453902
chr1	7454066
chr1	7465117
chr1	7469413
chr1	7478460
chr1	7478759
chr1	7484303
chr1	7486453
chr1	7488495
chr1	7488541
chr1	7489364
chr1	7489427
chr1	7489629
chr1	7490393
chr1	7490438
chr1	7493293
chr1	7493491
chr1	7493520
chr1	7493594
chr1	7494758
chr1	7495420
chr1	7497691
chr1	7502340
chr1	7502367
chr1	7509613
chr1	7512877
chr1	7513163
chr1	7513307
chr1	7519895
chr1	7519906
chr1	7521394
chr1	7555657
chr1	7557615
chr1	7557650
chr1	7559479
chr1	7560102
chr1	7560340
chr1	7571415
chr1	7571862
chr1	7571982
chr1	7572856
chr1	7581342
chr1	7582653
chr1	7583772
chr1	7586608
chr1	7590189
chr1	7593633
chr1	7602632
chr1	7602911
chr1	7603949
chr1	7606241
chr1	7606725
chr1	7607682
chr1	7608196
chr1	7608555
chr1	7610778
chr1	7610831
chr1	7610846
chr1	7610870
chr1	7611095
chr1	7611209
chr1	7611265
chr1	7611273
chr1	7611315
chr1	7613410
chr1	7613927
chr1	7614131
chr1	7615058
chr1	7616224
chr1	7617861
chr1	7619429
chr1	7619630
chr1	7620059
chr1	7620215
chr1	7620642
chr1	7620846
chr1	7621237
chr1	7621238
chr1	7621600
chr1	7622644
chr1	7624464
chr1	7624792
chr1	7625408
chr1	7625409
chr1	7625905
chr1	7626009
chr1	7626903
chr1	7627517
chr1	7627634
chr1	7634981
chr1	7635026
chr1	7635600
chr1	7636148
chr1	7641763
chr1	7641771
chr1	7641834
chr1	7641897
chr1	7641926
chr1	7641996
chr1	7642030
chr1	7642257
chr1	7642410
chr1	7642422
chr1	7642488
chr1	7642512
chr1	7642527
chr1	7642780
chr1	7643043
chr1	7643078
chr1	7643097
chr1	7643711
chr1	7643745
chr1	7643985
chr1	7644110
chr1	7644164
chr1	7644307
chr1	7644325
chr1	7644401
chr1	7644442
chr1	7644475
chr1	7644523
chr1	7644916
chr1	7644973
chr1	7644994
chr1	7645089
chr1	7645829
chr1	7645835
chr1	7646309
chr1	7646698
chr1	7647175
chr1	7647205
chr1	7647827
chr1	7648461
chr1	7650142
chr1	7650153
chr1	7651133
chr1	7652896
chr1	7653884
chr1	7654347
chr1	7666718
chr1	7667459
chr1	7681343
chr1	7681376
chr1	7682106
chr1	7691220
chr1	7691846
chr1	7692322
chr1	7697183
chr1	7704294
chr1	7704631
chr1	7705531
chr1	7705541
chr1	7705624
chr1	7705717
chr1	7713282
chr1	7714319
chr1	7736611
chr1	7736907
chr1	7737582
chr1	7737603
chr1	7754451
chr1	7754490
chr1	7754826
chr1	7755066
chr1	7755911
chr1	7756296
chr1	7768384
chr1	7770033
chr1	7771853
chr1	7771904
chr1	7773025
chr1	7773140
chr1	7776432
chr1	7777203
chr1	7777957
chr1	7778716
chr1	7779399
chr1	7779701
chr1	7779963
chr1	7780198
chr1	7789625
chr1	7789803
chr1	7789939
chr1	7790287
chr1	7791342
chr1	7791546
chr1	7791692
chr1	7796024
chr1	7796653
chr1	7797023
chr1	7797165
chr1	7797177
chr1	7797367
chr1	7797400
chr1	7801720
chr1	7801860
chr1	7802090
chr1	7802204
chr1	7815032
chr1	7815033
chr1	7815544
chr1	7815610
chr1	7823227
chr1	7826769
chr1	7826771
chr1	7827029
chr1	7827221
chr1	7827269
chr1	7827273
chr1	7827278
chr1	7828399
chr1	7829228
chr1	7829473
chr1	7829636
chr1	7837062
chr1	7837208
chr1	7837724
chr1	7837809
chr1	7837823
chr1	7840769
chr1	7846915
chr1	7846949
chr1	7859081
chr1	7859606
chr1	7860199
chr1	7861476
chr1	7861792
chr1	7864630
chr1	7864993
chr1	7865013
chr1	7865600
chr1	7865637
chr1	7865706
chr1	7865757
chr1	7865763
chr1	7865785
chr1	7865817
chr1	7865841
chr1	7865880
chr1	7865904
chr1	7865965
chr1	7866011
chr1	7869069
chr1	7879030
chr1	7879298
chr1	7880891
chr1	7881657
chr1	7882379
chr1	7883112
chr1	7883269
chr1	7883588
chr1	7883597
chr1	7890418
chr1	7891878
chr1	7893012
chr1	7893261
chr1	7893725
chr1	7893731
chr1	7894307
chr1	7894318
chr1	7894454
chr1	7894457
chr1	7894460
chr1	7894960
chr1	7895008
chr1	7895136
chr1	7895155
chr1	7895185
chr1	7895201
chr1	7895311
chr1	7895314
chr1	7895320
chr1	7895353
chr1	7895365
chr1	7895419
chr1	7895715
chr1	7895971
chr1	7895992
chr1	7896516
chr1	7896914
chr1	7897027
chr1	7897351
chr1	7897413
chr1	7897468
chr1	7897502
chr1	7898095
chr1	7898099
chr1	7898176
chr1	7898177
chr1	7898180
chr1	7898226
chr1	7898268
chr1	7898428
chr1	7898473
chr1	7898481
chr1	7898500
chr1	7898530
chr1	7898583
chr1	7898593
chr1	7898626
chr1	7898637
chr1	7898698
chr1	7898761
chr1	7898908
chr1	7898917
chr1	7898985
chr1	7898990
chr1	7899012
chr1	7899463
chr1	7899466
chr1	7899520
chr1	7899535
chr1	7899537
chr1	7899554
chr1	7899673
chr1	7899696
chr1	7899891
chr1	7899958
chr1	7900535
chr1	7900618
chr1	7900642
chr1	7900696
chr1	7900703
chr1	7900732
chr1	7901005
chr1	7901089
chr1	7901098
chr1	7901113
chr1	7901123
chr1	7901371
chr1	7901436
chr1	7901468
chr1	7901898
chr1	7902134
chr1	7902224
chr1	7903907
chr1	7904073
chr1	7904088
chr1	7904412
chr1	7904460
chr1	7904586
chr1	7904799
chr1	7906505
chr1	7908771
chr1	7908773
chr1	7908998
chr1	7909107
chr1	7909210
chr1	7909257
chr1	7909409
chr1	7909475
chr1	7909509
chr1	7912076
chr1	7912539
chr1	7919905
chr1	7920340
chr1	7920623
chr1	7921004
chr1	7921619
chr1	7921726
chr1	7949474
chr1	7952573
chr1	7953255
chr1	7953270
chr1	7953384
chr1	7953827
chr1	7953969
chr1	7953991
chr1	7954310
chr1	7955610
chr1	7955884
chr1	7955944
chr1	7955986
chr1	7956099
chr1	7956515
chr1	7956881
chr1	7957527
chr1	7957793
chr1	7957804
chr1	7957805
chr1	7957807
chr1	7964575
chr1	7964626
chr1	7964810
chr1	7964924
chr1	7965077
chr1	7965319
chr1	7965440
chr1	7965523
chr1	7965541
chr1	7965583
chr1	7965607
chr1	7965608
chr1	7965625
chr1	7965655
chr1	7966376
chr1	7967877
chr1	7975672
chr1	7976776
chr1	7976812
chr1	7976832
chr1	7977159
chr1	7977274
chr1	7977454
chr1	7977550
chr1	7977598
chr1	7978291
chr1	7983893
chr1	7986903
chr1	7987893
chr1	7987894
chr1	7988518
chr1	7997201
chr1	7997785
chr1	8002746
chr1	8007165
chr1	8017495
chr1	8018529
chr1	8020141
chr1	8021561
chr1	8021682
chr1	8029855
chr1	8029933
chr1	8032469
chr1	8032749
chr1	8046639
chr1	8046696
chr1	8046718
chr1	8046881
chr1	8047125
chr1	8047822
chr1	8048078
chr1	8048247
chr1	8048568
chr1	8049428
chr1	8049534
chr1	8049536
chr1	8050294
chr1	8050362
chr1	8050662
chr1	8050668
chr1	8050974
chr1	8050976
chr1	8050997
chr1	8051572
chr1	8051745
chr1	8051767
chr1	8052071
chr1	8052678
chr1	8052705
chr1	8052738
chr1	8052778
chr1	8052779
chr1	8052831
chr1	8061835
chr1	8062264
chr1	8062332
chr1	8062334
chr1	8062368
chr1	8065241
chr1	8065458
chr1	8065940
chr1	8067478
chr1	8067582
chr1	8067715
chr1	8067891
chr1	8068147
chr1	8069294
chr1	8069554
chr1	8069658
chr1	8069671
chr1	8070048
chr1	8071096
chr1	8072059
chr1	8072712
chr1	8073105
chr1	8073112
chr1	8073114
chr1	8073324
chr1	8073794
chr1	8073896
chr1	8073994
chr1	8074119
chr1	8074524
chr1	8074628
chr1	8074826
chr1	8076201
chr1	8076887
chr1	8078444
chr1	8079811
chr1	8081058
chr1	8081072
chr1	8081416
chr1	8081723
chr1	8081729
chr1	8081741
chr1	8081863
chr1	8082231
chr1	8082233
chr1	8082460
chr1	8083911
chr1	8085371
chr1	8085380
chr1	8086667
chr1	8086684
chr1	8086760
chr1	8086835
chr1	8087088
chr1	8089098
chr1	8090193
chr1	8090393
chr1	8092146
chr1	8092531
chr1	8092878
chr1	8093068
chr1	8093177
chr1	8093278
chr1	8093640
chr1	8094356
chr1	8096108
chr1	8096126
chr1	8096163
chr1	8096948
chr1	8097219
chr1	8099251
chr1	8099395
chr1	8099414
chr1	8100524
chr1	8100898
chr1	8101009
chr1	8102103
chr1	8103454
chr1	8103457
chr1	8103985
chr1	8104108
chr1	8104159
chr1	8104212
chr1	8104249
chr1	8110680
chr1	8110716
chr1	8110749
chr1	8110903
chr1	8110905
chr1	8110972
chr1	8111238
chr1	8118652
chr1	8119265
chr1	8119610
chr1	8119850
chr1	8120115
chr1	8120783
chr1	8121774
chr1	8123377
chr1	8123990
chr1	8124446
chr1	8124898
chr1	8129192
chr1	8129226
chr1	8129708
chr1	8132105
chr1	8132205
chr1	8132521
chr1	8133104
chr1	8133231
chr1	8133790
chr1	8135365
chr1	8135511
chr1	8135616
chr1	8135887
chr1	8144187
chr1	8149136
chr1	8150194
chr1	8150643
chr1	8150648
chr1	8150748
chr1	8150760
chr1	8151009
chr1	8151011
chr1	8151163
chr1	8151256
chr1	8151328
chr1	8151382
chr1	8151394
chr1	8151466
chr1	8151517
chr1	8151639
chr1	8152064
chr1	8152088
chr1	8152094
chr1	8152217
chr1	8152259
chr1	8152268
chr1	8153210
chr1	8153211
chr1	8158731
chr1	8168729
chr1	8168777
chr1	8168910
chr1	8168954
chr1	8169118
chr1	8169120
chr1	8172029
chr1	8172095
chr1	8174167
chr1	8174945
chr1	8175021
chr1	8175117
chr1	8175250
chr1	8175253
chr1	8175380
chr1	8175421
chr1	8175446
chr1	8175528
chr1	8180462
chr1	8180465
chr1	8180527
chr1	8180534
chr1	8180536
chr1	8180703
chr1	8180721
chr1	8180725
chr1	8180786
chr1	8180801
chr1	8181914
chr1	8181965
chr1	8182112
chr1	8182219
chr1	8182318
chr1	8182321
chr1	8182549
chr1	8182573
chr1	8182678
chr1	8182720
chr1	8182813
chr1	8183326
chr1	8185223
chr1	8185300
chr1	8186171
chr1	8186450
chr1	8186921
chr1	8187410
chr1	8187414
chr1	8187674
chr1	8188103
chr1	8188677
chr1	8188871
chr1	8196167
chr1	8198940
chr1	8199122
chr1	8199225
chr1	8199408
chr1	8216184
chr1	8216683
chr1	8216970
chr1	8218325
chr1	8218786
chr1	8218948
chr1	8219388
chr1	8219553
chr1	8221925
chr1	8222902
chr1	8224174
chr1	8242508
chr1	8242553
chr1	8243318
chr1	8248812
chr1	8251194
chr1	8251196
chr1	8251273
chr1	8251385
chr1	8251749
chr1	8251806
chr1	8260698
chr1	8260768
chr1	8261253
chr1	8269107
chr1	8269299
chr1	8270225
chr1	8280571
chr1	8296334
chr1	8296501
chr1	8296617
chr1	8296807
chr1	8297489
chr1	8297544
chr1	8297613
chr1	8297786
chr1	8297810
chr1	8298108
chr1	8298417
chr1	8299152
chr1	8299300
chr1	8300079
chr1	8301673
chr1	8309221
chr1	8309560
chr1	8310061
chr1	8310182
chr1	8310349
chr1	8312322
chr1	8312346
chr1	8312382
chr1	8312830
chr1	8315425
chr1	8321934
chr1	8322528
chr1	8322538
chr1	8322571
chr1	8322803
chr1	8322871
chr1	8322990
chr1	8323007
chr1	8323269
chr1	8323552
chr1	8323791
chr1	8323830
chr1	8323875
chr1	8323980
chr1	8323986
chr1	8323989
chr1	8324033
chr1	8324061
chr1	8324075
chr1	8326138
chr1	8326355
chr1	8326790
chr1	8327475
chr1	8327508
chr1	8328119
chr1	8328122
chr1	8329002
chr1	8329469
chr1	8330375
chr1	8330865
chr1	8330926
chr1	8331131
chr1	8331194
chr1	8331810
chr1	8331923
chr1	8338580
chr1	8338738
chr1	8351650
chr1	8352100
chr1	8352246
chr1	8352624
chr1	8352661
chr1	8352697
chr1	8352804
chr1	8385787
chr1	8385842
chr1	8386318
chr1	8398700
chr1	8398706
chr1	8398707
chr1	8398718
chr1	8398727
chr1	8398887
chr1	8398899
chr1	8398968
chr1	8399037
chr1	8399040
chr1	8399100
chr1	8399133
chr1	8399279
chr1	8399310
chr1	8399332
chr1	8399361
chr1	8399378
chr1	8399383
chr1	8399455
chr1	8399593
chr1	8400764
chr1	8401021
chr1	8405180
chr1	8405662
chr1	8405666
chr1	8405775
chr1	8407230
chr1	8407349
chr1	8407392
chr1	8407491
chr1	8407503
chr1	8407508
chr1	8407536
chr1	8407578
chr1	8407593
chr1	8407641
chr1	8407648
chr1	8407677
chr1	8407680
chr1	8407725
chr1	8407746
chr1	8407764
chr1	8407779
chr1	8407781
chr1	8407818
chr1	8407839
chr1	8407842
chr1	8407848
chr1	8407878
chr1	8407982
chr1	8408028
chr1	8408210
chr1	8408259
chr1	8408358
chr1	8408372
chr1	8408421
chr1	8420353
chr1	8420448
chr1	8421321
chr1	8421552
chr1	8422100
chr1	8422648
chr1	8424498
chr1	8424894
chr1	8427418
chr1	8429282
chr1	8432636
chr1	8432775
chr1	8432946
chr1	8433057
chr1	8433549
chr1	8434955
chr1	8435526
chr1	8436354
chr1	8436367
chr1	8437248
chr1	8438325
chr1	8438395
chr1	8438448
chr1	8438521
chr1	8438698
chr1	8438903
chr1	8438928
chr1	8438958
chr1	8438976
chr1	8439017
chr1	8439071
chr1	8439086
chr1	8439101
chr1	8439133
chr1	8439149
chr1	8439160
chr1	8439286
chr1	8439287
chr1	8439351
chr1	8439591
chr1	8439621
chr1	8439683
chr1	8439845
chr1	8440102
chr1	8440144
chr1	8440415
chr1	8440612
chr1	8440630
chr1	8441293
chr1	8441308
chr1	8441897
chr1	8441909
chr1	8442005
chr1	8442620
chr1	8443381
chr1	8444814
chr1	8445588
chr1	8445929
chr1	8446242
chr1	8446661
chr1	8458375
chr1	8458438
chr1	8466044
chr1	8467887
chr1	8467980
chr1	8479002
chr1	8479079
chr1	8480114
chr1	8480456
chr1	8482716
chr1	8484927
chr1	8484936
chr1	8504868
chr1	8505030
chr1	8505598
chr1	8505872
chr1	8507072
chr1	8508328
chr1	8508505
chr1	8508707
chr1	8522785
chr1	8523543
chr1	8523570
chr1	8526228
chr1	8526241
chr1	8526558
chr1	8526753
chr1	8526834
chr1	8529463
chr1	8529748
chr1	8529918
chr1	8530077
chr1	8530098
chr1	8530116
chr1	8530660
chr1	8530878
chr1	8530911
chr1	8531390
chr1	8531827
chr1	8531830
chr1	8531966
chr1	8531973
chr1	8532032
chr1	8536383
chr1	8536560
chr1	8537166
chr1	8537189
chr1	8549845
chr1	8551205
chr1	8554770
chr1	8555153
chr1	8557449
chr1	8557672
chr1	8557682
chr1	8557697
chr1	8557715
chr1	8557973
chr1	8558252
chr1	8558333
chr1	8558522
chr1	8558532
chr1	8558535
chr1	8558612
chr1	8559149
chr1	8561575
chr1	8561599
chr1	8561652
chr1	8563379
chr1	8563867
chr1	8565489
chr1	8565788
chr1	8566703
chr1	8567253
chr1	8568794
chr1	8568928
chr1	8574006
chr1	8574279
chr1	8586603
chr1	8586632
chr1	8587497
chr1	8587885
chr1	8587943
chr1	8588010
chr1	8588044
chr1	8588053
chr1	8601025
chr1	8603244
chr1	8603652
chr1	8603724
chr1	8604446
chr1	8604526
chr1	8610211
chr1	8610217
chr1	8612540
chr1	8612631
chr1	8613296
chr1	8613638
chr1	8613712
chr1	8614256
chr1	8614710
chr1	8614803
chr1	8617048
chr1	8617096
chr1	8617470
chr1	8617595
chr1	8620403
chr1	8625584
chr1	8636469
chr1	8637464
chr1	8641480
chr1	8641518
chr1	8642186
chr1	8642449
chr1	8642748
chr1	8662123
chr1	8662700
chr1	8662819
chr1	8664446
chr1	8665096
chr1	8665184
chr1	8666018
chr1	8666083
chr1	8666159
chr1	8666522
chr1	8667153
chr1	8668057
chr1	8668087
chr1	8668132
chr1	8669000
chr1	8669366
chr1	8670244
chr1	8670286
chr1	8671261
chr1	8671524
chr1	8672141
chr1	8672206
chr1	8672207
chr1	8682274
chr1	8682298
chr1	8682373
chr1	8682432
chr1	8682526
chr1	8682558
chr1	8682615
chr1	8682820
chr1	8682823
chr1	8683288
chr1	8683364
chr1	8683952
chr1	8683961
chr1	8683976
chr1	8684190
chr1	8684449
chr1	8684468
chr1	8684564
chr1	8684675
chr1	8684722
chr1	8684754
chr1	8684757
chr1	8684776
chr1	8684878
chr1	8684900
chr1	8684912
chr1	8684928
chr1	8684987
chr1	8685040
chr1	8685238
chr1	8685468
chr1	8685502
chr1	8685576
chr1	8685579
chr1	8685609
chr1	8685612
chr1	8685672
chr1	8685673
chr1	8685980
chr1	8686052
chr1	8686381
chr1	8686701
chr1	8686761
chr1	8686931
chr1	8686982
chr1	8686991
chr1	8687030
chr1	8687099
chr1	8687475
chr1	8687670
chr1	8687673
chr1	8693334
chr1	8693418
chr1	8693562
chr1	8693742
chr1	8693748
chr1	8693781
chr1	8693808
chr1	8693897
chr1	8693934
chr1	8694033
chr1	8694117
chr1	8694216
chr1	8694219
chr1	8694249
chr1	8694306
chr1	8694336
chr1	8694357
chr1	8694393
chr1	8694441
chr1	8694444
chr1	8694459
chr1	8694551
chr1	8694552
chr1	8694569
chr1	8694594
chr1	8694602
chr1	8703142
chr1	8704003
chr1	8704308
chr1	8704581
chr1	8705167
chr1	8705575
chr1	8710089
chr1	8710837
chr1	8711520
chr1	8720734
chr1	8745971
chr1	8748690
chr1	8748881
chr1	8749125
chr1	8749161
chr1	8749325
chr1	8750099
chr1	8750592
chr1	8752808
chr1	8755305
chr1	8756313
chr1	8758080
chr1	8759697
chr1	8759843
chr1	8759962
chr1	8760157
chr1	8760848
chr1	8763161
chr1	8838767
chr1	8838783
chr1	8839131
chr1	8839272
chr1	8844075
chr1	8844136
chr1	8844184
chr1	8854073
chr1	8854473
chr1	8854649
chr1	8860773
chr1	8860780
chr1	8863993
chr1	8864629
chr1	8864772
chr1	8864944
chr1	8865772
chr1	8867492
chr1	8867493
chr1	8874332
chr1	8877995
chr1	8879952
chr1	8880924
chr1	8889119
chr1	8890397
chr1	8890843
chr1	8892760
chr1	8896315
chr1	8898659
chr1	8898733
chr1	8898857
chr1	8898965
chr1	8900621
chr1	8900632
chr1	8900716
chr1	8900756
chr1	8901193
chr1	8901431
chr1	8901449
chr1	8901577
chr1	8901679
chr1	8901739
chr1	8902219
chr1	8902223
chr1	8902280
chr1	8902291
chr1	8902510
chr1	8902515
chr1	8902544
chr1	8902582
chr1	8902884
chr1	8903017
chr1	8903189
chr1	8903566
chr1	8903648
chr1	8903708
chr1	8903782
chr1	8903900
chr1	8903906
chr1	8904293
chr1	8904459
chr1	8904557
chr1	8904558
chr1	8904576
chr1	8904642
chr1	8904745
chr1	8904819
chr1	8904890
chr1	8904937
chr1	8905035
chr1	8905485
chr1	8905638
chr1	8905788
chr1	8905807
chr1	8905831
chr1	8905836
chr1	8905864
chr1	8905879
chr1	8905896
chr1	8905906
chr1	8905985
chr1	8906739
chr1	8906844
chr1	8906943
chr1	8907003
chr1	8908742
chr1	8908754
chr1	8908805
chr1	8908886
chr1	8908948
chr1	8912377
chr1	8914602
chr1	8914808
chr1	8914823
chr1	8915148
chr1	8916173
chr1	8916312
chr1	8917797
chr1	8917799
chr1	8919721
chr1	8919739
chr1	8919881
chr1	8938844
chr1	8938976
chr1	8939231
chr1	8940149
chr1	8943772
chr1	8944738
chr1	8945312
chr1	8945345
chr1	8945375
chr1	8945377
chr1	8949291
chr1	8950687
chr1	8953893
chr1	8954314
chr1	8954543
chr1	8955353
chr1	8957627
chr1	8957860
chr1	8959661
chr1	8959828
chr1	8964076
chr1	8964203
chr1	8971945
chr1	8972412
chr1	8972496
chr1	8972742
chr1	8972755
chr1	8972918
chr1	8976620
chr1	8976655
chr1	8977104
chr1	8977107
chr1	8977128
chr1	8977383
chr1	8982072
chr1	8992136
chr1	8992204
chr1	8993125
chr1	8993496
chr1	8994645
chr1	8997483
chr1	9002638
chr1	9003717
chr1	9024562
chr1	9025175
chr1	9025743
chr1	9026643
chr1	9027016
chr1	9029467
chr1	9029608
chr1	9031418
chr1	9033320
chr1	9033481
chr1	9033809
chr1	9034057
chr1	9034602
chr1	9034883
chr1	9035712
chr1	9038514
chr1	9039785
chr1	9039821
chr1	9040861
chr1	9041894
chr1	9042362
chr1	9042418
chr1	9042525
chr1	9042536
chr1	9042604
chr1	9042672
chr1	9042806
chr1	9042922
chr1	9043106
chr1	9045158
chr1	9045558
chr1	9045662
chr1	9046040
chr1	9046907
chr1	9048595
chr1	9048597
chr1	9049896
chr1	9050494
chr1	9051506
chr1	9052218
chr1	9053305
chr1	9054523
chr1	9054708
chr1	9055268
chr1	9055918
chr1	9056603
chr1	9056760
chr1	9056946
chr1	9057827
chr1	9059353
chr1	9059472
chr1	9059840
chr1	9060924
chr1	9060956
chr1	9066715
chr1	9067586
chr1	9067630
chr1	9069015
chr1	9069155
chr1	9070844
chr1	9070903
chr1	9071761
chr1	9071979
chr1	9075871
chr1	9076601
chr1	9079171
chr1	9087016
chr1	9087044
chr1	9087158
chr1	9087327
chr1	9087350
chr1	9087354
chr1	9087410
chr1	9087432
chr1	9089215
chr1	9090281
chr1	9091178
chr1	9091836
chr1	9091856
chr1	9092307
chr1	9092321
chr1	9096309
chr1	9096738
chr1	9097697
chr1	9097815
chr1	9098071
chr1	9098133
chr1	9098586
chr1	9099003
chr1	9099212
chr1	9099403
chr1	9099693
chr1	9109554
chr1	9110961
chr1	9113982
chr1	9125497
chr1	9134757
chr1	9134759
chr1	9138888
chr1	9139463
chr1	9142006
chr1	9142063
chr1	9145121
chr1	9145421
chr1	9145452
chr1	9145698
chr1	9145870
chr1	9145875
chr1	9152328
chr1	9153071
chr1	9153345
chr1	9165481
chr1	9166614
chr1	9166804
chr1	9167017
chr1	9167114
chr1	9175861
chr1	9176291
chr1	9197671
chr1	9198263
chr1	9198312
chr1	9199443
chr1	9206148
chr1	9206175
chr1	9206197
chr1	9206781
chr1	9206886
chr1	9207365
chr1	9208647
chr1	9208798
chr1	9209052
chr1	9209074
chr1	9209275
chr1	9209383
chr1	9209494
chr1	9209811
chr1	9210728
chr1	9210771
chr1	9212779
chr1	9213201
chr1	9214196
chr1	9215214
chr1	9215218
chr1	9215274
chr1	9215292
chr1	9215343
chr1	9215521
chr1	9216632
chr1	9217850
chr1	9217853
chr1	9224162
chr1	9224248
chr1	9224521
chr1	9224538
chr1	9224959
chr1	9224979
chr1	9225741
chr1	9225749
chr1	9246343
chr1	9246484
chr1	9247207
chr1	9247429
chr1	9247443
chr1	9247816
chr1	9253745
chr1	9253881
chr1	9254129
chr1	9260450
chr1	9260806
chr1	9261073
chr1	9285098
chr1	9285141
chr1	9285165
chr1	9285231
chr1	9285245
chr1	9285291
chr1	9285293
chr1	9285618
chr1	9285625
chr1	9287473
chr1	9288569
chr1	9288600
chr1	9288710
chr1	9288995
chr1	9289400
chr1	9289818
chr1	9298254
chr1	9300579
chr1	9300986
chr1	9302875
chr1	9315973
chr1	9316007
chr1	9316594
chr1	9319044
chr1	9319674
chr1	9319827
chr1	9319841
chr1	9319882
chr1	9321743
chr1	9321915
chr1	9322301
chr1	9329688
chr1	9329772
chr1	9329849
chr1	9330135
chr1	9343952
chr1	9345067
chr1	9374100
chr1	9374109
chr1	9374121
chr1	9374410
chr1	9374467
chr1	9374496
chr1	9374983
chr1	9375289
chr1	9375547
chr1	9375801
chr1	9376063
chr1	9376137
chr1	9376160
chr1	9376183
chr1	9376186
chr1	9376210
chr1	9376229
chr1	9376236
chr1	9376496
chr1	9376669
chr1	9376670
chr1	9393832
chr1	9393940
chr1	9398466
chr1	9398655
chr1	9398782
chr1	9398999
chr1	9399019
chr1	9399241
chr1	9399324
chr1	9399326
chr1	9403860
chr1	9404707
chr1	9405110
chr1	9405463
chr1	9405751
chr1	9405862
chr1	9405922
chr1	9405985
chr1	9406127
chr1	9407499
chr1	9407540
chr1	9407662
chr1	9407677
chr1	9407701
chr1	9407725
chr1	9407767
chr1	9408241
chr1	9408252
chr1	9408271
chr1	9408319
chr1	9408535
chr1	9421426
chr1	9421994
chr1	9422561
chr1	9423879
chr1	9423880
chr1	9426537
chr1	9429158
chr1	9429663
chr1	9429664
chr1	9429687
chr1	9429727
chr1	9430738
chr1	9431871
chr1	9431938
chr1	9432124
chr1	9432146
chr1	9434525
chr1	9434551
chr1	9434622
chr1	9439165
chr1	9439168
chr1	9439210
chr1	9439227
chr1	9439236
chr1	9443161
chr1	9443822
chr1	9444007
chr1	9444135
chr1	9446802
chr1	9447409
chr1	9448014
chr1	9448778
chr1	9449765
chr1	9481842
chr1	9481933
chr1	9482321
chr1	9482346
chr1	9482351
chr1	9482355
chr1	9482523
chr1	9482730
chr1	9482791
chr1	9482896
chr1	9483561
chr1	9483715
chr1	9484228
chr1	9484234
chr1	9484276
chr1	9484385
chr1	9484468
chr1	9484504
chr1	9484525
chr1	9484601
chr1	9484608
chr1	9484609
chr1	9485112
chr1	9485500
chr1	9485707
chr1	9485719
chr1	9485776
chr1	9487344
chr1	9487348
chr1	9487432
chr1	9487892
chr1	9487897
chr1	9488250
chr1	9488253
chr1	9489715
chr1	9495896
chr1	9495897
chr1	9495938
chr1	9496260
chr1	9496318
chr1	9496687
chr1	9498023
chr1	9498034
chr1	9501125
chr1	9502537
chr1	9507310
chr1	9512315
chr1	9512423
chr1	9512575
chr1	9512716
chr1	9512725
chr1	9513363
chr1	9513423
chr1	9513484
chr1	9513594
chr1	9513613
chr1	9513811
chr1	9514037
chr1	9514039
chr1	9514456
chr1	9514776
chr1	9515949
chr1	9516408
chr1	9516849
chr1	9517294
chr1	9517383
chr1	9517787
chr1	9518431
chr1	9518576
chr1	9518706
chr1	9519806
chr1	9520084
chr1	9522729
chr1	9524004
chr1	9524860
chr1	9527631
chr1	9527792
chr1	9528573
chr1	9529154
chr1	9532734
chr1	9535760
chr1	9536200
chr1	9540115
chr1	9540621
chr1	9541324
chr1	9551698
chr1	9554070
chr1	9554769
chr1	9554810
chr1	9554818
chr1	9554927
chr1	9555143
chr1	9555224
chr1	9555543
chr1	9555716
chr1	9555976
chr1	9556544
chr1	9556717
chr1	9556759
chr1	9557060
chr1	9557316
chr1	9557352
chr1	9557458
chr1	9558046
chr1	9558053
chr1	9558060
chr1	9558123
chr1	9558127
chr1	9558806
chr1	9558844
chr1	9560203
chr1	9560882
chr1	9560897
chr1	9560995
chr1	9561522
chr1	9563216
chr1	9563440
chr1	9563618
chr1	9566231
chr1	9566280
chr1	9566471
chr1	9566597
chr1	9570345
chr1	9570425
chr1	9570892
chr1	9572664
chr1	9572704
chr1	9572783
chr1	9573233
chr1	9576468
chr1	9576661
chr1	9576773
chr1	9585949
chr1	9594060
chr1	9595698
chr1	9597219
chr1	9597446
chr1	9597874
chr1	9599554
chr1	9601620
chr1	9601988
chr1	9603018
chr1	9604404
chr1	9604852
chr1	9605474
chr1	9606060
chr1	9611515
chr1	9612680
chr1	9614765
chr1	9614820
chr1	9614960
chr1	9615035
chr1	9615253
chr1	9615355
chr1	9615373
chr1	9615376
chr1	9615439
chr1	9615442
chr1	9615484
chr1	9615604
chr1	9615610
chr1	9631405
chr1	9631408
chr1	9632311
chr1	9632376
chr1	9632688
chr1	9632694
chr1	9634127
chr1	9634141
chr1	9634399
chr1	9634412
chr1	9634487
chr1	9639286
chr1	9639447
chr1	9639626
chr1	9639970
chr1	9639971
chr1	9640429
chr1	9657537
chr1	9657656
chr1	9658299
chr1	9659369
chr1	9659543
chr1	9662721
chr1	9662748
chr1	9663421
chr1	9667062
chr1	9668630
chr1	9670385
chr1	9693191
chr1	9693614
chr1	9694536
chr1	9695076
chr1	9696309
chr1	9696311
chr1	9701485
chr1	9701901
chr1	9702056
chr1	9703055
chr1	9705471
chr1	9709159
chr1	9709160
chr1	9709645
chr1	9710391
chr1	9712346
chr1	9712375
chr1	9712427
chr1	9713949
chr1	9713972
chr1	9715456
chr1	9716496
chr1	9716662
chr1	9717074
chr1	9717265
chr1	9717569
chr1	9719051
chr1	9721095
chr1	9721782
chr1	9724605
chr1	9725598
chr1	9726774
chr1	9726784
chr1	9727131
chr1	9727567
chr1	9728401
chr1	9728803
chr1	9728855
chr1	9728908
chr1	9729202
chr1	9729506
chr1	9729539
chr1	9730018
chr1	9731420
chr1	9731879
chr1	9740903
chr1	9741766
chr1	9741914
chr1	9743685
chr1	9744101
chr1	9747175
chr1	9747432
chr1	9747470
chr1	9747887
chr1	9748774
chr1	9748871
chr1	9749016
chr1	9749137
chr1	9749515
chr1	9749587
chr1	9750289
chr1	9750386
chr1	9752816
chr1	9753494
chr1	9753931
chr1	9776148
chr1	9776167
chr1	9777102
chr1	9777176
chr1	9777870
chr1	9779997
chr1	9780742
chr1	9780816
chr1	9781240
chr1	9781500
chr1	9781544
chr1	9781637
chr1	9782305
chr1	9783301
chr1	9783798
chr1	9783824
chr1	9783831
chr1	9795861
chr1	9795864
chr1	9796263
chr1	9796319
chr1	9796370
chr1	9797413
chr1	9797820
chr1	9798191
chr1	9798696
chr1	9798933
chr1	9798992
chr1	9801258
chr1	9804077
chr1	9813073
chr1	9813186
chr1	9813895
chr1	9814548
chr1	9815130
chr1	9831519
chr1	9832897
chr1	9833359
chr1	9833401
chr1	9834339
chr1	9834987
chr1	9835080
chr1	9835192
chr1	9835417
chr1	9835690
chr1	9835813
chr1	9835819
chr1	9847451
chr1	9850787
chr1	9851112
chr1	9851969
chr1	9852100
chr1	9855077
chr1	9856014
chr1	9858809
chr1	9859207
chr1	9859556
chr1	9859591
chr1	9862221
chr1	9862533
chr1	9868423
chr1	9868463
chr1	9871092
chr1	9871810
chr1	9872095
chr1	9874837
chr1	9875506
chr1	9875730
chr1	9875754
chr1	9876819
chr1	9877113
chr1	9878522
chr1	9878552
chr1	9878645
chr1	9886645
chr1	9886904
chr1	9887054
chr1	9887400
chr1	9887401
chr1	9889483
chr1	9889896
chr1	9909534
chr1	9909538
chr1	9911188
chr1	9911227
chr1	9920552
chr1	9920589
chr1	9921481
chr1	9922210
chr1	9922216
chr1	9922237
chr1	9922464
chr1	9925753
chr1	9935049
chr1	9935071
chr1	9942557
chr1	9944871
chr1	9945196
chr1	9946991
chr1	9949191
chr1	9949390
chr1	9949685
chr1	9949689
chr1	9951854
chr1	9951999
chr1	9952357
chr1	9952896
chr1	9956890
chr1	9964333
chr1	9964365
chr1	9964489
chr1	9964634
chr1	9965502
chr1	9966740
chr1	9967224
chr1	9970069
chr1	9970930
chr1	9971066
chr1	9972762
chr1	9973305
chr1	9973619
chr1	9976327
chr1	9976527
chr1	9977175
chr1	9980433
chr1	9980561
chr1	9980808
chr1	9980935
chr1	9981308
chr1	9981492
chr1	9982046
chr1	9982375
chr1	9983498
chr1	9983846
chr1	9984544
chr1	9985181
chr1	9985317
chr1	9985685
chr1	9985877
chr1	9986552
chr1	9996961
chr1	9997903
chr1	9997933
chr1	9998228
chr1	9998344
chr1	9998374
chr1	9998382
chr1	9998524
chr1	9998526
chr1	9998626
chr1	9998639
chr1	9998647
chr1	9998782
chr1	9998785
chr1	9999109
chr1	9999163
chr1	9999226
chr1	9999241
chr1	9999430
chr1	9999457
chr1	9999560
chr1	9999760
chr1	9999892
chr1	9999988
chr1	10000153
chr1	10000226
chr1	10013542
chr1	10016004
chr1	10017718
chr1	10025514
chr1	10029565
chr1	10030093
chr1	10031122
chr1	10031505
chr1	10032598
chr1	10033245
chr1	10033318
chr1	10033450
chr1	10033515
chr1	10034492
chr1	10036124
chr1	10036211
chr1	10036652
chr1	10036654
chr1	10038796
chr1	10038876
chr1	10039833
chr1	10040782
chr1	10045695
chr1	10052318
chr1	10052629
chr1	10053223
chr1	10053836
chr1	10055729
chr1	10056693
chr1	10056760
chr1	10056800
chr1	10057621
chr1	10057665
chr1	10067460
chr1	10067465
chr1	10067606
chr1	10067640
chr1	10067680
chr1	10067813
chr1	10067814
chr1	10067864
chr1	10067881
chr1	10067918
chr1	10067963
chr1	10068025
chr1	10068086
chr1	10068119
chr1	10068353
chr1	10068365
chr1	10068593
chr1	10068727
chr1	10068849
chr1	10069056
chr1	10069057
chr1	10069083
chr1	10069094
chr1	10069874
chr1	10070295
chr1	10070547
chr1	10070686
chr1	10070699
chr1	10070908
chr1	10071061
chr1	10072912
chr1	10075261
chr1	10075495
chr1	10075497
chr1	10078238
chr1	10078779
chr1	10078960
chr1	10079143
chr1	10079225
chr1	10079264
chr1	10079326
chr1	10079463
chr1	10079477
chr1	10079565
chr1	10079635
chr1	10079641
chr1	10079924
chr1	10080159
chr1	10080191
chr1	10080314
chr1	10080357
chr1	10080687
chr1	10080777
chr1	10080903
chr1	10080939
chr1	10081563
chr1	10086835
chr1	10086873
chr1	10088014
chr1	10088047
chr1	10090195
chr1	10090261
chr1	10091198
chr1	10091418
chr1	10092577
chr1	10092707
chr1	10093117
chr1	10093138
chr1	10095016
chr1	10096091
chr1	10096303
chr1	10096363
chr1	10096837
chr1	10097242
chr1	10097659
chr1	10097769
chr1	10099001
chr1	10100192
chr1	10100685
chr1	10101892
chr1	10101910
chr1	10102387
chr1	10103295
chr1	10104729
chr1	10104768
chr1	10105686
chr1	10107748
chr1	10108140
chr1	10108369
chr1	10108773
chr1	10109554
chr1	10109845
chr1	10110183
chr1	10110686
chr1	10111215
chr1	10111230
chr1	10111581
chr1	10129434
chr1	10129582
chr1	10129714
chr1	10129931
chr1	10130486
chr1	10131070
chr1	10131932
chr1	10135606
chr1	10147883
chr1	10148186
chr1	10148336
chr1	10149072
chr1	10149074
chr1	10149324
chr1	10149332
chr1	10149357
chr1	10149375
chr1	10149504
chr1	10149946
chr1	10149951
chr1	10149994
chr1	10149999
chr1	10150039
chr1	10150043
chr1	10150969
chr1	10151026
chr1	10151089
chr1	10151122
chr1	10174777
chr1	10176162
chr1	10180845
chr1	10181675
chr1	10190292
chr1	10191859
chr1	10191992
chr1	10192595
chr1	10199656
chr1	10199690
chr1	10199908
chr1	10200212
chr1	10202517
chr1	10202562
chr1	10202631
chr1	10202769
chr1	10202774
chr1	10202792
chr1	10202799
chr1	10202914
chr1	10203047
chr1	10210662
chr1	10211457
chr1	10212152
chr1	10212255
chr1	10212476
chr1	10216668
chr1	10217172
chr1	10219394
chr1	10219696
chr1	10224616
chr1	10245249
chr1	10245297
chr1	10248756
chr1	10254567
chr1	10255849
chr1	10256965
chr1	10258362
chr1	10258570
chr1	10259142
chr1	10259732
chr1	10261172
chr1	10265784
chr1	10265798
chr1	10266136
chr1	10268438
chr1	10275459
chr1	10275463
chr1	10275464
chr1	10275477
chr1	10275481
chr1	10275647
chr1	10286787
chr1	10286836
chr1	10290872
chr1	10290954
chr1	10291748
chr1	10292209
chr1	10294149
chr1	10300406
chr1	10300480
chr1	10301065
chr1	10301235
chr1	10308854
chr1	10312884
chr1	10326692
chr1	10331637
chr1	10340661
chr1	10350712
chr1	10350958
chr1	10351539
chr1	10352428
chr1	10353542
chr1	10355893
chr1	10377739
chr1	10378887
chr1	10381885
chr1	10385067
chr1	10386772
chr1	10387939
chr1	10388138
chr1	10388882
chr1	10422575
chr1	10422812
chr1	10424773
chr1	10424893
chr1	10425438
chr1	10426874
chr1	10428600
chr1	10428637
chr1	10428654
chr1	10428655
chr1	10428835
chr1	10428937
chr1	10429001
chr1	10430258
chr1	10430259
chr1	10430372
chr1	10430456
chr1	10430529
chr1	10430531
chr1	10430652
chr1	10430654
chr1	10430747
chr1	10430750
chr1	10430816
chr1	10431101
chr1	10431163
chr1	10433128
chr1	10433240
chr1	10433304
chr1	10433499
chr1	10433971
chr1	10434193
chr1	10434274
chr1	10434319
chr1	10434567
chr1	10434576
chr1	10434992
chr1	10435431
chr1	10435490
chr1	10435523
chr1	10435524
chr1	10435581
chr1	10435588
chr1	10436041
chr1	10436050
chr1	10436077
chr1	10436098
chr1	10436121
chr1	10438241
chr1	10438272
chr1	10438278
chr1	10438308
chr1	10438389
chr1	10438432
chr1	10438536
chr1	10438599
chr1	10438620
chr1	10438623
chr1	10439395
chr1	10439527
chr1	10439548
chr1	10439714
chr1	10439785
chr1	10439992
chr1	10440046
chr1	10440058
chr1	10440091
chr1	10440244
chr1	10440331
chr1	10440385
chr1	10440541
chr1	10440574
chr1	10440735
chr1	10441230
chr1	10442705
chr1	10445726
chr1	10446249
chr1	10446552
chr1	10446735
chr1	10446782
chr1	10446925
chr1	10448102
chr1	10448111
chr1	10449685
chr1	10458662
chr1	10458674
chr1	10459699
chr1	10460047
chr1	10460424
chr1	10460457
chr1	10460678
chr1	10460990
chr1	10461493
chr1	10461767
chr1	10462018
chr1	10462311
chr1	10462356
chr1	10462389
chr1	10462395
chr1	10462422
chr1	10462542
chr1	10462551
chr1	10462614
chr1	10462647
chr1	10462656
chr1	10462679
chr1	10462699
chr1	10466186
chr1	10466543
chr1	10469171
chr1	10471607
chr1	10472047
chr1	10472171
chr1	10472201
chr1	10481991
chr1	10482050
chr1	10483008
chr1	10483185
chr1	10483599
chr1	10486584
chr1	10491741
chr1	10492576
chr1	10493167
chr1	10493168
chr1	10493169
chr1	10493310
chr1	10493311
chr1	10493354
chr1	10493403
chr1	10493574
chr1	10493577
chr1	10493691
chr1	10493901
chr1	10493928
chr1	10493940
chr1	10494338
chr1	10494394
chr1	10494413
chr1	10494452
chr1	10494466
chr1	10494467
chr1	10494801
chr1	10494899
chr1	10494902
chr1	10499242
chr1	10500499
chr1	10500592
chr1	10501212
chr1	10501870
chr1	10502139
chr1	10502143
chr1	10503820
chr1	10503821
chr1	10503963
chr1	10508207
chr1	10508259
chr1	10508830
chr1	10508852
chr1	10510232
chr1	10513321
chr1	10513458
chr1	10514435
chr1	10514540
chr1	10514549
chr1	10514612
chr1	10514698
chr1	10514717
chr1	10514729
chr1	10514816
chr1	10514906
chr1	10514942
chr1	10515029
chr1	10515098
chr1	10515212
chr1	10516117
chr1	10516137
chr1	10537532
chr1	10539584
chr1	10545307
chr1	10547599
chr1	10547768
chr1	10559825
chr1	10561272
chr1	10572372
chr1	10573189
chr1	10582152
chr1	10582378
chr1	10582668
chr1	10583065
chr1	10583074
chr1	10583329
chr1	10583364
chr1	10583428
chr1	10583992
chr1	10584006
chr1	10584281
chr1	10584760
chr1	10584824
chr1	10587901
chr1	10588339
chr1	10588962
chr1	10589287
chr1	10596524
chr1	10596802
chr1	10596859
chr1	10597126
chr1	10597128
chr1	10597311
chr1	10619431
chr1	10619830
chr1	10625136
chr1	10626231
chr1	10626343
chr1	10626411
chr1	10626595
chr1	10626766
chr1	10627035
chr1	10632927
chr1	10633028
chr1	10633158
chr1	10633164
chr1	10633167
chr1	10633247
chr1	10633289
chr1	10633404
chr1	10633684
chr1	10633696
chr1	10633800
chr1	10633963
chr1	10634478
chr1	10634643
chr1	10639236
chr1	10640661
chr1	10640663
chr1	10640734
chr1	10640853
chr1	10641379
chr1	10641426
chr1	10641470
chr1	10641598
chr1	10641750
chr1	10642136
chr1	10645399
chr1	10654770
chr1	10654773
chr1	10654952
chr1	10655052
chr1	10655132
chr1	10655145
chr1	10655265
chr1	10655673
chr1	10656157
chr1	10657599
chr1	10657616
chr1	10658394
chr1	10658440
chr1	10669086
chr1	10669101
chr1	10669344
chr1	10669361
chr1	10669580
chr1	10669733
chr1	10669811
chr1	10669988
chr1	10670112
chr1	10670264
chr1	10670479
chr1	10670496
chr1	10670512
chr1	10670620
chr1	10670665
chr1	10670821
chr1	10670829
chr1	10671079
chr1	10671235
chr1	10671286
chr1	10671334
chr1	10671436
chr1	10671498
chr1	10671513
chr1	10671725
chr1	10671727
chr1	10671772
chr1	10671904
chr1	10672065
chr1	10672150
chr1	10672228
chr1	10672230
chr1	10672264
chr1	10672302
chr1	10672546
chr1	10672573
chr1	10673126
chr1	10673625
chr1	10673944
chr1	10674169
chr1	10674379
chr1	10674813
chr1	10674839
chr1	10675297
chr1	10680335
chr1	10681406
chr1	10681643
chr1	10682354
chr1	10682685
chr1	10687101
chr1	10687200
chr1	10688688
chr1	10689455
chr1	10690129
chr1	10690334
chr1	10690638
chr1	10715871
chr1	10716710
chr1	10716845
chr1	10728487
chr1	10728602
chr1	10729046
chr1	10730898
chr1	10730912
chr1	10731107
chr1	10734028
chr1	10734145
chr1	10734531
chr1	10735456
chr1	10736555
chr1	10737912
chr1	10737983
chr1	10741058
chr1	10742448
chr1	10742770
chr1	10744418
chr1	10745316
chr1	10746290
chr1	10747326
chr1	10747391
chr1	10752614
chr1	10754564
chr1	10759105
chr1	10764120
chr1	10765442
chr1	10765856
chr1	10766016
chr1	10769296
chr1	10771297
chr1	10772027
chr1	10773449
chr1	10773811
chr1	10773939
chr1	10773976
chr1	10780602
chr1	10783133
chr1	10783675
chr1	10783817
chr1	10784055
chr1	10784296
chr1	10785215
chr1	10785359
chr1	10785905
chr1	10786034
chr1	10786192
chr1	10788495
chr1	10788755
chr1	10788855
chr1	10788965
chr1	10789009
chr1	10789864
chr1	10790656
chr1	10790677
chr1	10790679
chr1	10790725
chr1	10790728
chr1	10790794
chr1	10790795
chr1	10790797
chr1	10791318
chr1	10791411
chr1	10791521
chr1	10791645
chr1	10791782
chr1	10796568
chr1	10800153
chr1	10800154
chr1	10804451
chr1	10804462
chr1	10804540
chr1	10804627
chr1	10804643
chr1	10804777
chr1	10804814
chr1	10805034
chr1	10805100
chr1	10805561
chr1	10805612
chr1	10807228
chr1	10807240
chr1	10807288
chr1	10807354
chr1	10807423
chr1	10807429
chr1	10807434
chr1	10807450
chr1	10807785
chr1	10807830
chr1	10807833
chr1	10807860
chr1	10808059
chr1	10808119
chr1	10808122
chr1	10808158
chr1	10808182
chr1	10808191
chr1	10808227
chr1	10808337
chr1	10808341
chr1	10808359
chr1	10808378
chr1	10808602
chr1	10808607
chr1	10808714
chr1	10811729
chr1	10816302
chr1	10816314
chr1	10816332
chr1	10816345
chr1	10816399
chr1	10816520
chr1	10816849
chr1	10816860
chr1	10816919
chr1	10816934
chr1	10816958
chr1	10818883
chr1	10818884
chr1	10820481
chr1	10820484
chr1	10820932
chr1	10821403
chr1	10821459
chr1	10821522
chr1	10821661
chr1	10821725
chr1	10821764
chr1	10828558
chr1	10828725
chr1	10828917
chr1	10829053
chr1	10830036
chr1	10830765
chr1	10831281
chr1	10833583
chr1	10834566
chr1	10836075
chr1	10837515
chr1	10838202
chr1	10838359
chr1	10838527
chr1	10838688
chr1	10841461
chr1	10841635
chr1	10842801
chr1	10844820
chr1	10848195
chr1	10848488
chr1	10848509
chr1	10849107
chr1	10849638
chr1	10850544
chr1	10855469
chr1	10856348
chr1	10857724
chr1	10857799
chr1	10858310
chr1	10860808
chr1	10860971
chr1	10861042
chr1	10863079
chr1	10863720
chr1	10863773
chr1	10864454
chr1	10878052
chr1	10883522
chr1	10883572
chr1	10883778
chr1	10884031
chr1	10884139
chr1	10884169
chr1	10884291
chr1	10884628
chr1	10884894
chr1	10884930
chr1	10884933
chr1	10885026
chr1	10885031
chr1	10885368
chr1	10886258
chr1	10886332
chr1	10889063
chr1	10889679
chr1	10890095
chr1	10893630
chr1	10893699
chr1	10898797
chr1	10898949
chr1	10901255
chr1	10902036
chr1	10902284
chr1	10902287
chr1	10902368
chr1	10903146
chr1	10903153
chr1	10903249
chr1	10903262
chr1	10903310
chr1	10903314
chr1	10903690
chr1	10903841
chr1	10903862
chr1	10906520
chr1	10906534
chr1	10908165
chr1	10909255
chr1	10924213
chr1	10924216
chr1	10925004
chr1	10930648
chr1	10930892
chr1	10938134
chr1	10939082
chr1	10939329
chr1	10940548
chr1	10940875
chr1	10945118
chr1	10945337
chr1	10945376
chr1	10946215
chr1	10946830
chr1	10948029
chr1	10967213
chr1	10967512
chr1	10967533
chr1	10967596
chr1	10967721
chr1	10967758
chr1	10967887
chr1	10967924
chr1	10967927
chr1	10968056
chr1	10968314
chr1	10968366
chr1	10968497
chr1	10968617
chr1	10968644
chr1	10968697
chr1	10968856
chr1	10979893
chr1	10980372
chr1	10980505
chr1	10986673
chr1	10986716
chr1	10986753
chr1	10987812
chr1	10988308
chr1	10988374
chr1	10988541
chr1	10988593
chr1	10988605
chr1	10989100
chr1	10989217
chr1	10989292
chr1	10993149
chr1	10993154
chr1	10993169
chr1	10995505
chr1	10995521
chr1	10996047
chr1	11001112
chr1	11001113
chr1	11001423
chr1	11017745
chr1	11018078
chr1	11018251
chr1	11018508
chr1	11018591
chr1	11018657
chr1	11018755
chr1	11018849
chr1	11018899
chr1	11021903
chr1	11022272
chr1	11022282
chr1	11022750
chr1	11022779
chr1	11022839
chr1	11022853
chr1	11022870
chr1	11022899
chr1	11022955
chr1	11023078
chr1	11023083
chr1	11023085
chr1	11037893
chr1	11039416
chr1	11039831
chr1	11039959
chr1	11041328
chr1	11041637
chr1	11041709
chr1	11042484
chr1	11054826
chr1	11054868
chr1	11055155
chr1	11055288
chr1	11055364
chr1	11055424
chr1	11055451
chr1	11055627
chr1	11055667
chr1	11055849
chr1	11055876
chr1	11055987
chr1	11055993
chr1	11055996
chr1	11056023
chr1	11056520
chr1	11056544
chr1	11056604
chr1	11056686
chr1	11056810
chr1	11056812
chr1	11057387
chr1	11057390
chr1	11057396
chr1	11057945
chr1	11057950
chr1	11058003
chr1	11058005
chr1	11058032
chr1	11058348
chr1	11058363
chr1	11058601
chr1	11058862
chr1	11069954
chr1	11087140
chr1	11087710
chr1	11088307
chr1	11104987
chr1	11105002
chr1	11105053
chr1	11105080
chr1	11105125
chr1	11105221
chr1	11105359
chr1	11105446
chr1	11105449
chr1	11105476
chr1	11105593
chr1	11105661
chr1	11105695
chr1	11105700
chr1	11107489
chr1	11107528
chr1	11107558
chr1	11115350
chr1	11115383
chr1	11115401
chr1	11115422
chr1	11115472
chr1	11115476
chr1	11115479
chr1	11115566
chr1	11120135
chr1	11121298
chr1	11121311
chr1	11121313
chr1	11121372
chr1	11121452
chr1	11121499
chr1	11121519
chr1	11121548
chr1	11121943
chr1	11122465
chr1	11122494
chr1	11122695
chr1	11122844
chr1	11122847
chr1	11122860
chr1	11122913
chr1	11122922
chr1	11123063
chr1	11123066
chr1	11123132
chr1	11123391
chr1	11123568
chr1	11123576
chr1	11123645
chr1	11123660
chr1	11123859
chr1	11123942
chr1	11124082
chr1	11133586
chr1	11133687
chr1	11134075
chr1	11134080
chr1	11134234
chr1	11134575
chr1	11140712
chr1	11140803
chr1	11141219
chr1	11141255
chr1	11141410
chr1	11141434
chr1	11141580
chr1	11141733
chr1	11142331
chr1	11143028
chr1	11143043
chr1	11143908
chr1	11144093
chr1	11144332
chr1	11144354
chr1	11145612
chr1	11146280
chr1	11146495
chr1	11146606
chr1	11157000
chr1	11157048
chr1	11157116
chr1	11157330
chr1	11157681
chr1	11157802
chr1	11157820
chr1	11158001
chr1	11158108
chr1	11158109
chr1	11158507
chr1	11158535
chr1	11158671
chr1	11158691
chr1	11158698
chr1	11158724
chr1	11158743
chr1	11159258
chr1	11159298
chr1	11159782
chr1	11160069
chr1	11160123
chr1	11160138
chr1	11160293
chr1	11160326
chr1	11160492
chr1	11160534
chr1	11160740
chr1	11160759
chr1	11161160
chr1	11161163
chr1	11161178
chr1	11161365
chr1	11161389
chr1	11161390
chr1	11161404
chr1	11161797
chr1	11162022
chr1	11162243
chr1	11162249
chr1	11162529
chr1	11162659
chr1	11162974
chr1	11164291
chr1	11164540
chr1	11181747
chr1	11181851
chr1	11181874
chr1	11181989
chr1	11182055
chr1	11182099
chr1	11182100
chr1	11182105
chr1	11182489
chr1	11182530
chr1	11182633
chr1	11182680
chr1	11182714
chr1	11182723
chr1	11182752
chr1	11182816
chr1	11182861
chr1	11183184
chr1	11183299
chr1	11183339
chr1	11183377
chr1	11183437
chr1	11183573
chr1	11183694
chr1	11183743
chr1	11183752
chr1	11183774
chr1	11183842
chr1	11183906
chr1	11183909
chr1	11183934
chr1	11183997
chr1	11184029
chr1	11184350
chr1	11184455
chr1	11184460
chr1	11184482
chr1	11184584
chr1	11184662
chr1	11184728
chr1	11184770
chr1	11184794
chr1	11184911
chr1	11184938
chr1	11185007
chr1	11185244
chr1	11185318
chr1	11193854
chr1	11194295
chr1	11194297
chr1	11194773
chr1	11194785
chr1	11213104
chr1	11215652
chr1	11217958
chr1	11218256
chr1	11218459
chr1	11218971
chr1	11219074
chr1	11221428
chr1	11221454
chr1	11221466
chr1	11221530
chr1	11221639
chr1	11221669
chr1	11222439
chr1	11235056
chr1	11235695
chr1	11236406
chr1	11236629
chr1	11237377
chr1	11247088
chr1	11250565
chr1	11251010
chr1	11251188
chr1	11251377
chr1	11251436
chr1	11251611
chr1	11251943
chr1	11252439
chr1	11252814
chr1	11252851
chr1	11252877
chr1	11253160
chr1	11253432
chr1	11253536
chr1	11253582
chr1	11253618
chr1	11253672
chr1	11253682
chr1	11253718
chr1	11253737
chr1	11253772
chr1	11253841
chr1	11254321
chr1	11254328
chr1	11254652
chr1	11254682
chr1	11254964
chr1	11255061
chr1	11255332
chr1	11255366
chr1	11256024
chr1	11256074
chr1	11256093
chr1	11256559
chr1	11256592
chr1	11256631
chr1	11256667
chr1	11256695
chr1	11256697
chr1	11256834
chr1	11256844
chr1	11256861
chr1	11257184
chr1	11257217
chr1	11257229
chr1	11257283
chr1	11257472
chr1	11257721
chr1	11257784
chr1	11258607
chr1	11258673
chr1	11261611
chr1	11261750
chr1	11261753
chr1	11261792
chr1	11261897
chr1	11261913
chr1	11261919
chr1	11261924
chr1	11261990
chr1	11262194
chr1	11262313
chr1	11262314
chr1	11262360
chr1	11262368
chr1	11262369
chr1	11262415
chr1	11262531
chr1	11262750
chr1	11262958
chr1	11262981
chr1	11263017
chr1	11263074
chr1	11263078
chr1	11263110
chr1	11263126
chr1	11263138
chr1	11263246
chr1	11263342
chr1	11263627
chr1	11263636
chr1	11263720
chr1	11263732
chr1	11263738
chr1	11263845
chr1	11263936
chr1	11263950
chr1	11263956
chr1	11264005
chr1	11264008
chr1	11264074
chr1	11264078
chr1	11264079
chr1	11264633
chr1	11264660
chr1	11264690
chr1	11264702
chr1	11264777
chr1	11264798
chr1	11264831
chr1	11264843
chr1	11269459
chr1	11269648
chr1	11269955
chr1	11270446
chr1	11270651
chr1	11270684
chr1	11271402
chr1	11271480
chr1	11271538
chr1	11273947
chr1	11288585
chr1	11288940
chr1	11288988
chr1	11289369
chr1	11289393
chr1	11289402
chr1	11290159
chr1	11290266
chr1	11290307
chr1	11291161
chr1	11291222
chr1	11291540
chr1	11291655
chr1	11291746
chr1	11292058
chr1	11292085
chr1	11292215
chr1	11292268
chr1	11292468
chr1	11314783
chr1	11314827
chr1	11315281
chr1	11333118
chr1	11333380
chr1	11359691
chr1	11359769
chr1	11359842
chr1	11359845
chr1	11359927
chr1	11360051
chr1	11360074
chr1	11360171
chr1	11360206
chr1	11360236
chr1	11360467
chr1	11360503
chr1	11360551
chr1	11360929
chr1	11361397
chr1	11361525
chr1	11361883
chr1	11361886
chr1	11362170
chr1	11362541
chr1	11362641
chr1	11363073
chr1	11363532
chr1	11363599
chr1	11363615
chr1	11363797
chr1	11363808
chr1	11363811
chr1	11363826
chr1	11363916
chr1	11363988
chr1	11364053
chr1	11364131
chr1	11370610
chr1	11370720
chr1	11370794
chr1	11370851
chr1	11370874
chr1	11370881
chr1	11370893
chr1	11371096
chr1	11371116
chr1	11371121
chr1	11371568
chr1	11371614
chr1	11371759
chr1	11371837
chr1	11371873
chr1	11371876
chr1	11371998
chr1	11372038
chr1	11372617
chr1	11372677
chr1	11373243
chr1	11373265
chr1	11373344
chr1	11373657
chr1	11373725
chr1	11374111
chr1	11374295
chr1	11374743
chr1	11379139
chr1	11391370
chr1	11391400
chr1	11391482
chr1	11392560
chr1	11392596
chr1	11392820
chr1	11392847
chr1	11392871
chr1	11393199
chr1	11393213
chr1	11393240
chr1	11393250
chr1	11393255
chr1	11393357
chr1	11393603
chr1	11393777
chr1	11393902
chr1	11393951
chr1	11394208
chr1	11394214
chr1	11394277
chr1	11394337
chr1	11394556
chr1	11395157
chr1	11395449
chr1	11396831
chr1	11397449
chr1	11397450
chr1	11398764
chr1	11400324
chr1	11401006
chr1	11401527
chr1	11402594
chr1	11403444
chr1	11411023
chr1	11411566
chr1	11411731
chr1	11411752
chr1	11412168
chr1	11412749
chr1	11412968
chr1	11413100
chr1	11413101
chr1	11413108
chr1	11414013
chr1	11414020
chr1	11414113
chr1	11414207
chr1	11414323
chr1	11414371
chr1	11414983
chr1	11415022
chr1	11415049
chr1	11415055
chr1	11415705
chr1	11415940
chr1	11416103
chr1	11416281
chr1	11419628
chr1	11420171
chr1	11420249
chr1	11420291
chr1	11420414
chr1	11420489
chr1	11422888
chr1	11423229
chr1	11423321
chr1	11424419
chr1	11425644
chr1	11426044
chr1	11426566
chr1	11426705
chr1	11430375
chr1	11431188
chr1	11431350
chr1	11431361
chr1	11431364
chr1	11431553
chr1	11431554
chr1	11431586
chr1	11431601
chr1	11431616
chr1	11431649
chr1	11431775
chr1	11431985
chr1	11432009
chr1	11432039
chr1	11432048
chr1	11432078
chr1	11432132
chr1	11432380
chr1	11432443
chr1	11432485
chr1	11432518
chr1	11432548
chr1	11432551
chr1	11432560
chr1	11432593
chr1	11432611
chr1	11432638
chr1	11432656
chr1	11432713
chr1	11432716
chr1	11432719
chr1	11432819
chr1	11432827
chr1	11432836
chr1	11433024
chr1	11433240
chr1	11433258
chr1	11433386
chr1	11433410
chr1	11434231
chr1	11434233
chr1	11435072
chr1	11435700
chr1	11436154
chr1	11437590
chr1	11437730
chr1	11438318
chr1	11439844
chr1	11454649
chr1	11454663
chr1	11458675
chr1	11458747
chr1	11458815
chr1	11458859
chr1	11458938
chr1	11459374
chr1	11459376
chr1	11459481
chr1	11460394
chr1	11460584
chr1	11460795
chr1	11460849
chr1	11460931
chr1	11461309
chr1	11461361
chr1	11461510
chr1	11461554
chr1	11461604
chr1	11461972
chr1	11462131
chr1	11462633
chr1	11462960
chr1	11465175
chr1	11465808
chr1	11465912
chr1	11465918
chr1	11466025
chr1	11466974
chr1	11467973
chr1	11468057
chr1	11469602
chr1	11469737
chr1	11469805
chr1	11470397
chr1	11470428
chr1	11470479
chr1	11472354
chr1	11472399
chr1	11472470
chr1	11472488
chr1	11472655
chr1	11478718
chr1	11480283
chr1	11480538
chr1	11480968
chr1	11480995
chr1	11481340
chr1	11481500
chr1	11481675
chr1	11481815
chr1	11482150
chr1	11482177
chr1	11482297
chr1	11482662
chr1	11482728
chr1	11523911
chr1	11523927
chr1	11523954
chr1	11523972
chr1	11528556
chr1	11528574
chr1	11528580
chr1	11528611
chr1	11529618
chr1	11529972
chr1	11531149
chr1	11531203
chr1	11534759
chr1	11535272
chr1	11536115
chr1	11536172
chr1	11540472
chr1	11540795
chr1	11543742
chr1	11553195
chr1	11553479
chr1	11554334
chr1	11554494
chr1	11554514
chr1	11554655
chr1	11554690
chr1	11554823
chr1	11555287
chr1	11555434
chr1	11555458
chr1	11556896
chr1	11557007
chr1	11557069
chr1	11557208
chr1	11557354
chr1	11557387
chr1	11557417
chr1	11557990
chr1	11558077
chr1	11558179
chr1	11558323
chr1	11558326
chr1	11558377
chr1	11558554
chr1	11558587
chr1	11558984
chr1	11559257
chr1	11559310
chr1	11559440
chr1	11559647
chr1	11559870
chr1	11560313
chr1	11561584
chr1	11565949
chr1	11568406
chr1	11569229
chr1	11569237
chr1	11569242
chr1	11569324
chr1	11569336
chr1	11569343
chr1	11569743
chr1	11569749
chr1	11569752
chr1	11570067
chr1	11575481
chr1	11575519
chr1	11575556
chr1	11576049
chr1	11577455
chr1	11577614
chr1	11577620
chr1	11593088
chr1	11593314
chr1	11593486
chr1	11594371
chr1	11601828
chr1	11602982
chr1	11603112
chr1	11603334
chr1	11603696
chr1	11604697
chr1	11604724
chr1	11604795
chr1	11604801
chr1	11605827
chr1	11606073
chr1	11606074
chr1	11606450
chr1	11606633
chr1	11606993
chr1	11607010
chr1	11607454
chr1	11607613
chr1	11607684
chr1	11608401
chr1	11608414
chr1	11608424
chr1	11608582
chr1	11608739
chr1	11608771
chr1	11608900
chr1	11609105
chr1	11609318
chr1	11609417
chr1	11609537
chr1	11609587
chr1	11609606
chr1	11609651
chr1	11609658
chr1	11612574
chr1	11612752
chr1	11613357
chr1	11613496
chr1	11613678
chr1	11615602
chr1	11630126
chr1	11640850
chr1	11654234
chr1	11654609
chr1	11657764
chr1	11657858
chr1	11660195
chr1	11660245
chr1	11663687
chr1	11665692
chr1	11670614
chr1	11670637
chr1	11670656
chr1	11670659
chr1	11672203
chr1	11672216
chr1	11672244
chr1	11673156
chr1	11673320
chr1	11673372
chr1	11673675
chr1	11673762
chr1	11673766
chr1	11673891
chr1	11673897
chr1	11673910
chr1	11674161
chr1	11674913
chr1	11674919
chr1	11674972
chr1	11674973
chr1	11675013
chr1	11675035
chr1	11675042
chr1	11675087
chr1	11675163
chr1	11675250
chr1	11677064
chr1	11677085
chr1	11677100
chr1	11677115
chr1	11677366
chr1	11677369
chr1	11677595
chr1	11677622
chr1	11677640
chr1	11678031
chr1	11678075
chr1	11678194
chr1	11678273
chr1	11685170
chr1	11689815
chr1	11690099
chr1	11690637
chr1	11690965
chr1	11691200
chr1	11694529
chr1	11694580
chr1	11695707
chr1	11695753
chr1	11695778
chr1	11696138
chr1	11696174
chr1	11696352
chr1	11696353
chr1	11696384
chr1	11696554
chr1	11696611
chr1	11696945
chr1	11696967
chr1	11697072
chr1	11697095
chr1	11697251
chr1	11697278
chr1	11697425
chr1	11697428
chr1	11697536
chr1	11697875
chr1	11712332
chr1	11712398
chr1	11713199
chr1	11714515
chr1	11738254
chr1	11738306
chr1	11738691
chr1	11738790
chr1	11738817
chr1	11738972
chr1	11738997
chr1	11739008
chr1	11739068
chr1	11739738
chr1	11740759
chr1	11742137
chr1	11742151
chr1	11742612
chr1	11742979
chr1	11744606
chr1	11745747
chr1	11747026
chr1	11747689
chr1	11748026
chr1	11748303
chr1	11748577
chr1	11749074
chr1	11749241
chr1	11749387
chr1	11749852
chr1	11749934
chr1	11750271
chr1	11750890
chr1	11751502
chr1	11751897
chr1	11759590
chr1	11759661
chr1	11759744
chr1	11760267
chr1	11760610
chr1	11760615
chr1	11761361
chr1	11761650
chr1	11762177
chr1	11773302
chr1	11773345
chr1	11773547
chr1	11774131
chr1	11774717
chr1	11774765
chr1	11774828
chr1	11774831
chr1	11774860
chr1	11774869
chr1	11775095
chr1	11775108
chr1	11775170
chr1	11777273
chr1	11778487
chr1	11778494
chr1	11780194
chr1	11781223
chr1	11781956
chr1	11782183
chr1	11782367
chr1	11782368
chr1	11783453
chr1	11783684
chr1	11783978
chr1	11784159
chr1	11784223
chr1	11784361
chr1	11785048
chr1	11785124
chr1	11785409
chr1	11785455
chr1	11785505
chr1	11785509
chr1	11785859
chr1	11785908
chr1	11786518
chr1	11786548
chr1	11786556
chr1	11787663
chr1	11795793
chr1	11796307
chr1	11796370
chr1	11796672
chr1	11797510
chr1	11797928
chr1	11797939
chr1	11799698
chr1	11800791
chr1	11800950
chr1	11821148
chr1	11821151
chr1	11821190
chr1	11827586
chr1	11828559
chr1	11828925
chr1	11829075
chr1	11829589
chr1	11829598
chr1	11833271
chr1	11833287
chr1	11833303
chr1	11833304
chr1	11833522
chr1	11833797
chr1	11833924
chr1	11841856
chr1	11845612
chr1	11846761
chr1	11846815
chr1	11847578
chr1	11847708
chr1	11847994
chr1	11849638
chr1	11852721
chr1	11852917
chr1	11854492
chr1	11858297
chr1	11859295
chr1	11859371
chr1	11875282
chr1	11875314
chr1	11875392
chr1	11875393
chr1	11875616
chr1	11875819
chr1	11876928
chr1	11884159
chr1	11884678
chr1	11885098
chr1	11885245
chr1	11907442
chr1	11907464
chr1	11907868
chr1	11908060
chr1	11908102
chr1	11908429
chr1	11908789
chr1	11908823
chr1	11908895
chr1	11913160
chr1	11920577
chr1	11921283
chr1	11921981
chr1	11922272
chr1	11922418
chr1	11929076
chr1	11929089
chr1	11929175
chr1	11929180
chr1	11929195
chr1	11929201
chr1	11929215
chr1	11929292
chr1	11931355
chr1	11931450
chr1	11931451
chr1	11931475
chr1	11931517
chr1	11931660
chr1	11931680
chr1	11931684
chr1	11932016
chr1	11937630
chr1	11937859
chr1	11938865
chr1	11939015
chr1	11939367
chr1	11939379
chr1	11939536
chr1	11939705
chr1	11940127
chr1	11940544
chr1	11940587
chr1	11940608
chr1	11940727
chr1	11940730
chr1	11940775
chr1	11940869
chr1	11940923
chr1	11943286
chr1	11943317
chr1	11944163
chr1	11944269
chr1	11944517
chr1	11956858
chr1	11966710
chr1	11967214
chr1	11967509
chr1	11967630
chr1	11967811
chr1	11967818
chr1	11967883
chr1	11968043
chr1	11968373
chr1	11968463
chr1	11968629
chr1	11968723
chr1	11969021
chr1	11969028
chr1	11969029
chr1	11969047
chr1	11969166
chr1	11969259
chr1	11969281
chr1	11969307
chr1	11969313
chr1	11969378
chr1	11969421
chr1	11969448
chr1	11969574
chr1	11969580
chr1	11969668
chr1	11969690
chr1	11969870
chr1	11969952
chr1	11970074
chr1	11970108
chr1	11970111
chr1	11970144
chr1	11970189
chr1	11970192
chr1	11970198
chr1	11970231
chr1	11970275
chr1	11970279
chr1	11970354
chr1	11970393
chr1	11970420
chr1	11970428
chr1	11970489
chr1	11970498
chr1	11970666
chr1	11976882
chr1	11977075
chr1	11977713
chr1	12005207
chr1	12005885
chr1	12006097
chr1	12006548
chr1	12007194
chr1	12007198
chr1	12007469
chr1	12007612
chr1	12007785
chr1	12007845
chr1	12007866
chr1	12008159
chr1	12008165
chr1	12008669
chr1	12008714
chr1	12011609
chr1	12011630
chr1	12012039
chr1	12024011
chr1	12024157
chr1	12024188
chr1	12024245
chr1	12024257
chr1	12024392
chr1	12024514
chr1	12024615
chr1	12024636
chr1	12024750
chr1	12024755
chr1	12046720
chr1	12046721
chr1	12047363
chr1	12048891
chr1	12051741
chr1	12052245
chr1	12052309
chr1	12052322
chr1	12052358
chr1	12052367
chr1	12052516
chr1	12052517
chr1	12052634
chr1	12053144
chr1	12057593
chr1	12064845
chr1	12064897
chr1	12065949
chr1	12066132
chr1	12066745
chr1	12067522
chr1	12067712
chr1	12067855
chr1	12068269
chr1	12068778
chr1	12068910
chr1	12069527
chr1	12074536
chr1	12074542
chr1	12074551
chr1	12075314
chr1	12075368
chr1	12075608
chr1	12075856
chr1	12075920
chr1	12075935
chr1	12075994
chr1	12076050
chr1	12076143
chr1	12076144
chr1	12078734
chr1	12079605
chr1	12081366
chr1	12081585
chr1	12081596
chr1	12081780
chr1	12081950
chr1	12082178
chr1	12083044
chr1	12083385
chr1	12083444
chr1	12083956
chr1	12085517
chr1	12086433
chr1	12086448
chr1	12088269
chr1	12089795
chr1	12090355
chr1	12090509
chr1	12096054
chr1	12096257
chr1	12096398
chr1	12101244
chr1	12101643
chr1	12101954
chr1	12102766
chr1	12103577
chr1	12103853
chr1	12104112
chr1	12104923
chr1	12104999
chr1	12107077
chr1	12107466
chr1	12107580
chr1	12108401
chr1	12108678
chr1	12109199
chr1	12109439
chr1	12110003
chr1	12110046
chr1	12111396
chr1	12111401
chr1	12111563
chr1	12111722
chr1	12114702
chr1	12114715
chr1	12115793
chr1	12117101
chr1	12118470
chr1	12118759
chr1	12119224
chr1	12119555
chr1	12120883
chr1	12121168
chr1	12122184
chr1	12122254
chr1	12122584
chr1	12122903
chr1	12123278
chr1	12123646
chr1	12123777
chr1	12123813
chr1	12148649
chr1	12148840
chr1	12148863
chr1	12148896
chr1	12148911
chr1	12149067
chr1	12149097
chr1	12149728
chr1	12150098
chr1	12150163
chr1	12150178
chr1	12150204
chr1	12150362
chr1	12150364
chr1	12150733
chr1	12150741
chr1	12150778
chr1	12150788
chr1	12151250
chr1	12152191
chr1	12152974
chr1	12157222
chr1	12157358
chr1	12157411
chr1	12157428
chr1	12157447
chr1	12157478
chr1	12157539
chr1	12157550
chr1	12157625
chr1	12157680
chr1	12157807
chr1	12157954
chr1	12157972
chr1	12158059
chr1	12158110
chr1	12158133
chr1	12158316
chr1	12158319
chr1	12158334
chr1	12158379
chr1	12158391
chr1	12158645
chr1	12158793
chr1	12158865
chr1	12169407
chr1	12170787
chr1	12171329
chr1	12178103
chr1	12178204
chr1	12178208
chr1	12178218
chr1	12178681
chr1	12178684
chr1	12178735
chr1	12178759
chr1	12178762
chr1	12179143
chr1	12179279
chr1	12181370
chr1	12181699
chr1	12188834
chr1	12188939
chr1	12189173
chr1	12189373
chr1	12189388
chr1	12189473
chr1	12189476
chr1	12189593
chr1	12189632
chr1	12189641
chr1	12189704
chr1	12189705
chr1	12189757
chr1	12189860
chr1	12189942
chr1	12190106
chr1	12191525
chr1	12192494
chr1	12192531
chr1	12192624
chr1	12193400
chr1	12193701
chr1	12193889
chr1	12194711
chr1	12194735
chr1	12194989
chr1	12195889
chr1	12196178
chr1	12196429
chr1	12196438
chr1	12196712
chr1	12196778
chr1	12196861
chr1	12196929
chr1	12197066
chr1	12197078
chr1	12197083
chr1	12197085
chr1	12197391
chr1	12197445
chr1	12197455
chr1	12197478
chr1	12197492
chr1	12197576
chr1	12197607
chr1	12197609
chr1	12197707
chr1	12197722
chr1	12197798
chr1	12197875
chr1	12197955
chr1	12198006
chr1	12198270
chr1	12198435
chr1	12198477
chr1	12198502
chr1	12198511
chr1	12199891
chr1	12199893
chr1	12200673
chr1	12205661
chr1	12205713
chr1	12205714
chr1	12205921
chr1	12206885
chr1	12207517
chr1	12208017
chr1	12244820
chr1	12244883
chr1	12244910
chr1	12244934
chr1	12245075
chr1	12245120
chr1	12245234
chr1	12245273
chr1	12245399
chr1	12245405
chr1	12245550
chr1	12245604
chr1	12245634
chr1	12245946
chr1	12245947
chr1	12245954
chr1	12257227
chr1	12257666
chr1	12257682
chr1	12258118
chr1	12258146
chr1	12258149
chr1	12258262
chr1	12258347
chr1	12258622
chr1	12259176
chr1	12262544
chr1	12265119
chr1	12265143
chr1	12265146
chr1	12265173
chr1	12265302
chr1	12266165
chr1	12266544
chr1	12266747
chr1	12266862
chr1	12349573
chr1	12349647
chr1	12349665
chr1	12349926
chr1	12349941
chr1	12350183
chr1	12350423
chr1	12350473
chr1	12350501
chr1	12350564
chr1	12352098
chr1	12352679
chr1	12353008
chr1	12354455
chr1	12354919
chr1	12355813
chr1	12356263
chr1	12357321
chr1	12359742
chr1	12360549
chr1	12360561
chr1	12360575
chr1	12360605
chr1	12360608
chr1	12360623
chr1	12360659
chr1	12360788
chr1	12367135
chr1	12367148
chr1	12367194
chr1	12367248
chr1	12367292
chr1	12367327
chr1	12367445
chr1	12367512
chr1	12367589
chr1	12369129
chr1	12369773
chr1	12370082
chr1	12370157
chr1	12370163
chr1	12370578
chr1	12370596
chr1	12370629
chr1	12370650
chr1	12371361
chr1	12381274
chr1	12381304
chr1	12381313
chr1	12382633
chr1	12382648
chr1	12383359
chr1	12383799
chr1	12383870
chr1	12383909
chr1	12384040
chr1	12384131
chr1	12384132
chr1	12384300
chr1	12384628
chr1	12384722
chr1	12384760
chr1	12385493
chr1	12386858
chr1	12387136
chr1	12387198
chr1	12387340
chr1	12387369
chr1	12396753
chr1	12397488
chr1	12397648
chr1	12398592
chr1	12398689
chr1	12400627
chr1	12417328
chr1	12417409
chr1	12417445
chr1	12417454
chr1	12417583
chr1	12417595
chr1	12417682
chr1	12418451
chr1	12418496
chr1	12418880
chr1	12419359
chr1	12420299
chr1	12420317
chr1	12420368
chr1	12420503
chr1	12420655
chr1	12420767
chr1	12420976
chr1	12421228
chr1	12421337
chr1	12429427
chr1	12430437
chr1	12430946
chr1	12431148
chr1	12431405
chr1	12431924
chr1	12432470
chr1	12432652
chr1	12432805
chr1	12436169
chr1	12436651
chr1	12436714
chr1	12436795
chr1	12436930
chr1	12437187
chr1	12437325
chr1	12438403
chr1	12438436
chr1	12438445
chr1	12438622
chr1	12438812
chr1	12438842
chr1	12439023
chr1	12439038
chr1	12439237
chr1	12439250
chr1	12441956
chr1	12442607
chr1	12448827
chr1	12448858
chr1	12449426
chr1	12449444
chr1	12450002
chr1	12451080
chr1	12451522
chr1	12451999
chr1	12452982
chr1	12453041
chr1	12453136
chr1	12453282
chr1	12453530
chr1	12455771
chr1	12455848
chr1	12456196
chr1	12456208
chr1	12456494
chr1	12456516
chr1	12456641
chr1	12456656
chr1	12456662
chr1	12456691
chr1	12456746
chr1	12456759
chr1	12456768
chr1	12456785
chr1	12456919
chr1	12456945
chr1	12456960
chr1	12456984
chr1	12456992
chr1	12457022
chr1	12457025
chr1	12457040
chr1	12459022
chr1	12459037
chr1	12460212
chr1	12461230
chr1	12461574
chr1	12462118
chr1	12462780
chr1	12463101
chr1	12464096
chr1	12464471
chr1	12485471
chr1	12485740
chr1	12486219
chr1	12486343
chr1	12486358
chr1	12486427
chr1	12486430
chr1	12486532
chr1	12486601
chr1	12487441
chr1	12487884
chr1	12488133
chr1	12488331
chr1	12488756
chr1	12489218
chr1	12489313
chr1	12489629
chr1	12490104
chr1	12490410
chr1	12490581
chr1	12490716
chr1	12491005
chr1	12491223
chr1	12491388
chr1	12491391
chr1	12492434
chr1	12492530
chr1	12492532
chr1	12492598
chr1	12492637
chr1	12492696
chr1	12492697
chr1	12492723
chr1	12492727
chr1	12492807
chr1	12492826
chr1	12492913
chr1	12492931
chr1	12493024
chr1	12493034
chr1	12493089
chr1	12493149
chr1	12493162
chr1	12493452
chr1	12493458
chr1	12493502
chr1	12493514
chr1	12493565
chr1	12493575
chr1	12493730
chr1	12493732
chr1	12493891
chr1	12493950
chr1	12494059
chr1	12494065
chr1	12494092
chr1	12494188
chr1	12494298
chr1	12494362
chr1	12503554
chr1	12503638
chr1	12503697
chr1	12503715
chr1	12503803
chr1	12503848
chr1	12503970
chr1	12503985
chr1	12504121
chr1	12504196
chr1	12504250
chr1	12504429
chr1	12504436
chr1	12504455
chr1	12504484
chr1	12504547
chr1	12504691
chr1	12504727
chr1	12504762
chr1	12504770
chr1	12504789
chr1	12504847
chr1	12505087
chr1	12505102
chr1	12505207
chr1	12505219
chr1	12505471
chr1	12505477
chr1	12505522
chr1	12515968
chr1	12516003
chr1	12520411
chr1	12520444
chr1	12521757
chr1	12524083
chr1	12524155
chr1	12524180
chr1	12524183
chr1	12524204
chr1	12524223
chr1	12524260
chr1	12524326
chr1	12538328
chr1	12538470
chr1	12539496
chr1	12541337
chr1	12541589
chr1	12543118
chr1	12543217
chr1	12544822
chr1	12545084
chr1	12545317
chr1	12545475
chr1	12545480
chr1	12545505
chr1	12545539
chr1	12545566
chr1	12545572
chr1	12545651
chr1	12545788
chr1	12545800
chr1	12545942
chr1	12546109
chr1	12546140
chr1	12550666
chr1	12551892
chr1	12552877
chr1	12553676
chr1	12553817
chr1	12582219
chr1	12582613
chr1	12585096
chr1	12585097
chr1	12585426
chr1	12585882
chr1	12585980
chr1	12587681
chr1	12588656
chr1	12589593
chr1	12597290
chr1	12597449
chr1	12597633
chr1	12598293
chr1	12598383
chr1	12598487
chr1	12598507
chr1	12598572
chr1	12599013
chr1	12599052
chr1	12600250
chr1	12600260
chr1	12600283
chr1	12600451
chr1	12600619
chr1	12600879
chr1	12601270
chr1	12601497
chr1	12601875
chr1	12601976
chr1	12602022
chr1	12602091
chr1	12602294
chr1	12602375
chr1	12602637
chr1	12602689
chr1	12602929
chr1	12602940
chr1	12603378
chr1	12603395
chr1	12603751
chr1	12603973
chr1	12604283
chr1	12605759
chr1	12646750
chr1	12647514
chr1	12648231
chr1	12649716
chr1	12650161
chr1	12655323
chr1	12655578
chr1	12655783
chr1	12655793
chr1	12656236
chr1	12660931
chr1	12661009
chr1	12661213
chr1	12661604
chr1	12662582
chr1	12662862
chr1	12663025
chr1	12663238
chr1	12663364
chr1	12663463
chr1	12663478
chr1	12663484
chr1	12663541
chr1	12663545
chr1	12663701
chr1	12685386
chr1	12685630
chr1	12685709
chr1	12685710
chr1	12685835
chr1	12685841
chr1	12685973
chr1	12686042
chr1	12686060
chr1	12686102
chr1	12686193
chr1	12687068
chr1	12687246
chr1	12687360
chr1	12687387
chr1	12687564
chr1	12687592
chr1	12687877
chr1	12688368
chr1	12700071
chr1	12700235
chr1	12700246
chr1	12700734
chr1	12736470
chr1	12736494
chr1	12736532
chr1	12736697
chr1	12736762
chr1	12736768
chr1	12736780
chr1	12737482
chr1	12743983
chr1	12745527
chr1	12746958
chr1	12746974
chr1	12747161
chr1	12747182
chr1	12747808
chr1	12747813
chr1	12748094
chr1	12748441
chr1	12749203
chr1	12749434
chr1	12749660
chr1	12749742
chr1	12750005
chr1	12750027
chr1	12750279
chr1	12840314
chr1	12840322
chr1	12840362
chr1	12840394
chr1	12840531
chr1	12840625
chr1	12840673
chr1	12840699
chr1	12840755
chr1	12852109
chr1	12852154
chr1	12852405
chr1	12852634
chr1	12852700
chr1	12852773
chr1	12852780
chr1	12852781
chr1	12852958
chr1	12853073
chr1	12853112
chr1	12867287
chr1	12867308
chr1	12867329
chr1	12867527
chr1	12867740
chr1	12867908
chr1	12868045
chr1	12868100
chr1	12868466
chr1	12868510
chr1	12868558
chr1	12868581
chr1	12868684
chr1	12868689
chr1	12891537
chr1	12891840
chr1	12905344
chr1	12905469
chr1	12905632
chr1	12905747
chr1	12905789
chr1	12905850
chr1	12905979
chr1	12906012
chr1	12906093
chr1	12908125
chr1	12908258
chr1	12909566
chr1	12909987
chr1	12911657
chr1	12913235
chr1	12914117
chr1	12922962
chr1	12923161
chr1	12923200
chr1	12923563
chr1	12923677
chr1	12924091
chr1	12924685
chr1	12924825
chr1	12942553
chr1	12942741
chr1	12942760
chr1	12977886
chr1	12977893
chr1	12977894
chr1	12978463
chr1	12978973
chr1	12978979
chr1	12979004
chr1	12979335
chr1	12979383
chr1	12979630
chr1	12979632
chr1	12979665
chr1	12979701
chr1	12979725
chr1	12993648
chr1	12993873
chr1	12993931
chr1	12994355
chr1	12994395
chr1	12994502
chr1	12994540
chr1	12994602
chr1	12994656
chr1	12994691
chr1	12994965
chr1	12995024
chr1	12995375
chr1	12995496
chr1	12995545
chr1	12995643
chr1	12995804
chr1	12995834
chr1	12995945
chr1	12996099
chr1	12996177
chr1	13019782
chr1	13020282
chr1	13020643
chr1	13022028
chr1	13022168
chr1	13022488
chr1	13023763
chr1	13026625
chr1	13026745
chr1	13026944
chr1	13027060
chr1	13027136
chr1	13027139
chr1	13027496
chr1	13027529
chr1	13028708
chr1	13028752
chr1	13028865
chr1	13040053
chr1	13040166
chr1	13041628
chr1	13051854
chr1	13052425
chr1	13052474
chr1	13053410
chr1	13054343
chr1	13065647
chr1	13065653
chr1	13066007
chr1	13066170
chr1	13066261
chr1	13066429
chr1	13066585
chr1	13066623
chr1	13071454
chr1	13071466
chr1	13071596
chr1	13071654
chr1	13071803
chr1	13072038
chr1	13072256
chr1	13073198
chr1	13073222
chr1	13073562
chr1	13078056
chr1	13078259
chr1	13078354
chr1	13078437
chr1	13078523
chr1	13078554
chr1	13078556
chr1	13078557
chr1	13078680
chr1	13078838
chr1	13078968
chr1	13078990
chr1	13079155
chr1	13079346
chr1	13079489
chr1	13079617
chr1	13079637
chr1	13079774
chr1	13092270
chr1	13096321
chr1	13097177
chr1	13116264
chr1	13116317
chr1	13116369
chr1	13116371
chr1	13116468
chr1	13116628
chr1	13116633
chr1	13122448
chr1	13123267
chr1	13123315
chr1	13123402
chr1	13123459
chr1	13123486
chr1	13123510
chr1	13123534
chr1	13123809
chr1	13124260
chr1	13124275
chr1	13124518
chr1	13124626
chr1	13124635
chr1	13124686
chr1	13156521
chr1	13156524
chr1	13156665
chr1	13157261
chr1	13157293
chr1	13157333
chr1	13157335
chr1	13157351
chr1	13157353
chr1	13157392
chr1	13157407
chr1	13157479
chr1	13157642
chr1	13157678
chr1	13157702
chr1	13157705
chr1	13157725
chr1	13157759
chr1	13157765
chr1	13157783
chr1	13157825
chr1	13157953
chr1	13158360
chr1	13158422
chr1	13158929
chr1	13158940
chr1	13163107
chr1	13168124
chr1	13168178
chr1	13192916
chr1	13192931
chr1	13193177
chr1	13193288
chr1	13193749
chr1	13194584
chr1	13194587
chr1	13195190
chr1	13195389
chr1	13195898
chr1	13196230
chr1	13196604
chr1	13196658
chr1	13196769
chr1	13197526
chr1	13197556
chr1	13205497
chr1	13205566
chr1	13205629
chr1	13205713
chr1	13205839
chr1	13206780
chr1	13206798
chr1	13207058
chr1	13207183
chr1	13207186
chr1	13207279
chr1	13207515
chr1	13207661
chr1	13207950
chr1	13210137
chr1	13210140
chr1	13210269
chr1	13210307
chr1	13221768
chr1	13222040
chr1	13222219
chr1	13222636
chr1	13223081
chr1	13223209
chr1	13223723
chr1	13223860
chr1	13223865
chr1	13223894
chr1	13223999
chr1	13224050
chr1	13224137
chr1	13225291
chr1	13225785
chr1	13225787
chr1	13225805
chr1	13226115
chr1	13226300
chr1	13226312
chr1	13226348
chr1	13226396
chr1	13226435
chr1	13244805
chr1	13244981
chr1	13281653
chr1	13281681
chr1	13281931
chr1	13282434
chr1	13282502
chr1	13282802
chr1	13282806
chr1	13283003
chr1	13298300
chr1	13298362
chr1	13321682
chr1	13350895
chr1	13455162
chr1	13455372
chr1	13455461
chr1	13455483
chr1	13455523
chr1	13455722
chr1	13455894
chr1	13456199
chr1	13467109
chr1	13467117
chr1	13467150
chr1	13467165
chr1	13467214
chr1	13467218
chr1	13467263
chr1	13467310
chr1	13467319
chr1	13467335
chr1	13467484
chr1	13467486
chr1	13467500
chr1	13467557
chr1	13467561
chr1	13467825
chr1	13468024
chr1	13468027
chr1	13468188
chr1	13468597
chr1	13468613
chr1	13468616
chr1	13470105
chr1	13470184
chr1	13470195
chr1	13470204
chr1	13533433
chr1	13533553
chr1	13534180
chr1	13534289
chr1	13534297
chr1	13534393
chr1	13534444
chr1	13534489
chr1	13534528
chr1	13534823
chr1	13534844
chr1	13534871
chr1	13535065
chr1	13535137
chr1	13535789
chr1	13535849
chr1	13536233
chr1	13536249
chr1	13536482
chr1	13536803
chr1	13536921
chr1	13537483
chr1	13537498
chr1	13537732
chr1	13537736
chr1	13537884
chr1	13537889
chr1	13538202
chr1	13538221
chr1	13538239
chr1	13538399
chr1	13538600
chr1	13538613
chr1	13539057
chr1	13539165
chr1	13539520
chr1	13539568
chr1	13539652
chr1	13539672
chr1	13539734
chr1	13539749
chr1	13539780
chr1	13539841
chr1	13539874
chr1	13539973
chr1	13540022
chr1	13540025
chr1	13540037
chr1	13540607
chr1	13540793
chr1	13540801
chr1	13540878
chr1	13540933
chr1	13541053
chr1	13541280
chr1	13541490
chr1	13541650
chr1	13542018
chr1	13542159
chr1	13542210
chr1	13542264
chr1	13542270
chr1	13542354
chr1	13542738
chr1	13542873
chr1	13542912
chr1	13542975
chr1	13543002
chr1	13543026
chr1	13543089
chr1	13543156
chr1	13543215
chr1	13543269
chr1	13543290
chr1	13543300
chr1	13543302
chr1	13543393
chr1	13543396
chr1	13543542
chr1	13543573
chr1	13543630
chr1	13543712
chr1	13550118
chr1	13551012
chr1	13551831
chr1	13552030
chr1	13553465
chr1	13555096
chr1	13555272
chr1	13556500
chr1	13556834
chr1	13557407
chr1	13558400
chr1	13592917
chr1	13592953
chr1	13601153
chr1	13601258
chr1	13601944
chr1	13602004
chr1	13602094
chr1	13602150
chr1	13603100
chr1	13603109
chr1	13603156
chr1	13603168
chr1	13603240
chr1	13603324
chr1	13603613
chr1	13603687
chr1	13603752
chr1	13635074
chr1	13635433
chr1	13637427
chr1	13643010
chr1	13669575
chr1	13669579
chr1	13669663
chr1	13669810
chr1	13669898
chr1	13670018
chr1	13670432
chr1	13670438
chr1	13670627
chr1	13670672
chr1	13670705
chr1	13670732
chr1	13672358
chr1	13672753
chr1	13673442
chr1	13674069
chr1	13674094
chr1	13696097
chr1	13696122
chr1	13696124
chr1	13696495
chr1	13696739
chr1	13700950
chr1	13701307
chr1	13701326
chr1	13701387
chr1	13702018
chr1	13702597
chr1	13702662
chr1	13702753
chr1	13702838
chr1	13702854
chr1	13702913
chr1	13702933
chr1	13702968
chr1	13703118
chr1	13703162
chr1	13703186
chr1	13703216
chr1	13857968
chr1	13857994
chr1	13858034
chr1	13858227
chr1	13858249
chr1	13858576
chr1	13858788
chr1	13891809
chr1	13898892
chr1	13898896
chr1	13899153
chr1	13899447
chr1	13900747
chr1	13900752
chr1	13982254
chr1	13982387
chr1	13982430
chr1	13982667
chr1	13982981
chr1	13982990
chr1	13983162
chr1	13983215
chr1	13983290
chr1	13983299
chr1	13983518
chr1	13983749
chr1	13983767
chr1	13983936
chr1	13983943
chr1	13984113
chr1	13984146
chr1	13984165
chr1	13984323
chr1	13984635
chr1	13985010
chr1	13985018
chr1	13985047
chr1	13985149
chr1	13985288
chr1	13985373
chr1	13985428
chr1	13986205
chr1	13986225
chr1	13986288
chr1	13986320
chr1	13986985
chr1	13987007
chr1	13987316
chr1	13987460
chr1	13987578
chr1	13987865
chr1	13988048
chr1	13988176
chr1	13988207
chr1	13988208
chr1	14028031
chr1	14028063
chr1	14028334
chr1	14028407
chr1	14029120
chr1	14029842
chr1	14046720
chr1	14046730
chr1	14047176
chr1	14047446
chr1	14047531
chr1	14047545
chr1	14047904
chr1	14048017
chr1	14048054
chr1	14095730
chr1	14155742
chr1	14159372
chr1	14159375
chr1	14159383
chr1	14159534
chr1	14159537
chr1	14159576
chr1	14159642
chr1	14159963
chr1	14160158
chr1	14160287
chr1	14160737
chr1	14160746
chr1	14160749
chr1	14160764
chr1	14160803
chr1	14160806
chr1	14160809
chr1	14161028
chr1	14161091
chr1	14161103
chr1	14161202
chr1	14161232
chr1	14161247
chr1	14161289
chr1	14161325
chr1	14161349
chr1	14161355
chr1	14161358
chr1	14161406
chr1	14161427
chr1	14161454
chr1	14161523
chr1	14175388
chr1	14175515
chr1	14175851
chr1	14175873
chr1	14175967
chr1	14176033
chr1	14176158
chr1	14176252
chr1	14176352
chr1	14176473
chr1	14176589
chr1	14176706
chr1	14182804
chr1	14183272
chr1	14183354
chr1	14184435
chr1	14184445
chr1	14184904
chr1	14185115
chr1	14285884
chr1	14295766
chr1	14592462
chr1	15603844
chr1	15604118
chr1	15604332
chr1	15604586
chr1	15604622
chr1	15604669
chr1	15604809
chr1	15605103
chr1	15605364
chr1	15605365
chr1	15605832
chr1	15606481
chr1	15606486
chr1	15606534
chr1	15606644
chr1	15606865
chr1	15607013
chr1	15607026
chr1	15607735
chr1	15633313
chr1	15651299
chr1	15651354
chr1	15651564
chr1	15651979
chr1	15651990
chr1	15652254
chr1	15652260
chr1	15725379
chr1	15725510
chr1	15726089
chr1	15726404
chr1	15726725
chr1	15726765
chr1	15727153
chr1	15727254
chr1	15727700
chr1	15891438
chr1	15891848
chr1	15892318
chr1	15892400
chr1	15892438
chr1	15892524
chr1	15892534
chr1	15892849
chr1	15893526
chr1	15893562
chr1	15893716
chr1	15894033
chr1	15894036
chr1	15894045
chr1	15894199
chr1	15894338
chr1	15894352
chr1	15895310
chr1	15895516
chr1	15895518
chr1	15895540
chr1	15895600
chr1	15895609
chr1	15895763
chr1	15895859
chr1	15896114
chr1	15896117
chr1	15896120
chr1	15896170
chr1	15896225
chr1	15896309
chr1	15896440
chr1	15896613
chr1	15896638
chr1	15896639
chr1	15896694
chr1	15896954
chr1	15897017
chr1	15897290
chr1	15897396
chr1	15897472
chr1	15897479
chr1	15897513
chr1	15897532
chr1	15897678
chr1	15897803
chr1	15897949
chr1	15898353
chr1	15898457
chr1	15898672
chr1	15898674
chr1	15898961
chr1	15899121
chr1	15899159
chr1	15899160
chr1	15899304
chr1	15928150
chr1	15928265
chr1	15929465
chr1	15930394
chr1	15930589
chr1	15931398
chr1	15932190
chr1	15932202
chr1	15932209
chr1	15932218
chr1	15932339
chr1	15932413
chr1	15932933
chr1	15933194
chr1	15933248
chr1	15933442
chr1	15933445
chr1	15933602
chr1	15933756
chr1	15934103
chr1	15934224
chr1	15934289
chr1	15934325
chr1	15934378
chr1	15934405
chr1	15934410
chr1	15934463
chr1	15934713
chr1	15935111
chr1	15935131
chr1	15935136
chr1	15935140
chr1	15936372
chr1	15937205
chr1	15937208
chr1	15937657
chr1	15937809
chr1	15938411
chr1	15938413
chr1	15938552
chr1	15938553
chr1	15938665
chr1	15938682
chr1	15938692
chr1	15938726
chr1	15938813
chr1	15938854
chr1	15938864
chr1	15938873
chr1	15938883
chr1	15973348
chr1	15973581
chr1	15974032
chr1	15974035
chr1	15974614
chr1	15974904
chr1	15975043
chr1	15976481
chr1	15976647
chr1	15977229
chr1	15977239
chr1	15977799
chr1	15977949
chr1	15978158
chr1	15979464
chr1	15979808
chr1	15989607
chr1	15989748
chr1	15991711
chr1	15992285
chr1	15992421
chr1	15993224
chr1	15993680
chr1	15996048
chr1	15997663
chr1	15997855
chr1	15997923
chr1	15998478
chr1	15998805
chr1	15998952
chr1	15999038
chr1	15999102
chr1	15999186
chr1	15999303
chr1	16070456
chr1	16071382
chr1	16071443
chr1	16071449
chr1	16071573
chr1	16071722
chr1	16072057
chr1	16072103
chr1	16072192
chr1	16072656
chr1	16073373
chr1	16073486
chr1	16073823
chr1	16073836
chr1	16073961
chr1	16074012
chr1	16127215
chr1	16127278
chr1	16127469
chr1	16129709
chr1	16131829
chr1	16136662
chr1	16136663
chr1	16136755
chr1	16137064
chr1	16137068
chr1	16137200
chr1	16162089
chr1	16162241
chr1	16162255
chr1	16162356
chr1	16163069
chr1	16163096
chr1	16228487
chr1	16228497
chr1	16228502
chr1	16229025
chr1	16229302
chr1	16231163
chr1	16264012
chr1	16264220
chr1	16264345
chr1	16264486
chr1	16264489
chr1	16267091
chr1	16267168
chr1	16267518
chr1	16268224
chr1	16268753
chr1	16268858
chr1	16268971
chr1	16275483
chr1	16275558
chr1	16275648
chr1	16276067
chr1	16276173
chr1	16276242
chr1	16276417
chr1	16276423
chr1	16276547
chr1	16277144
chr1	16277546
chr1	16277941
chr1	16309084
chr1	16309097
chr1	16309117
chr1	16309129
chr1	16309174
chr1	16309203
chr1	16309213
chr1	16309438
chr1	16309481
chr1	16309515
chr1	16309564
chr1	16309566
chr1	16309584
chr1	16309663
chr1	16309690
chr1	16309709
chr1	16309729
chr1	16309742
chr1	16309749
chr1	16309785
chr1	16309963
chr1	16309984
chr1	16310196
chr1	16310238
chr1	16310274
chr1	16310304
chr1	16310305
chr1	16310309
chr1	16310441
chr1	16310456
chr1	16310482
chr1	16310504
chr1	16310506
chr1	16310521
chr1	16310578
chr1	16310593
chr1	16310598
chr1	16310630
chr1	16365672
chr1	16365701
chr1	16365710
chr1	16365774
chr1	16365790
chr1	16365852
chr1	16366000
chr1	16366015
chr1	16366185
chr1	16366255
chr1	16398205
chr1	16398343
chr1	16398353
chr1	16398358
chr1	16398708
chr1	16399300
chr1	16399507
chr1	16399764
chr1	16399765
chr1	16410702
chr1	16410841
chr1	16410970
chr1	16410979
chr1	16411066
chr1	16411174
chr1	16411226
chr1	16411237
chr1	16411514
chr1	16413918
chr1	16425675
chr1	16425751
chr1	16425996
chr1	16426208
chr1	16426471
chr1	16427032
chr1	16427056
chr1	16427416
chr1	16428286
chr1	16428449
chr1	16428745
chr1	16429100
chr1	16429180
chr1	16429208
chr1	16429718
chr1	16429954
chr1	16468100
chr1	16468636
chr1	16469141
chr1	16469237
chr1	16469683
chr1	16469689
chr1	16470026
chr1	16470431
chr1	16470467
chr1	16470715
chr1	16471335
chr1	16479834
chr1	16480052
chr1	16480290
chr1	16481280
chr1	16483989
chr1	16484278
chr1	16484560
chr1	16484579
chr1	16484745
chr1	16485398
chr1	16485674
chr1	16485749
chr1	16485751
chr1	16485777
chr1	16485945
chr1	16485947
chr1	16486182
chr1	16486442
chr1	16486449
chr1	16486451
chr1	16486654
chr1	16487437
chr1	16487454
chr1	16488390
chr1	16489240
chr1	16489335
chr1	16489337
chr1	16489367
chr1	16489374
chr1	16489473
chr1	16489482
chr1	16489563
chr1	16489618
chr1	16489720
chr1	16489760
chr1	16489799
chr1	16489925
chr1	16489959
chr1	16490131
chr1	16490206
chr1	16490382
chr1	16490385
chr1	16490405
chr1	16490472
chr1	16490571
chr1	16490722
chr1	16490798
chr1	16490855
chr1	16491008
chr1	16491072
chr1	16491270
chr1	16491281
chr1	16537664
chr1	16537851
chr1	16537921
chr1	16538025
chr1	16538557
chr1	16538620
chr1	16538631
chr1	16538759
chr1	16538760
chr1	16538774
chr1	16541670
chr1	16541716
chr1	16541768
chr1	16541808
chr1	16542730
chr1	16542794
chr1	16542915
chr1	16542947
chr1	16542954
chr1	16543045
chr1	16543203
chr1	16548704
chr1	16548826
chr1	16548840
chr1	16548844
chr1	16549028
chr1	16549033
chr1	16549084
chr1	16549179
chr1	16549182
chr1	16549363
chr1	16549371
chr1	16549456
chr1	16549769
chr1	16549829
chr1	16549865
chr1	16550038
chr1	16550062
chr1	16550252
chr1	16550258
chr1	16550387
chr1	16617410
chr1	16618330
chr1	16618648
chr1	16619263
chr1	16619568
chr1	16620947
chr1	16620980
chr1	16621626
chr1	16623505
chr1	16623774
chr1	16623857
chr1	16624165
chr1	16638002
chr1	16638120
chr1	16638324
chr1	16638565
chr1	16639091
chr1	16639184
chr1	16639453
chr1	16639931
chr1	16640668
chr1	16640846
chr1	16641137
chr1	16641167
chr1	16641179
chr1	16641754
chr1	16642217
chr1	16642955
chr1	16642983
chr1	16642993
chr1	16643196
chr1	16647257
chr1	16647292
chr1	16647509
chr1	16647819
chr1	16647820
chr1	16647849
chr1	16647887
chr1	16647914
chr1	16647938
chr1	16647941
chr1	16647986
chr1	16648057
chr1	16648472
chr1	16648496
chr1	16648500
chr1	16648530
chr1	16648542
chr1	16648544
chr1	16654746
chr1	16654958
chr1	16655851
chr1	16687646
chr1	16687788
chr1	16688630
chr1	16688752
chr1	16689472
chr1	16703527
chr1	16704063
chr1	16704150
chr1	16704547
chr1	16704645
chr1	16704655
chr1	16704802
chr1	16704997
chr1	16705126
chr1	16705336
chr1	16705343
chr1	16705459
chr1	16705466
chr1	16705487
chr1	16705829
chr1	16708423
chr1	16708435
chr1	16708631
chr1	16708633
chr1	16764705
chr1	16764714
chr1	16764749
chr1	16764822
chr1	16764852
chr1	16765013
chr1	16765657
chr1	16767238
chr1	16767302
chr1	16780987
chr1	16781013
chr1	16781206
chr1	16781344
chr1	16781488
chr1	16781588
chr1	16782184
chr1	16782838
chr1	16782853
chr1	16783081
chr1	16783591
chr1	16783592
chr1	16783594
chr1	16783967
chr1	16784627
chr1	16784963
chr1	16785510
chr1	16785926
chr1	16786127
chr1	16786153
chr1	16786293
chr1	16786498
chr1	16786633
chr1	16797800
chr1	16797954
chr1	16798738
chr1	16799999
chr1	16800047
chr1	16834704
chr1	16834827
chr1	16835617
chr1	16836276
chr1	16837042
chr1	16837078
chr1	16837137
chr1	16837865
chr1	16838006
chr1	16838046
chr1	16838067
chr1	16849014
chr1	16849074
chr1	16849095
chr1	16849155
chr1	16849164
chr1	16849188
chr1	16849315
chr1	16849318
chr1	16849378
chr1	16849384
chr1	16849487
chr1	16849579
chr1	16849618
chr1	16849745
chr1	16849799
chr1	16849841
chr1	16849889
chr1	16850052
chr1	16850109
chr1	16850202
chr1	16850223
chr1	16850391
chr1	16850457
chr1	16871887
chr1	16872100
chr1	16872287
chr1	16872461
chr1	16872777
chr1	16872901
chr1	16875883
chr1	16885803
chr1	16885835
chr1	16886034
chr1	16886123
chr1	16886405
chr1	16886504
chr1	16886744
chr1	16887466
chr1	16887482
chr1	16887653
chr1	16887677
chr1	16887995
chr1	16888658
chr1	16888804
chr1	16889057
chr1	16895165
chr1	16895205
chr1	16908718
chr1	16908799
chr1	16908977
chr1	16908998
chr1	16909130
chr1	16909302
chr1	16909368
chr1	16910075
chr1	16910438
chr1	16910993
chr1	16912186
chr1	16912213
chr1	16912881
chr1	16912991
chr1	16913000
chr1	16914602
chr1	16923889
chr1	16925135
chr1	16925281
chr1	16925313
chr1	16925453
chr1	16926459
chr1	16926564
chr1	16926572
chr1	16926588
chr1	16926599
chr1	16926678
chr1	16927022
chr1	16928034
chr1	16928061
chr1	16940968
chr1	16941696
chr1	16941698
chr1	16941758
chr1	16942153
chr1	16942420
chr1	16963393
chr1	16963492
chr1	16963534
chr1	16963547
chr1	16963570
chr1	16963576
chr1	16964081
chr1	16970374
chr1	16970932
chr1	16973595
chr1	16976342
chr1	16976447
chr1	16976459
chr1	16976494
chr1	16976520
chr1	16977714
chr1	16979581
chr1	16979811
chr1	16980104
chr1	16980205
chr1	16980234
chr1	16980445
chr1	16980596
chr1	16981131
chr1	16981984
chr1	16982224
chr1	16982404
chr1	16982728
chr1	16982750
chr1	16982758
chr1	16983901
chr1	16991101
chr1	16991249
chr1	16991256
chr1	16995945
chr1	16999798
chr1	16999964
chr1	17000216
chr1	17000828
chr1	17009276
chr1	17009402
chr1	17009440
chr1	17009838
chr1	17010618
chr1	17010757
chr1	17010983
chr1	17011021
chr1	17011271
chr1	17011668
chr1	17011673
chr1	17011766
chr1	17032405
chr1	17033107
chr1	17053814
chr1	17053825
chr1	17054402
chr1	17054569
chr1	17055225
chr1	17055585
chr1	17055937
chr1	17056401
chr1	17056516
chr1	17056710
chr1	17056716
chr1	17057221
chr1	17057300
chr1	17057367
chr1	17057495
chr1	17058253
chr1	17058322
chr1	17058468
chr1	17058614
chr1	17058873
chr1	17059126
chr1	17059138
chr1	17059177
chr1	17059363
chr1	17059434
chr1	17079560
chr1	17080872
chr1	17081948
chr1	17082024
chr1	17084174
chr1	17084439
chr1	17084486
chr1	17084526
chr1	17084961
chr1	17085339
chr1	17085575
chr1	17085625
chr1	17086021
chr1	17086245
chr1	17087160
chr1	17087214
chr1	17087567
chr1	17087990
chr1	17088308
chr1	17088449
chr1	17088759
chr1	17089475
chr1	17090045
chr1	17090048
chr1	17090053
chr1	17090080
chr1	17090120
chr1	17090179
chr1	17090232
chr1	17090902
chr1	17091031
chr1	17091092
chr1	17091151
chr1	17091335
chr1	17096676
chr1	17097111
chr1	17097225
chr1	17098944
chr1	17099281
chr1	17099371
chr1	17099411
chr1	17099538
chr1	17099544
chr1	17099733
chr1	17099857
chr1	17099894
chr1	17099963
chr1	17099968
chr1	17100057
chr1	17100077
chr1	17100140
chr1	17100219
chr1	17100272
chr1	17100330
chr1	17100402
chr1	17100475
chr1	17100477
chr1	17100542
chr1	17100563
chr1	17101550
chr1	17148507
chr1	17150071
chr1	17150549
chr1	17153106
chr1	17154557
chr1	17155031
chr1	17155073
chr1	17155551
chr1	17155740
chr1	17157253
chr1	17159072
chr1	17159219
chr1	17159474
chr1	17159480
chr1	17161132
chr1	17162365
chr1	17162839
chr1	17163354
chr1	17163471
chr1	17164173
chr1	17164220
chr1	17164679
chr1	17165286
chr1	17165432
chr1	17165999
chr1	17167051
chr1	17167214
chr1	17169601
chr1	17169789
chr1	17170522
chr1	17170540
chr1	17170855
chr1	17171405
chr1	17172262
chr1	17173151
chr1	17176528
chr1	17176617
chr1	17176630
chr1	17179544
chr1	17179769
chr1	17180376
chr1	17180427
chr1	17180975
chr1	17182244
chr1	17182330
chr1	17192383
chr1	17192407
chr1	17199810
chr1	17199883
chr1	17214354
chr1	17214474
chr1	17214551
chr1	17253039
chr1	17253368
chr1	17253612
chr1	17253752
chr1	17253798
chr1	17253816
chr1	17253882
chr1	17266547
chr1	17276021
chr1	17276022
chr1	17276076
chr1	17276115
chr1	17276139
chr1	17276162
chr1	17276184
chr1	17276219
chr1	17276343
chr1	17276352
chr1	17276381
chr1	17276481
chr1	17276489
chr1	17276613
chr1	17276736
chr1	17276800
chr1	17276847
chr1	17276874
chr1	17276897
chr1	17276907
chr1	17276940
chr1	17276948
chr1	17276953
chr1	17277009
chr1	17277752
chr1	17283746
chr1	17284161
chr1	17284254
chr1	17284529
chr1	17285193
chr1	17285292
chr1	17285313
chr1	17292493
chr1	17292722
chr1	17292725
chr1	17292728
chr1	17292875
chr1	17295733
chr1	17295829
chr1	17296008
chr1	17296110
chr1	17296151
chr1	17296163
chr1	17296191
chr1	17298002
chr1	17298149
chr1	17298209
chr1	17298671
chr1	17301074
chr1	17301086
chr1	17301115
chr1	17301342
chr1	17301356
chr1	17302404
chr1	17302623
chr1	17302689
chr1	17302692
chr1	17302722
chr1	17302725
chr1	17302764
chr1	17302771
chr1	17302773
chr1	17305727
chr1	17307346
chr1	17308741
chr1	17308753
chr1	17308867
chr1	17310012
chr1	17311126
chr1	17311224
chr1	17313435
chr1	17313927
chr1	17314017
chr1	17314069
chr1	17319252
chr1	17319271
chr1	17319402
chr1	17319426
chr1	17319794
chr1	17320585
chr1	17320594
chr1	17320759
chr1	17321164
chr1	17321184
chr1	17321579
chr1	17321603
chr1	17322337
chr1	17322385
chr1	17322400
chr1	17324414
chr1	17324416
chr1	17324443
chr1	17324496
chr1	17324542
chr1	17324569
chr1	17324592
chr1	17324653
chr1	17324695
chr1	17324764
chr1	17324773
chr1	17324903
chr1	17324920
chr1	17326625
chr1	17326672
chr1	17326746
chr1	17326812
chr1	17327046
chr1	17327637
chr1	17328000
chr1	17328003
chr1	17328013
chr1	17328069
chr1	17328132
chr1	17328147
chr1	17328150
chr1	17328165
chr1	17328220
chr1	17328277
chr1	17328279
chr1	17328294
chr1	17328318
chr1	17328495
chr1	17328522
chr1	17331154
chr1	17331338
chr1	17335951
chr1	17336265
chr1	17338573
chr1	17340724
chr1	17342179
chr1	17342283
chr1	17342505
chr1	17342685
chr1	17342744
chr1	17342853
chr1	17342856
chr1	17342862
chr1	17342987
chr1	17343468
chr1	17343717
chr1	17343718
chr1	17343998
chr1	17344051
chr1	17346558
chr1	17351142
chr1	17351522
chr1	17351606
chr1	17351860
chr1	17351862
chr1	17352082
chr1	17352558
chr1	17352593
chr1	17352873
chr1	17352987
chr1	17353101
chr1	17353238
chr1	17353259
chr1	17353286
chr1	17353298
chr1	17353577
chr1	17353625
chr1	17353747
chr1	17353768
chr1	17353776
chr1	17354068
chr1	17354096
chr1	17354336
chr1	17354412
chr1	17354781
chr1	17356473
chr1	17372754
chr1	17372772
chr1	17375754
chr1	17375937
chr1	17383159
chr1	17383169
chr1	17385869
chr1	17385892
chr1	17395735
chr1	17395783
chr1	17396560
chr1	17396685
chr1	17396786
chr1	17424956
chr1	17426236
chr1	17426774
chr1	17427660
chr1	17432488
chr1	17433287
chr1	17433530
chr1	17433740
chr1	17433915
chr1	17434106
chr1	17434434
chr1	17434881
chr1	17434883
chr1	17434938
chr1	17435907
chr1	17435920
chr1	17435979
chr1	17437543
chr1	17438260
chr1	17439889
chr1	17440727
chr1	17440728
chr1	17441522
chr1	17441829
chr1	17441962
chr1	17443087
chr1	17443167
chr1	17443282
chr1	17443367
chr1	17443434
chr1	17443640
chr1	17443672
chr1	17443756
chr1	17443949
chr1	17444818
chr1	17445518
chr1	17445968
chr1	17446008
chr1	17446654
chr1	17447082
chr1	17451696
chr1	17451831
chr1	17451847
chr1	17451858
chr1	17451864
chr1	17452005
chr1	17452008
chr1	17452026
chr1	17452416
chr1	17452421
chr1	17452580
chr1	17452726
chr1	17452741
chr1	17452897
chr1	17452924
chr1	17452933
chr1	17452939
chr1	17452951
chr1	17453155
chr1	17453294
chr1	17453482
chr1	17453500
chr1	17453530
chr1	17453587
chr1	17453590
chr1	17453728
chr1	17453749
chr1	17453980
chr1	17456149
chr1	17457449
chr1	17457523
chr1	17457706
chr1	17460769
chr1	17463839
chr1	17464690
chr1	17464691
chr1	17464768
chr1	17465085
chr1	17465177
chr1	17465223
chr1	17466667
chr1	17467141
chr1	17467170
chr1	17468929
chr1	17472857
chr1	17474118
chr1	17474215
chr1	17474299
chr1	17474590
chr1	17474636
chr1	17474717
chr1	17475081
chr1	17475266
chr1	17475549
chr1	17475569
chr1	17477781
chr1	17477787
chr1	17477914
chr1	17478360
chr1	17478523
chr1	17479000
chr1	17479173
chr1	17479181
chr1	17479204
chr1	17479277
chr1	17479669
chr1	17480311
chr1	17480497
chr1	17480693
chr1	17480751
chr1	17480844
chr1	17480907
chr1	17480995
chr1	17481127
chr1	17481242
chr1	17481244
chr1	17481320
chr1	17481601
chr1	17481745
chr1	17481777
chr1	17482076
chr1	17482225
chr1	17482575
chr1	17482652
chr1	17482919
chr1	17482924
chr1	17483062
chr1	17483115
chr1	17483202
chr1	17486006
chr1	17537104
chr1	17558450
chr1	17558474
chr1	17558483
chr1	17558495
chr1	17558527
chr1	17558552
chr1	17558603
chr1	17558623
chr1	17558750
chr1	17558753
chr1	17558877
chr1	17558895
chr1	17558958
chr1	17558985
chr1	17559624
chr1	17559635
chr1	17559680
chr1	17559699
chr1	17559727
chr1	17559743
chr1	17559773
chr1	17559782
chr1	17560194
chr1	17560211
chr1	17561485
chr1	17561511
chr1	17561885
chr1	17562374
chr1	17569075
chr1	17569980
chr1	17570110
chr1	17581369
chr1	17582294
chr1	17582491
chr1	17582805
chr1	17582895
chr1	17583331
chr1	17584091
chr1	17585082
chr1	17585431
chr1	17585432
chr1	17586371
chr1	17587276
chr1	17588060
chr1	17588268
chr1	17588313
chr1	17588454
chr1	17588819
chr1	17588942
chr1	17589057
chr1	17589283
chr1	17589818
chr1	17589821
chr1	17590003
chr1	17590081
chr1	17590437
chr1	17590633
chr1	17590871
chr1	17591202
chr1	17606585
chr1	17612269
chr1	17612283
chr1	17612349
chr1	17612500
chr1	17612503
chr1	17612542
chr1	17613214
chr1	17613215
chr1	17613264
chr1	17613270
chr1	17613307
chr1	17613310
chr1	17613313
chr1	17613401
chr1	17613403
chr1	17614064
chr1	17614489
chr1	17614649
chr1	17614818
chr1	17637688
chr1	17647305
chr1	17647318
chr1	17647346
chr1	17647373
chr1	17647406
chr1	17647435
chr1	17647505
chr1	17647700
chr1	17647721
chr1	17647726
chr1	17648094
chr1	17648445
chr1	17660884
chr1	17660999
chr1	17661189
chr1	17661956
chr1	17662070
chr1	17662151
chr1	17662170
chr1	17662271
chr1	17662286
chr1	17662438
chr1	17662882
chr1	17663831
chr1	17663865
chr1	17676986
chr1	17677116
chr1	17677176
chr1	17677187
chr1	17677374
chr1	17677448
chr1	17677476
chr1	17677484
chr1	17677649
chr1	17677655
chr1	17678071
chr1	17678233
chr1	17678252
chr1	17678268
chr1	17678534
chr1	17678543
chr1	17678775
chr1	17678942
chr1	17679031
chr1	17679213
chr1	17679406
chr1	17679407
chr1	17679540
chr1	17679651
chr1	17680019
chr1	17680028
chr1	17680091
chr1	17680103
chr1	17680187
chr1	17680219
chr1	17680223
chr1	17680282
chr1	17680442
chr1	17680593
chr1	17680692
chr1	17680912
chr1	17681024
chr1	17681456
chr1	17681849
chr1	17682370
chr1	17682437
chr1	17682575
chr1	17682844
chr1	17682855
chr1	17683508
chr1	17683535
chr1	17683537
chr1	17683560
chr1	17683571
chr1	17687192
chr1	17687199
chr1	17687685
chr1	17688161
chr1	17691779
chr1	17691829
chr1	17691939
chr1	17692057
chr1	17692129
chr1	17692194
chr1	17692213
chr1	17692267
chr1	17692293
chr1	17692324
chr1	17692624
chr1	17692741
chr1	17692742
chr1	17692760
chr1	17692797
chr1	17692899
chr1	17692914
chr1	17693136
chr1	17693179
chr1	17693189
chr1	17693208
chr1	17693357
chr1	17693408
chr1	17693425
chr1	17693446
chr1	17693543
chr1	17693617
chr1	17693751
chr1	17693867
chr1	17693883
chr1	17695726
chr1	17695743
chr1	17695757
chr1	17695798
chr1	17708580
chr1	17717630
chr1	17720042
chr1	17720375
chr1	17720421
chr1	17720645
chr1	17721074
chr1	17724519
chr1	17724606
chr1	17726040
chr1	17726091
chr1	17726672
chr1	17732234
chr1	17732374
chr1	17732414
chr1	17732419
chr1	17734714
chr1	17738731
chr1	17739194
chr1	17739358
chr1	17739883
chr1	17740470
chr1	17740711
chr1	17742144
chr1	17743623
chr1	17748633
chr1	17750040
chr1	17751962
chr1	17753377
chr1	17753882
chr1	17757259
chr1	17770071
chr1	17770405
chr1	17770416
chr1	17770635
chr1	17770645
chr1	17770650
chr1	17771724
chr1	17772094
chr1	17772133
chr1	17772143
chr1	17772364
chr1	17772400
chr1	17772533
chr1	17772790
chr1	17772792
chr1	17772836
chr1	17772838
chr1	17772877
chr1	17773302
chr1	17773980
chr1	17773999
chr1	17776932
chr1	17778099
chr1	17778135
chr1	17780624
chr1	17780997
chr1	17781134
chr1	17781576
chr1	17781616
chr1	17781666
chr1	17781939
chr1	17782129
chr1	17782132
chr1	17782722
chr1	17782730
chr1	17782741
chr1	17783047
chr1	17783064
chr1	17783225
chr1	17783323
chr1	17783329
chr1	17783337
chr1	17783440
chr1	17783627
chr1	17783655
chr1	17783663
chr1	17783678
chr1	17783862
chr1	17783869
chr1	17786665
chr1	17787393
chr1	17788674
chr1	17789665
chr1	17789864
chr1	17789973
chr1	17790154
chr1	17790731
chr1	17790752
chr1	17790763
chr1	17791212
chr1	17791546
chr1	17792045
chr1	17792340
chr1	17792342
chr1	17795011
chr1	17796972
chr1	17797034
chr1	17797091
chr1	17797103
chr1	17798522
chr1	17798542
chr1	17799735
chr1	17799750
chr1	17799828
chr1	17799829
chr1	17800175
chr1	17800419
chr1	17800470
chr1	17800474
chr1	17800959
chr1	17801065
chr1	17801067
chr1	17801647
chr1	17801792
chr1	17801980
chr1	17802140
chr1	17806965
chr1	17807201
chr1	17807410
chr1	17807488
chr1	17807874
chr1	17808072
chr1	17808075
chr1	17808236
chr1	17808514
chr1	17808598
chr1	17808613
chr1	17808671
chr1	17808869
chr1	17808923
chr1	17809028
chr1	17809522
chr1	17809680
chr1	17810775
chr1	17810889
chr1	17811793
chr1	17825722
chr1	17828062
chr1	17828082
chr1	17828204
chr1	17828229
chr1	17828949
chr1	17829168
chr1	17830221
chr1	17835183
chr1	17835231
chr1	17835363
chr1	17835823
chr1	17835941
chr1	17837386
chr1	17837543
chr1	17837709
chr1	17837860
chr1	17837895
chr1	17840925
chr1	17842270
chr1	17846124
chr1	17846139
chr1	17846167
chr1	17846530
chr1	17846662
chr1	17847389
chr1	17847575
chr1	17848070
chr1	17848751
chr1	17850016
chr1	17850493
chr1	17851686
chr1	17851822
chr1	17853887
chr1	17853936
chr1	17855652
chr1	17855777
chr1	17855880
chr1	17864022
chr1	17867697
chr1	17867824
chr1	17867839
chr1	17867845
chr1	17867917
chr1	17867932
chr1	17868074
chr1	17868908
chr1	17869162
chr1	17869182
chr1	17869555
chr1	17870164
chr1	17870190
chr1	17870266
chr1	17870281
chr1	17871209
chr1	17871258
chr1	17871266
chr1	17871956
chr1	17872322
chr1	17872337
chr1	17874672
chr1	17874704
chr1	17876084
chr1	17876206
chr1	17876255
chr1	17876791
chr1	17877199
chr1	17877238
chr1	17877329
chr1	17877383
chr1	17877658
chr1	17877831
chr1	17877915
chr1	17878203
chr1	17878206
chr1	17878233
chr1	17878296
chr1	17878339
chr1	17878548
chr1	17878729
chr1	17878732
chr1	17878750
chr1	17878939
chr1	17878976
chr1	17879720
chr1	17880506
chr1	17880945
chr1	17882028
chr1	17882297
chr1	17882511
chr1	17882520
chr1	17883078
chr1	17883089
chr1	17883090
chr1	17883541
chr1	17883739
chr1	17883775
chr1	17886118
chr1	17886136
chr1	17886641
chr1	17887230
chr1	17887232
chr1	17888608
chr1	17889474
chr1	17891380
chr1	17891838
chr1	17892458
chr1	17896043
chr1	17896098
chr1	17896922
chr1	17897726
chr1	17897727
chr1	17898494
chr1	17898648
chr1	17902820
chr1	17903126
chr1	17904096
chr1	17904330
chr1	17905396
chr1	17905470
chr1	17906019
chr1	17907934
chr1	17907976
chr1	17908457
chr1	17908518
chr1	17908570
chr1	17908685
chr1	17909550
chr1	17909569
chr1	17909696
chr1	17911580
chr1	17912324
chr1	17912360
chr1	17913222
chr1	17913720
chr1	17913906
chr1	17914148
chr1	17914660
chr1	17914717
chr1	17914832
chr1	17922820
chr1	17923408
chr1	17924146
chr1	17925713
chr1	17926277
chr1	17926906
chr1	17927007
chr1	17927358
chr1	17928087
chr1	17928475
chr1	17932983
chr1	17933039
chr1	17933098
chr1	17933995
chr1	17940332
chr1	17940475
chr1	17940478
chr1	17940574
chr1	17942018
chr1	17942024
chr1	17942315
chr1	17942546
chr1	17943542
chr1	17943551
chr1	17943938
chr1	17944160
chr1	17945638
chr1	17945902
chr1	17945991
chr1	17946875
chr1	17946876
chr1	17947067
chr1	17947201
chr1	17947404
chr1	17947420
chr1	17948761
chr1	17949112
chr1	17950117
chr1	17950454
chr1	17950930
chr1	17951387
chr1	17952303
chr1	17953233
chr1	17953321
chr1	17954020
chr1	17954946
chr1	17955008
chr1	17955021
chr1	17956382
chr1	17956408
chr1	17956664
chr1	17958369
chr1	17958697
chr1	17959783
chr1	17960641
chr1	17961607
chr1	17961836
chr1	17961871
chr1	17971550
chr1	17971551
chr1	17973789
chr1	17973943
chr1	17974280
chr1	17974573
chr1	17975429
chr1	17975588
chr1	17976110
chr1	17984766
chr1	17985764
chr1	17985818
chr1	17989303
chr1	17990017
chr1	17994906
chr1	17995953
chr1	17996564
chr1	17996663
chr1	17997680
chr1	17998004
chr1	18011730
chr1	18011746
chr1	18011886
chr1	18012647
chr1	18023729
chr1	18025081
chr1	18025184
chr1	18025758
chr1	18030909
chr1	18037462
chr1	18037547
chr1	18037548
chr1	18038421
chr1	18039412
chr1	18039452
chr1	18041151
chr1	18041302
chr1	18043997
chr1	18044345
chr1	18044588
chr1	18045669
chr1	18060951
chr1	18063227
chr1	18063875
chr1	18063876
chr1	18065542
chr1	18066003
chr1	18066280
chr1	18066934
chr1	18067933
chr1	18068686
chr1	18072385
chr1	18072937
chr1	18074903
chr1	18078778
chr1	18080790
chr1	18080816
chr1	18080835
chr1	18080881
chr1	18080882
chr1	18081065
chr1	18081230
chr1	18081242
chr1	18081281
chr1	18081635
chr1	18081641
chr1	18081695
chr1	18081806
chr1	18082399
chr1	18082435
chr1	18082462
chr1	18085275
chr1	18086607
chr1	18087746
chr1	18098746
chr1	18098758
chr1	18099089
chr1	18099198
chr1	18099590
chr1	18099679
chr1	18099739
chr1	18099827
chr1	18099828
chr1	18100260
chr1	18100439
chr1	18100755
chr1	18101369
chr1	18107868
chr1	18108242
chr1	18108777
chr1	18109571
chr1	18109931
chr1	18110180
chr1	18112633
chr1	18113235
chr1	18113258
chr1	18113785
chr1	18113998
chr1	18114112
chr1	18114137
chr1	18114727
chr1	18114794
chr1	18117110
chr1	18117310
chr1	18117320
chr1	18117459
chr1	18117533
chr1	18121346
chr1	18121851
chr1	18121863
chr1	18122341
chr1	18122702
chr1	18123354
chr1	18123356
chr1	18123795
chr1	18138285
chr1	18138515
chr1	18138517
chr1	18138612
chr1	18138641
chr1	18138643
chr1	18138677
chr1	18138709
chr1	18138874
chr1	18138899
chr1	18138901
chr1	18139673
chr1	18139711
chr1	18139874
chr1	18139883
chr1	18140144
chr1	18140200
chr1	18140284
chr1	18140287
chr1	18140412
chr1	18140414
chr1	18141656
chr1	18141727
chr1	18144101
chr1	18150846
chr1	18151019
chr1	18151226
chr1	18152327
chr1	18176579
chr1	18176861
chr1	18176885
chr1	18176889
chr1	18177598
chr1	18178216
chr1	18179592
chr1	18180239
chr1	18181288
chr1	18183228
chr1	18183348
chr1	18183740
chr1	18184094
chr1	18186596
chr1	18218905
chr1	18235229
chr1	18236417
chr1	18236759
chr1	18247520
chr1	18247547
chr1	18253191
chr1	18253758
chr1	18253821
chr1	18254088
chr1	18255804
chr1	18255850
chr1	18256480
chr1	18261184
chr1	18265805
chr1	18265975
chr1	18266028
chr1	18266218
chr1	18267012
chr1	18267116
chr1	18267437
chr1	18268344
chr1	18269376
chr1	18271622
chr1	18271634
chr1	18276783
chr1	18276950
chr1	18279079
chr1	18279261
chr1	18279274
chr1	18279298
chr1	18279304
chr1	18279789
chr1	18279824
chr1	18279842
chr1	18279966
chr1	18279979
chr1	18280021
chr1	18280105
chr1	18280123
chr1	18280125
chr1	18280236
chr1	18280488
chr1	18280663
chr1	18280917
chr1	18280928
chr1	18280932
chr1	18283344
chr1	18283478
chr1	18283587
chr1	18283594
chr1	18284368
chr1	18284568
chr1	18284732
chr1	18284849
chr1	18284886
chr1	18284924
chr1	18284949
chr1	18285079
chr1	18285187
chr1	18285227
chr1	18285481
chr1	18285512
chr1	18285583
chr1	18285717
chr1	18285775
chr1	18285852
chr1	18285887
chr1	18286001
chr1	18286183
chr1	18286191
chr1	18286313
chr1	18286332
chr1	18286434
chr1	18286727
chr1	18286764
chr1	18313489
chr1	18314637
chr1	18314815
chr1	18316017
chr1	18317502
chr1	18318333
chr1	18318640
chr1	18322114
chr1	18322182
chr1	18327638
chr1	18327773
chr1	18327779
chr1	18327800
chr1	18327812
chr1	18327959
chr1	18328000
chr1	18328002
chr1	18328054
chr1	18328055
chr1	18328379
chr1	18328432
chr1	18328553
chr1	18330509
chr1	18330948
chr1	18331030
chr1	18331667
chr1	18332125
chr1	18332639
chr1	18332986
chr1	18333320
chr1	18333362
chr1	18333365
chr1	18333482
chr1	18333656
chr1	18333701
chr1	18333874
chr1	18333972
chr1	18334030
chr1	18334632
chr1	18335401
chr1	18335574
chr1	18335923
chr1	18342607
chr1	18343856
chr1	18351963
chr1	18353119
chr1	18353356
chr1	18353761
chr1	18354577
chr1	18354920
chr1	18355582
chr1	18358362
chr1	18359080
chr1	18360131
chr1	18361734
chr1	18361809
chr1	18361882
chr1	18362342
chr1	18362366
chr1	18365991
chr1	18366360
chr1	18368002
chr1	18368096
chr1	18368231
chr1	18370841
chr1	18371620
chr1	18371919
chr1	18377444
chr1	18377505
chr1	18377567
chr1	18377590
chr1	18377853
chr1	18377901
chr1	18377902
chr1	18377948
chr1	18378492
chr1	18378813
chr1	18378831
chr1	18378858
chr1	18378861
chr1	18378885
chr1	18378933
chr1	18378942
chr1	18379068
chr1	18379071
chr1	18379086
chr1	18379101
chr1	18379119
chr1	18379245
chr1	18379272
chr1	18379278
chr1	18379344
chr1	18379365
chr1	18379377
chr1	18379497
chr1	18379517
chr1	18379602
chr1	18379625
chr1	18381301
chr1	18381318
chr1	18381333
chr1	18381465
chr1	18382035
chr1	18382275
chr1	18382311
chr1	18382316
chr1	18382323
chr1	18382763
chr1	18382951
chr1	18383129
chr1	18383195
chr1	18383410
chr1	18383424
chr1	18383509
chr1	18383806
chr1	18383955
chr1	18383959
chr1	18384061
chr1	18384131
chr1	18384198
chr1	18384203
chr1	18384466
chr1	18385035
chr1	18385519
chr1	18385524
chr1	18385527
chr1	18385550
chr1	18385602
chr1	18391867
chr1	18391976
chr1	18392055
chr1	18392081
chr1	18392311
chr1	18393124
chr1	18393566
chr1	18400808
chr1	18400957
chr1	18402234
chr1	18402923
chr1	18404028
chr1	18404406
chr1	18404659
chr1	18408614
chr1	18408624
chr1	18408632
chr1	18408657
chr1	18408732
chr1	18408736
chr1	18408786
chr1	18408801
chr1	18408994
chr1	18409030
chr1	18409063
chr1	18409088
chr1	18409135
chr1	18409156
chr1	18416729
chr1	18416871
chr1	18417029
chr1	18417869
chr1	18418291
chr1	18419790
chr1	18429702
chr1	18430266
chr1	18443148
chr1	18443584
chr1	18443668
chr1	18443881
chr1	18443955
chr1	18444007
chr1	18444175
chr1	18444532
chr1	18444578
chr1	18444581
chr1	18444773
chr1	18444774
chr1	18444781
chr1	18444932
chr1	18447778
chr1	18447996
chr1	18448004
chr1	18448332
chr1	18448820
chr1	18452180
chr1	18452186
chr1	18452228
chr1	18452260
chr1	18452462
chr1	18452479
chr1	18452540
chr1	18452584
chr1	18452696
chr1	18453794
chr1	18454193
chr1	18454299
chr1	18455110
chr1	18455308
chr1	18455431
chr1	18455498
chr1	18455499
chr1	18455508
chr1	18455675
chr1	18455764
chr1	18456089
chr1	18456370
chr1	18464186
chr1	18464861
chr1	18464898
chr1	18465929
chr1	18470229
chr1	18488692
chr1	18488728
chr1	18488851
chr1	18489316
chr1	18489342
chr1	18489585
chr1	18489593
chr1	18489726
chr1	18489889
chr1	18491178
chr1	18491191
chr1	18491350
chr1	18491613
chr1	18491666
chr1	18492252
chr1	18492750
chr1	18494140
chr1	18494216
chr1	18494623
chr1	18494888
chr1	18494889
chr1	18495149
chr1	18495247
chr1	18495352
chr1	18495429
chr1	18495454
chr1	18495495
chr1	18495538
chr1	18495563
chr1	18495575
chr1	18495698
chr1	18495727
chr1	18495770
chr1	18495826
chr1	18495948
chr1	18496043
chr1	18496097
chr1	18496131
chr1	18496457
chr1	18496492
chr1	18496525
chr1	18496675
chr1	18497036
chr1	18497171
chr1	18501017
chr1	18501019
chr1	18502059
chr1	18502351
chr1	18503054
chr1	18503678
chr1	18504244
chr1	18504373
chr1	18504465
chr1	18505377
chr1	18508016
chr1	18508423
chr1	18508979
chr1	18509053
chr1	18509268
chr1	18509577
chr1	18509678
chr1	18509736
chr1	18509855
chr1	18509856
chr1	18509857
chr1	18510357
chr1	18510505
chr1	18510595
chr1	18510692
chr1	18510774
chr1	18511109
chr1	18511381
chr1	18511501
chr1	18511843
chr1	18512065
chr1	18512069
chr1	18512742
chr1	18512916
chr1	18512940
chr1	18512952
chr1	18512974
chr1	18512975
chr1	18513003
chr1	18513033
chr1	18513046
chr1	18513068
chr1	18513088
chr1	18513951
chr1	18515410
chr1	18515441
chr1	18515615
chr1	18515747
chr1	18515780
chr1	18516153
chr1	18516364
chr1	18516429
chr1	18516457
chr1	18516653
chr1	18517123
chr1	18518790
chr1	18519060
chr1	18519408
chr1	18520140
chr1	18520270
chr1	18520474
chr1	18520559
chr1	18520594
chr1	18520919
chr1	18520997
chr1	18521021
chr1	18521036
chr1	18521091
chr1	18521748
chr1	18522370
chr1	18523155
chr1	18523209
chr1	18527234
chr1	18528679
chr1	18533129
chr1	18542337
chr1	18542651
chr1	18542773
chr1	18543073
chr1	18558202
chr1	18558518
chr1	18559472
chr1	18562480
chr1	18562568
chr1	18563420
chr1	18564214
chr1	18565745
chr1	18569862
chr1	18569951
chr1	18569990
chr1	18570194
chr1	18570323
chr1	18570484
chr1	18570621
chr1	18570622
chr1	18571426
chr1	18571429
chr1	18571645
chr1	18571672
chr1	18571877
chr1	18571915
chr1	18572028
chr1	18572443
chr1	18572474
chr1	18572548
chr1	18573050
chr1	18573206
chr1	18573305
chr1	18573445
chr1	18573534
chr1	18573902
chr1	18574623
chr1	18575056
chr1	18575085
chr1	18575158
chr1	18575485
chr1	18575620
chr1	18575654
chr1	18575844
chr1	18577799
chr1	18577852
chr1	18577972
chr1	18578193
chr1	18578360
chr1	18578421
chr1	18582063
chr1	18582155
chr1	18582175
chr1	18582640
chr1	18582788
chr1	18583179
chr1	18583673
chr1	18583694
chr1	18591936
chr1	18592397
chr1	18593518
chr1	18593794
chr1	18593924
chr1	18594475
chr1	18594522
chr1	18594532
chr1	18611552
chr1	18614239
chr1	18616394
chr1	18618240
chr1	18619546
chr1	18621266
chr1	18622176
chr1	18622237
chr1	18622803
chr1	18623071
chr1	18623709
chr1	18624211
chr1	18627826
chr1	18627922
chr1	18629242
chr1	18649004
chr1	18650879
chr1	18651407
chr1	18651659
chr1	18652173
chr1	18653021
chr1	18653210
chr1	18653268
chr1	18653274
chr1	18653930
chr1	18654343
chr1	18654891
chr1	18655823
chr1	18655916
chr1	18656414
chr1	18657283
chr1	18657299
chr1	18659523
chr1	18661717
chr1	18664703
chr1	18665286
chr1	18666239
chr1	18669256
chr1	18669261
chr1	18676428
chr1	18678036
chr1	18678528
chr1	18678781
chr1	18679098
chr1	18679443
chr1	18679515
chr1	18679666
chr1	18682021
chr1	18682666
chr1	18682850
chr1	18685910
chr1	18686019
chr1	18686545
chr1	18686984
chr1	18687233
chr1	18687474
chr1	18687788
chr1	18693783
chr1	18694322
chr1	18694446
chr1	18696987
chr1	18697615
chr1	18703936
chr1	18704010
chr1	18704050
chr1	18706122
chr1	18706399
chr1	18709478
chr1	18709674
chr1	18710367
chr1	18710432
chr1	18713990
chr1	18715829
chr1	18715893
chr1	18716242
chr1	18716339
chr1	18716359
chr1	18716536
chr1	18717966
chr1	18718530
chr1	18719574
chr1	18720379
chr1	18720653
chr1	18721129
chr1	18726662
chr1	18726737
chr1	18726741
chr1	18726958
chr1	18726991
chr1	18727188
chr1	18727225
chr1	18727267
chr1	18727273
chr1	18727291
chr1	18727348
chr1	18727357
chr1	18727552
chr1	18727561
chr1	18727836
chr1	18727993
chr1	18728114
chr1	18728156
chr1	18728853
chr1	18729062
chr1	18729113
chr1	18729180
chr1	18729183
chr1	18729266
chr1	18729310
chr1	18729369
chr1	18729840
chr1	18729845
chr1	18730100
chr1	18730179
chr1	18731379
chr1	18731393
chr1	18737380
chr1	18737396
chr1	18737527
chr1	18737551
chr1	18737593
chr1	18737611
chr1	18737620
chr1	18737914
chr1	18737953
chr1	18738046
chr1	18738055
chr1	18738100
chr1	18738244
chr1	18738304
chr1	18738307
chr1	18738325
chr1	18738355
chr1	18738394
chr1	18738430
chr1	18738442
chr1	18738481
chr1	18738599
chr1	18738685
chr1	18738715
chr1	18738718
chr1	18738850
chr1	18739073
chr1	18739355
chr1	18739376
chr1	18739377
chr1	18739378
chr1	18748499
chr1	18750730
chr1	18757479
chr1	18757559
chr1	18757803
chr1	18757845
chr1	18757908
chr1	18758001
chr1	18758246
chr1	18758284
chr1	18758329
chr1	18771353
chr1	18771640
chr1	18772128
chr1	18772395
chr1	18772783
chr1	18773398
chr1	18773671
chr1	18773875
chr1	18774530
chr1	18774881
chr1	18775669
chr1	18775984
chr1	18776215
chr1	18776301
chr1	18776423
chr1	18776690
chr1	18782879
chr1	18783030
chr1	18783254
chr1	18783281
chr1	18783582
chr1	18783607
chr1	18783858
chr1	18783926
chr1	18783946
chr1	18784379
chr1	18784422
chr1	18787650
chr1	18789275
chr1	18789715
chr1	18795469
chr1	18795771
chr1	18796416
chr1	18796508
chr1	18796633
chr1	18796700
chr1	18796821
chr1	18797018
chr1	18798176
chr1	18798327
chr1	18799610
chr1	18800404
chr1	18800455
chr1	18800598
chr1	18801031
chr1	18801411
chr1	18801445
chr1	18806671
chr1	18806879
chr1	18808099
chr1	18809131
chr1	18809342
chr1	18810141
chr1	18810577
chr1	18811131
chr1	18811159
chr1	18813695
chr1	18813979
chr1	18814919
chr1	18814924
chr1	18820119
chr1	18821497
chr1	18823047
chr1	18823860
chr1	18824090
chr1	18824136
chr1	18824177
chr1	18824249
chr1	18824257
chr1	18824740
chr1	18824774
chr1	18824794
chr1	18825046
chr1	18825109
chr1	18825217
chr1	18825259
chr1	18825329
chr1	18825689
chr1	18825690
chr1	18825748
chr1	18825817
chr1	18825915
chr1	18826203
chr1	18826267
chr1	18826342
chr1	18826400
chr1	18839356
chr1	18839359
chr1	18839864
chr1	18839979
chr1	18840027
chr1	18840153
chr1	18840172
chr1	18840183
chr1	18840263
chr1	18840303
chr1	18840324
chr1	18840645
chr1	18842175
chr1	18843227
chr1	18844131
chr1	18844506
chr1	18863957
chr1	18865823
chr1	18866301
chr1	18866921
chr1	18867188
chr1	18867356
chr1	18867969
chr1	18868540
chr1	18869512
chr1	18869762
chr1	18870434
chr1	18870436
chr1	18871046
chr1	18871160
chr1	18871361
chr1	18871658
chr1	18871758
chr1	18872610
chr1	18872790
chr1	18872837
chr1	18872858
chr1	18878911
chr1	18879103
chr1	18879864
chr1	18880420
chr1	18881703
chr1	18882282
chr1	18882627
chr1	18882812
chr1	18883087
chr1	18883298
chr1	18883317
chr1	18883538
chr1	18883544
chr1	18883583
chr1	18883612
chr1	18884094
chr1	18884180
chr1	18896355
chr1	18896708
chr1	18897086
chr1	18900169
chr1	18925100
chr1	18927133
chr1	18927540
chr1	18929202
chr1	18930167
chr1	18930448
chr1	18930451
chr1	18930585
chr1	18930600
chr1	18930790
chr1	18933051
chr1	18933188
chr1	18939462
chr1	18939711
chr1	18941342
chr1	18944570
chr1	18944600
chr1	18944672
chr1	18944760
chr1	18945401
chr1	18945464
chr1	18945644
chr1	18945651
chr1	18949772
chr1	18950726
chr1	18950801
chr1	18950907
chr1	18953928
chr1	18953951
chr1	18954497
chr1	18954796
chr1	18985357
chr1	18985866
chr1	18986116
chr1	19019093
chr1	19019116
chr1	19019161
chr1	19019168
chr1	19019171
chr1	19019206
chr1	19019301
chr1	19019347
chr1	19019440
chr1	19019445
chr1	19019485
chr1	19019601
chr1	19019688
chr1	19019743
chr1	19019817
chr1	19019836
chr1	19020153
chr1	19020160
chr1	19020224
chr1	19020227
chr1	19020739
chr1	19020750
chr1	19020934
chr1	19021252
chr1	19021415
chr1	19021478
chr1	19021566
chr1	19021586
chr1	19021696
chr1	19035789
chr1	19036815
chr1	19037909
chr1	19038811
chr1	19038959
chr1	19039015
chr1	19041499
chr1	19041548
chr1	19044695
chr1	19045333
chr1	19045441
chr1	19045599
chr1	19046384
chr1	19046615
chr1	19047007
chr1	19047298
chr1	19047385
chr1	19048888
chr1	19049015
chr1	19049091
chr1	19049092
chr1	19049518
chr1	19049605
chr1	19049916
chr1	19049972
chr1	19049995
chr1	19050055
chr1	19050100
chr1	19050436
chr1	19050509
chr1	19050510
chr1	19050785
chr1	19050806
chr1	19050860
chr1	19050875
chr1	19051319
chr1	19051355
chr1	19051435
chr1	19051455
chr1	19051485
chr1	19051494
chr1	19051513
chr1	19051545
chr1	19051861
chr1	19052168
chr1	19052188
chr1	19052457
chr1	19058851
chr1	19074604
chr1	19074804
chr1	19075681
chr1	19076458
chr1	19097913
chr1	19097953
chr1	19098042
chr1	19098150
chr1	19098183
chr1	19098234
chr1	19098273
chr1	19098282
chr1	19098318
chr1	19098431
chr1	19098700
chr1	19099379
chr1	19099614
chr1	19099908
chr1	19099974
chr1	19100025
chr1	19100270
chr1	19100838
chr1	19102848
chr1	19103321
chr1	19106859
chr1	19106868
chr1	19107029
chr1	19107030
chr1	19107098
chr1	19107454
chr1	19108455
chr1	19108514
chr1	19108531
chr1	19109009
chr1	19109104
chr1	19109503
chr1	19109768
chr1	19109834
chr1	19110078
chr1	19110244
chr1	19110691
chr1	19110782
chr1	19111160
chr1	19111266
chr1	19111393
chr1	19112612
chr1	19112630
chr1	19113917
chr1	19114255
chr1	19114878
chr1	19115191
chr1	19116211
chr1	19118591
chr1	19119116
chr1	19121789
chr1	19121836
chr1	19122634
chr1	19122642
chr1	19122646
chr1	19122889
chr1	19123048
chr1	19123066
chr1	19123069
chr1	19123204
chr1	19123210
chr1	19123969
chr1	19124416
chr1	19124455
chr1	19124596
chr1	19124602
chr1	19124656
chr1	19124851
chr1	19125692
chr1	19125895
chr1	19126047
chr1	19126810
chr1	19127242
chr1	19127254
chr1	19127668
chr1	19128063
chr1	19128549
chr1	19128589
chr1	19130449
chr1	19130733
chr1	19132144
chr1	19132554
chr1	19133798
chr1	19134625
chr1	19134680
chr1	19135255
chr1	19135269
chr1	19135293
chr1	19135306
chr1	19136500
chr1	19136966
chr1	19138821
chr1	19139839
chr1	19140888
chr1	19141603
chr1	19141819
chr1	19142042
chr1	19142781
chr1	19142888
chr1	19143053
chr1	19143074
chr1	19143321
chr1	19143583
chr1	19144141
chr1	19150239
chr1	19150597
chr1	19153686
chr1	19153812
chr1	19154727
chr1	19154823
chr1	19159817
chr1	19160013
chr1	19160034
chr1	19160547
chr1	19160586
chr1	19161501
chr1	19165097
chr1	19166080
chr1	19166092
chr1	19167865
chr1	19167871
chr1	19174820
chr1	19177333
chr1	19177637
chr1	19181220
chr1	19181652
chr1	19182829
chr1	19182888
chr1	19184741
chr1	19184782
chr1	19189001
chr1	19189110
chr1	19189113
chr1	19189128
chr1	19189306
chr1	19189565
chr1	19189583
chr1	19190021
chr1	19190028
chr1	19190086
chr1	19190114
chr1	19190393
chr1	19190579
chr1	19190849
chr1	19191676
chr1	19191687
chr1	19192358
chr1	19192412
chr1	19192585
chr1	19192651
chr1	19192682
chr1	19192704
chr1	19192725
chr1	19192847
chr1	19192985
chr1	19192994
chr1	19193000
chr1	19193123
chr1	19193162
chr1	19193165
chr1	19193294
chr1	19193306
chr1	19193398
chr1	19193645
chr1	19193732
chr1	19193828
chr1	19193921
chr1	19193933
chr1	19194010
chr1	19194029
chr1	19194077
chr1	19194163
chr1	19194181
chr1	19194455
chr1	19194848
chr1	19200225
chr1	19200270
chr1	19200273
chr1	19200376
chr1	19200378
chr1	19200573
chr1	19200861
chr1	19200894
chr1	19201411
chr1	19294348
chr1	19296045
chr1	19296083
chr1	19296155
chr1	19296387
chr1	19296588
chr1	19297009
chr1	19297018
chr1	19297129
chr1	19297229
chr1	19297254
chr1	19297268
chr1	19297477
chr1	19297478
chr1	19297552
chr1	19298429
chr1	19298438
chr1	19298441
chr1	19298582
chr1	19298661
chr1	19298837
chr1	19298849
chr1	19298897
chr1	19298898
chr1	19298925
chr1	19299140
chr1	19305810
chr1	19305843
chr1	19306260
chr1	19306287
chr1	19306320
chr1	19306355
chr1	19311854
chr1	19312144
chr1	19312145
chr1	19312180
chr1	19312714
chr1	19312918
chr1	19312951
chr1	19312995
chr1	19313729
chr1	19313852
chr1	19314077
chr1	19314131
chr1	19323454
chr1	19323515
chr1	19323519
chr1	19323782
chr1	19323789
chr1	19324089
chr1	19324386
chr1	19324458
chr1	19324459
chr1	19324920
chr1	19325145
chr1	19325304
chr1	19326037
chr1	19326064
chr1	19326314
chr1	19326345
chr1	19326364
chr1	19326367
chr1	19369238
chr1	19369782
chr1	19369805
chr1	19369826
chr1	19369905
chr1	19370060
chr1	19370175
chr1	19370198
chr1	19370276
chr1	19370310
chr1	19370377
chr1	19370496
chr1	19370523
chr1	19370769
chr1	19370784
chr1	19370876
chr1	19370880
chr1	19370924
chr1	19370964
chr1	19370967
chr1	19371053
chr1	19418793
chr1	19420880
chr1	19420884
chr1	19420885
chr1	19421151
chr1	19421288
chr1	19421396
chr1	19422691
chr1	19424184
chr1	19424235
chr1	19442859
chr1	19442886
chr1	19459281
chr1	19459282
chr1	19460689
chr1	19460824
chr1	19460840
chr1	19461176
chr1	19462732
chr1	19478555
chr1	19479693
chr1	19480357
chr1	19484628
chr1	19492223
chr1	19492264
chr1	19492277
chr1	19492319
chr1	19492394
chr1	19492479
chr1	19492662
chr1	19492723
chr1	19499535
chr1	19500392
chr1	19501866
chr1	19502031
chr1	19502409
chr1	19505643
chr1	19505916
chr1	19506093
chr1	19506517
chr1	19506655
chr1	19507193
chr1	19507528
chr1	19507569
chr1	19508235
chr1	19508608
chr1	19508989
chr1	19509334
chr1	19510376
chr1	19510469
chr1	19511218
chr1	19527912
chr1	19529032
chr1	19530409
chr1	19530868
chr1	19530968
chr1	19531597
chr1	19534348
chr1	19535609
chr1	19545254
chr1	19560105
chr1	19561646
chr1	19562103
chr1	19562735
chr1	19562985
chr1	19564432
chr1	19564466
chr1	19565003
chr1	19565054
chr1	19566030
chr1	19566152
chr1	19567130
chr1	19567903
chr1	19569209
chr1	19569815
chr1	19570178
chr1	19570489
chr1	19573024
chr1	19573071
chr1	19573073
chr1	19573075
chr1	19573194
chr1	19573780
chr1	19573829
chr1	19573839
chr1	19573844
chr1	19573858
chr1	19573886
chr1	19573887
chr1	19573900
chr1	19574781
chr1	19574884
chr1	19574902
chr1	19574948
chr1	19574966
chr1	19574990
chr1	19575017
chr1	19575019
chr1	19575038
chr1	19575095
chr1	19575113
chr1	19575152
chr1	19575542
chr1	19575689
chr1	19580416
chr1	19580868
chr1	19584168
chr1	19584219
chr1	19584426
chr1	19584575
chr1	19584689
chr1	19584779
chr1	19584806
chr1	19584809
chr1	19585232
chr1	19585256
chr1	19585394
chr1	19585571
chr1	19585583
chr1	19586168
chr1	19586216
chr1	19586507
chr1	19587375
chr1	19587702
chr1	19587828
chr1	19588185
chr1	19588359
chr1	19588597
chr1	19589023
chr1	19589055
chr1	19589443
chr1	19589589
chr1	19589628
chr1	19589633
chr1	19590162
chr1	19590491
chr1	19591425
chr1	19591563
chr1	19591585
chr1	19591651
chr1	19591672
chr1	19591883
chr1	19591963
chr1	19592514
chr1	19603312
chr1	19603318
chr1	19603333
chr1	19603908
chr1	19604028
chr1	19604055
chr1	19604145
chr1	19604157
chr1	19604220
chr1	19604226
chr1	19604259
chr1	19604272
chr1	19604324
chr1	19604388
chr1	19604394
chr1	19604495
chr1	19604700
chr1	19604797
chr1	19604868
chr1	19604888
chr1	19604889
chr1	19604943
chr1	19605078
chr1	19605237
chr1	19605498
chr1	19605510
chr1	19606137
chr1	19606207
chr1	19606362
chr1	19607120
chr1	19607149
chr1	19607359
chr1	19607360
chr1	19607499
chr1	19607815
chr1	19607981
chr1	19608015
chr1	19608470
chr1	19608600
chr1	19609064
chr1	19609109
chr1	19609139
chr1	19609223
chr1	19609226
chr1	19609262
chr1	19609397
chr1	19609418
chr1	19609460
chr1	19609484
chr1	19609601
chr1	19609644
chr1	19609682
chr1	19609715
chr1	19609772
chr1	19609872
chr1	19609949
chr1	19610039
chr1	19610084
chr1	19610133
chr1	19610135
chr1	19610162
chr1	19610894
chr1	19610895
chr1	19610903
chr1	19611156
chr1	19611233
chr1	19611275
chr1	19611394
chr1	19611427
chr1	19611485
chr1	19611541
chr1	19611557
chr1	19611593
chr1	19611633
chr1	19611731
chr1	19611758
chr1	19611850
chr1	19612320
chr1	19612347
chr1	19612370
chr1	19612409
chr1	19617523
chr1	19619803
chr1	19619804
chr1	19619830
chr1	19619837
chr1	19619872
chr1	19619932
chr1	19619993
chr1	19620570
chr1	19620784
chr1	19620837
chr1	19638441
chr1	19639293
chr1	19639527
chr1	19639581
chr1	19639612
chr1	19639987
chr1	19640112
chr1	19641103
chr1	19641166
chr1	19641234
chr1	19641520
chr1	19641677
chr1	19642543
chr1	19642649
chr1	19642723
chr1	19642804
chr1	19642901
chr1	19642913
chr1	19643305
chr1	19643322
chr1	19643819
chr1	19644557
chr1	19644558
chr1	19646236
chr1	19651646
chr1	19651755
chr1	19652215
chr1	19652510
chr1	19653809
chr1	19658897
chr1	19658944
chr1	19659309
chr1	19659836
chr1	19659863
chr1	19661096
chr1	19661360
chr1	19661568
chr1	19661569
chr1	19661640
chr1	19661719
chr1	19662123
chr1	19662392
chr1	19663215
chr1	19663224
chr1	19669116
chr1	19669225
chr1	19669254
chr1	19669378
chr1	19669581
chr1	19669867
chr1	19670814
chr1	19684407
chr1	19686777
chr1	19689171
chr1	19689260
chr1	19689286
chr1	19689938
chr1	19690326
chr1	19697080
chr1	19697136
chr1	19697151
chr1	19697155
chr1	19697196
chr1	19697200
chr1	19697256
chr1	19697880
chr1	19709358
chr1	19711828
chr1	19712064
chr1	19712712
chr1	19720634
chr1	19725990
chr1	19726896
chr1	19727354
chr1	19727732
chr1	19727870
chr1	19727871
chr1	19728161
chr1	19730439
chr1	19730465
chr1	19734167
chr1	19737514
chr1	19737666
chr1	19738250
chr1	19738259
chr1	19738268
chr1	19738298
chr1	19738355
chr1	19738403
chr1	19738569
chr1	19738581
chr1	19738698
chr1	19738701
chr1	19739001
chr1	19739007
chr1	19739025
chr1	19739143
chr1	19739149
chr1	19739464
chr1	19739470
chr1	19739634
chr1	19739692
chr1	19739704
chr1	19740144
chr1	19740213
chr1	19740536
chr1	19740607
chr1	19740628
chr1	19745381
chr1	19745557
chr1	19745578
chr1	19745581
chr1	19745745
chr1	19746038
chr1	19746422
chr1	19751552
chr1	19751579
chr1	19751808
chr1	19756980
chr1	19757252
chr1	19757260
chr1	19757570
chr1	19758179
chr1	19758991
chr1	19759236
chr1	19760326
chr1	19760664
chr1	19761206
chr1	19761792
chr1	19762439
chr1	19764459
chr1	19764805
chr1	19775112
chr1	19781696
chr1	19782182
chr1	19784099
chr1	19785875
chr1	19785904
chr1	19790595
chr1	19790846
chr1	19792300
chr1	19792415
chr1	19793158
chr1	19793582
chr1	19794618
chr1	19794628
chr1	19809640
chr1	19813942
chr1	19813947
chr1	19814371
chr1	19814376
chr1	19814588
chr1	19815507
chr1	19815726
chr1	19816005
chr1	19816012
chr1	19816257
chr1	19816453
chr1	19816628
chr1	19817156
chr1	19817332
chr1	19817432
chr1	19817481
chr1	19817525
chr1	19817655
chr1	19817672
chr1	19817841
chr1	19818097
chr1	19818112
chr1	19818118
chr1	19818315
chr1	19818336
chr1	19818339
chr1	19818475
chr1	19818737
chr1	19818988
chr1	19819024
chr1	19819029
chr1	19819033
chr1	19819239
chr1	19819270
chr1	19821399
chr1	19821582
chr1	19821687
chr1	19821699
chr1	19821769
chr1	19821854
chr1	19821860
chr1	19821935
chr1	19822031
chr1	19822046
chr1	19822067
chr1	19822074
chr1	19822083
chr1	19822117
chr1	19822153
chr1	19822163
chr1	19822333
chr1	19824434
chr1	19824437
chr1	19824463
chr1	19831835
chr1	19831883
chr1	19832070
chr1	19832184
chr1	19832223
chr1	19840013
chr1	19840178
chr1	19840825
chr1	19841584
chr1	19844680
chr1	19849851
chr1	19854651
chr1	19855250
chr1	19855380
chr1	19856022
chr1	19856239
chr1	19856381
chr1	19856530
chr1	19856845
chr1	19858001
chr1	19858026
chr1	19858518
chr1	19858598
chr1	19858722
chr1	19858961
chr1	19859141
chr1	19859383
chr1	19859456
chr1	19859524
chr1	19859553
chr1	19859734
chr1	19859738
chr1	19860758
chr1	19863075
chr1	19864987
chr1	19865436
chr1	19865437
chr1	19865655
chr1	19866173
chr1	19867090
chr1	19867201
chr1	19867224
chr1	19867254
chr1	19867259
chr1	19871475
chr1	19871505
chr1	19871541
chr1	19873306
chr1	19873343
chr1	19880118
chr1	19880424
chr1	19880760
chr1	19880781
chr1	19880796
chr1	19880886
chr1	19881068
chr1	19881213
chr1	19881245
chr1	19881509
chr1	19881548
chr1	19881596
chr1	19881884
chr1	19881894
chr1	19882102
chr1	19882589
chr1	19884164
chr1	19885252
chr1	19885630
chr1	19886676
chr1	19891064
chr1	19891398
chr1	19892491
chr1	19896242
chr1	19897018
chr1	19897019
chr1	19897693
chr1	19897735
chr1	19897780
chr1	19902750
chr1	19904039
chr1	19904180
chr1	19905400
chr1	19905458
chr1	19905573
chr1	19906045
chr1	19906046
chr1	19906274
chr1	19906649
chr1	19913575
chr1	19914649
chr1	19916006
chr1	19921013
chr1	19921887
chr1	19923141
chr1	19924871
chr1	19924978
chr1	19925540
chr1	19937305
chr1	19937570
chr1	19940006
chr1	19940579
chr1	19940827
chr1	19950425
chr1	19951424
chr1	19951475
chr1	19951632
chr1	19951872
chr1	19951877
chr1	19951893
chr1	19951992
chr1	19952015
chr1	19952028
chr1	19952061
chr1	19952082
chr1	19952212
chr1	19952250
chr1	19952425
chr1	19952663
chr1	19953436
chr1	19953441
chr1	19953573
chr1	19953594
chr1	19953679
chr1	19953693
chr1	19953695
chr1	19953741
chr1	19953915
chr1	19954176
chr1	19954202
chr1	19954362
chr1	19954618
chr1	19954654
chr1	19954711
chr1	19954713
chr1	19954750
chr1	19955027
chr1	19955922
chr1	19956063
chr1	19956108
chr1	19956146
chr1	19956215
chr1	19956216
chr1	19956225
chr1	19956273
chr1	19956302
chr1	19956398
chr1	19956534
chr1	19959600
chr1	19961063
chr1	19963152
chr1	19963171
chr1	19963290
chr1	19963300
chr1	19963403
chr1	19963414
chr1	19963423
chr1	19963453
chr1	19963644
chr1	19963646
chr1	19963688
chr1	19963692
chr1	19963741
chr1	19963857
chr1	19963946
chr1	19964061
chr1	19964245
chr1	19964647
chr1	19964949
chr1	19966525
chr1	19966592
chr1	19967100
chr1	19967288
chr1	19968010
chr1	19968164
chr1	19968862
chr1	19969244
chr1	19970023
chr1	19970064
chr1	19971363
chr1	19971999
chr1	19972480
chr1	19974054
chr1	19974121
chr1	19974351
chr1	19978303
chr1	19980026
chr1	19980634
chr1	19981598
chr1	19981660
chr1	19981706
chr1	19981715
chr1	19984952
chr1	19985756
chr1	19987376
chr1	19987675
chr1	19987681
chr1	19987684
chr1	19987993
chr1	19989116
chr1	19989175
chr1	19989439
chr1	19990267
chr1	19990848
chr1	19990946
chr1	19991036
chr1	19991524
chr1	19991667
chr1	19991908
chr1	19992065
chr1	19992335
chr1	19992370
chr1	19992491
chr1	19992734
chr1	19993174
chr1	19993185
chr1	19993228
chr1	19993233
chr1	19996474
chr1	19996564
chr1	19998148
chr1	20000076
chr1	20001503
chr1	20001756
chr1	20003203
chr1	20003271
chr1	20014699
chr1	20027196
chr1	20028353
chr1	20028627
chr1	20029115
chr1	20031267
chr1	20031407
chr1	20033324
chr1	20036913
chr1	20037082
chr1	20037798
chr1	20037828
chr1	20038305
chr1	20042478
chr1	20042758
chr1	20055398
chr1	20057503
chr1	20057994
chr1	20058600
chr1	20058634
chr1	20059498
chr1	20062413
chr1	20063747
chr1	20065245
chr1	20066380
chr1	20066385
chr1	20067218
chr1	20067867
chr1	20068339
chr1	20069124
chr1	20069136
chr1	20069285
chr1	20069426
chr1	20069613
chr1	20070128
chr1	20070370
chr1	20070952
chr1	20071040
chr1	20071552
chr1	20071880
chr1	20072279
chr1	20072956
chr1	20073404
chr1	20073505
chr1	20074346
chr1	20074913
chr1	20075490
chr1	20076216
chr1	20077139
chr1	20077443
chr1	20077656
chr1	20077954
chr1	20078615
chr1	20078847
chr1	20079550
chr1	20079746
chr1	20080225
chr1	20080393
chr1	20081027
chr1	20081400
chr1	20081743
chr1	20083002
chr1	20083057
chr1	20083548
chr1	20083762
chr1	20084012
chr1	20084039
chr1	20084059
chr1	20084101
chr1	20098693
chr1	20098742
chr1	20098864
chr1	20099805
chr1	20100070
chr1	20100304
chr1	20100310
chr1	20100311
chr1	20100382
chr1	20100388
chr1	20100442
chr1	20100463
chr1	20100508
chr1	20100576
chr1	20100669
chr1	20103539
chr1	20103610
chr1	20103994
chr1	20104001
chr1	20104751
chr1	20105016
chr1	20105707
chr1	20105717
chr1	20105804
chr1	20105976
chr1	20106821
chr1	20106867
chr1	20108304
chr1	20108333
chr1	20108505
chr1	20108553
chr1	20108616
chr1	20109036
chr1	20109093
chr1	20109147
chr1	20109150
chr1	20109360
chr1	20135684
chr1	20135703
chr1	20135840
chr1	20136057
chr1	20154469
chr1	20154839
chr1	20155295
chr1	20156323
chr1	20159574
chr1	20160641
chr1	20167810
chr1	20167818
chr1	20167840
chr1	20167855
chr1	20167930
chr1	20167972
chr1	20168542
chr1	20168643
chr1	20168903
chr1	20168944
chr1	20168956
chr1	20168959
chr1	20169035
chr1	20169041
chr1	20169153
chr1	20169206
chr1	20169404
chr1	20169422
chr1	20169541
chr1	20179424
chr1	20179724
chr1	20179885
chr1	20180080
chr1	20180989
chr1	20185045
chr1	20185290
chr1	20186771
chr1	20189778
chr1	20189781
chr1	20189928
chr1	20189994
chr1	20190087
chr1	20190297
chr1	20190366
chr1	20190408
chr1	20190426
chr1	20190567
chr1	20190612
chr1	20190659
chr1	20190810
chr1	20190819
chr1	20190855
chr1	20190919
chr1	20190954
chr1	20190987
chr1	20191008
chr1	20191104
chr1	20191293
chr1	20191389
chr1	20191395
chr1	20191429
chr1	20191461
chr1	20191465
chr1	20191471
chr1	20191506
chr1	20191509
chr1	20191548
chr1	20191596
chr1	20191831
chr1	20195431
chr1	20195965
chr1	20195973
chr1	20196191
chr1	20196234
chr1	20196532
chr1	20196631
chr1	20196655
chr1	20196710
chr1	20196859
chr1	20197251
chr1	20197410
chr1	20197416
chr1	20197594
chr1	20197609
chr1	20198937
chr1	20199548
chr1	20199583
chr1	20199654
chr1	20199698
chr1	20199756
chr1	20200435
chr1	20201464
chr1	20201946
chr1	20202075
chr1	20203290
chr1	20203541
chr1	20211396
chr1	20211964
chr1	20212489
chr1	20213008
chr1	20215513
chr1	20215993
chr1	20216964
chr1	20219243
chr1	20221082
chr1	20222162
chr1	20222405
chr1	20222537
chr1	20223279
chr1	20224699
chr1	20224865
chr1	20227772
chr1	20228881
chr1	20229169
chr1	20229255
chr1	20229361
chr1	20229394
chr1	20229409
chr1	20229439
chr1	20236220
chr1	20236253
chr1	20236276
chr1	20236476
chr1	20236478
chr1	20236696
chr1	20241601
chr1	20241887
chr1	20241963
chr1	20244160
chr1	20244949
chr1	20244951
chr1	20245070
chr1	20247031
chr1	20247074
chr1	20247292
chr1	20247297
chr1	20247983
chr1	20249174
chr1	20249210
chr1	20255602
chr1	20255762
chr1	20255857
chr1	20255999
chr1	20256102
chr1	20256140
chr1	20259919
chr1	20261472
chr1	20267422
chr1	20268565
chr1	20268607
chr1	20268728
chr1	20269300
chr1	20269918
chr1	20270017
chr1	20275482
chr1	20283980
chr1	20284833
chr1	20286964
chr1	20292375
chr1	20295228
chr1	20296868
chr1	20298416
chr1	20305827
chr1	20306679
chr1	20310199
chr1	20324745
chr1	20325690
chr1	20327983
chr1	20340968
chr1	20341413
chr1	20343136
chr1	20350225
chr1	20350688
chr1	20350942
chr1	20352817
chr1	20352884
chr1	20354302
chr1	20356557
chr1	20356849
chr1	20356854
chr1	20357165
chr1	20357787
chr1	20357832
chr1	20358567
chr1	20358586
chr1	20358596
chr1	20358856
chr1	20358972
chr1	20359257
chr1	20359328
chr1	20359827
chr1	20359982
chr1	20360032
chr1	20362038
chr1	20362145
chr1	20364445
chr1	20364500
chr1	20364546
chr1	20364569
chr1	20364690
chr1	20364800
chr1	20365170
chr1	20365179
chr1	20365509
chr1	20365726
chr1	20365883
chr1	20380600
chr1	20383523
chr1	20384726
chr1	20384745
chr1	20384757
chr1	20387381
chr1	20389430
chr1	20389434
chr1	20389822
chr1	20390032
chr1	20390343
chr1	20390713
chr1	20390896
chr1	20390996
chr1	20393914
chr1	20393968
chr1	20394564
chr1	20394578
chr1	20394630
chr1	20394642
chr1	20394654
chr1	20395224
chr1	20395363
chr1	20395382
chr1	20395488
chr1	20395503
chr1	20395753
chr1	20395882
chr1	20395987
chr1	20396038
chr1	20396182
chr1	20396245
chr1	20396329
chr1	20396332
chr1	20396419
chr1	20396687
chr1	20401911
chr1	20402264
chr1	20402296
chr1	20402317
chr1	20402351
chr1	20402904
chr1	20405820
chr1	20406084
chr1	20406087
chr1	20406465
chr1	20406844
chr1	20407165
chr1	20413152
chr1	20413755
chr1	20413770
chr1	20414271
chr1	20414978
chr1	20417050
chr1	20417303
chr1	20417379
chr1	20418732
chr1	20419691
chr1	20420749
chr1	20420791
chr1	20420822
chr1	20424428
chr1	20425766
chr1	20425800
chr1	20426747
chr1	20426920
chr1	20427195
chr1	20427334
chr1	20427369
chr1	20427373
chr1	20427417
chr1	20427569
chr1	20427640
chr1	20428099
chr1	20428429
chr1	20428832
chr1	20429092
chr1	20429104
chr1	20429141
chr1	20429249
chr1	20429268
chr1	20430040
chr1	20430061
chr1	20430110
chr1	20430787
chr1	20431133
chr1	20431467
chr1	20431845
chr1	20433001
chr1	20433012
chr1	20434821
chr1	20434879
chr1	20434891
chr1	20434976
chr1	20435070
chr1	20435301
chr1	20435492
chr1	20435504
chr1	20435802
chr1	20435848
chr1	20435912
chr1	20435917
chr1	20439526
chr1	20439691
chr1	20439706
chr1	20439838
chr1	20440869
chr1	20440926
chr1	20441007
chr1	20441040
chr1	20451641
chr1	20451643
chr1	20451722
chr1	20451929
chr1	20452329
chr1	20452460
chr1	20452635
chr1	20453228
chr1	20453312
chr1	20453317
chr1	20453374
chr1	20453556
chr1	20455141
chr1	20455150
chr1	20455208
chr1	20455378
chr1	20455398
chr1	20455408
chr1	20455432
chr1	20455441
chr1	20455823
chr1	20455996
chr1	20456016
chr1	20457570
chr1	20457576
chr1	20457581
chr1	20457596
chr1	20457597
chr1	20457663
chr1	20457720
chr1	20457756
chr1	20457780
chr1	20457852
chr1	20457857
chr1	20457888
chr1	20457921
chr1	20457969
chr1	20458039
chr1	20458293
chr1	20458445
chr1	20458454
chr1	20458461
chr1	20458472
chr1	20459132
chr1	20459248
chr1	20459310
chr1	20459349
chr1	20459521
chr1	20459584
chr1	20459602
chr1	20459605
chr1	20459609
chr1	20459647
chr1	20459853
chr1	20459877
chr1	20460144
chr1	20460162
chr1	20460252
chr1	20460291
chr1	20460357
chr1	20460434
chr1	20460563
chr1	20470827
chr1	20470942
chr1	20471058
chr1	20471294
chr1	20471586
chr1	20471587
chr1	20471869
chr1	20471899
chr1	20471913
chr1	20471934
chr1	20471936
chr1	20471994
chr1	20472002
chr1	20472008
chr1	20472121
chr1	20472202
chr1	20472814
chr1	20472831
chr1	20473207
chr1	20473240
chr1	20473371
chr1	20473562
chr1	20473820
chr1	20473934
chr1	20473981
chr1	20474130
chr1	20474143
chr1	20474171
chr1	20474172
chr1	20474258
chr1	20474425
chr1	20474480
chr1	20474597
chr1	20474602
chr1	20474800
chr1	20474967
chr1	20475074
chr1	20502821
chr1	20511597
chr1	20511744
chr1	20511750
chr1	20511999
chr1	20512008
chr1	20512108
chr1	20512128
chr1	20512185
chr1	20512218
chr1	20512227
chr1	20514718
chr1	20514744
chr1	20515204
chr1	20515295
chr1	20515342
chr1	20515640
chr1	20515742
chr1	20516019
chr1	20516121
chr1	20516378
chr1	20525971
chr1	20525988
chr1	20527355
chr1	20527784
chr1	20528308
chr1	20528341
chr1	20528696
chr1	20528741
chr1	20528757
chr1	20528783
chr1	20528804
chr1	20528877
chr1	20528903
chr1	20528918
chr1	20529068
chr1	20529137
chr1	20529146
chr1	20529182
chr1	20529242
chr1	20529243
chr1	20529459
chr1	20529468
chr1	20529530
chr1	20529555
chr1	20529729
chr1	20529741
chr1	20529876
chr1	20529900
chr1	20530083
chr1	20530091
chr1	20530101
chr1	20534972
chr1	20535092
chr1	20535170
chr1	20535202
chr1	20535227
chr1	20535249
chr1	20535280
chr1	20535508
chr1	20535526
chr1	20536322
chr1	20536665
chr1	20537803
chr1	20537823
chr1	20537859
chr1	20537895
chr1	20538364
chr1	20538394
chr1	20538594
chr1	20538635
chr1	20538641
chr1	20538673
chr1	20538754
chr1	20539067
chr1	20542829
chr1	20542832
chr1	20543886
chr1	20543932
chr1	20544061
chr1	20544226
chr1	20544236
chr1	20544446
chr1	20544459
chr1	20544502
chr1	20544568
chr1	20544625
chr1	20544911
chr1	20544927
chr1	20545065
chr1	20545330
chr1	20545369
chr1	20545557
chr1	20545688
chr1	20545698
chr1	20553116
chr1	20553575
chr1	20553605
chr1	20553812
chr1	20553832
chr1	20554115
chr1	20554500
chr1	20554510
chr1	20555157
chr1	20555353
chr1	20555404
chr1	20555446
chr1	20555668
chr1	20555671
chr1	20555674
chr1	20555743
chr1	20555794
chr1	20555950
chr1	20555958
chr1	20555988
chr1	20556006
chr1	20556210
chr1	20556407
chr1	20556506
chr1	20556540
chr1	20556583
chr1	20556798
chr1	20557445
chr1	20558233
chr1	20558426
chr1	20558448
chr1	20560331
chr1	20560333
chr1	20560415
chr1	20560616
chr1	20560649
chr1	20560719
chr1	20560727
chr1	20560730
chr1	20560766
chr1	20560817
chr1	20560890
chr1	20560931
chr1	20561009
chr1	20561238
chr1	20561297
chr1	20561483
chr1	20561525
chr1	20561680
chr1	20561901
chr1	20562063
chr1	20562500
chr1	20562605
chr1	20562853
chr1	20562855
chr1	20567822
chr1	20570572
chr1	20571720
chr1	20571782
chr1	20572598
chr1	20575661
chr1	20576256
chr1	20577603
chr1	20577732
chr1	20577783
chr1	20577843
chr1	20578026
chr1	20578055
chr1	20578140
chr1	20578193
chr1	20578679
chr1	20579921
chr1	20580922
chr1	20581703
chr1	20582564
chr1	20584126
chr1	20584528
chr1	20584529
chr1	20586073
chr1	20587456
chr1	20588415
chr1	20589028
chr1	20589032
chr1	20589118
chr1	20594857
chr1	20608477
chr1	20608711
chr1	20609488
chr1	20609868
chr1	20610160
chr1	20610292
chr1	20611818
chr1	20612473
chr1	20617400
chr1	20617500
chr1	20617721
chr1	20618056
chr1	20618512
chr1	20618989
chr1	20619694
chr1	20619790
chr1	20624105
chr1	20628430
chr1	20628964
chr1	20629384
chr1	20629527
chr1	20631990
chr1	20632161
chr1	20632786
chr1	20636699
chr1	20637968
chr1	20637974
chr1	20639192
chr1	20640750
chr1	20642136
chr1	20642169
chr1	20642359
chr1	20643271
chr1	20643783
chr1	20645110
chr1	20646351
chr1	20646542
chr1	20646641
chr1	20646642
chr1	20646891
chr1	20648036
chr1	20652398
chr1	20652443
chr1	20653100
chr1	20653625
chr1	20654078
chr1	20654690
chr1	20659233
chr1	20662211
chr1	20664752
chr1	20666808
chr1	20670125
chr1	20673539
chr1	20674090
chr1	20674181
chr1	20674183
chr1	20674304
chr1	20701623
chr1	20701630
chr1	20701838
chr1	20701928
chr1	20701955
chr1	20702308
chr1	20702309
chr1	20702344
chr1	20702422
chr1	20702570
chr1	20702671
chr1	20702696
chr1	20702750
chr1	20702915
chr1	20703233
chr1	20703293
chr1	20703308
chr1	20703358
chr1	20703511
chr1	20703564
chr1	20705145
chr1	20705449
chr1	20705493
chr1	20705494
chr1	20705547
chr1	20705644
chr1	20705650
chr1	20705686
chr1	20705707
chr1	20705746
chr1	20705773
chr1	20705785
chr1	20705866
chr1	20705893
chr1	20705908
chr1	20706037
chr1	20706177
chr1	20706205
chr1	20706209
chr1	20706316
chr1	20706510
chr1	20706511
chr1	20706566
chr1	20706567
chr1	20706657
chr1	20706685
chr1	20707614
chr1	20707626
chr1	20707761
chr1	20707801
chr1	20707836
chr1	20708472
chr1	20708526
chr1	20708725
chr1	20708775
chr1	20711624
chr1	20711706
chr1	20711890
chr1	20712266
chr1	20712278
chr1	20712575
chr1	20712598
chr1	20712653
chr1	20712678
chr1	20712687
chr1	20715440
chr1	20715592
chr1	20715891
chr1	20716289
chr1	20716489
chr1	20716989
chr1	20718740
chr1	20720010
chr1	20720013
chr1	20720211
chr1	20720214
chr1	20720254
chr1	20720262
chr1	20721071
chr1	20721301
chr1	20721324
chr1	20722169
chr1	20722194
chr1	20722214
chr1	20722236
chr1	20722256
chr1	20722433
chr1	20722528
chr1	20723534
chr1	20724061
chr1	20724652
chr1	20725737
chr1	20726683
chr1	20726916
chr1	20727566
chr1	20729856
chr1	20729901
chr1	20729919
chr1	20730198
chr1	20730960
chr1	20731666
chr1	20731954
chr1	20732557
chr1	20733075
chr1	20733374
chr1	20734624
chr1	20734956
chr1	20736222
chr1	20736398
chr1	20737080
chr1	20737392
chr1	20737477
chr1	20738086
chr1	20740024
chr1	20740438
chr1	20749069
chr1	20749732
chr1	20751503
chr1	20764363
chr1	20765177
chr1	20770064
chr1	20779966
chr1	20779987
chr1	20780159
chr1	20780179
chr1	20780378
chr1	20782448
chr1	20782663
chr1	20782689
chr1	20783225
chr1	20787235
chr1	20787308
chr1	20787979
chr1	20790964
chr1	20791133
chr1	20792935
chr1	20792999
chr1	20793016
chr1	20793224
chr1	20793351
chr1	20793355
chr1	20800871
chr1	20801023
chr1	20801039
chr1	20803980
chr1	20804422
chr1	20804537
chr1	20804813
chr1	20805022
chr1	20805577
chr1	20805711
chr1	20806453
chr1	20807764
chr1	20808494
chr1	20808925
chr1	20809106
chr1	20809235
chr1	20810185
chr1	20810798
chr1	20828925
chr1	20831150
chr1	20831170
chr1	20831298
chr1	20831337
chr1	20831365
chr1	20831385
chr1	20831538
chr1	20831698
chr1	20831707
chr1	20831713
chr1	20831731
chr1	20832039
chr1	20833081
chr1	20833744
chr1	20833748
chr1	20833758
chr1	20833955
chr1	20834216
chr1	20834310
chr1	20835629
chr1	20838380
chr1	20841055
chr1	20841388
chr1	20842173
chr1	20843972
chr1	20844404
chr1	20844405
chr1	20845167
chr1	20859042
chr1	20861511
chr1	20861713
chr1	20863860
chr1	20864608
chr1	20864747
chr1	20864932
chr1	20865408
chr1	20865432
chr1	20865715
chr1	20866016
chr1	20866342
chr1	20866679
chr1	20866893
chr1	20866988
chr1	20869610
chr1	20869612
chr1	20869613
chr1	20872541
chr1	20872670
chr1	20874104
chr1	20874444
chr1	20877285
chr1	20877297
chr1	20878260
chr1	20879825
chr1	20882195
chr1	20883565
chr1	20883934
chr1	20886008
chr1	20888588
chr1	20889377
chr1	20889398
chr1	20889896
chr1	20891492
chr1	20892130
chr1	20893118
chr1	20893157
chr1	20893902
chr1	20893919
chr1	20894150
chr1	20894191
chr1	20894431
chr1	20894534
chr1	20894679
chr1	20895788
chr1	20895875
chr1	20896177
chr1	20896687
chr1	20896937
chr1	20896938
chr1	20897152
chr1	20897263
chr1	20897336
chr1	20897752
chr1	20897927
chr1	20898240
chr1	20898279
chr1	20898986
chr1	20898988
chr1	20899043
chr1	20899066
chr1	20899134
chr1	20899219
chr1	20899345
chr1	20899348
chr1	20899423
chr1	20899424
chr1	20899436
chr1	20899448
chr1	20899659
chr1	20899664
chr1	20899667
chr1	20899748
chr1	20899754
chr1	20899993
chr1	20900029
chr1	20900119
chr1	20900125
chr1	20900159
chr1	20900174
chr1	20900212
chr1	20900325
chr1	20900409
chr1	20900414
chr1	20900526
chr1	20900547
chr1	20901066
chr1	20901543
chr1	20901717
chr1	20901749
chr1	20901762
chr1	20901826
chr1	20901938
chr1	20901994
chr1	20902488
chr1	20902565
chr1	20902603
chr1	20902662
chr1	20902710
chr1	20902725
chr1	20902729
chr1	20903138
chr1	20903802
chr1	20903906
chr1	20905204
chr1	20905225
chr1	20905390
chr1	20905392
chr1	20905474
chr1	20905499
chr1	20905517
chr1	20905546
chr1	20905559
chr1	20905571
chr1	20905631
chr1	20907093
chr1	20907682
chr1	20908583
chr1	20908745
chr1	20908792
chr1	20908898
chr1	20908971
chr1	20909039
chr1	20909215
chr1	20909513
chr1	20909618
chr1	20912749
chr1	20912758
chr1	20912803
chr1	20912839
chr1	20912905
chr1	20912977
chr1	20913031
chr1	20913037
chr1	20913091
chr1	20913188
chr1	20913273
chr1	20918866
chr1	20918935
chr1	20919030
chr1	20919035
chr1	20919076
chr1	20919096
chr1	20919602
chr1	20919977
chr1	20920485
chr1	20920623
chr1	20921143
chr1	20921182
chr1	20921264
chr1	20921968
chr1	20921970
chr1	20921981
chr1	20922022
chr1	20922106
chr1	20926887
chr1	20927267
chr1	20927280
chr1	20927396
chr1	20927975
chr1	20928519
chr1	20928927
chr1	20928957
chr1	20928969
chr1	20929017
chr1	20929032
chr1	20929128
chr1	20929160
chr1	20929164
chr1	20929407
chr1	20929408
chr1	20929643
chr1	20929760
chr1	20932362
chr1	20933233
chr1	20933248
chr1	20933305
chr1	20933487
chr1	20933526
chr1	20933873
chr1	20933943
chr1	20934035
chr1	20934889
chr1	20935125
chr1	20935652
chr1	20936072
chr1	20936342
chr1	20936581
chr1	20936804
chr1	20937192
chr1	20937758
chr1	20938275
chr1	20938276
chr1	20941119
chr1	20945894
chr1	20946360
chr1	20952029
chr1	20952284
chr1	20952681
chr1	20953044
chr1	20953045
chr1	20953046
chr1	20953091
chr1	20953097
chr1	20953271
chr1	20953289
chr1	20953354
chr1	20953469
chr1	20953510
chr1	20963001
chr1	20963143
chr1	20963436
chr1	20966299
chr1	20966934
chr1	20967905
chr1	20969931
chr1	20970681
chr1	20971588
chr1	20971670
chr1	20976074
chr1	20977985
chr1	20978055
chr1	20978073
chr1	20978400
chr1	20978482
chr1	20978590
chr1	20978615
chr1	20978945
chr1	20984463
chr1	20984542
chr1	20984641
chr1	20984811
chr1	20985593
chr1	20985676
chr1	20986419
chr1	20986649
chr1	20986855
chr1	20987246
chr1	20992143
chr1	20992648
chr1	20993900
chr1	20993906
chr1	20994930
chr1	20995098
chr1	20996528
chr1	20997193
chr1	20997368
chr1	20998154
chr1	20999282
chr1	20999915
chr1	21000124
chr1	21000218
chr1	21003067
chr1	21003499
chr1	21003823
chr1	21004736
chr1	21005439
chr1	21005845
chr1	21006962
chr1	21006997
chr1	21007029
chr1	21007258
chr1	21007319
chr1	21007636
chr1	21007914
chr1	21008698
chr1	21009661
chr1	21010262
chr1	21011011
chr1	21011435
chr1	21011523
chr1	21013738
chr1	21013865
chr1	21024441
chr1	21025732
chr1	21028634
chr1	21030448
chr1	21030599
chr1	21031237
chr1	21031241
chr1	21031345
chr1	21031666
chr1	21043446
chr1	21043714
chr1	21043717
chr1	21043749
chr1	21043780
chr1	21043814
chr1	21043831
chr1	21044231
chr1	21044294
chr1	21044307
chr1	21044323
chr1	21044497
chr1	21044556
chr1	21044614
chr1	21052286
chr1	21052747
chr1	21052931
chr1	21053095
chr1	21053696
chr1	21056362
chr1	21056378
chr1	21056469
chr1	21056561
chr1	21056568
chr1	21056696
chr1	21056714
chr1	21056828
chr1	21057218
chr1	21057225
chr1	21057268
chr1	21057341
chr1	21057344
chr1	21057395
chr1	21057490
chr1	21059837
chr1	21061728
chr1	21061734
chr1	21061751
chr1	21061815
chr1	21061971
chr1	21061974
chr1	21061980
chr1	21062056
chr1	21062088
chr1	21062170
chr1	21062734
chr1	21062791
chr1	21062820
chr1	21064485
chr1	21064531
chr1	21064590
chr1	21064644
chr1	21064650
chr1	21065613
chr1	21065626
chr1	21065631
chr1	21065686
chr1	21065719
chr1	21072937
chr1	21073758
chr1	21073989
chr1	21076080
chr1	21076859
chr1	21077487
chr1	21077714
chr1	21077716
chr1	21078236
chr1	21078342
chr1	21078402
chr1	21078497
chr1	21078515
chr1	21078568
chr1	21078635
chr1	21078645
chr1	21078714
chr1	21078929
chr1	21078933
chr1	21079021
chr1	21079071
chr1	21079862
chr1	21079923
chr1	21080120
chr1	21080310
chr1	21084282
chr1	21085412
chr1	21085620
chr1	21085708
chr1	21087176
chr1	21090337
chr1	21090603
chr1	21090676
chr1	21091115
chr1	21091337
chr1	21091376
chr1	21091394
chr1	21091400
chr1	21091580
chr1	21091815
chr1	21091973
chr1	21091994
chr1	21092091
chr1	21092610
chr1	21093325
chr1	21093350
chr1	21093419
chr1	21093456
chr1	21093496
chr1	21093511
chr1	21093692
chr1	21093720
chr1	21093829
chr1	21093993
chr1	21093994
chr1	21094040
chr1	21095034
chr1	21095076
chr1	21095139
chr1	21095151
chr1	21095972
chr1	21095984
chr1	21096064
chr1	21096092
chr1	21096101
chr1	21096331
chr1	21096337
chr1	21097165
chr1	21097171
chr1	21097208
chr1	21097246
chr1	21097264
chr1	21097516
chr1	21123854
chr1	21129151
chr1	21129620
chr1	21130673
chr1	21139353
chr1	21140983
chr1	21141054
chr1	21141119
chr1	21141159
chr1	21141969
chr1	21142539
chr1	21143135
chr1	21144347
chr1	21146389
chr1	21146393
chr1	21146882
chr1	21146894
chr1	21147674
chr1	21147707
chr1	21147716
chr1	21147781
chr1	21147788
chr1	21148076
chr1	21148190
chr1	21148211
chr1	21148337
chr1	21148475
chr1	21148548
chr1	21148567
chr1	21149151
chr1	21149360
chr1	21149405
chr1	21149484
chr1	21149490
chr1	21149513
chr1	21159961
chr1	21160005
chr1	21160279
chr1	21161466
chr1	21161467
chr1	21161636
chr1	21161770
chr1	21161835
chr1	21174773
chr1	21174786
chr1	21174821
chr1	21175003
chr1	21175122
chr1	21175227
chr1	21175492
chr1	21176381
chr1	21176384
chr1	21184431
chr1	21192682
chr1	21192738
chr1	21192756
chr1	21192832
chr1	21192889
chr1	21193051
chr1	21193578
chr1	21193626
chr1	21193627
chr1	21193674
chr1	21193701
chr1	21193719
chr1	21193722
chr1	21193819
chr1	21193820
chr1	21193881
chr1	21193917
chr1	21193927
chr1	21193947
chr1	21193950
chr1	21193995
chr1	21194076
chr1	21194130
chr1	21194181
chr1	21194232
chr1	21194304
chr1	21194307
chr1	21194541
chr1	21194971
chr1	21195082
chr1	21195742
chr1	21196022
chr1	21196116
chr1	21196117
chr1	21196776
chr1	21197764
chr1	21197859
chr1	21198249
chr1	21198364
chr1	21204676
chr1	21206994
chr1	21207536
chr1	21207564
chr1	21207660
chr1	21207706
chr1	21207916
chr1	21207994
chr1	21208004
chr1	21208114
chr1	21209257
chr1	21209305
chr1	21209328
chr1	21209409
chr1	21209458
chr1	21209480
chr1	21209510
chr1	21209512
chr1	21209530
chr1	21209546
chr1	21212155
chr1	21212163
chr1	21212407
chr1	21212647
chr1	21212833
chr1	21213218
chr1	21213284
chr1	21213346
chr1	21213701
chr1	21214061
chr1	21214116
chr1	21214117
chr1	21214181
chr1	21214182
chr1	21214202
chr1	21214315
chr1	21214395
chr1	21214574
chr1	21215070
chr1	21215071
chr1	21238164
chr1	21238670
chr1	21239231
chr1	21239775
chr1	21240287
chr1	21240887
chr1	21243290
chr1	21254039
chr1	21254051
chr1	21254177
chr1	21254456
chr1	21254542
chr1	21255034
chr1	21255402
chr1	21263545
chr1	21263699
chr1	21263863
chr1	21263925
chr1	21264007
chr1	21264448
chr1	21264553
chr1	21264649
chr1	21265005
chr1	21265008
chr1	21265270
chr1	21265338
chr1	21265420
chr1	21310280
chr1	21310517
chr1	21311469
chr1	21330596
chr1	21330647
chr1	21330929
chr1	21331034
chr1	21331282
chr1	21331332
chr1	21331569
chr1	21331570
chr1	21334536
chr1	21337266
chr1	21337554
chr1	21337572
chr1	21337629
chr1	21337701
chr1	21337775
chr1	21337819
chr1	21337935
chr1	21337956
chr1	21338015
chr1	21338092
chr1	21338185
chr1	21338615
chr1	21343340
chr1	21343435
chr1	21343916
chr1	21355806
chr1	21355931
chr1	21356178
chr1	21356193
chr1	21362716
chr1	21364143
chr1	21364261
chr1	21364571
chr1	21370833
chr1	21370996
chr1	21371018
chr1	21372261
chr1	21373779
chr1	21373838
chr1	21373899
chr1	21378334
chr1	21378612
chr1	21393520
chr1	21393528
chr1	21393548
chr1	21393576
chr1	21393803
chr1	21393804
chr1	21395743
chr1	21395833
chr1	21396337
chr1	21396346
chr1	21396467
chr1	21396508
chr1	21397330
chr1	21397550
chr1	21397855
chr1	21404629
chr1	21404789
chr1	21408678
chr1	21408795
chr1	21409085
chr1	21409153
chr1	21409628
chr1	21410477
chr1	21411918
chr1	21412215
chr1	21412311
chr1	21414835
chr1	21414864
chr1	21414922
chr1	21415335
chr1	21415810
chr1	21415855
chr1	21416046
chr1	21416877
chr1	21425382
chr1	21427240
chr1	21429822
chr1	21429870
chr1	21429976
chr1	21430073
chr1	21430205
chr1	21430313
chr1	21430316
chr1	21431275
chr1	21431326
chr1	21431327
chr1	21431341
chr1	21431547
chr1	21431835
chr1	21432266
chr1	21433045
chr1	21433955
chr1	21433965
chr1	21434582
chr1	21434892
chr1	21434901
chr1	21435324
chr1	21435834
chr1	21440135
chr1	21442360
chr1	21451338
chr1	21454454
chr1	21454457
chr1	21456196
chr1	21456387
chr1	21456959
chr1	21456965
chr1	21456999
chr1	21457027
chr1	21457164
chr1	21457172
chr1	21457328
chr1	21457375
chr1	21457384
chr1	21457429
chr1	21457436
chr1	21459155
chr1	21460064
chr1	21460158
chr1	21460218
chr1	21461218
chr1	21461383
chr1	21461539
chr1	21461558
chr1	21461633
chr1	21461680
chr1	21461716
chr1	21461776
chr1	21464028
chr1	21464143
chr1	21464257
chr1	21464643
chr1	21465906
chr1	21468218
chr1	21479403
chr1	21489376
chr1	21489403
chr1	21489703
chr1	21489721
chr1	21489927
chr1	21490205
chr1	21490307
chr1	21490333
chr1	21490868
chr1	21491158
chr1	21491165
chr1	21491321
chr1	21491771
chr1	21491836
chr1	21492082
chr1	21492097
chr1	21492444
chr1	21492575
chr1	21493905
chr1	21494004
chr1	21494187
chr1	21494341
chr1	21495083
chr1	21495104
chr1	21496483
chr1	21497764
chr1	21498020
chr1	21498374
chr1	21498393
chr1	21498450
chr1	21498575
chr1	21498590
chr1	21498665
chr1	21498756
chr1	21498804
chr1	21499123
chr1	21499168
chr1	21499251
chr1	21499690
chr1	21499706
chr1	21500237
chr1	21500242
chr1	21500802
chr1	21501085
chr1	21501608
chr1	21501632
chr1	21501704
chr1	21503248
chr1	21503254
chr1	21503381
chr1	21505439
chr1	21505478
chr1	21506267
chr1	21512646
chr1	21512743
chr1	21513051
chr1	21513712
chr1	21515751
chr1	21515903
chr1	21515973
chr1	21516039
chr1	21516090
chr1	21516305
chr1	21516498
chr1	21516551
chr1	21517060
chr1	21517099
chr1	21517357
chr1	21517959
chr1	21518025
chr1	21518046
chr1	21530109
chr1	21530205
chr1	21530624
chr1	21530630
chr1	21538133
chr1	21538389
chr1	21538878
chr1	21548192
chr1	21549166
chr1	21549835
chr1	21550713
chr1	21551580
chr1	21553712
chr1	21553797
chr1	21553905
chr1	21553941
chr1	21553998
chr1	21554016
chr1	21554048
chr1	21554109
chr1	21554139
chr1	21554154
chr1	21554197
chr1	21554442
chr1	21554505
chr1	21558520
chr1	21559043
chr1	21559052
chr1	21559263
chr1	21559414
chr1	21559558
chr1	21559696
chr1	21560795
chr1	21561180
chr1	21561267
chr1	21561300
chr1	21561463
chr1	21562447
chr1	21562737
chr1	21562738
chr1	21562812
chr1	21562876
chr1	21566205
chr1	21566732
chr1	21566793
chr1	21566867
chr1	21566902
chr1	21566918
chr1	21566982
chr1	21569822
chr1	21569847
chr1	21570206
chr1	21570917
chr1	21570981
chr1	21573136
chr1	21573765
chr1	21574139
chr1	21574395
chr1	21574836
chr1	21575190
chr1	21575310
chr1	21575507
chr1	21576591
chr1	21577787
chr1	21578108
chr1	21578289
chr1	21578371
chr1	21578832
chr1	21578837
chr1	21579763
chr1	21579902
chr1	21580557
chr1	21587248
chr1	21587271
chr1	21587443
chr1	21587645
chr1	21588194
chr1	21588536
chr1	21588589
chr1	21588626
chr1	21588667
chr1	21590200
chr1	21590432
chr1	21591066
chr1	21591678
chr1	21593306
chr1	21593967
chr1	21594012
chr1	21594156
chr1	21594467
chr1	21594576
chr1	21595785
chr1	21596702
chr1	21596773
chr1	21596949
chr1	21597831
chr1	21597836
chr1	21598557
chr1	21598924
chr1	21599383
chr1	21600301
chr1	21600617
chr1	21601242
chr1	21601555
chr1	21624313
chr1	21624325
chr1	21624481
chr1	21624514
chr1	21624642
chr1	21624754
chr1	21625012
chr1	21625842
chr1	21625845
chr1	21630706
chr1	21630707
chr1	21630804
chr1	21633135
chr1	21663283
chr1	21663293
chr1	21663356
chr1	21666007
chr1	21666312
chr1	21666346
chr1	21677021
chr1	21677145
chr1	21677821
chr1	21678858
chr1	21678888
chr1	21679124
chr1	21679237
chr1	21679254
chr1	21679559
chr1	21679751
chr1	21679754
chr1	21679887
chr1	21679989
chr1	21680034
chr1	21680229
chr1	21680280
chr1	21680329
chr1	21680416
chr1	21689354
chr1	21689357
chr1	21689642
chr1	21689929
chr1	21690221
chr1	21696177
chr1	21696235
chr1	21696835
chr1	21697334
chr1	21697581
chr1	21697822
chr1	21707373
chr1	21707643
chr1	21707956
chr1	21707957
chr1	21707996
chr1	21708021
chr1	21713889
chr1	21714273
chr1	21715703
chr1	21727216
chr1	21727499
chr1	21727712
chr1	21727720
chr1	21727754
chr1	21727802
chr1	21727811
chr1	21727931
chr1	21727963
chr1	21727966
chr1	21728023
chr1	21728029
chr1	21728087
chr1	21728122
chr1	21728163
chr1	21728724
chr1	21733502
chr1	21736596
chr1	21737216
chr1	21737531
chr1	21743226
chr1	21743540
chr1	21762761
chr1	21763325
chr1	21764521
chr1	21765160
chr1	21859762
chr1	21859821
chr1	21859959
chr1	21860019
chr1	21860020
chr1	21860026
chr1	21860144
chr1	21860150
chr1	21860412
chr1	21860443
chr1	21860601
chr1	21860872
chr1	21860884
chr1	21860913
chr1	21860929
chr1	21861450
chr1	21861510
chr1	21861609
chr1	21862118
chr1	21862217
chr1	21862244
chr1	21862592
chr1	21862701
chr1	21863651
chr1	21864035
chr1	21864413
chr1	21864738
chr1	21865425
chr1	21865697
chr1	21865862
chr1	21865980
chr1	21866054
chr1	21866171
chr1	21878118
chr1	21878346
chr1	21882107
chr1	21882129
chr1	21882646
chr1	21888326
chr1	21891553
chr1	21893302
chr1	21894818
chr1	21895245
chr1	21895882
chr1	21896508
chr1	21896572
chr1	21896718
chr1	21896722
chr1	21898870
chr1	21899035
chr1	21902738
chr1	21903112
chr1	21904197
chr1	21904824
chr1	21904993
chr1	21905002
chr1	21905299
chr1	21909446
chr1	21909488
chr1	21910010
chr1	21910190
chr1	21910204
chr1	21910320
chr1	21910526
chr1	21910577
chr1	21910791
chr1	21910895
chr1	21910912
chr1	21921232
chr1	21921425
chr1	21921443
chr1	21921670
chr1	21921718
chr1	21921875
chr1	21921905
chr1	21922184
chr1	21922215
chr1	21922391
chr1	21922397
chr1	21922442
chr1	21922446
chr1	21922654
chr1	21922666
chr1	21922759
chr1	21925153
chr1	21925623
chr1	21925969
chr1	21925990
chr1	21926103
chr1	21926257
chr1	21926374
chr1	21926759
chr1	21927063
chr1	21927156
chr1	21929273
chr1	21936682
chr1	21937312
chr1	21937315
chr1	21937466
chr1	21937695
chr1	21938685
chr1	21938718
chr1	21938910
chr1	21939027
chr1	21939117
chr1	21939275
chr1	21939391
chr1	21939406
chr1	21939454
chr1	21939460
chr1	21979631
chr1	21980000
chr1	21980423
chr1	21980538
chr1	21980617
chr1	21980629
chr1	21981092
chr1	21981276
chr1	21981757
chr1	21981813
chr1	21982262
chr1	21982351
chr1	21982545
chr1	21982990
chr1	21983463
chr1	21983825
chr1	21983905
chr1	21983939
chr1	21984181
chr1	21984395
chr1	21984841
chr1	21985013
chr1	21985058
chr1	21985385
chr1	21985499
chr1	21986193
chr1	21986194
chr1	21986380
chr1	21986669
chr1	21986687
chr1	21987247
chr1	21988642
chr1	21988757
chr1	21988770
chr1	21988812
chr1	21988891
chr1	21989425
chr1	21989480
chr1	21989618
chr1	21989997
chr1	21990115
chr1	22011590
chr1	22011685
chr1	22012269
chr1	22012738
chr1	22013695
chr1	22014475
chr1	22014910
chr1	22014921
chr1	22015090
chr1	22015232
chr1	22016123
chr1	22016403
chr1	22016468
chr1	22016711
chr1	22017148
chr1	22017159
chr1	22017359
chr1	22017810
chr1	22018277
chr1	22019150
chr1	22019159
chr1	22019177
chr1	22019183
chr1	22019414
chr1	22019783
chr1	22019822
chr1	22019933
chr1	22019945
chr1	22019996
chr1	22020030
chr1	22020293
chr1	22020298
chr1	22020656
chr1	22020704
chr1	22020849
chr1	22020876
chr1	22021016
chr1	22021118
chr1	22021276
chr1	22021445
chr1	22021599
chr1	22021788
chr1	22022186
chr1	22022210
chr1	22022286
chr1	22022341
chr1	22026536
chr1	22026810
chr1	22026879
chr1	22027977
chr1	22028185
chr1	22028330
chr1	22028334
chr1	22028336
chr1	22028483
chr1	22028644
chr1	22028716
chr1	22028795
chr1	22028810
chr1	22028966
chr1	22029000
chr1	22029040
chr1	22029068
chr1	22030082
chr1	22031912
chr1	22032405
chr1	22032413
chr1	22032579
chr1	22032634
chr1	22032637
chr1	22033487
chr1	22033956
chr1	22033976
chr1	22035621
chr1	22037143
chr1	22043919
chr1	22044993
chr1	22048084
chr1	22048176
chr1	22051399
chr1	22051919
chr1	22052683
chr1	22052699
chr1	22052759
chr1	22052951
chr1	22053001
chr1	22053595
chr1	22053777
chr1	22053778
chr1	22054024
chr1	22054042
chr1	22054783
chr1	22055004
chr1	22055013
chr1	22055088
chr1	22055100
chr1	22055109
chr1	22055226
chr1	22055304
chr1	22055364
chr1	22055367
chr1	22055382
chr1	22055388
chr1	22055417
chr1	22055462
chr1	22055748
chr1	22055993
chr1	22056054
chr1	22056104
chr1	22056121
chr1	22056134
chr1	22056164
chr1	22056212
chr1	22056252
chr1	22056349
chr1	22056657
chr1	22056680
chr1	22056771
chr1	22056800
chr1	22056807
chr1	22056990
chr1	22057094
chr1	22071296
chr1	22071374
chr1	22071386
chr1	22071437
chr1	22071446
chr1	22071557
chr1	22072033
chr1	22072298
chr1	22072317
chr1	22072590
chr1	22072601
chr1	22072839
chr1	22072857
chr1	22073038
chr1	22073660
chr1	22073670
chr1	22073687
chr1	22073719
chr1	22073747
chr1	22073777
chr1	22073816
chr1	22073902
chr1	22073924
chr1	22073939
chr1	22073981
chr1	22074007
chr1	22074009
chr1	22074020
chr1	22074067
chr1	22074091
chr1	22074203
chr1	22074245
chr1	22074290
chr1	22074356
chr1	22074380
chr1	22074416
chr1	22074419
chr1	22074432
chr1	22074466
chr1	22074527
chr1	22074545
chr1	22074612
chr1	22081043
chr1	22081057
chr1	22081161
chr1	22081200
chr1	22081404
chr1	22082434
chr1	22082795
chr1	22082911
chr1	22083942
chr1	22084665
chr1	22096008
chr1	22143403
chr1	22143659
chr1	22143793
chr1	22144011
chr1	22144185
chr1	22144322
chr1	22145382
chr1	22145408
chr1	22145505
chr1	22145524
chr1	22148739
chr1	22148891
chr1	22148957
chr1	22149392
chr1	22151840
chr1	22152420
chr1	22152432
chr1	22152468
chr1	22152490
chr1	22152521
chr1	22152748
chr1	22152930
chr1	22153758
chr1	22155617
chr1	22155637
chr1	22156293
chr1	22156361
chr1	22156885
chr1	22157255
chr1	22157636
chr1	22157643
chr1	22157859
chr1	22157900
chr1	22157922
chr1	22157950
chr1	22157973
chr1	22157985
chr1	22158218
chr1	22158395
chr1	22164417
chr1	22164426
chr1	22174512
chr1	22174853
chr1	22174886
chr1	22174984
chr1	22175209
chr1	22175370
chr1	22175391
chr1	22175397
chr1	22175560
chr1	22175571
chr1	22175936
chr1	22176088
chr1	22176090
chr1	22176433
chr1	22177139
chr1	22177314
chr1	22177668
chr1	22177709
chr1	22178544
chr1	22178558
chr1	22178649
chr1	22179068
chr1	22179332
chr1	22179648
chr1	22179678
chr1	22179705
chr1	22179710
chr1	22179728
chr1	22179846
chr1	22179930
chr1	22180109
chr1	22180112
chr1	22180556
chr1	22188180
chr1	22188618
chr1	22188993
chr1	22189002
chr1	22189098
chr1	22189368
chr1	22190490
chr1	22198543
chr1	22198633
chr1	22198660
chr1	22198791
chr1	22198901
chr1	22198915
chr1	22199062
chr1	22199134
chr1	22199170
chr1	22199222
chr1	22199297
chr1	22199356
chr1	22199378
chr1	22199410
chr1	22199619
chr1	22199632
chr1	22199638
chr1	22199698
chr1	22199781
chr1	22199884
chr1	22199947
chr1	22200046
chr1	22200062
chr1	22200071
chr1	22200169
chr1	22200189
chr1	22200232
chr1	22200248
chr1	22201168
chr1	22202328
chr1	22202611
chr1	22202938
chr1	22203269
chr1	22203270
chr1	22203675
chr1	22203926
chr1	22203977
chr1	22204632
chr1	22205848
chr1	22208370
chr1	22208406
chr1	22209059
chr1	22209062
chr1	22209471
chr1	22209908
chr1	22210213
chr1	22210286
chr1	22211794
chr1	22211871
chr1	22211947
chr1	22212285
chr1	22212343
chr1	22212403
chr1	22212747
chr1	22212933
chr1	22212965
chr1	22213389
chr1	22213446
chr1	22213759
chr1	22231392
chr1	22231585
chr1	22231867
chr1	22231868
chr1	22231914
chr1	22232205
chr1	22232432
chr1	22232479
chr1	22232625
chr1	22232644
chr1	22247968
chr1	22248091
chr1	22248138
chr1	22248184
chr1	22248323
chr1	22248774
chr1	22248814
chr1	22248883
chr1	22249036
chr1	22249150
chr1	22249275
chr1	22259230
chr1	22259797
chr1	22260173
chr1	22260219
chr1	22260442
chr1	22260511
chr1	22262563
chr1	22262572
chr1	22262578
chr1	22262758
chr1	22262790
chr1	22262802
chr1	22262848
chr1	22263235
chr1	22263274
chr1	22263289
chr1	22263392
chr1	22263601
chr1	22263607
chr1	22263976
chr1	22263985
chr1	22264107
chr1	22264168
chr1	22264182
chr1	22264183
chr1	22264263
chr1	22264274
chr1	22264311
chr1	22264331
chr1	22264538
chr1	22264564
chr1	22264623
chr1	22264875
chr1	22265039
chr1	22265048
chr1	22265087
chr1	22265129
chr1	22265171
chr1	22265709
chr1	22265768
chr1	22265921
chr1	22266722
chr1	22267001
chr1	22267218
chr1	22267267
chr1	22267279
chr1	22267489
chr1	22268879
chr1	22269146
chr1	22276476
chr1	22276662
chr1	22278401
chr1	22278468
chr1	22285687
chr1	22285738
chr1	22285822
chr1	22285873
chr1	22285888
chr1	22285897
chr1	22285935
chr1	22286871
chr1	22286940
chr1	22287302
chr1	22287323
chr1	22287421
chr1	22288202
chr1	22288509
chr1	22288721
chr1	22289099
chr1	22289104
chr1	22289243
chr1	22289306
chr1	22289484
chr1	22289493
chr1	22289505
chr1	22289520
chr1	22289562
chr1	22289705
chr1	22290082
chr1	22290131
chr1	22290140
chr1	22290230
chr1	22292174
chr1	22292220
chr1	22292225
chr1	22292233
chr1	22292272
chr1	22292694
chr1	22292697
chr1	22293043
chr1	22293114
chr1	22300915
chr1	22302984
chr1	22303001
chr1	22303020
chr1	22303113
chr1	22303229
chr1	22303236
chr1	22303556
chr1	22303593
chr1	22303608
chr1	22303731
chr1	22303789
chr1	22303838
chr1	22303937
chr1	22304106
chr1	22304286
chr1	22304623
chr1	22304890
chr1	22305013
chr1	22306001
chr1	22309184
chr1	22309322
chr1	22309373
chr1	22309450
chr1	22309454
chr1	22309687
chr1	22309717
chr1	22310731
chr1	22310734
chr1	22310764
chr1	22310875
chr1	22311254
chr1	22311293
chr1	22325111
chr1	22325228
chr1	22325322
chr1	22326270
chr1	22326473
chr1	22327976
chr1	22328101
chr1	22328212
chr1	22328258
chr1	22328349
chr1	22329106
chr1	22329124
chr1	22329125
chr1	22331311
chr1	22332148
chr1	22332448
chr1	22332493
chr1	22333026
chr1	22333041
chr1	22333060
chr1	22333069
chr1	22333271
chr1	22333283
chr1	22333380
chr1	22333467
chr1	22333486
chr1	22333543
chr1	22333559
chr1	22337600
chr1	22338341
chr1	22338680
chr1	22340539
chr1	22341154
chr1	22342126
chr1	22342360
chr1	22342367
chr1	22342879
chr1	22342895
chr1	22343833
chr1	22343886
chr1	22343900
chr1	22344173
chr1	22344343
chr1	22344788
chr1	22345110
chr1	22345319
chr1	22345328
chr1	22345385
chr1	22345486
chr1	22345489
chr1	22345780
chr1	22345820
chr1	22345870
chr1	22345933
chr1	22346152
chr1	22346188
chr1	22346233
chr1	22346706
chr1	22346774
chr1	22346796
chr1	22346809
chr1	22347050
chr1	22347330
chr1	22347361
chr1	22347382
chr1	22347460
chr1	22347499
chr1	22347764
chr1	22347778
chr1	22347797
chr1	22347921
chr1	22347929
chr1	22347962
chr1	22347989
chr1	22348022
chr1	22348076
chr1	22348109
chr1	22348124
chr1	22348268
chr1	22348316
chr1	22348398
chr1	22348498
chr1	22348660
chr1	22348767
chr1	22348808
chr1	22348836
chr1	22348845
chr1	22348882
chr1	22348938
chr1	22349138
chr1	22349147
chr1	22349177
chr1	22349216
chr1	22349252
chr1	22349288
chr1	22350392
chr1	22350569
chr1	22350575
chr1	22350589
chr1	22350632
chr1	22350638
chr1	22350658
chr1	22351102
chr1	22351144
chr1	22351154
chr1	22351175
chr1	22351214
chr1	22351510
chr1	22351546
chr1	22351585
chr1	22351627
chr1	22351928
chr1	22352386
chr1	22353699
chr1	22353793
chr1	22353823
chr1	22354394
chr1	22354441
chr1	22354751
chr1	22355244
chr1	22355277
chr1	22355346
chr1	22355584
chr1	22355831
chr1	22356069
chr1	22356084
chr1	22356127
chr1	22356151
chr1	22356718
chr1	22358108
chr1	22358163
chr1	22358168
chr1	22358176
chr1	22358320
chr1	22358442
chr1	22358494
chr1	22358573
chr1	22358646
chr1	22358670
chr1	22358745
chr1	22358766
chr1	22358826
chr1	22359054
chr1	22359468
chr1	22359543
chr1	22359565
chr1	22359845
chr1	22359899
chr1	22359900
chr1	22359935
chr1	22359942
chr1	22359957
chr1	22359991
chr1	22359999
chr1	22360100
chr1	22361606
chr1	22361928
chr1	22362184
chr1	22362188
chr1	22362199
chr1	22362277
chr1	22362278
chr1	22362326
chr1	22362509
chr1	22362539
chr1	22362721
chr1	22363472
chr1	22363722
chr1	22363725
chr1	22363810
chr1	22366723
chr1	22366892
chr1	22368121
chr1	22368668
chr1	22368963
chr1	22369288
chr1	22371838
chr1	22371841
chr1	22371853
chr1	22380214
chr1	22380965
chr1	22380983
chr1	22381169
chr1	22381202
chr1	22381247
chr1	22381783
chr1	22381816
chr1	22381929
chr1	22381961
chr1	22382006
chr1	22382076
chr1	22382157
chr1	22388646
chr1	22388730
chr1	22389282
chr1	22389505
chr1	22390197
chr1	22390476
chr1	22390943
chr1	22398208
chr1	22398314
chr1	22398551
chr1	22398731
chr1	22399466
chr1	22399710
chr1	22401082
chr1	22401122
chr1	22401125
chr1	22401156
chr1	22401238
chr1	22402356
chr1	22403025
chr1	22403631
chr1	22404228
chr1	22404281
chr1	22404691
chr1	22406427
chr1	22412671
chr1	22412728
chr1	22413125
chr1	22415609
chr1	22415747
chr1	22415828
chr1	22415846
chr1	22416131
chr1	22424044
chr1	22428296
chr1	22428305
chr1	22431068
chr1	22432844
chr1	22435614
chr1	22437003
chr1	22437138
chr1	22437203
chr1	22439181
chr1	22439385
chr1	22440718
chr1	22440731
chr1	22441168
chr1	22441450
chr1	22441736
chr1	22441742
chr1	22442002
chr1	22446915
chr1	22447897
chr1	22447902
chr1	22463715
chr1	22467902
chr1	22471509
chr1	22474785
chr1	22475914
chr1	22475955
chr1	22476031
chr1	22478152
chr1	22481004
chr1	22482198
chr1	22482208
chr1	22482271
chr1	22483409
chr1	22483943
chr1	22485675
chr1	22490532
chr1	22490595
chr1	22490784
chr1	22491310
chr1	22508624
chr1	22509046
chr1	22509047
chr1	22509543
chr1	22509793
chr1	22511171
chr1	22511187
chr1	22511298
chr1	22511953
chr1	22535077
chr1	22535180
chr1	22535292
chr1	22535310
chr1	22535590
chr1	22535592
chr1	22535667
chr1	22535752
chr1	22535818
chr1	22535926
chr1	22536083
chr1	22536133
chr1	22536248
chr1	22536280
chr1	22536288
chr1	22536401
chr1	22536407
chr1	22537038
chr1	22537134
chr1	22537263
chr1	22537467
chr1	22537586
chr1	22537608
chr1	22538106
chr1	22538218
chr1	22538616
chr1	22538665
chr1	22538738
chr1	22538760
chr1	22538896
chr1	22538958
chr1	22538996
chr1	22539086
chr1	22539094
chr1	22539163
chr1	22539288
chr1	22539845
chr1	22540185
chr1	22540540
chr1	22540613
chr1	22540614
chr1	22540772
chr1	22542635
chr1	22542793
chr1	22542820
chr1	22542948
chr1	22542951
chr1	22543139
chr1	22543304
chr1	22543390
chr1	22543663
chr1	22543675
chr1	22543848
chr1	22544206
chr1	22544279
chr1	22544307
chr1	22544383
chr1	22544393
chr1	22544397
chr1	22544408
chr1	22544427
chr1	22544505
chr1	22544519
chr1	22544535
chr1	22544602
chr1	22549780
chr1	22552122
chr1	22552167
chr1	22552220
chr1	22552461
chr1	22552977
chr1	22553456
chr1	22553874
chr1	22553875
chr1	22553876
chr1	22558803
chr1	22559447
chr1	22560168
chr1	22564599
chr1	22564698
chr1	22564748
chr1	22565190
chr1	22565432
chr1	22565802
chr1	22568347
chr1	22569117
chr1	22569626
chr1	22570423
chr1	22570983
chr1	22572791
chr1	22572821
chr1	22573129
chr1	22573235
chr1	22573244
chr1	22574171
chr1	22574596
chr1	22574646
chr1	22574674
chr1	22574906
chr1	22575106
chr1	22575323
chr1	22575418
chr1	22575425
chr1	22575446
chr1	22575472
chr1	22580378
chr1	22582105
chr1	22582309
chr1	22582449
chr1	22582457
chr1	22583061
chr1	22583986
chr1	22584362
chr1	22584373
chr1	22586032
chr1	22587142
chr1	22587187
chr1	22587190
chr1	22587196
chr1	22587990
chr1	22588294
chr1	22588505
chr1	22588565
chr1	22588764
chr1	22593951
chr1	22593980
chr1	22594050
chr1	22594256
chr1	22594517
chr1	22594585
chr1	22594905
chr1	22595022
chr1	22595162
chr1	22595255
chr1	22603173
chr1	22603196
chr1	22603333
chr1	22603660
chr1	22603684
chr1	22603735
chr1	22603952
chr1	22603998
chr1	22604048
chr1	22604067
chr1	22604467
chr1	22604657
chr1	22605323
chr1	22607604
chr1	22615298
chr1	22628351
chr1	22628448
chr1	22628543
chr1	22628562
chr1	22628587
chr1	22628657
chr1	22628689
chr1	22628729
chr1	22628747
chr1	22628750
chr1	22628756
chr1	22628973
chr1	22629115
chr1	22629659
chr1	22629792
chr1	22629793
chr1	22629859
chr1	22629911
chr1	22629922
chr1	22629925
chr1	22629961
chr1	22634215
chr1	22634299
chr1	22634530
chr1	22634563
chr1	22634611
chr1	22634641
chr1	22634651
chr1	22634935
chr1	22635024
chr1	22635041
chr1	22635049
chr1	22635103
chr1	22635148
chr1	22635151
chr1	22635193
chr1	22635427
chr1	22635473
chr1	22640147
chr1	22641649
chr1	22641710
chr1	22646148
chr1	22646528
chr1	22649406
chr1	22649606
chr1	22653172
chr1	22654520
chr1	22656573
chr1	22657156
chr1	22659243
chr1	22659260
chr1	22659579
chr1	22660465
chr1	22660650
chr1	22660879
chr1	22660954
chr1	22661001
chr1	22661025
chr1	22661052
chr1	22661289
chr1	22661310
chr1	22663030
chr1	22664288
chr1	22664405
chr1	22664420
chr1	22664643
chr1	22665018
chr1	22665076
chr1	22665389
chr1	22665643
chr1	22665650
chr1	22665839
chr1	22666918
chr1	22667019
chr1	22667591
chr1	22667773
chr1	22667907
chr1	22669481
chr1	22669510
chr1	22669612
chr1	22669674
chr1	22669854
chr1	22669989
chr1	22670151
chr1	22670885
chr1	22672074
chr1	22672423
chr1	22672598
chr1	22674209
chr1	22675329
chr1	22676009
chr1	22676132
chr1	22676203
chr1	22676463
chr1	22676492
chr1	22676657
chr1	22676887
chr1	22677383
chr1	22677528
chr1	22677536
chr1	22678155
chr1	22678161
chr1	22678241
chr1	22678334
chr1	22678463
chr1	22678464
chr1	22678586
chr1	22679237
chr1	22679287
chr1	22685096
chr1	22685537
chr1	22685645
chr1	22685956
chr1	22686299
chr1	22687362
chr1	22687885
chr1	22687930
chr1	22688095
chr1	22688853
chr1	22689753
chr1	22690249
chr1	22690417
chr1	22691762
chr1	22691829
chr1	22692350
chr1	22692639
chr1	22692968
chr1	22693025
chr1	22693230
chr1	22693234
chr1	22693537
chr1	22693600
chr1	22695552
chr1	22695558
chr1	22695913
chr1	22697429
chr1	22698955
chr1	22699880
chr1	22699954
chr1	22700021
chr1	22700029
chr1	22700093
chr1	22700130
chr1	22700232
chr1	22700271
chr1	22700313
chr1	22700393
chr1	22700414
chr1	22700518
chr1	22700567
chr1	22700685
chr1	22701080
chr1	22701581
chr1	22701689
chr1	22701718
chr1	22701778
chr1	22701811
chr1	22701855
chr1	22701862
chr1	22701914
chr1	22702110
chr1	22705033
chr1	22705142
chr1	22705704
chr1	22708947
chr1	22709104
chr1	22709175
chr1	22709383
chr1	22709401
chr1	22709554
chr1	22709707
chr1	22709757
chr1	22709769
chr1	22710028
chr1	22710183
chr1	22710371
chr1	22710412
chr1	22710493
chr1	22710654
chr1	22711046
chr1	22711055
chr1	22718690
chr1	22718713
chr1	22718715
chr1	22719336
chr1	22719462
chr1	22721500
chr1	22721841
chr1	22722785
chr1	22737640
chr1	22737766
chr1	22738031
chr1	22738436
chr1	22738924
chr1	22738978
chr1	22739038
chr1	22739113
chr1	22739119
chr1	22739125
chr1	22739146
chr1	22739173
chr1	22739238
chr1	22746704
chr1	22746909
chr1	22747189
chr1	22747190
chr1	22747261
chr1	22747268
chr1	22747520
chr1	22747617
chr1	22747668
chr1	22747818
chr1	22747881
chr1	22748028
chr1	22748223
chr1	22748351
chr1	22748613
chr1	22748770
chr1	22748814
chr1	22749101
chr1	22770164
chr1	22770168
chr1	22770187
chr1	22770203
chr1	22770204
chr1	22770251
chr1	22770333
chr1	22770519
chr1	22770657
chr1	22770667
chr1	22770897
chr1	22771062
chr1	22771065
chr1	22771098
chr1	22771104
chr1	22771107
chr1	22771200
chr1	22771362
chr1	22771694
chr1	22771843
chr1	22772039
chr1	22772587
chr1	22782915
chr1	22782987
chr1	22783568
chr1	22784155
chr1	22784163
chr1	22784455
chr1	22784528
chr1	22785456
chr1	22785500
chr1	22785649
chr1	22785786
chr1	22786253
chr1	22786368
chr1	22786806
chr1	22793428
chr1	22793471
chr1	22793724
chr1	22793738
chr1	22793739
chr1	22793807
chr1	22793819
chr1	22794214
chr1	22794242
chr1	22794353
chr1	22794379
chr1	22794456
chr1	22794482
chr1	22794556
chr1	22794591
chr1	22798287
chr1	22798347
chr1	22798452
chr1	22798482
chr1	22798629
chr1	22798641
chr1	22798749
chr1	22798845
chr1	22798854
chr1	22798899
chr1	22798964
chr1	22798995
chr1	22799148
chr1	22799534
chr1	22800355
chr1	22800382
chr1	22800493
chr1	22800499
chr1	22800745
chr1	22800858
chr1	22801025
chr1	22810630
chr1	22812530
chr1	22812702
chr1	22812739
chr1	22813120
chr1	22813180
chr1	22813602
chr1	22814587
chr1	22815842
chr1	22815843
chr1	22824627
chr1	22824659
chr1	22824662
chr1	22824718
chr1	22824734
chr1	22824794
chr1	22824832
chr1	22824856
chr1	22824997
chr1	22825138
chr1	22825519
chr1	22825603
chr1	22825618
chr1	22825870
chr1	22826076
chr1	22826172
chr1	22826189
chr1	22826192
chr1	22826231
chr1	22826412
chr1	22826490
chr1	22826506
chr1	22826519
chr1	22826656
chr1	22826692
chr1	22826700
chr1	22826701
chr1	22826757
chr1	22830067
chr1	22830125
chr1	22831159
chr1	22831882
chr1	22831927
chr1	22832796
chr1	22839719
chr1	22839723
chr1	22839738
chr1	22839773
chr1	22856295
chr1	22856313
chr1	22856370
chr1	22856496
chr1	22857748
chr1	22857904
chr1	22859128
chr1	22860303
chr1	22860994
chr1	22861649
chr1	22865231
chr1	22865365
chr1	22865425
chr1	22865510
chr1	22865542
chr1	22865554
chr1	22865604
chr1	22865686
chr1	22865725
chr1	22865731
chr1	22865744
chr1	22865800
chr1	22865804
chr1	22865910
chr1	22865944
chr1	22866085
chr1	22866100
chr1	22866151
chr1	22866199
chr1	22866277
chr1	22866298
chr1	22866400
chr1	22866453
chr1	22866507
chr1	22868183
chr1	22868239
chr1	22868708
chr1	22869158
chr1	22869459
chr1	22870409
chr1	22870540
chr1	22871110
chr1	22871185
chr1	22871206
chr1	22882310
chr1	22882332
chr1	22882939
chr1	22883603
chr1	22884266
chr1	22903559
chr1	22903757
chr1	22904723
chr1	22904801
chr1	22905496
chr1	22906041
chr1	22906510
chr1	22906994
chr1	22907105
chr1	22907547
chr1	22908295
chr1	22908698
chr1	22908928
chr1	22908929
chr1	22909196
chr1	22909358
chr1	22909426
chr1	22909430
chr1	22909431
chr1	22911794
chr1	22912154
chr1	22912253
chr1	22912262
chr1	22915837
chr1	22915868
chr1	22916134
chr1	22916168
chr1	22916309
chr1	22916311
chr1	22916320
chr1	22916698
chr1	22916725
chr1	22917076
chr1	22917084
chr1	22917120
chr1	22917143
chr1	22917214
chr1	22917303
chr1	22920262
chr1	22922033
chr1	22931956
chr1	22932034
chr1	22932325
chr1	22932999
chr1	22933023
chr1	22933054
chr1	22933063
chr1	22933066
chr1	22933392
chr1	22933405
chr1	22933554
chr1	22933903
chr1	22933918
chr1	22933924
chr1	22933954
chr1	22933972
chr1	22934265
chr1	22934281
chr1	22934309
chr1	22934332
chr1	22934334
chr1	22934956
chr1	22938478
chr1	22949119
chr1	22950100
chr1	22958601
chr1	22958637
chr1	22958736
chr1	22958861
chr1	22958866
chr1	22959054
chr1	22959082
chr1	22959156
chr1	22959630
chr1	22960305
chr1	22960452
chr1	22960674
chr1	22960862
chr1	22960878
chr1	22960986
chr1	22961174
chr1	22961279
chr1	22961305
chr1	22961610
chr1	22961722
chr1	22962429
chr1	22962532
chr1	22963015
chr1	22963019
chr1	22963287
chr1	22963421
chr1	22963442
chr1	22963882
chr1	22964012
chr1	22964548
chr1	22964683
chr1	22964772
chr1	22964959
chr1	22965188
chr1	22965261
chr1	22965829
chr1	22966587
chr1	22967059
chr1	22967080
chr1	22968841
chr1	22968911
chr1	22970227
chr1	22970245
chr1	22975679
chr1	22975709
chr1	22975768
chr1	22975771
chr1	22975777
chr1	22975863
chr1	22975905
chr1	22975989
chr1	22976113
chr1	22976136
chr1	22976142
chr1	22976160
chr1	22976211
chr1	22976265
chr1	22976271
chr1	22976430
chr1	22976682
chr1	22976706
chr1	22976718
chr1	22976757
chr1	22976760
chr1	22976895
chr1	22977014
chr1	22977040
chr1	22977187
chr1	22977197
chr1	22977221
chr1	22977241
chr1	22977468
chr1	22977534
chr1	22982294
chr1	22983197
chr1	22983344
chr1	22983536
chr1	22983714
chr1	22983774
chr1	22983819
chr1	22994767
chr1	22995444
chr1	22995474
chr1	22995498
chr1	22995878
chr1	22996138
chr1	22996539
chr1	22996605
chr1	22996941
chr1	22997129
chr1	22997343
chr1	22997375
chr1	22997513
chr1	22997931
chr1	22997940
chr1	22998088
chr1	22998324
chr1	22998528
chr1	22998897
chr1	22999244
chr1	22999356
chr1	22999464
chr1	22999470
chr1	23010042
chr1	23010329
chr1	23010738
chr1	23010908
chr1	23010912
chr1	23010933
chr1	23011031
chr1	23012331
chr1	23012397
chr1	23012415
chr1	23012451
chr1	23012673
chr1	23013177
chr1	23013309
chr1	23013363
chr1	23017100
chr1	23017200
chr1	23017222
chr1	23017265
chr1	23017579
chr1	23017912
chr1	23018139
chr1	23026966
chr1	23027010
chr1	23027297
chr1	23027969
chr1	23028208
chr1	23028679
chr1	23033046
chr1	23033445
chr1	23033467
chr1	23034219
chr1	23034221
chr1	23034395
chr1	23034421
chr1	23034474
chr1	23036015
chr1	23036362
chr1	23036987
chr1	23038009
chr1	23038029
chr1	23038814
chr1	23038831
chr1	23039098
chr1	23046894
chr1	23047057
chr1	23048821
chr1	23048991
chr1	23049150
chr1	23049228
chr1	23049545
chr1	23049554
chr1	23049581
chr1	23049750
chr1	23049828
chr1	23049837
chr1	23049945
chr1	23049993
chr1	23050006
chr1	23050841
chr1	23050865
chr1	23056607
chr1	23056622
chr1	23056708
chr1	23056772
chr1	23057524
chr1	23057530
chr1	23057688
chr1	23072803
chr1	23100211
chr1	23100503
chr1	23100522
chr1	23100563
chr1	23100737
chr1	23100755
chr1	23103020
chr1	23103281
chr1	23104077
chr1	23104114
chr1	23104595
chr1	23106358
chr1	23108083
chr1	23109163
chr1	23109221
chr1	23109285
chr1	23109310
chr1	23136479
chr1	23136770
chr1	23136827
chr1	23136890
chr1	23137010
chr1	23137013
chr1	23137052
chr1	23146730
chr1	23146733
chr1	23170920
chr1	23171041
chr1	23171404
chr1	23171425
chr1	23171481
chr1	23171590
chr1	23171794
chr1	23173191
chr1	23173550
chr1	23173697
chr1	23178085
chr1	23180427
chr1	23180428
chr1	23180585
chr1	23180599
chr1	23180623
chr1	23180800
chr1	23180827
chr1	23180863
chr1	23181406
chr1	23181421
chr1	23181443
chr1	23181561
chr1	23181569
chr1	23181609
chr1	23181696
chr1	23182010
chr1	23182272
chr1	23192292
chr1	23192639
chr1	23192986
chr1	23193070
chr1	23193606
chr1	23194202
chr1	23194244
chr1	23194570
chr1	23194572
chr1	23194596
chr1	23194723
chr1	23194776
chr1	23204013
chr1	23204906
chr1	23205047
chr1	23205064
chr1	23206050
chr1	23206057
chr1	23206114
chr1	23206138
chr1	23206315
chr1	23206396
chr1	23206411
chr1	23206459
chr1	23206636
chr1	23206639
chr1	23207081
chr1	23207267
chr1	23207273
chr1	23208200
chr1	23208388
chr1	23208390
chr1	23208437
chr1	23208651
chr1	23208686
chr1	23208745
chr1	23208750
chr1	23208781
chr1	23208889
chr1	23209156
chr1	23209198
chr1	23209283
chr1	23209320
chr1	23223836
chr1	23223918
chr1	23224397
chr1	23224399
chr1	23224509
chr1	23224644
chr1	23225355
chr1	23226057
chr1	23226307
chr1	23227615
chr1	23227676
chr1	23227885
chr1	23228110
chr1	23228222
chr1	23228224
chr1	23228785
chr1	23228795
chr1	23229789
chr1	23229818
chr1	23230249
chr1	23231244
chr1	23231286
chr1	23231349
chr1	23231352
chr1	23231394
chr1	23231400
chr1	23231406
chr1	23231982
chr1	23233257
chr1	23233979
chr1	23234136
chr1	23234142
chr1	23234247
chr1	23234552
chr1	23234594
chr1	23234609
chr1	23234707
chr1	23234774
chr1	23235029
chr1	23235122
chr1	23235269
chr1	23235336
chr1	23235487
chr1	23235497
chr1	23235527
chr1	23235589
chr1	23235599
chr1	23235650
chr1	23235656
chr1	23235700
chr1	23235788
chr1	23242399
chr1	23245983
chr1	23246024
chr1	23246139
chr1	23246190
chr1	23246419
chr1	23249223
chr1	23250545
chr1	23251037
chr1	23252409
chr1	23252420
chr1	23252446
chr1	23252476
chr1	23252530
chr1	23253618
chr1	23257800
chr1	23258035
chr1	23258340
chr1	23258382
chr1	23258458
chr1	23258611
chr1	23258779
chr1	23258847
chr1	23258865
chr1	23259341
chr1	23259916
chr1	23259960
chr1	23260485
chr1	23260560
chr1	23260569
chr1	23260596
chr1	23260608
chr1	23260689
chr1	23261049
chr1	23261536
chr1	23261827
chr1	23263503
chr1	23264627
chr1	23264724
chr1	23265166
chr1	23265460
chr1	23266366
chr1	23266594
chr1	23272170
chr1	23272173
chr1	23272263
chr1	23272340
chr1	23272686
chr1	23272701
chr1	23272843
chr1	23272858
chr1	23272984
chr1	23273086
chr1	23273274
chr1	23273356
chr1	23274044
chr1	23274061
chr1	23274168
chr1	23274544
chr1	23274627
chr1	23274907
chr1	23276150
chr1	23276391
chr1	23276407
chr1	23284289
chr1	23284360
chr1	23284532
chr1	23284622
chr1	23284718
chr1	23284761
chr1	23286065
chr1	23286194
chr1	23286227
chr1	23286308
chr1	23286311
chr1	23286329
chr1	23292064
chr1	23292940
chr1	23293356
chr1	23293620
chr1	23293634
chr1	23295473
chr1	23300607
chr1	23301930
chr1	23303221
chr1	23303404
chr1	23303443
chr1	23304502
chr1	23304548
chr1	23305830
chr1	23307309
chr1	23308421
chr1	23309290
chr1	23315497
chr1	23315542
chr1	23315546
chr1	23316768
chr1	23317398
chr1	23318749
chr1	23319425
chr1	23319485
chr1	23320164
chr1	23320393
chr1	23323374
chr1	23323386
chr1	23323584
chr1	23323612
chr1	23323630
chr1	23323642
chr1	23323660
chr1	23323906
chr1	23323914
chr1	23323915
chr1	23324418
chr1	23324493
chr1	23324590
chr1	23324628
chr1	23324629
chr1	23324697
chr1	23324736
chr1	23324746
chr1	23324752
chr1	23324783
chr1	23325116
chr1	23325127
chr1	23325133
chr1	23325298
chr1	23325335
chr1	23325412
chr1	23325425
chr1	23325427
chr1	23325469
chr1	23325571
chr1	23325694
chr1	23325757
chr1	23325760
chr1	23337611
chr1	23337615
chr1	23340282
chr1	23340409
chr1	23340621
chr1	23342609
chr1	23342621
chr1	23342683
chr1	23342710
chr1	23342848
chr1	23343547
chr1	23343914
chr1	23347919
chr1	23348032
chr1	23348047
chr1	23348074
chr1	23348188
chr1	23348291
chr1	23348336
chr1	23348865
chr1	23349369
chr1	23349501
chr1	23349615
chr1	23350206
chr1	23350779
chr1	23355054
chr1	23355924
chr1	23356182
chr1	23357209
chr1	23357251
chr1	23357266
chr1	23357646
chr1	23357647
chr1	23358444
chr1	23358782
chr1	23359098
chr1	23359129
chr1	23359512
chr1	23359675
chr1	23359975
chr1	23360048
chr1	23360258
chr1	23360344
chr1	23360816
chr1	23361112
chr1	23361149
chr1	23367394
chr1	23367421
chr1	23368692
chr1	23371457
chr1	23371577
chr1	23371605
chr1	23371650
chr1	23371687
chr1	23371707
chr1	23371761
chr1	23376130
chr1	23377241
chr1	23377282
chr1	23385444
chr1	23385453
chr1	23386203
chr1	23386204
chr1	23386300
chr1	23389518
chr1	23389574
chr1	23389578
chr1	23390255
chr1	23390377
chr1	23390399
chr1	23390492
chr1	23390676
chr1	23390924
chr1	23391219
chr1	23391345
chr1	23391475
chr1	23391520
chr1	23391523
chr1	23391634
chr1	23391791
chr1	23391826
chr1	23391904
chr1	23391960
chr1	23392201
chr1	23392463
chr1	23392576
chr1	23392810
chr1	23399481
chr1	23399486
chr1	23400876
chr1	23400907
chr1	23401551
chr1	23401588
chr1	23403923
chr1	23403928
chr1	23404893
chr1	23404930
chr1	23404956
chr1	23405138
chr1	23405296
chr1	23405638
chr1	23405671
chr1	23405685
chr1	23405912
chr1	23406109
chr1	23406317
chr1	23406361
chr1	23406501
chr1	23406872
chr1	23406884
chr1	23406967
chr1	23407154
chr1	23407158
chr1	23407736
chr1	23407994
chr1	23408001
chr1	23408583
chr1	23408961
chr1	23409183
chr1	23409265
chr1	23409860
chr1	23410083
chr1	23410600
chr1	23410615
chr1	23410657
chr1	23410975
chr1	23412762
chr1	23412991
chr1	23413024
chr1	23413455
chr1	23413462
chr1	23413530
chr1	23413531
chr1	23414824
chr1	23414895
chr1	23415766
chr1	23420161
chr1	23420223
chr1	23420225
chr1	23420271
chr1	23421875
chr1	23421885
chr1	23421948
chr1	23422014
chr1	23422033
chr1	23422122
chr1	23422211
chr1	23422224
chr1	23422369
chr1	23422372
chr1	23422836
chr1	23423273
chr1	23423435
chr1	23423526
chr1	23423667
chr1	23423760
chr1	23423763
chr1	23425699
chr1	23425871
chr1	23425924
chr1	23426366
chr1	23426597
chr1	23426637
chr1	23426822
chr1	23427518
chr1	23427569
chr1	23427820
chr1	23428111
chr1	23428120
chr1	23428162
chr1	23428168
chr1	23428260
chr1	23428327
chr1	23428330
chr1	23428366
chr1	23428399
chr1	23428435
chr1	23428829
chr1	23429021
chr1	23429070
chr1	23431957
chr1	23432118
chr1	23443515
chr1	23443560
chr1	23444107
chr1	23444113
chr1	23444156
chr1	23444831
chr1	23444929
chr1	23445197
chr1	23445418
chr1	23447270
chr1	23447276
chr1	23447797
chr1	23449809
chr1	23451981
chr1	23452026
chr1	23456207
chr1	23456281
chr1	23456297
chr1	23456300
chr1	23456314
chr1	23456324
chr1	23456368
chr1	23456423
chr1	23456438
chr1	23456482
chr1	23456547
chr1	23456552
chr1	23456556
chr1	23456586
chr1	23456636
chr1	23456723
chr1	23456724
chr1	23456806
chr1	23456809
chr1	23456951
chr1	23457461
chr1	23458618
chr1	23459485
chr1	23463518
chr1	23467230
chr1	23468963
chr1	23469001
chr1	23471150
chr1	23471169
chr1	23471237
chr1	23471755
chr1	23473280
chr1	23473611
chr1	23482128
chr1	23482499
chr1	23482619
chr1	23483143
chr1	23483144
chr1	23485100
chr1	23485863
chr1	23488458
chr1	23488974
chr1	23489821
chr1	23493930
chr1	23493959
chr1	23503352
chr1	23504812
chr1	23504817
chr1	23506240
chr1	23506249
chr1	23509118
chr1	23509385
chr1	23515946
chr1	23516448
chr1	23516846
chr1	23517242
chr1	23517299
chr1	23517512
chr1	23518120
chr1	23522961
chr1	23523094
chr1	23523601
chr1	23523649
chr1	23524058
chr1	23524118
chr1	23524978
chr1	23525119
chr1	23525156
chr1	23525873
chr1	23526051
chr1	23526056
chr1	23526658
chr1	23527735
chr1	23528286
chr1	23530664
chr1	23530889
chr1	23535906
chr1	23536073
chr1	23536320
chr1	23536590
chr1	23536629
chr1	23536828
chr1	23537025
chr1	23537319
chr1	23537550
chr1	23537676
chr1	23538402
chr1	23538422
chr1	23538468
chr1	23538501
chr1	23538735
chr1	23538774
chr1	23538974
chr1	23538989
chr1	23539033
chr1	23539034
chr1	23539037
chr1	23539564
chr1	23539799
chr1	23539816
chr1	23539911
chr1	23539913
chr1	23541042
chr1	23541194
chr1	23541377
chr1	23541556
chr1	23541739
chr1	23541742
chr1	23541873
chr1	23541893
chr1	23545732
chr1	23546219
chr1	23546530
chr1	23549786
chr1	23550022
chr1	23551250
chr1	23552331
chr1	23552568
chr1	23553152
chr1	23555779
chr1	23557035
chr1	23564230
chr1	23565061
chr1	23565098
chr1	23565272
chr1	23567020
chr1	23567445
chr1	23568014
chr1	23568834
chr1	23568912
chr1	23569419
chr1	23569888
chr1	23570133
chr1	23570376
chr1	23570434
chr1	23575151
chr1	23578956
chr1	23578978
chr1	23587302
chr1	23587435
chr1	23587578
chr1	23589598
chr1	23589628
chr1	23590433
chr1	23591034
chr1	23591038
chr1	23591685
chr1	23593773
chr1	23593807
chr1	23594679
chr1	23595037
chr1	23595132
chr1	23595159
chr1	23595160
chr1	23595651
chr1	23603939
chr1	23603990
chr1	23604355
chr1	23604431
chr1	23606575
chr1	23607829
chr1	23608408
chr1	23608878
chr1	23609327
chr1	23609947
chr1	23614655
chr1	23615184
chr1	23617388
chr1	23617496
chr1	23617523
chr1	23618175
chr1	23620288
chr1	23620394
chr1	23624852
chr1	23626355
chr1	23626618
chr1	23626637
chr1	23636046
chr1	23636803
chr1	23637092
chr1	23642153
chr1	23644970
chr1	23644999
chr1	23645520
chr1	23646145
chr1	23646234
chr1	23646737
chr1	23646907
chr1	23647280
chr1	23647688
chr1	23647947
chr1	23647948
chr1	23647998
chr1	23648087
chr1	23648308
chr1	23648417
chr1	23649301
chr1	23651119
chr1	23651299
chr1	23652335
chr1	23652460
chr1	23652846
chr1	23653178
chr1	23653184
chr1	23654076
chr1	23657579
chr1	23659517
chr1	23663812
chr1	23664264
chr1	23664842
chr1	23664970
chr1	23666957
chr1	23668915
chr1	23673082
chr1	23682662
chr1	23682754
chr1	23683387
chr1	23683432
chr1	23683958
chr1	23684000
chr1	23685346
chr1	23686086
chr1	23686891
chr1	23686915
chr1	23686955
chr1	23687089
chr1	23687102
chr1	23687116
chr1	23689716
chr1	23696867
chr1	23700073
chr1	23700547
chr1	23701241
chr1	23702450
chr1	23717047
chr1	23717088
chr1	23717097
chr1	23717227
chr1	23717241
chr1	23717259
chr1	23717392
chr1	23717799
chr1	23717844
chr1	23717847
chr1	23717850
chr1	23718301
chr1	23718317
chr1	23718457
chr1	23718489
chr1	23718748
chr1	23718811
chr1	23718813
chr1	23719035
chr1	23730205
chr1	23730270
chr1	23730277
chr1	23730332
chr1	23730349
chr1	23730501
chr1	23731224
chr1	23731472
chr1	23731681
chr1	23731711
chr1	23732061
chr1	23732194
chr1	23732270
chr1	23732327
chr1	23732578
chr1	23732594
chr1	23732863
chr1	23733004
chr1	23733019
chr1	23733187
chr1	23733486
chr1	23733492
chr1	23733597
chr1	23733600
chr1	23733755
chr1	23733759
chr1	23739085
chr1	23739389
chr1	23739594
chr1	23739710
chr1	23739724
chr1	23739867
chr1	23740044
chr1	23740217
chr1	23740996
chr1	23741151
chr1	23741804
chr1	23742562
chr1	23750830
chr1	23750834
chr1	23751757
chr1	23751927
chr1	23751935
chr1	23752073
chr1	23758988
chr1	23759057
chr1	23759137
chr1	23759138
chr1	23759707
chr1	23762485
chr1	23762601
chr1	23762703
chr1	23762706
chr1	23762980
chr1	23763055
chr1	23763473
chr1	23763890
chr1	23763938
chr1	23764447
chr1	23765033
chr1	23765121
chr1	23765255
chr1	23765564
chr1	23765795
chr1	23770757
chr1	23774387
chr1	23776260
chr1	23776922
chr1	23778675
chr1	23778676
chr1	23778681
chr1	23778816
chr1	23778864
chr1	23778870
chr1	23778887
chr1	23778967
chr1	23779023
chr1	23779068
chr1	23779092
chr1	23779101
chr1	23779140
chr1	23779191
chr1	23779279
chr1	23779283
chr1	23779331
chr1	23785367
chr1	23785457
chr1	23785472
chr1	23785487
chr1	23785498
chr1	23785550
chr1	23785634
chr1	23785643
chr1	23785658
chr1	23785664
chr1	23785709
chr1	23785806
chr1	23785835
chr1	23785838
chr1	23785847
chr1	23785943
chr1	23786096
chr1	23786112
chr1	23786155
chr1	23786204
chr1	23786207
chr1	23786234
chr1	23786345
chr1	23786492
chr1	23792123
chr1	23792139
chr1	23792329
chr1	23793675
chr1	23795210
chr1	23795231
chr1	23796283
chr1	23796797
chr1	23796802
chr1	23797196
chr1	23797463
chr1	23800700
chr1	23803905
chr1	23804096
chr1	23805941
chr1	23806861
chr1	23807046
chr1	23809719
chr1	23809763
chr1	23811979
chr1	23812310
chr1	23812438
chr1	23812535
chr1	23812600
chr1	23821781
chr1	23821789
chr1	23822198
chr1	23822621
chr1	23822891
chr1	23823095
chr1	23823336
chr1	23823572
chr1	23823768
chr1	23824084
chr1	23824595
chr1	23824652
chr1	23824655
chr1	23824887
chr1	23824908
chr1	23824917
chr1	23825564
chr1	23825621
chr1	23825675
chr1	23825705
chr1	23825729
chr1	23825750
chr1	23825819
chr1	23825825
chr1	23825885
chr1	23826008
chr1	23826074
chr1	23826209
chr1	23826266
chr1	23826296
chr1	23826359
chr1	23826362
chr1	23826366
chr1	23826449
chr1	23826461
chr1	23829052
chr1	23831216
chr1	23831231
chr1	23831659
chr1	23831722
chr1	23832368
chr1	23832587
chr1	23833178
chr1	23833783
chr1	23833904
chr1	23834136
chr1	23834158
chr1	23834400
chr1	23834402
chr1	23834492
chr1	23834515
chr1	23834560
chr1	23834591
chr1	23834753
chr1	23834765
chr1	23834783
chr1	23834930
chr1	23834933
chr1	23835169
chr1	23835181
chr1	23835433
chr1	23835502
chr1	23837132
chr1	23837851
chr1	23837881
chr1	23840957
chr1	23841081
chr1	23841461
chr1	23841464
chr1	23841490
chr1	23841661
chr1	23841746
chr1	23841806
chr1	23841839
chr1	23841852
chr1	23842014
chr1	23842020
chr1	23842035
chr1	23842325
chr1	23842498
chr1	23842684
chr1	23842710
chr1	23842861
chr1	23843018
chr1	23843167
chr1	23844665
chr1	23845043
chr1	23845100
chr1	23845422
chr1	23845433
chr1	23845816
chr1	23845833
chr1	23845958
chr1	23846006
chr1	23846014
chr1	23846120
chr1	23846174
chr1	23846382
chr1	23846828
chr1	23846990
chr1	23847125
chr1	23848101
chr1	23848751
chr1	23848950
chr1	23849037
chr1	23849090
chr1	23849605
chr1	23849691
chr1	23849897
chr1	23850708
chr1	23850871
chr1	23851144
chr1	23851466
chr1	23853203
chr1	23853587
chr1	23853591
chr1	23853592
chr1	23853904
chr1	23853916
chr1	23854075
chr1	23854112
chr1	23854144
chr1	23854152
chr1	23854186
chr1	23854230
chr1	23854234
chr1	23854462
chr1	23854492
chr1	23854526
chr1	23854672
chr1	23854861
chr1	23854875
chr1	23854925
chr1	23854985
chr1	23855308
chr1	23863499
chr1	23863923
chr1	23864804
chr1	23865339
chr1	23865735
chr1	23865974
chr1	23866192
chr1	23866431
chr1	23866725
chr1	23866751
chr1	23867269
chr1	23867691
chr1	23868234
chr1	23868518
chr1	23869610
chr1	23870940
chr1	23871197
chr1	23871437
chr1	23871597
chr1	23871609
chr1	23871693
chr1	23871714
chr1	23871969
chr1	23872078
chr1	23872166
chr1	23872234
chr1	23872741
chr1	23872864
chr1	23873879
chr1	23878165
chr1	23881811
chr1	23882599
chr1	23882947
chr1	23886295
chr1	23886424
chr1	23886445
chr1	23886834
chr1	23886971
chr1	23890874
chr1	23891188
chr1	23901065
chr1	23901712
chr1	23901818
chr1	23902095
chr1	23911828
chr1	23911834
chr1	23914531
chr1	23914643
chr1	23928040
chr1	23933608
chr1	23935800
chr1	23936412
chr1	23939651
chr1	23939759
chr1	23941668
chr1	23942152
chr1	23942499
chr1	23943679
chr1	23944819
chr1	23945377
chr1	23952154
chr1	23952285
chr1	23952339
chr1	23952360
chr1	23952453
chr1	23953681
chr1	23954884
chr1	23954898
chr1	23954958
chr1	23955298
chr1	23955302
chr1	23955457
chr1	23957988
chr1	23959952
chr1	23960390
chr1	23960648
chr1	23966871
chr1	23967194
chr1	23967396
chr1	23967537
chr1	23967633
chr1	23967746
chr1	23967834
chr1	23970618
chr1	23972594
chr1	23973466
chr1	23973610
chr1	23974058
chr1	23974358
chr1	23974685
chr1	23976103
chr1	23976412
chr1	23977793
chr1	23983725
chr1	23984776
chr1	23984868
chr1	23987496
chr1	23988144
chr1	23998560
chr1	23998861
chr1	24000934
chr1	24001720
chr1	24019587
chr1	24021345
chr1	24022560
chr1	24022587
chr1	24022815
chr1	24022972
chr1	24023002
chr1	24023008
chr1	24023586
chr1	24023611
chr1	24023749
chr1	24023791
chr1	24024139
chr1	24024541
chr1	24024577
chr1	24025082
chr1	24025125
chr1	24025239
chr1	24025242
chr1	24025762
chr1	24025800
chr1	24025965
chr1	24026313
chr1	24026384
chr1	24029003
chr1	24029048
chr1	24029067
chr1	24029069
chr1	24029300
chr1	24029356
chr1	24029357
chr1	24029420
chr1	24029437
chr1	24029543
chr1	24029558
chr1	24029648
chr1	24029738
chr1	24029940
chr1	24030009
chr1	24030010
chr1	24030159
chr1	24030180
chr1	24030261
chr1	24030387
chr1	24030693
chr1	24030694
chr1	24030696
chr1	24036076
chr1	24036136
chr1	24037189
chr1	24037313
chr1	24040000
chr1	24044604
chr1	24044642
chr1	24044662
chr1	24044826
chr1	24044832
chr1	24044881
chr1	24044907
chr1	24045192
chr1	24045252
chr1	24045294
chr1	24045402
chr1	24045408
chr1	24045417
chr1	24045899
chr1	24045961
chr1	24046001
chr1	24046067
chr1	24046495
chr1	24046575
chr1	24046579
chr1	24046589
chr1	24046642
chr1	24046647
chr1	24046696
chr1	24046780
chr1	24046837
chr1	24047025
chr1	24047100
chr1	24047118
chr1	24047145
chr1	24047178
chr1	24047190
chr1	24047214
chr1	24047232
chr1	24047391
chr1	24047439
chr1	24047448
chr1	24047460
chr1	24047496
chr1	24047681
chr1	24047825
chr1	24048020
chr1	24048187
chr1	24048211
chr1	24048375
chr1	24048388
chr1	24048463
chr1	24048497
chr1	24048599
chr1	24048688
chr1	24050034
chr1	24050218
chr1	24050236
chr1	24051135
chr1	24051718
chr1	24052428
chr1	24052463
chr1	24052566
chr1	24052591
chr1	24052618
chr1	24052622
chr1	24052644
chr1	24052651
chr1	24052702
chr1	24052742
chr1	24052930
chr1	24053490
chr1	24053612
chr1	24054457
chr1	24054529
chr1	24054886
chr1	24054887
chr1	24055016
chr1	24055064
chr1	24055073
chr1	24055364
chr1	24055626
chr1	24055636
chr1	24055988
chr1	24056054
chr1	24056084
chr1	24056096
chr1	24064998
chr1	24065490
chr1	24066378
chr1	24068447
chr1	24068752
chr1	24072801
chr1	24073642
chr1	24074691
chr1	24078490
chr1	24078628
chr1	24079278
chr1	24079909
chr1	24081932
chr1	24081934
chr1	24082240
chr1	24082252
chr1	24082399
chr1	24082688
chr1	24082827
chr1	24082831
chr1	24082914
chr1	24086768
chr1	24086880
chr1	24086973
chr1	24086976
chr1	24087157
chr1	24087160
chr1	24087332
chr1	24087475
chr1	24087511
chr1	24087514
chr1	24087541
chr1	24087547
chr1	24087622
chr1	24087769
chr1	24087853
chr1	24087943
chr1	24088369
chr1	24088494
chr1	24088983
chr1	24088985
chr1	24094252
chr1	24094473
chr1	24094878
chr1	24095236
chr1	24096465
chr1	24097332
chr1	24098023
chr1	24098024
chr1	24099033
chr1	24099051
chr1	24099345
chr1	24099384
chr1	24099608
chr1	24099731
chr1	24099817
chr1	24100351
chr1	24100735
chr1	24100750
chr1	24100857
chr1	24100872
chr1	24100928
chr1	24105862
chr1	24107025
chr1	24107738
chr1	24108886
chr1	24108945
chr1	24109847
chr1	24109866
chr1	24109892
chr1	24109952
chr1	24110018
chr1	24110122
chr1	24110325
chr1	24110829
chr1	24110877
chr1	24110898
chr1	24110976
chr1	24110994
chr1	24111114
chr1	24111141
chr1	24111142
chr1	24114451
chr1	24114707
chr1	24114708
chr1	24114722
chr1	24114844
chr1	24114926
chr1	24122708
chr1	24123818
chr1	24123822
chr1	24123837
chr1	24123985
chr1	24124454
chr1	24124499
chr1	24124605
chr1	24124631
chr1	24124742
chr1	24124808
chr1	24128167
chr1	24128264
chr1	24128679
chr1	24129324
chr1	24129954
chr1	24130098
chr1	24130121
chr1	24130203
chr1	24130874
chr1	24131227
chr1	24131910
chr1	24132440
chr1	24133389
chr1	24133732
chr1	24134144
chr1	24135020
chr1	24135498
chr1	24135654
chr1	24138591
chr1	24140075
chr1	24140851
chr1	24141658
chr1	24145687
chr1	24147101
chr1	24147144
chr1	24147699
chr1	24147955
chr1	24150492
chr1	24152512
chr1	24153784
chr1	24154045
chr1	24157826
chr1	24158020
chr1	24158128
chr1	24158631
chr1	24159775
chr1	24159879
chr1	24161036
chr1	24161949
chr1	24162305
chr1	24162884
chr1	24163027
chr1	24163234
chr1	24163367
chr1	24163566
chr1	24167524
chr1	24167787
chr1	24167822
chr1	24167852
chr1	24168964
chr1	24170619
chr1	24171167
chr1	24171180
chr1	24172923
chr1	24173308
chr1	24173349
chr1	24173537
chr1	24173694
chr1	24173721
chr1	24173730
chr1	24173781
chr1	24173916
chr1	24173967
chr1	24173991
chr1	24174023
chr1	24174074
chr1	24174156
chr1	24174435
chr1	24174453
chr1	24174531
chr1	24174560
chr1	24174567
chr1	24174914
chr1	24175202
chr1	24175319
chr1	24176742
chr1	24176760
chr1	24177345
chr1	24177387
chr1	24177506
chr1	24177740
chr1	24178197
chr1	24178200
chr1	24178673
chr1	24179013
chr1	24179036
chr1	24179279
chr1	24179345
chr1	24179740
chr1	24179800
chr1	24180032
chr1	24180538
chr1	24180578
chr1	24180648
chr1	24180822
chr1	24180850
chr1	24180952
chr1	24181015
chr1	24181695
chr1	24181766
chr1	24181968
chr1	24182001
chr1	24182077
chr1	24182269
chr1	24182275
chr1	24182290
chr1	24182363
chr1	24182376
chr1	24182384
chr1	24182400
chr1	24182684
chr1	24186921
chr1	24187551
chr1	24191393
chr1	24192402
chr1	24192711
chr1	24194809
chr1	24195084
chr1	24195935
chr1	24196503
chr1	24196904
chr1	24197169
chr1	24198742
chr1	24199586
chr1	24199667
chr1	24200651
chr1	24200652
chr1	24202333
chr1	24202459
chr1	24216775
chr1	24218606
chr1	24219533
chr1	24220202
chr1	24220475
chr1	24221151
chr1	24221695
chr1	24221932
chr1	24222343
chr1	24222368
chr1	24222624
chr1	24222811
chr1	24222878
chr1	24223062
chr1	24226447
chr1	24227508
chr1	24227866
chr1	24228108
chr1	24228445
chr1	24228586
chr1	24234868
chr1	24236813
chr1	24236822
chr1	24236825
chr1	24236913
chr1	24237313
chr1	24237316
chr1	24237332
chr1	24237491
chr1	24237682
chr1	24238175
chr1	24238261
chr1	24238384
chr1	24238872
chr1	24238959
chr1	24239088
chr1	24239535
chr1	24239575
chr1	24239665
chr1	24239705
chr1	24240341
chr1	24240377
chr1	24240414
chr1	24240446
chr1	24240451
chr1	24240462
chr1	24240489
chr1	24240634
chr1	24240645
chr1	24241848
chr1	24241990
chr1	24242040
chr1	24242080
chr1	24242383
chr1	24242670
chr1	24242687
chr1	24243287
chr1	24243507
chr1	24243529
chr1	24243925
chr1	24243927
chr1	24244307
chr1	24244310
chr1	24244473
chr1	24244491
chr1	24244503
chr1	24244532
chr1	24244561
chr1	24244814
chr1	24244848
chr1	24244913
chr1	24244915
chr1	24244917
chr1	24244989
chr1	24244991
chr1	24245370
chr1	24245392
chr1	24245423
chr1	24245513
chr1	24245612
chr1	24245770
chr1	24245818
chr1	24246128
chr1	24246196
chr1	24246197
chr1	24246423
chr1	24246447
chr1	24246467
chr1	24246648
chr1	24246802
chr1	24246815
chr1	24246863
chr1	24247056
chr1	24247617
chr1	24247810
chr1	24248188
chr1	24248242
chr1	24248299
chr1	24248378
chr1	24248380
chr1	24248428
chr1	24248531
chr1	24248971
chr1	24249050
chr1	24249115
chr1	24249133
chr1	24249181
chr1	24249208
chr1	24249232
chr1	24250155
chr1	24250208
chr1	24250265
chr1	24250271
chr1	24250276
chr1	24250313
chr1	24250343
chr1	24250348
chr1	24251640
chr1	24251653
chr1	24251659
chr1	24251717
chr1	24251723
chr1	24251736
chr1	24251809
chr1	24251826
chr1	24251846
chr1	24251886
chr1	24251982
chr1	24252168
chr1	24252249
chr1	24252323
chr1	24252438
chr1	24252689
chr1	24260023
chr1	24260045
chr1	24260081
chr1	24260162
chr1	24260318
chr1	24260339
chr1	24260369
chr1	24260383
chr1	24260387
chr1	24260441
chr1	24260471
chr1	24260480
chr1	24260481
chr1	24260534
chr1	24260618
chr1	24260636
chr1	24260714
chr1	24260724
chr1	24260759
chr1	24260783
chr1	24260873
chr1	24260882
chr1	24260912
chr1	24261002
chr1	24261092
chr1	24261561
chr1	24261678
chr1	24261679
chr1	24262116
chr1	24262209
chr1	24262243
chr1	24262486
chr1	24268942
chr1	24269005
chr1	24269079
chr1	24269108
chr1	24269194
chr1	24269199
chr1	24269203
chr1	24269293
chr1	24269296
chr1	24269455
chr1	24269531
chr1	24276559
chr1	24276802
chr1	24276805
chr1	24276982
chr1	24284542
chr1	24284549
chr1	24284912
chr1	24284934
chr1	24285106
chr1	24285650
chr1	24286875
chr1	24286893
chr1	24286978
chr1	24287026
chr1	24287080
chr1	24287138
chr1	24287185
chr1	24287266
chr1	24287290
chr1	24287474
chr1	24288956
chr1	24289696
chr1	24289782
chr1	24290041
chr1	24290188
chr1	24290203
chr1	24290205
chr1	24290355
chr1	24290467
chr1	24290471
chr1	24290521
chr1	24290653
chr1	24290690
chr1	24290695
chr1	24290747
chr1	24290760
chr1	24290785
chr1	24290883
chr1	24292690
chr1	24292727
chr1	24292787
chr1	24292831
chr1	24292832
chr1	24292853
chr1	24292854
chr1	24292887
chr1	24293527
chr1	24293830
chr1	24293849
chr1	24293954
chr1	24293996
chr1	24294106
chr1	24295311
chr1	24295725
chr1	24296727
chr1	24296732
chr1	24296981
chr1	24297183
chr1	24297190
chr1	24297404
chr1	24298113
chr1	24298283
chr1	24298333
chr1	24298343
chr1	24301002
chr1	24301252
chr1	24302184
chr1	24303170
chr1	24303424
chr1	24308031
chr1	24308393
chr1	24310159
chr1	24310301
chr1	24310316
chr1	24311196
chr1	24312471
chr1	24313154
chr1	24319882
chr1	24319901
chr1	24319975
chr1	24319981
chr1	24320259
chr1	24320272
chr1	24320413
chr1	24320414
chr1	24320565
chr1	24320619
chr1	24320646
chr1	24320981
chr1	24320991
chr1	24321859
chr1	24321946
chr1	24322005
chr1	24322131
chr1	24322355
chr1	24322419
chr1	24322512
chr1	24322558
chr1	24322796
chr1	24322977
chr1	24323487
chr1	24323551
chr1	24323595
chr1	24323646
chr1	24323745
chr1	24323815
chr1	24323843
chr1	24341542
chr1	24341704
chr1	24349559
chr1	24349609
chr1	24349897
chr1	24350097
chr1	24353389
chr1	24353589
chr1	24353670
chr1	24353800
chr1	24353963
chr1	24353970
chr1	24353983
chr1	24354024
chr1	24354058
chr1	24354125
chr1	24355136
chr1	24358561
chr1	24359609
chr1	24359665
chr1	24359832
chr1	24359833
chr1	24359946
chr1	24361131
chr1	24361344
chr1	24361600
chr1	24361660
chr1	24361666
chr1	24361690
chr1	24361763
chr1	24361810
chr1	24361817
chr1	24361857
chr1	24361858
chr1	24362277
chr1	24362439
chr1	24362454
chr1	24362562
chr1	24362634
chr1	24362643
chr1	24363321
chr1	24363333
chr1	24363375
chr1	24363420
chr1	24363474
chr1	24363686
chr1	24363704
chr1	24363713
chr1	24363731
chr1	24363969
chr1	24363970
chr1	24364218
chr1	24364520
chr1	24364804
chr1	24365158
chr1	24365170
chr1	24365200
chr1	24365275
chr1	24365338
chr1	24365350
chr1	24365508
chr1	24365564
chr1	24365568
chr1	24365608
chr1	24365643
chr1	24365679
chr1	24365727
chr1	24365752
chr1	24365791
chr1	24365866
chr1	24365871
chr1	24365887
chr1	24366047
chr1	24371712
chr1	24371785
chr1	24371805
chr1	24371872
chr1	24371908
chr1	24371971
chr1	24373195
chr1	24379807
chr1	24380781
chr1	24381238
chr1	24381361
chr1	24381366
chr1	24383236
chr1	24418476
chr1	24435006
chr1	24440717
chr1	24440746
chr1	24441048
chr1	24442597
chr1	24442936
chr1	24445016
chr1	24446029
chr1	24489914
chr1	24491633
chr1	24491863
chr1	24492732
chr1	24493360
chr1	24493776
chr1	24499134
chr1	24525304
chr1	24541746
chr1	24541819
chr1	24542042
chr1	24542110
chr1	24547927
chr1	24548269
chr1	24548329
chr1	24549073
chr1	24549240
chr1	24550078
chr1	24551014
chr1	24557448
chr1	24557512
chr1	24557842
chr1	24557977
chr1	24558312
chr1	24559321
chr1	24559327
chr1	24559373
chr1	24559416
chr1	24559445
chr1	24559599
chr1	24559656
chr1	24559833
chr1	24560022
chr1	24560065
chr1	24560074
chr1	24560119
chr1	24560327
chr1	24560407
chr1	24560460
chr1	24560512
chr1	24560518
chr1	24560535
chr1	24560596
chr1	24560761
chr1	24560809
chr1	24560818
chr1	24560837
chr1	24560847
chr1	24593980
chr1	24594058
chr1	24594305
chr1	24594803
chr1	24596059
chr1	24596192
chr1	24596692
chr1	24596722
chr1	24596728
chr1	24596731
chr1	24596849
chr1	24600674
chr1	24600845
chr1	24600922
chr1	24601034
chr1	24615387
chr1	24616052
chr1	24637394
chr1	24637769
chr1	24647271
chr1	24647289
chr1	24647445
chr1	24647448
chr1	24647451
chr1	24647721
chr1	24647769
chr1	24647772
chr1	24647778
chr1	24647784
chr1	24657098
chr1	24686466
chr1	24686471
chr1	24686520
chr1	24686713
chr1	24687117
chr1	24693022
chr1	24693112
chr1	24693143
chr1	24693769
chr1	24693852
chr1	24693855
chr1	24693900
chr1	24693954
chr1	24693960
chr1	24693978
chr1	24694071
chr1	24694129
chr1	24694140
chr1	24694164
chr1	24694197
chr1	24694266
chr1	24694269
chr1	24694287
chr1	24694413
chr1	24694485
chr1	24694494
chr1	24694533
chr1	24694644
chr1	24694653
chr1	24694665
chr1	24694809
chr1	24694812
chr1	24695305
chr1	24695386
chr1	24695772
chr1	24695773
chr1	24695823
chr1	24695967
chr1	24695985
chr1	24695991
chr1	24696179
chr1	24696408
chr1	24696458
chr1	24696662
chr1	24696689
chr1	24696839
chr1	24697181
chr1	24697426
chr1	24697427
chr1	24697437
chr1	24697449
chr1	24697450
chr1	24697545
chr1	24697575
chr1	24697588
chr1	24697589
chr1	24697741
chr1	24697896
chr1	24698161
chr1	24698166
chr1	24698171
chr1	24713168
chr1	24714581
chr1	24730146
chr1	24730188
chr1	24735036
chr1	24735078
chr1	24737234
chr1	24737312
chr1	24737916
chr1	24738828
chr1	24739000
chr1	24748668
chr1	24770658
chr1	24770756
chr1	24770802
chr1	24770831
chr1	24770871
chr1	24770935
chr1	24771018
chr1	24771021
chr1	24771045
chr1	24771324
chr1	24774193
chr1	24774284
chr1	24774366
chr1	24774867
chr1	24774899
chr1	24775208
chr1	24775289
chr1	24775396
chr1	24778451
chr1	24778852
chr1	24779291
chr1	24779694
chr1	24779724
chr1	24779727
chr1	24779986
chr1	24780267
chr1	24780535
chr1	24795991
chr1	24806117
chr1	24806151
chr1	24806322
chr1	24806406
chr1	24806829
chr1	24806843
chr1	24806884
chr1	24806950
chr1	24807304
chr1	24811316
chr1	24811422
chr1	24811500
chr1	24811524
chr1	24811568
chr1	24811583
chr1	24811938
chr1	24811939
chr1	24811943
chr1	24812009
chr1	24812040
chr1	24812101
chr1	24812105
chr1	24812126
chr1	24812135
chr1	24812150
chr1	24812188
chr1	24812256
chr1	24813288
chr1	24813301
chr1	24814035
chr1	24814039
chr1	24814079
chr1	24814329
chr1	24814581
chr1	24814600
chr1	24814602
chr1	24814654
chr1	24814780
chr1	24815044
chr1	24815065
chr1	24815131
chr1	24815138
chr1	24815142
chr1	24815206
chr1	24815317
chr1	24815409
chr1	24815414
chr1	24815806
chr1	24815810
chr1	24815865
chr1	24815880
chr1	24815881
chr1	24815968
chr1	24816018
chr1	24816031
chr1	24816037
chr1	24816088
chr1	24816199
chr1	24816405
chr1	24816541
chr1	24816542
chr1	24816643
chr1	24816683
chr1	24816752
chr1	24816900
chr1	24817629
chr1	24817632
chr1	24818631
chr1	24819311
chr1	24819317
chr1	24819454
chr1	24819463
chr1	24820644
chr1	24820645
chr1	24820843
chr1	24820906
chr1	24820908
chr1	24821466
chr1	24821757
chr1	24821764
chr1	24822115
chr1	24839297
chr1	24839562
chr1	24840134
chr1	24840542
chr1	24841645
chr1	24852738
chr1	24852919
chr1	24853162
chr1	24853190
chr1	24853214
chr1	24853244
chr1	24853250
chr1	24853289
chr1	24853299
chr1	24853324
chr1	24853331
chr1	24853877
chr1	24853900
chr1	24853940
chr1	24853943
chr1	24853964
chr1	24854015
chr1	24854050
chr1	24854051
chr1	24860332
chr1	24860469
chr1	24861839
chr1	24862362
chr1	24862726
chr1	24862781
chr1	24863030
chr1	24863050
chr1	24863289
chr1	24863796
chr1	24863968
chr1	24864387
chr1	24864701
chr1	24864904
chr1	24865490
chr1	24866402
chr1	24866635
chr1	24868353
chr1	24868679
chr1	24868802
chr1	24868805
chr1	24868820
chr1	24877851
chr1	24885539
chr1	24886362
chr1	24887138
chr1	24887372
chr1	24889417
chr1	24890531
chr1	24891240
chr1	24891766
chr1	24892953
chr1	24893212
chr1	24893278
chr1	24893441
chr1	24895275
chr1	24895798
chr1	24896397
chr1	24897142
chr1	24902746
chr1	24902925
chr1	24902940
chr1	24902993
chr1	24902995
chr1	24902996
chr1	24903202
chr1	24903217
chr1	24904204
chr1	24904227
chr1	24904407
chr1	24906477
chr1	24906904
chr1	24907036
chr1	24907108
chr1	24907156
chr1	24907195
chr1	24907198
chr1	24911036
chr1	24911484
chr1	24930263
chr1	24930423
chr1	24934859
chr1	24935060
chr1	24935272
chr1	24935345
chr1	24935476
chr1	24954059
chr1	24954081
chr1	24954095
chr1	24954821
chr1	24954892
chr1	24957760
chr1	24957818
chr1	24959674
chr1	24960272
chr1	24960524
chr1	24960530
chr1	24960660
chr1	24960714
chr1	24960780
chr1	24960783
chr1	24960786
chr1	24961096
chr1	24961099
chr1	24961240
chr1	24963719
chr1	24965639
chr1	25036940
chr1	25037437
chr1	25038645
chr1	25045280
chr1	25046147
chr1	25046362
chr1	25046789
chr1	25054674
chr1	25057553
chr1	25057555
chr1	25057628
chr1	25057694
chr1	25057709
chr1	25057710
chr1	25057751
chr1	25057761
chr1	25057902
chr1	25057961
chr1	25057982
chr1	25058032
chr1	25058050
chr1	25058071
chr1	25058130
chr1	25058150
chr1	25058162
chr1	25058172
chr1	25071539
chr1	25072337
chr1	25073735
chr1	25076931
chr1	25077773
chr1	25077961
chr1	25079565
chr1	25080428
chr1	25081972
chr1	25082191
chr1	25082542
chr1	25083087
chr1	25083532
chr1	25083635
chr1	25085930
chr1	25088457
chr1	25088746
chr1	25090473
chr1	25093676
chr1	25094612
chr1	25094788
chr1	25095246
chr1	25096004
chr1	25096142
chr1	25096386
chr1	25096774
chr1	25101112
chr1	25101337
chr1	25102099
chr1	25102119
chr1	25104656
chr1	25104907
chr1	25105171
chr1	25105323
chr1	25106690
chr1	25109440
chr1	25110544
chr1	25111657
chr1	25112197
chr1	25114770
chr1	25117138
chr1	25127312
chr1	25132629
chr1	25132805
chr1	25137330
chr1	25137451
chr1	25143543
chr1	25143746
chr1	25151658
chr1	25152538
chr1	25153266
chr1	25153537
chr1	25153570
chr1	25153643
chr1	25153765
chr1	25154645
chr1	25155285
chr1	25156048
chr1	25164222
chr1	25164580
chr1	25164751
chr1	25188374
chr1	25188381
chr1	25188451
chr1	25188498
chr1	25188506
chr1	25188552
chr1	25188758
chr1	25188773
chr1	25189172
chr1	25189396
chr1	25189507
chr1	25189907
chr1	25189931
chr1	25190104
chr1	25190150
chr1	25190177
chr1	25190388
chr1	25190557
chr1	25194858
chr1	25194862
chr1	25195442
chr1	25195682
chr1	25196859
chr1	25199582
chr1	25206629
chr1	25207570
chr1	25209667
chr1	25210225
chr1	25210320
chr1	25210823
chr1	25212109
chr1	25230479
chr1	25230557
chr1	25230711
chr1	25230911
chr1	25230920
chr1	25230935
chr1	25230959
chr1	25230960
chr1	25231659
chr1	25235868
chr1	25235918
chr1	25235984
chr1	25236074
chr1	25236983
chr1	25237108
chr1	25237116
chr1	25237144
chr1	25237160
chr1	25237380
chr1	25237465
chr1	25237490
chr1	25237677
chr1	25237692
chr1	25239343
chr1	25239398
chr1	25240513
chr1	25244526
chr1	25248662
chr1	25249004
chr1	25249022
chr1	25249209
chr1	25250563
chr1	25252034
chr1	25253220
chr1	25253383
chr1	25253547
chr1	25255275
chr1	25255406
chr1	25255496
chr1	25255786
chr1	25256709
chr1	25257486
chr1	25257658
chr1	25258441
chr1	25258718
chr1	25260157
chr1	25262642
chr1	25262917
chr1	25262938
chr1	25263161
chr1	25263374
chr1	25263390
chr1	25263486
chr1	25263763
chr1	25264219
chr1	25264342
chr1	25265093
chr1	25265135
chr1	25265294
chr1	25265453
chr1	25265474
chr1	25265483
chr1	25265486
chr1	25265625
chr1	25265629
chr1	25269736
chr1	25270377
chr1	25270434
chr1	25270511
chr1	25270535
chr1	25270562
chr1	25271030
chr1	25271246
chr1	25271358
chr1	25271417
chr1	25271419
chr1	25272297
chr1	25272303
chr1	25272361
chr1	25272370
chr1	25272536
chr1	25272599
chr1	25272778
chr1	25272786
chr1	25272829
chr1	25272830
chr1	25273221
chr1	25273241
chr1	25273253
chr1	25273263
chr1	25273280
chr1	25273328
chr1	25273341
chr1	25273421
chr1	25273428
chr1	25273436
chr1	25273445
chr1	25273461
chr1	25276330
chr1	25276982
chr1	25277251
chr1	25278001
chr1	25278150
chr1	25281872
chr1	25282252
chr1	25284361
chr1	25284885
chr1	25287535
chr1	25287701
chr1	25290560
chr1	25291516
chr1	25291711
chr1	25291875
chr1	25293176
chr1	25294026
chr1	25294341
chr1	25294384
chr1	25294663
chr1	25295736
chr1	25296405
chr1	25296440
chr1	25296705
chr1	25308659
chr1	25309394
chr1	25310078
chr1	25310237
chr1	25310238
chr1	25312955
chr1	25313086
chr1	25314106
chr1	25314124
chr1	25314600
chr1	25314798
chr1	25315409
chr1	25320168
chr1	25320186
chr1	25320192
chr1	25320349
chr1	25321170
chr1	25321328
chr1	25321592
chr1	25321682
chr1	25321849
chr1	25321939
chr1	25321960
chr1	25322050
chr1	25322104
chr1	25322118
chr1	25322131
chr1	25322167
chr1	25322460
chr1	25322464
chr1	25322523
chr1	25322532
chr1	25322622
chr1	25322707
chr1	25323124
chr1	25323140
chr1	25323481
chr1	25323514
chr1	25323529
chr1	25323619
chr1	25323628
chr1	25323694
chr1	25323754
chr1	25323796
chr1	25323811
chr1	25324060
chr1	25324160
chr1	25324189
chr1	25324192
chr1	25325389
chr1	25325420
chr1	25330695
chr1	25330936
chr1	25340627
chr1	25340652
chr1	25340687
chr1	25340692
chr1	25341410
chr1	25341441
chr1	25341951
chr1	25343049
chr1	25343134
chr1	25343193
chr1	25344699
chr1	25346331
chr1	25346392
chr1	25346529
chr1	25359668
chr1	25359855
chr1	25360073
chr1	25361073
chr1	25365250
chr1	25365768
chr1	25365868
chr1	25366029
chr1	25367879
chr1	25368208
chr1	25369042
chr1	25369268
chr1	25369269
chr1	25369685
chr1	25369887
chr1	25370427
chr1	25370497
chr1	25371100
chr1	25371227
chr1	25371708
chr1	25372288
chr1	25372326
chr1	25372350
chr1	25372935
chr1	25372941
chr1	25373734
chr1	25374453
chr1	25374480
chr1	25375036
chr1	25375042
chr1	25375438
chr1	25375450
chr1	25375620
chr1	25375657
chr1	25375673
chr1	25375766
chr1	25375776
chr1	25386303
chr1	25386895
chr1	25387925
chr1	25390134
chr1	25390935
chr1	25392884
chr1	25392910
chr1	25393040
chr1	25393221
chr1	25416608
chr1	25416667
chr1	25416814
chr1	25416821
chr1	25416997
chr1	25417004
chr1	25418229
chr1	25418412
chr1	25418480
chr1	25418481
chr1	25418741
chr1	25418749
chr1	25418784
chr1	25418953
chr1	25419326
chr1	25419394
chr1	25419435
chr1	25419448
chr1	25419784
chr1	25419834
chr1	25419839
chr1	25419853
chr1	25420057
chr1	25420087
chr1	25420797
chr1	25420867
chr1	25420877
chr1	25420891
chr1	25420969
chr1	25421346
chr1	25423308
chr1	25423450
chr1	25426555
chr1	25430589
chr1	25430619
chr1	25430942
chr1	25430944
chr1	25430977
chr1	25431007
chr1	25431137
chr1	25431282
chr1	25431516
chr1	25431574
chr1	25431932
chr1	25432173
chr1	25434347
chr1	25434449
chr1	25435029
chr1	25435137
chr1	25436005
chr1	25436274
chr1	25436477
chr1	25436489
chr1	25436931
chr1	25437522
chr1	25438208
chr1	25438239
chr1	25438259
chr1	25438758
chr1	25439487
chr1	25439496
chr1	25439898
chr1	25440747
chr1	25442758
chr1	25442922
chr1	25443364
chr1	25454050
chr1	25454189
chr1	25454201
chr1	25454251
chr1	25454372
chr1	25454416
chr1	25454441
chr1	25454450
chr1	25454456
chr1	25454636
chr1	25454645
chr1	25454666
chr1	25454699
chr1	25454912
chr1	25454969
chr1	25455104
chr1	25455403
chr1	25458484
chr1	25458609
chr1	25458736
chr1	25458741
chr1	25459323
chr1	25459617
chr1	25460975
chr1	25461631
chr1	25461816
chr1	25462140
chr1	25462225
chr1	25465001
chr1	25475179
chr1	25476046
chr1	25478181
chr1	25480648
chr1	25480904
chr1	25480937
chr1	25481142
chr1	25481407
chr1	25481517
chr1	25481895
chr1	25481907
chr1	25481930
chr1	25481976
chr1	25482039
chr1	25482041
chr1	25482105
chr1	25482726
chr1	25483325
chr1	25483388
chr1	25483397
chr1	25483586
chr1	25483623
chr1	25483659
chr1	25483683
chr1	25484058
chr1	25484069
chr1	25484197
chr1	25484791
chr1	25485366
chr1	25485485
chr1	25485537
chr1	25486164
chr1	25486179
chr1	25486212
chr1	25486220
chr1	25486236
chr1	25486260
chr1	25486294
chr1	25491155
chr1	25491327
chr1	25491499
chr1	25492857
chr1	25492943
chr1	25492974
chr1	25493037
chr1	25493415
chr1	25494285
chr1	25494350
chr1	25494657
chr1	25494660
chr1	25494959
chr1	25494965
chr1	25495144
chr1	25495527
chr1	25495836
chr1	25495849
chr1	25497228
chr1	25497230
chr1	25497690
chr1	25497702
chr1	25498086
chr1	25498095
chr1	25498179
chr1	25498314
chr1	25498347
chr1	25498419
chr1	25498459
chr1	25498494
chr1	25498527
chr1	25498899
chr1	25499127
chr1	25499340
chr1	25499367
chr1	25499927
chr1	25499947
chr1	25500076
chr1	25500100
chr1	25500106
chr1	25500148
chr1	25500242
chr1	25500243
chr1	25500247
chr1	25500363
chr1	25500376
chr1	25500494
chr1	25500584
chr1	25500630
chr1	25500681
chr1	25500786
chr1	25500847
chr1	25500863
chr1	25501043
chr1	25501338
chr1	25501485
chr1	25501493
chr1	25501518
chr1	25501536
chr1	25510892
chr1	25516286
chr1	25516493
chr1	25516719
chr1	25517529
chr1	25517669
chr1	25518719
chr1	25520352
chr1	25521489
chr1	25521626
chr1	25526640
chr1	25526656
chr1	25526890
chr1	25527951
chr1	25527953
chr1	25533963
chr1	25533984
chr1	25539245
chr1	25539437
chr1	25540659
chr1	25540947
chr1	25546098
chr1	25546289
chr1	25547248
chr1	25548590
chr1	25548596
chr1	25548630
chr1	25559671
chr1	25559944
chr1	25560169
chr1	25560323
chr1	25560806
chr1	25560834
chr1	25562270
chr1	25570320
chr1	25570723
chr1	25570988
chr1	25571041
chr1	25571138
chr1	25571581
chr1	25574504
chr1	25574505
chr1	25574530
chr1	25575667
chr1	25575676
chr1	25578081
chr1	25578151
chr1	25578307
chr1	25578314
chr1	25578711
chr1	25579446
chr1	25579647
chr1	25579836
chr1	25579846
chr1	25579852
chr1	25580013
chr1	25580029
chr1	25580154
chr1	25580162
chr1	25580218
chr1	25580222
chr1	25580244
chr1	25580260
chr1	25580816
chr1	25585905
chr1	25585941
chr1	25586060
chr1	25586265
chr1	25586461
chr1	25586823
chr1	25586828
chr1	25587569
chr1	25597077
chr1	25598300
chr1	25598459
chr1	25599172
chr1	25599538
chr1	25600279
chr1	25600580
chr1	25600801
chr1	25600802
chr1	25614370
chr1	25614443
chr1	25614675
chr1	25614862
chr1	25614976
chr1	25615018
chr1	25615183
chr1	25621597
chr1	25621608
chr1	25621614
chr1	25621674
chr1	25621675
chr1	25621801
chr1	25621872
chr1	25622303
chr1	25632574
chr1	25633097
chr1	25634702
chr1	25642429
chr1	25644983
chr1	25644986
chr1	25645118
chr1	25645142
chr1	25645148
chr1	25646191
chr1	25647280
chr1	25647431
chr1	25648011
chr1	25650497
chr1	25652538
chr1	25652539
chr1	25652745
chr1	25658587
chr1	25659038
chr1	25669040
chr1	25669153
chr1	25669887
chr1	25676626
chr1	25677863
chr1	25678014
chr1	25695221
chr1	25695371
chr1	25695458
chr1	25695479
chr1	25712974
chr1	25726065
chr1	25726158
chr1	25726281
chr1	25726470
chr1	25726557
chr1	25726803
chr1	25726980
chr1	25727027
chr1	25734384
chr1	25734385
chr1	25734468
chr1	25734913
chr1	25735095
chr1	25735917
chr1	25737089
chr1	25737098
chr1	25737766
chr1	25748087
chr1	25748120
chr1	25748162
chr1	25748270
chr1	25748276
chr1	25748330
chr1	25748436
chr1	25748588
chr1	25748637
chr1	25749101
chr1	25749112
chr1	25749157
chr1	25749169
chr1	25749205
chr1	25749208
chr1	25752946
chr1	25753174
chr1	25753797
chr1	25754182
chr1	25754787
chr1	25754805
chr1	25755181
chr1	25755738
chr1	25757493
chr1	25757534
chr1	25757587
chr1	25757656
chr1	25757692
chr1	25757881
chr1	25757949
chr1	25777932
chr1	25778032
chr1	25778569
chr1	25778597
chr1	25778748
chr1	25778809
chr1	25778891
chr1	25779085
chr1	25779148
chr1	25783090
chr1	25783110
chr1	25783179
chr1	25783185
chr1	25783188
chr1	25783305
chr1	25783307
chr1	25783476
chr1	25783715
chr1	25783863
chr1	25783873
chr1	25783881
chr1	25785958
chr1	25785973
chr1	25786268
chr1	25786351
chr1	25786418
chr1	25786419
chr1	25786469
chr1	25788984
chr1	25791385
chr1	25791666
chr1	25791695
chr1	25791953
chr1	25797992
chr1	25804799
chr1	25805624
chr1	25806129
chr1	25808241
chr1	25808249
chr1	25808883
chr1	25809303
chr1	25809916
chr1	25810644
chr1	25829462
chr1	25829648
chr1	25834888
chr1	25839159
chr1	25839203
chr1	25867141
chr1	25867813
chr1	25868216
chr1	25873563
chr1	25873700
chr1	25880975
chr1	25881162
chr1	25881522
chr1	25888171
chr1	25889912
chr1	25890855
chr1	25891652
chr1	25897093
chr1	25899155
chr1	25900487
chr1	25903014
chr1	25905239
chr1	25905659
chr1	25908273
chr1	25908290
chr1	25908300
chr1	25908329
chr1	25908356
chr1	25908477
chr1	25908601
chr1	25909069
chr1	25909075
chr1	25909174
chr1	25909204
chr1	25909307
chr1	25909336
chr1	25910373
chr1	25910690
chr1	25915169
chr1	25915577
chr1	25915633
chr1	25915651
chr1	25915655
chr1	25915857
chr1	25916091
chr1	25916132
chr1	25916359
chr1	25916397
chr1	25916584
chr1	25916721
chr1	25916837
chr1	25918483
chr1	25920778
chr1	25921145
chr1	25922850
chr1	25923551
chr1	25925065
chr1	25925105
chr1	25925475
chr1	25925829
chr1	25927121
chr1	25927129
chr1	25927239
chr1	25927306
chr1	25933187
chr1	25933254
chr1	25933257
chr1	25933269
chr1	25933289
chr1	25933469
chr1	25933473
chr1	25933509
chr1	25933523
chr1	25933556
chr1	25933565
chr1	25933650
chr1	25933852
chr1	25933863
chr1	25933868
chr1	25933943
chr1	25934003
chr1	25934094
chr1	25934126
chr1	25934280
chr1	25934328
chr1	25934334
chr1	25934502
chr1	25934576
chr1	25934603
chr1	25934610
chr1	25934645
chr1	25934692
chr1	25934738
chr1	25935009
chr1	25935074
chr1	25935121
chr1	25935339
chr1	25935340
chr1	25935421
chr1	25935458
chr1	25935474
chr1	25935514
chr1	25935621
chr1	25935625
chr1	25935777
chr1	25935935
chr1	25936114
chr1	25936117
chr1	25936258
chr1	25936402
chr1	25936686
chr1	25936859
chr1	25936928
chr1	25937320
chr1	25937350
chr1	25938682
chr1	25938700
chr1	25939361
chr1	25939506
chr1	25939741
chr1	25940038
chr1	25940171
chr1	25940525
chr1	25940676
chr1	25940867
chr1	25942749
chr1	25942937
chr1	25943021
chr1	25943255
chr1	25943258
chr1	25943624
chr1	25943975
chr1	25944107
chr1	25944303
chr1	25944466
chr1	25945176
chr1	25946396
chr1	25946399
chr1	25946407
chr1	25946906
chr1	25958673
chr1	25968290
chr1	25968797
chr1	25996618
chr1	26006045
chr1	26006671
chr1	26006690
chr1	26006840
chr1	26016477
chr1	26016534
chr1	26016563
chr1	26016784
chr1	26016825
chr1	26016869
chr1	26016893
chr1	26016953
chr1	26017025
chr1	26017029
chr1	26017034
chr1	26017058
chr1	26017169
chr1	26017175
chr1	26017217
chr1	26017525
chr1	26017567
chr1	26017640
chr1	26017655
chr1	26017702
chr1	26017733
chr1	26018111
chr1	26018114
chr1	26018520
chr1	26018661
chr1	26018723
chr1	26018741
chr1	26018803
chr1	26019009
chr1	26019209
chr1	26019820
chr1	26019928
chr1	26020130
chr1	26020142
chr1	26020244
chr1	26020274
chr1	26020276
chr1	26020331
chr1	26020412
chr1	26021051
chr1	26021195
chr1	26021298
chr1	26021419
chr1	26021420
chr1	26021615
chr1	26021702
chr1	26021770
chr1	26021820
chr1	26021892
chr1	26022226
chr1	26022413
chr1	26022666
chr1	26022707
chr1	26022968
chr1	26023007
chr1	26023036
chr1	26023307
chr1	26023341
chr1	26023447
chr1	26023456
chr1	26023460
chr1	26023782
chr1	26024011
chr1	26024055
chr1	26024084
chr1	26024946
chr1	26025439
chr1	26025564
chr1	26025586
chr1	26025745
chr1	26025781
chr1	26025808
chr1	26026184
chr1	26026938
chr1	26034260
chr1	26034810
chr1	26035028
chr1	26037054
chr1	26037656
chr1	26038727
chr1	26038756
chr1	26039142
chr1	26039466
chr1	26039553
chr1	26039637
chr1	26039709
chr1	26039724
chr1	26039727
chr1	26039904
chr1	26039924
chr1	26040213
chr1	26040251
chr1	26040716
chr1	26041528
chr1	26041549
chr1	26041570
chr1	26041905
chr1	26042209
chr1	26042510
chr1	26042589
chr1	26046065
chr1	26046189
chr1	26046202
chr1	26046387
chr1	26047089
chr1	26047142
chr1	26047369
chr1	26047779
chr1	26047953
chr1	26048181
chr1	26048183
chr1	26048230
chr1	26048239
chr1	26048269
chr1	26048279
chr1	26048317
chr1	26048378
chr1	26048526
chr1	26048689
chr1	26048797
chr1	26048799
chr1	26049132
chr1	26049329
chr1	26050201
chr1	26050204
chr1	26050207
chr1	26050233
chr1	26050241
chr1	26050343
chr1	26050354
chr1	26050409
chr1	26050430
chr1	26050455
chr1	26050482
chr1	26050536
chr1	26050594
chr1	26050603
chr1	26050690
chr1	26050699
chr1	26050805
chr1	26050846
chr1	26050878
chr1	26050907
chr1	26050932
chr1	26050968
chr1	26050970
chr1	26051074
chr1	26051322
chr1	26051339
chr1	26051468
chr1	26051477
chr1	26051698
chr1	26051847
chr1	26051865
chr1	26051870
chr1	26051889
chr1	26054861
chr1	26055875
chr1	26056225
chr1	26056312
chr1	26056313
chr1	26056382
chr1	26056748
chr1	26057393
chr1	26065028
chr1	26065076
chr1	26072735
chr1	26073141
chr1	26073326
chr1	26073335
chr1	26074362
chr1	26075536
chr1	26080206
chr1	26080438
chr1	26081613
chr1	26084744
chr1	26084785
chr1	26085131
chr1	26085291
chr1	26085625
chr1	26087555
chr1	26087835
chr1	26089785
chr1	26089819
chr1	26089930
chr1	26089954
chr1	26090416
chr1	26090542
chr1	26093495
chr1	26093584
chr1	26093641
chr1	26093716
chr1	26094510
chr1	26094654
chr1	26095154
chr1	26095214
chr1	26095576
chr1	26096147
chr1	26096752
chr1	26096780
chr1	26096901
chr1	26096906
chr1	26098117
chr1	26098120
chr1	26098258
chr1	26098393
chr1	26098600
chr1	26098609
chr1	26098618
chr1	26098981
chr1	26099068
chr1	26099078
chr1	26099122
chr1	26099134
chr1	26102543
chr1	26102687
chr1	26104250
chr1	26104662
chr1	26107008
chr1	26107088
chr1	26107112
chr1	26107117
chr1	26107151
chr1	26107162
chr1	26107409
chr1	26107457
chr1	26107580
chr1	26107790
chr1	26107874
chr1	26107901
chr1	26108159
chr1	26108168
chr1	26108276
chr1	26108533
chr1	26108593
chr1	26108623
chr1	26108862
chr1	26109731
chr1	26109941
chr1	26109955
chr1	26109956
chr1	26109992
chr1	26112111
chr1	26112471
chr1	26113008
chr1	26118532
chr1	26118578
chr1	26126445
chr1	26126453
chr1	26126828
chr1	26126912
chr1	26127013
chr1	26127304
chr1	26127618
chr1	26127625
chr1	26127671
chr1	26127738
chr1	26127882
chr1	26127915
chr1	26128969
chr1	26129288
chr1	26129477
chr1	26129534
chr1	26129539
chr1	26131657
chr1	26131693
chr1	26131694
chr1	26132313
chr1	26132476
chr1	26132869
chr1	26142092
chr1	26142135
chr1	26142341
chr1	26142407
chr1	26142958
chr1	26143033
chr1	26143168
chr1	26145152
chr1	26145490
chr1	26145518
chr1	26153783
chr1	26176169
chr1	26177175
chr1	26183274
chr1	26183278
chr1	26183333
chr1	26183384
chr1	26187987
chr1	26189885
chr1	26190159
chr1	26190255
chr1	26190345
chr1	26190368
chr1	26190644
chr1	26190947
chr1	26191003
chr1	26191304
chr1	26191631
chr1	26191805
chr1	26191856
chr1	26192218
chr1	26192249
chr1	26192427
chr1	26192529
chr1	26192611
chr1	26192651
chr1	26193834
chr1	26202337
chr1	26202600
chr1	26203102
chr1	26206718
chr1	26206723
chr1	26237106
chr1	26248445
chr1	26248474
chr1	26248625
chr1	26251773
chr1	26252179
chr1	26275534
chr1	26278072
chr1	26288517
chr1	26288529
chr1	26289503
chr1	26289507
chr1	26290236
chr1	26290523
chr1	26292834
chr1	26292915
chr1	26293690
chr1	26293847
chr1	26293998
chr1	26294127
chr1	26294139
chr1	26294226
chr1	26294229
chr1	26294231
chr1	26294256
chr1	26294857
chr1	26294980
chr1	26294989
chr1	26295022
chr1	26297512
chr1	26297587
chr1	26316303
chr1	26316342
chr1	26316351
chr1	26316481
chr1	26316596
chr1	26316654
chr1	26316696
chr1	26316732
chr1	26316947
chr1	26317000
chr1	26317129
chr1	26317400
chr1	26317431
chr1	26318167
chr1	26318376
chr1	26318509
chr1	26318929
chr1	26318998
chr1	26319091
chr1	26319169
chr1	26319228
chr1	26319231
chr1	26319248
chr1	26319258
chr1	26319332
chr1	26319506
chr1	26319803
chr1	26320079
chr1	26320092
chr1	26320197
chr1	26320205
chr1	26323465
chr1	26323471
chr1	26323489
chr1	26323511
chr1	26323606
chr1	26323609
chr1	26323671
chr1	26323690
chr1	26323838
chr1	26323839
chr1	26323885
chr1	26323929
chr1	26323935
chr1	26324078
chr1	26324192
chr1	26324258
chr1	26324456
chr1	26324459
chr1	26326664
chr1	26326787
chr1	26327763
chr1	26327766
chr1	26330099
chr1	26330567
chr1	26330576
chr1	26330591
chr1	26330600
chr1	26330666
chr1	26330693
chr1	26330714
chr1	26330720
chr1	26330791
chr1	26330792
chr1	26330993
chr1	26331035
chr1	26331056
chr1	26331068
chr1	26331158
chr1	26331254
chr1	26331305
chr1	26331314
chr1	26331329
chr1	26331435
chr1	26331884
chr1	26331922
chr1	26332092
chr1	26338159
chr1	26341853
chr1	26341994
chr1	26342660
chr1	26346910
chr1	26347144
chr1	26347618
chr1	26348574
chr1	26348617
chr1	26349496
chr1	26349989
chr1	26350079
chr1	26350473
chr1	26356235
chr1	26356581
chr1	26356616
chr1	26356850
chr1	26356905
chr1	26357145
chr1	26363391
chr1	26363393
chr1	26363515
chr1	26363570
chr1	26363605
chr1	26363607
chr1	26363611
chr1	26363707
chr1	26363764
chr1	26363832
chr1	26363866
chr1	26363869
chr1	26363890
chr1	26363959
chr1	26364205
chr1	26364396
chr1	26364433
chr1	26364751
chr1	26383775
chr1	26388796
chr1	26388831
chr1	26389270
chr1	26389294
chr1	26389419
chr1	26389433
chr1	26389489
chr1	26389493
chr1	26389550
chr1	26389575
chr1	26389748
chr1	26389754
chr1	26389775
chr1	26389850
chr1	26389985
chr1	26390046
chr1	26390541
chr1	26390748
chr1	26391334
chr1	26391531
chr1	26391684
chr1	26391714
chr1	26391903
chr1	26393047
chr1	26393489
chr1	26402138
chr1	26412587
chr1	26412596
chr1	26412826
chr1	26412832
chr1	26412872
chr1	26412886
chr1	26413028
chr1	26413030
chr1	26413084
chr1	26413093
chr1	26413111
chr1	26413129
chr1	26413183
chr1	26413906
chr1	26413960
chr1	26414286
chr1	26414969
chr1	26417238
chr1	26420428
chr1	26421580
chr1	26422336
chr1	26427026
chr1	26428866
chr1	26429888
chr1	26429889
chr1	26431547
chr1	26432048
chr1	26433298
chr1	26434062
chr1	26434292
chr1	26437292
chr1	26446236
chr1	26451223
chr1	26455330
chr1	26471266
chr1	26471326
chr1	26472685
chr1	26477897
chr1	26478170
chr1	26478284
chr1	26478296
chr1	26478362
chr1	26478450
chr1	26478521
chr1	26478560
chr1	26478695
chr1	26478698
chr1	26478710
chr1	26478770
chr1	26478772
chr1	26478776
chr1	26478809
chr1	26478833
chr1	26478851
chr1	26478969
chr1	26479001
chr1	26479024
chr1	26479186
chr1	26479291
chr1	26479339
chr1	26479345
chr1	26479348
chr1	26479404
chr1	26479406
chr1	26479507
chr1	26479522
chr1	26479713
chr1	26480316
chr1	26480325
chr1	26485808
chr1	26488706
chr1	26489488
chr1	26496493
chr1	26497060
chr1	26498471
chr1	26507255
chr1	26509698
chr1	26534082
chr1	26535133
chr1	26537638
chr1	26539633
chr1	26539966
chr1	26539975
chr1	26539992
chr1	26540002
chr1	26540023
chr1	26540224
chr1	26540349
chr1	26540361
chr1	26547876
chr1	26561934
chr1	26562340
chr1	26563273
chr1	26576697
chr1	26583690
chr1	26584209
chr1	26584249
chr1	26584459
chr1	26584650
chr1	26586874
chr1	26587209
chr1	26588474
chr1	26588934
chr1	26589026
chr1	26597771
chr1	26599665
chr1	26599723
chr1	26599874
chr1	26608233
chr1	26610948
chr1	26614120
chr1	26615388
chr1	26616828
chr1	26618383
chr1	26618530
chr1	26620064
chr1	26621351
chr1	26621549
chr1	26624500
chr1	26626660
chr1	26627555
chr1	26627835
chr1	26628431
chr1	26630636
chr1	26630693
chr1	26630796
chr1	26632124
chr1	26632264
chr1	26632568
chr1	26633398
chr1	26634131
chr1	26637466
chr1	26637486
chr1	26637505
chr1	26637744
chr1	26637770
chr1	26637882
chr1	26638249
chr1	26638328
chr1	26638860
chr1	26638956
chr1	26638983
chr1	26640189
chr1	26640884
chr1	26642050
chr1	26648020
chr1	26648471
chr1	26650878
chr1	26666512
chr1	26666916
chr1	26666959
chr1	26668895
chr1	26669744
chr1	26670644
chr1	26672667
chr1	26672670
chr1	26679972
chr1	26680112
chr1	26680530
chr1	26688642
chr1	26688771
chr1	26689069
chr1	26689108
chr1	26689386
chr1	26689570
chr1	26689624
chr1	26690032
chr1	26690318
chr1	26690380
chr1	26690458
chr1	26695280
chr1	26695301
chr1	26695711
chr1	26695928
chr1	26700942
chr1	26702632
chr1	26702715
chr1	26704452
chr1	26704481
chr1	26704616
chr1	26704639
chr1	26705037
chr1	26705043
chr1	26705212
chr1	26705213
chr1	26705214
chr1	26710478
chr1	26712764
chr1	26713734
chr1	26713933
chr1	26714282
chr1	26716520
chr1	26732042
chr1	26732285
chr1	26732390
chr1	26732837
chr1	26733066
chr1	26733221
chr1	26733396
chr1	26743925
chr1	26744654
chr1	26744666
chr1	26745552
chr1	26745859
chr1	26745900
chr1	26745901
chr1	26745907
chr1	26746015
chr1	26746175
chr1	26762418
chr1	26762440
chr1	26762456
chr1	26762718
chr1	26762899
chr1	26762935
chr1	26763096
chr1	26763152
chr1	26763155
chr1	26763183
chr1	26763400
chr1	26763424
chr1	26763465
chr1	26763602
chr1	26763639
chr1	26764445
chr1	26764772
chr1	26764997
chr1	26769014
chr1	26773536
chr1	26782951
chr1	26783198
chr1	26783222
chr1	26783834
chr1	26783875
chr1	26783883
chr1	26783921
chr1	26783933
chr1	26784023
chr1	26784322
chr1	26785097
chr1	26785171
chr1	26785203
chr1	26785264
chr1	26785333
chr1	26785488
chr1	26785493
chr1	26785517
chr1	26785658
chr1	26786058
chr1	26786070
chr1	26786217
chr1	26786265
chr1	26786732
chr1	26786853
chr1	26786854
chr1	26786855
chr1	26787099
chr1	26787302
chr1	26788283
chr1	26788346
chr1	26788478
chr1	26788922
chr1	26789048
chr1	26789260
chr1	26789309
chr1	26789358
chr1	26789372
chr1	26789463
chr1	26789520
chr1	26789542
chr1	26789596
chr1	26789823
chr1	26790962
chr1	26790987
chr1	26791053
chr1	26791062
chr1	26791107
chr1	26791146
chr1	26791329
chr1	26791359
chr1	26791389
chr1	26791500
chr1	26791569
chr1	26791680
chr1	26791691
chr1	26791695
chr1	26791821
chr1	26791830
chr1	26791839
chr1	26792157
chr1	26792262
chr1	26792280
chr1	26792285
chr1	26792545
chr1	26792581
chr1	26792650
chr1	26792660
chr1	26792775
chr1	26794552
chr1	26794751
chr1	26795762
chr1	26796097
chr1	26799897
chr1	26803392
chr1	26805589
chr1	26805649
chr1	26805703
chr1	26805704
chr1	26805735
chr1	26805816
chr1	26805963
chr1	26805994
chr1	26806011
chr1	26806257
chr1	26806421
chr1	26806422
chr1	26806584
chr1	26806632
chr1	26806683
chr1	26806695
chr1	26806704
chr1	26806736
chr1	26806860
chr1	26806898
chr1	26806965
chr1	26806999
chr1	26807112
chr1	26807662
chr1	26807724
chr1	26807731
chr1	26807809
chr1	26807821
chr1	26807824
chr1	26807878
chr1	26807896
chr1	26807977
chr1	26808079
chr1	26808082
chr1	26808097
chr1	26808157
chr1	26808962
chr1	26810494
chr1	26810670
chr1	26813498
chr1	26814661
chr1	26818635
chr1	26820711
chr1	26822852
chr1	26822866
chr1	26822975
chr1	26825220
chr1	26825221
chr1	26832793
chr1	26833099
chr1	26833566
chr1	26833567
chr1	26833847
chr1	26841762
chr1	26842779
chr1	26858855
chr1	26859530
chr1	26861564
chr1	26861584
chr1	26862680
chr1	26863307
chr1	26863377
chr1	26864156
chr1	26866505
chr1	26866546
chr1	26868024
chr1	26870043
chr1	26870044
chr1	26871744
chr1	26878711
chr1	26884131
chr1	26884600
chr1	26884760
chr1	26885032
chr1	26885192
chr1	26885579
chr1	26887418
chr1	26887619
chr1	26887671
chr1	26887672
chr1	26887715
chr1	26887925
chr1	26887994
chr1	26888083
chr1	26888168
chr1	26888381
chr1	26889206
chr1	26889243
chr1	26889288
chr1	26889378
chr1	26889633
chr1	26891146
chr1	26892502
chr1	26893893
chr1	26894125
chr1	26898980
chr1	26899346
chr1	26900067
chr1	26900070
chr1	26900160
chr1	26900325
chr1	26900334
chr1	26900358
chr1	26900548
chr1	26900615
chr1	26900630
chr1	26900737
chr1	26900801
chr1	26900825
chr1	26901088
chr1	26901211
chr1	26910012
chr1	26910180
chr1	26910199
chr1	26910384
chr1	26910601
chr1	26910889
chr1	26911236
chr1	26911269
chr1	26911653
chr1	26911674
chr1	26911776
chr1	26912491
chr1	26912766
chr1	26912850
chr1	26912980
chr1	26913014
chr1	26913025
chr1	26913051
chr1	26913059
chr1	26913069
chr1	26913104
chr1	26913217
chr1	26913253
chr1	26913259
chr1	26913389
chr1	26913470
chr1	26913558
chr1	26913561
chr1	26913580
chr1	26913739
chr1	26913741
chr1	26913784
chr1	26913857
chr1	26913865
chr1	26914107
chr1	26914350
chr1	26914371
chr1	26914615
chr1	26914899
chr1	26914938
chr1	26914962
chr1	26915345
chr1	26915348
chr1	26915785
chr1	26915959
chr1	26915977
chr1	26916213
chr1	26916218
chr1	26916225
chr1	26916280
chr1	26916396
chr1	26916447
chr1	26916452
chr1	26916516
chr1	26916528
chr1	26916690
chr1	26916691
chr1	26916712
chr1	26916839
chr1	26916875
chr1	26916899
chr1	26917185
chr1	26917201
chr1	26917272
chr1	26917291
chr1	26917395
chr1	26917414
chr1	26917417
chr1	26917891
chr1	26920593
chr1	26920659
chr1	26920662
chr1	26928497
chr1	26928565
chr1	26928621
chr1	26928791
chr1	26928804
chr1	26928964
chr1	26928992
chr1	26929315
chr1	26929750
chr1	26929753
chr1	26929981
chr1	26930071
chr1	26933948
chr1	26934220
chr1	26934470
chr1	26940011
chr1	26940120
chr1	26941869
chr1	26942081
chr1	26964566
chr1	26964586
chr1	26964619
chr1	26964710
chr1	26964712
chr1	26964865
chr1	26965671
chr1	26966050
chr1	26967254
chr1	26968992
chr1	26969463
chr1	26972895
chr1	26973654
chr1	26974245
chr1	26976622
chr1	26976654
chr1	26984556
chr1	26986737
chr1	26986814
chr1	26996089
chr1	26998937
chr1	27001469
chr1	27004349
chr1	27005315
chr1	27006260
chr1	27007676
chr1	27010615
chr1	27017045
chr1	27020437
chr1	27024629
chr1	27024743
chr1	27025014
chr1	27027911
chr1	27028134
chr1	27028158
chr1	27028740
chr1	27028950
chr1	27029869
chr1	27030270
chr1	27061795
chr1	27064456
chr1	27065275
chr1	27069033
chr1	27079548
chr1	27080769
chr1	27087826
chr1	27087990
chr1	27107711
chr1	27108363
chr1	27108366
chr1	27108549
chr1	27108812
chr1	27108855
chr1	27108890
chr1	27109039
chr1	27109181
chr1	27109363
chr1	27109617
chr1	27109868
chr1	27112034
chr1	27112104
chr1	27113571
chr1	27113910
chr1	27115177
chr1	27115190
chr1	27115398
chr1	27115413
chr1	27115416
chr1	27115464
chr1	27115584
chr1	27115680
chr1	27115873
chr1	27116153
chr1	27116304
chr1	27116455
chr1	27116685
chr1	27116980
chr1	27117150
chr1	27117174
chr1	27117216
chr1	27118955
chr1	27119359
chr1	27119529
chr1	27119539
chr1	27123697
chr1	27125401
chr1	27125876
chr1	27126131
chr1	27126527
chr1	27127859
chr1	27127940
chr1	27128195
chr1	27128263
chr1	27129065
chr1	27132168
chr1	27132890
chr1	27132910
chr1	27132925
chr1	27132928
chr1	27132976
chr1	27133163
chr1	27133181
chr1	27133306
chr1	27133867
chr1	27133873
chr1	27134233
chr1	27134237
chr1	27134373
chr1	27134382
chr1	27134836
chr1	27135335
chr1	27136092
chr1	27139018
chr1	27139205
chr1	27148613
chr1	27148915
chr1	27148916
chr1	27148930
chr1	27148955
chr1	27148964
chr1	27148970
chr1	27149048
chr1	27149814
chr1	27150030
chr1	27150508
chr1	27150514
chr1	27150517
chr1	27150535
chr1	27150559
chr1	27150690
chr1	27153802
chr1	27155085
chr1	27155211
chr1	27155260
chr1	27155446
chr1	27155540
chr1	27156720
chr1	27156722
chr1	27157954
chr1	27158268
chr1	27158437
chr1	27159515
chr1	27159893
chr1	27169384
chr1	27169438
chr1	27169656
chr1	27169916
chr1	27169964
chr1	27170081
chr1	27170541
chr1	27171030
chr1	27201827
chr1	27201909
chr1	27202203
chr1	27214531
chr1	27220450
chr1	27228324
chr1	27228363
chr1	27229521
chr1	27230026
chr1	27230587
chr1	27231038
chr1	27232423
chr1	27232672
chr1	27232777
chr1	27232881
chr1	27234910
chr1	27235150
chr1	27235575
chr1	27235913
chr1	27237112
chr1	27237897
chr1	27238320
chr1	27238321
chr1	27238410
chr1	27238554
chr1	27238555
chr1	27241888
chr1	27242183
chr1	27242225
chr1	27242723
chr1	27242889
chr1	27243575
chr1	27244514
chr1	27244848
chr1	27245531
chr1	27249813
chr1	27250642
chr1	27250956
chr1	27251337
chr1	27251958
chr1	27252549
chr1	27254521
chr1	27254705
chr1	27256302
chr1	27259216
chr1	27259967
chr1	27261944
chr1	27265539
chr1	27268539
chr1	27269804
chr1	27272970
chr1	27273669
chr1	27284436
chr1	27284583
chr1	27286021
chr1	27286294
chr1	27286888
chr1	27287891
chr1	27288119
chr1	27289842
chr1	27296900
chr1	27297419
chr1	27298021
chr1	27308584
chr1	27308685
chr1	27308708
chr1	27308851
chr1	27308973
chr1	27309000
chr1	27309032
chr1	27309041
chr1	27309272
chr1	27309275
chr1	27309452
chr1	27309537
chr1	27309898
chr1	27310596
chr1	27310672
chr1	27310684
chr1	27310708
chr1	27310961
chr1	27312130
chr1	27313607
chr1	27314297
chr1	27314480
chr1	27314639
chr1	27315495
chr1	27316557
chr1	27320351
chr1	27321563
chr1	27321614
chr1	27322131
chr1	27326303
chr1	27326426
chr1	27326485
chr1	27326761
chr1	27327558
chr1	27328007
chr1	27328678
chr1	27329696
chr1	27329817
chr1	27331515
chr1	27332913
chr1	27335997
chr1	27338144
chr1	27338213
chr1	27338285
chr1	27338446
chr1	27338846
chr1	27339235
chr1	27339294
chr1	27339431
chr1	27339650
chr1	27339710
chr1	27339773
chr1	27339833
chr1	27340077
chr1	27340113
chr1	27340237
chr1	27340362
chr1	27340484
chr1	27340485
chr1	27346983
chr1	27347079
chr1	27347131
chr1	27350848
chr1	27351871
chr1	27355230
chr1	27359187
chr1	27359197
chr1	27359481
chr1	27360073
chr1	27360571
chr1	27361544
chr1	27368670
chr1	27370888
chr1	27371615
chr1	27372688
chr1	27373355
chr1	27375636
chr1	27376060
chr1	27376063
chr1	27378442
chr1	27380323
chr1	27382014
chr1	27390846
chr1	27392099
chr1	27392392
chr1	27396292
chr1	27398291
chr1	27398982
chr1	27399000
chr1	27403014
chr1	27403081
chr1	27403213
chr1	27403317
chr1	27403367
chr1	27403489
chr1	27403642
chr1	27403655
chr1	27403732
chr1	27403849
chr1	27403924
chr1	27403942
chr1	27403951
chr1	27403993
chr1	27404008
chr1	27404041
chr1	27404056
chr1	27404068
chr1	27404260
chr1	27404519
chr1	27405593
chr1	27405692
chr1	27405694
chr1	27405781
chr1	27405861
chr1	27405885
chr1	27405927
chr1	27405940
chr1	27405942
chr1	27405973
chr1	27406001
chr1	27406032
chr1	27406260
chr1	27406266
chr1	27406272
chr1	27406290
chr1	27406325
chr1	27406332
chr1	27406453
chr1	27406671
chr1	27406825
chr1	27406894
chr1	27406899
chr1	27406924
chr1	27406930
chr1	27407596
chr1	27423531
chr1	27423535
chr1	27423644
chr1	27424425
chr1	27424925
chr1	27424951
chr1	27425294
chr1	27425459
chr1	27425487
chr1	27425514
chr1	27425736
chr1	27425821
chr1	27425833
chr1	27425948
chr1	27425959
chr1	27425994
chr1	27426077
chr1	27432318
chr1	27432331
chr1	27432565
chr1	27432793
chr1	27438051
chr1	27439607
chr1	27439650
chr1	27440201
chr1	27440218
chr1	27440237
chr1	27440247
chr1	27440291
chr1	27440306
chr1	27440319
chr1	27442371
chr1	27442415
chr1	27443070
chr1	27443250
chr1	27443349
chr1	27443619
chr1	27444141
chr1	27444203
chr1	27444328
chr1	27444495
chr1	27444554
chr1	27444557
chr1	27444601
chr1	27444658
chr1	27444679
chr1	27444747
chr1	27444764
chr1	27444770
chr1	27444898
chr1	27444935
chr1	27445074
chr1	27445448
chr1	27445845
chr1	27448169
chr1	27454735
chr1	27455482
chr1	27455822
chr1	27455914
chr1	27457585
chr1	27457669
chr1	27458485
chr1	27458619
chr1	27458928
chr1	27459155
chr1	27459192
chr1	27459206
chr1	27459242
chr1	27459267
chr1	27459291
chr1	27459603
chr1	27459773
chr1	27459946
chr1	27460109
chr1	27460654
chr1	27460822
chr1	27461625
chr1	27464709
chr1	27464939
chr1	27465007
chr1	27465089
chr1	27465405
chr1	27465559
chr1	27466076
chr1	27473442
chr1	27474550
chr1	27481840
chr1	27481889
chr1	27482185
chr1	27482235
chr1	27482454
chr1	27482841
chr1	27483117
chr1	27484587
chr1	27484612
chr1	27484677
chr1	27484889
chr1	27485950
chr1	27486033
chr1	27488045
chr1	27488214
chr1	27488277
chr1	27488763
chr1	27489407
chr1	27489662
chr1	27490440
chr1	27490446
chr1	27490482
chr1	27490552
chr1	27490749
chr1	27491498
chr1	27491659
chr1	27492903
chr1	27493061
chr1	27493275
chr1	27493297
chr1	27493355
chr1	27493450
chr1	27493551
chr1	27493947
chr1	27494054
chr1	27494665
chr1	27494922
chr1	27495479
chr1	27495771
chr1	27496441
chr1	27496583
chr1	27496599
chr1	27497271
chr1	27497285
chr1	27497339
chr1	27497617
chr1	27497780
chr1	27497788
chr1	27497856
chr1	27499216
chr1	27499254
chr1	27499363
chr1	27499402
chr1	27499525
chr1	27499744
chr1	27499752
chr1	27499835
chr1	27499889
chr1	27499923
chr1	27499934
chr1	27500009
chr1	27500153
chr1	27500183
chr1	27500217
chr1	27500223
chr1	27500343
chr1	27500372
chr1	27500517
chr1	27500661
chr1	27500751
chr1	27500875
chr1	27501282
chr1	27501324
chr1	27501787
chr1	27505212
chr1	27511661
chr1	27514634
chr1	27514690
chr1	27514895
chr1	27514937
chr1	27517359
chr1	27518965
chr1	27519498
chr1	27520902
chr1	27521007
chr1	27521483
chr1	27521488
chr1	27521526
chr1	27521541
chr1	27522083
chr1	27522097
chr1	27522098
chr1	27522569
chr1	27522705
chr1	27523285
chr1	27524592
chr1	27525241
chr1	27525243
chr1	27525387
chr1	27526627
chr1	27527991
chr1	27528023
chr1	27528240
chr1	27528614
chr1	27528686
chr1	27529197
chr1	27529290
chr1	27529445
chr1	27530523
chr1	27530608
chr1	27530766
chr1	27530850
chr1	27539704
chr1	27539780
chr1	27540119
chr1	27541201
chr1	27541562
chr1	27542403
chr1	27542540
chr1	27544324
chr1	27544393
chr1	27545217
chr1	27545552
chr1	27562635
chr1	27562865
chr1	27563200
chr1	27563753
chr1	27563879
chr1	27563986
chr1	27565018
chr1	27566296
chr1	27575540
chr1	27576189
chr1	27576391
chr1	27578820
chr1	27579375
chr1	27579798
chr1	27580022
chr1	27580235
chr1	27584867
chr1	27586650
chr1	27589092
chr1	27589098
chr1	27589240
chr1	27589249
chr1	27589645
chr1	27589648
chr1	27589704
chr1	27589755
chr1	27589957
chr1	27590089
chr1	27590353
chr1	27590745
chr1	27591007
chr1	27591022
chr1	27591230
chr1	27591396
chr1	27591600
chr1	27591814
chr1	27592445
chr1	27592733
chr1	27593494
chr1	27593775
chr1	27594008
chr1	27595150
chr1	27598711
chr1	27598936
chr1	27598999
chr1	27599514
chr1	27599870
chr1	27603873
chr1	27604070
chr1	27604130
chr1	27604507
chr1	27605076
chr1	27605230
chr1	27605247
chr1	27605459
chr1	27605947
chr1	27606822
chr1	27607274
chr1	27608101
chr1	27608176
chr1	27608282
chr1	27608973
chr1	27609733
chr1	27609844
chr1	27610098
chr1	27610325
chr1	27610599
chr1	27611520
chr1	27611707
chr1	27611783
chr1	27612646
chr1	27612880
chr1	27612897
chr1	27613263
chr1	27613689
chr1	27613756
chr1	27614241
chr1	27614515
chr1	27614717
chr1	27615379
chr1	27616112
chr1	27618818
chr1	27618819
chr1	27619744
chr1	27620355
chr1	27620577
chr1	27620635
chr1	27622211
chr1	27623080
chr1	27624050
chr1	27624095
chr1	27624933
chr1	27625137
chr1	27625313
chr1	27625510
chr1	27625631
chr1	27625842
chr1	27626642
chr1	27626735
chr1	27627410
chr1	27627755
chr1	27627762
chr1	27627917
chr1	27629364
chr1	27629395
chr1	27629418
chr1	27629448
chr1	27629484
chr1	27629565
chr1	27629664
chr1	27629677
chr1	27629766
chr1	27629834
chr1	27631003
chr1	27631054
chr1	27631419
chr1	27631432
chr1	27632201
chr1	27632388
chr1	27632553
chr1	27633508
chr1	27633571
chr1	27633733
chr1	27633772
chr1	27635626
chr1	27635795
chr1	27639530
chr1	27639581
chr1	27639614
chr1	27639653
chr1	27639779
chr1	27639800
chr1	27639842
chr1	27639848
chr1	27640031
chr1	27640058
chr1	27645351
chr1	27646416
chr1	27646559
chr1	27646615
chr1	27648375
chr1	27651228
chr1	27651895
chr1	27652407
chr1	27653012
chr1	27653133
chr1	27653212
chr1	27653539
chr1	27653561
chr1	27654058
chr1	27670726
chr1	27670788
chr1	27672502
chr1	27672712
chr1	27672867
chr1	27682847
chr1	27689501
chr1	27689988
chr1	27690471
chr1	27690905
chr1	27691937
chr1	27692054
chr1	27692404
chr1	27693027
chr1	27695951
chr1	27696889
chr1	27697026
chr1	27704047
chr1	27704079
chr1	27704613
chr1	27706123
chr1	27706132
chr1	27706302
chr1	27706871
chr1	27706975
chr1	27707095
chr1	27707263
chr1	27707363
chr1	27723333
chr1	27723673
chr1	27723984
chr1	27724181
chr1	27724188
chr1	27724289
chr1	27724615
chr1	27724756
chr1	27725478
chr1	27726306
chr1	27727623
chr1	27728951
chr1	27730403
chr1	27730795
chr1	27732471
chr1	27734879
chr1	27734885
chr1	27734909
chr1	27734966
chr1	27735201
chr1	27735245
chr1	27735335
chr1	27735688
chr1	27735946
chr1	27738198
chr1	27738451
chr1	27738529
chr1	27739429
chr1	27740608
chr1	27743291
chr1	27744739
chr1	27745348
chr1	27755479
chr1	27764352
chr1	27765133
chr1	27766254
chr1	27781259
chr1	27781933
chr1	27782790
chr1	27783622
chr1	27783853
chr1	27785147
chr1	27786271
chr1	27786441
chr1	27787663
chr1	27787920
chr1	27788602
chr1	27790444
chr1	27792617
chr1	27793860
chr1	27815889
chr1	27815890
chr1	27817132
chr1	27817614
chr1	27818085
chr1	27818620
chr1	27819186
chr1	27819252
chr1	27820172
chr1	27821044
chr1	27821845
chr1	27823170
chr1	27825690
chr1	27825925
chr1	27827785
chr1	27828848
chr1	27829311
chr1	27831213
chr1	27832305
chr1	27840984
chr1	27842427
chr1	27842846
chr1	27845321
chr1	27845395
chr1	27847097
chr1	27847120
chr1	27848042
chr1	27848168
chr1	27849408
chr1	27849872
chr1	27849929
chr1	27850095
chr1	27850120
chr1	27850171
chr1	27850231
chr1	27850422
chr1	27850484
chr1	27850852
chr1	27850862
chr1	27851053
chr1	27851062
chr1	27851192
chr1	27851261
chr1	27851852
chr1	27852421
chr1	27864025
chr1	27864425
chr1	27865305
chr1	27865467
chr1	27871839
chr1	27872086
chr1	27873060
chr1	27883408
chr1	27886530
chr1	27886842
chr1	27886868
chr1	27886876
chr1	27887042
chr1	27887059
chr1	27887294
chr1	27888088
chr1	27888121
chr1	27888630
chr1	27889306
chr1	27890339
chr1	27890788
chr1	27892099
chr1	27892298
chr1	27892862
chr1	27893227
chr1	27893355
chr1	27894139
chr1	27895367
chr1	27895406
chr1	27895523
chr1	27895524
chr1	27896176
chr1	27907927
chr1	27908264
chr1	27909708
chr1	27909709
chr1	27909873
chr1	27911294
chr1	27915447
chr1	27916054
chr1	27916453
chr1	27916558
chr1	27916563
chr1	27917738
chr1	27918052
chr1	27918329
chr1	27920467
chr1	27920888
chr1	27921642
chr1	27921683
chr1	27921823
chr1	27922476
chr1	27922994
chr1	27923788
chr1	27924180
chr1	27924553
chr1	27925161
chr1	27925288
chr1	27925291
chr1	27925330
chr1	27925345
chr1	27925381
chr1	27928227
chr1	27928245
chr1	27928247
chr1	27928267
chr1	27928395
chr1	27928452
chr1	27928615
chr1	27928920
chr1	27929808
chr1	27929810
chr1	27929811
chr1	27930110
chr1	27930885
chr1	27930918
chr1	27934198
chr1	27934437
chr1	27937616
chr1	27939725
chr1	27939731
chr1	27939800
chr1	27939881
chr1	27941573
chr1	27942011
chr1	27942022
chr1	27942045
chr1	27942119
chr1	27942612
chr1	27942797
chr1	27942834
chr1	27942852
chr1	27942884
chr1	27942885
chr1	27942891
chr1	27943044
chr1	27943055
chr1	27943518
chr1	27943848
chr1	27944118
chr1	27944269
chr1	27944287
chr1	27944724
chr1	27944880
chr1	27945618
chr1	27945677
chr1	27945959
chr1	27946150
chr1	27946593
chr1	27946718
chr1	27948136
chr1	27948151
chr1	27948191
chr1	27948269
chr1	27948873
chr1	27948965
chr1	27949392
chr1	27949590
chr1	27949667
chr1	27949719
chr1	27949872
chr1	27949925
chr1	27950203
chr1	27950222
chr1	27950357
chr1	27950537
chr1	27950741
chr1	27955049
chr1	27957764
chr1	27959746
chr1	27961153
chr1	27961766
chr1	27962654
chr1	27964170
chr1	27964196
chr1	27964446
chr1	27964452
chr1	27965317
chr1	27965870
chr1	27966557
chr1	27966736
chr1	27966997
chr1	27967016
chr1	27968507
chr1	27982769
chr1	27983081
chr1	27983171
chr1	27983312
chr1	27983321
chr1	27983426
chr1	27983432
chr1	27983441
chr1	27983502
chr1	27983505
chr1	27983534
chr1	27983537
chr1	27983570
chr1	27983633
chr1	27983707
chr1	27983891
chr1	27984110
chr1	27984126
chr1	27984387
chr1	27984390
chr1	27984414
chr1	27984421
chr1	27984467
chr1	27984488
chr1	27984489
chr1	27984920
chr1	27985103
chr1	27991959
chr1	27992467
chr1	27992468
chr1	27992900
chr1	27992962
chr1	27995702
chr1	27996440
chr1	27998232
chr1	27998735
chr1	28005486
chr1	28005585
chr1	28006502
chr1	28006640
chr1	28006955
chr1	28007351
chr1	28008862
chr1	28009139
chr1	28009601
chr1	28009692
chr1	28009693
chr1	28009759
chr1	28009816
chr1	28010976
chr1	28011804
chr1	28011825
chr1	28013331
chr1	28016836
chr1	28022911
chr1	28023074
chr1	28025752
chr1	28026320
chr1	28032767
chr1	28033149
chr1	28034625
chr1	28041234
chr1	28041444
chr1	28041686
chr1	28052768
chr1	28059302
chr1	28059303
chr1	28062312
chr1	28062529
chr1	28064206
chr1	28064560
chr1	28065681
chr1	28066160
chr1	28066350
chr1	28066481
chr1	28070388
chr1	28071523
chr1	28073629
chr1	28076543
chr1	28076597
chr1	28076633
chr1	28077944
chr1	28078136
chr1	28078531
chr1	28079054
chr1	28079849
chr1	28086847
chr1	28087125
chr1	28087557
chr1	28087656
chr1	28088230
chr1	28089410
chr1	28095920
chr1	28096546
chr1	28097847
chr1	28097979
chr1	28100322
chr1	28100413
chr1	28100636
chr1	28100637
chr1	28100904
chr1	28100919
chr1	28100920
chr1	28100938
chr1	28100956
chr1	28100983
chr1	28101043
chr1	28101070
chr1	28101112
chr1	28101118
chr1	28101271
chr1	28101324
chr1	28101337
chr1	28101349
chr1	28101355
chr1	28101406
chr1	28101409
chr1	28101487
chr1	28101490
chr1	28101673
chr1	28101717
chr1	28101966
chr1	28102011
chr1	28102079
chr1	28102413
chr1	28102493
chr1	28102594
chr1	28104025
chr1	28104322
chr1	28104388
chr1	28104456
chr1	28104481
chr1	28104654
chr1	28104683
chr1	28104879
chr1	28117271
chr1	28118881
chr1	28118933
chr1	28119124
chr1	28119703
chr1	28120343
chr1	28121131
chr1	28121796
chr1	28121841
chr1	28121994
chr1	28122015
chr1	28125128
chr1	28134538
chr1	28135660
chr1	28136134
chr1	28136210
chr1	28136604
chr1	28136776
chr1	28138650
chr1	28139744
chr1	28140188
chr1	28142469
chr1	28144842
chr1	28144881
chr1	28146678
chr1	28148837
chr1	28152033
chr1	28152053
chr1	28152805
chr1	28154412
chr1	28155953
chr1	28157701
chr1	28157752
chr1	28158311
chr1	28166678
chr1	28166713
chr1	28166886
chr1	28167135
chr1	28169633
chr1	28169735
chr1	28170031
chr1	28171706
chr1	28172495
chr1	28186673
chr1	28186928
chr1	28186982
chr1	28187051
chr1	28187083
chr1	28187086
chr1	28187230
chr1	28192086
chr1	28192939
chr1	28192980
chr1	28193120
chr1	28194273
chr1	28194286
chr1	28194417
chr1	28194425
chr1	28194435
chr1	28194571
chr1	28194579
chr1	28194657
chr1	28194669
chr1	28194683
chr1	28194858
chr1	28194975
chr1	28195015
chr1	28195101
chr1	28195218
chr1	28195227
chr1	28196404
chr1	28196411
chr1	28197217
chr1	28198039
chr1	28199044
chr1	28199850
chr1	28200124
chr1	28200894
chr1	28201747
chr1	28201804
chr1	28202105
chr1	28202110
chr1	28202844
chr1	28203032
chr1	28203869
chr1	28203990
chr1	28203991
chr1	28204239
chr1	28204955
chr1	28205130
chr1	28205222
chr1	28205229
chr1	28207316
chr1	28208094
chr1	28212138
chr1	28212139
chr1	28212484
chr1	28212853
chr1	28212888
chr1	28212942
chr1	28213087
chr1	28213311
chr1	28214446
chr1	28214761
chr1	28214944
chr1	28215640
chr1	28215700
chr1	28215844
chr1	28215906
chr1	28216096
chr1	28216533
chr1	28217424
chr1	28217783
chr1	28217819
chr1	28217923
chr1	28218064
chr1	28218154
chr1	28219865
chr1	28220725
chr1	28222402
chr1	28222851
chr1	28223795
chr1	28224064
chr1	28224366
chr1	28224371
chr1	28224414
chr1	28225114
chr1	28225714
chr1	28226229
chr1	28227136
chr1	28227527
chr1	28228811
chr1	28231995
chr1	28234541
chr1	28234654
chr1	28234854
chr1	28241228
chr1	28250312
chr1	28251260
chr1	28251270
chr1	28254942
chr1	28256762
chr1	28262387
chr1	28262466
chr1	28263495
chr1	28264017
chr1	28264471
chr1	28264864
chr1	28265077
chr1	28267048
chr1	28267892
chr1	28268857
chr1	28268874
chr1	28270179
chr1	28270919
chr1	28271875
chr1	28272739
chr1	28272796
chr1	28275421
chr1	28276700
chr1	28276745
chr1	28277846
chr1	28278666
chr1	28278672
chr1	28279011
chr1	28279506
chr1	28281684
chr1	28281760
chr1	28281976
chr1	28282020
chr1	28282523
chr1	28282684
chr1	28283613
chr1	28297242
chr1	28305440
chr1	28305474
chr1	28305547
chr1	28305574
chr1	28307335
chr1	28313639
chr1	28314640
chr1	28315305
chr1	28315680
chr1	28316649
chr1	28316802
chr1	28317258
chr1	28317697
chr1	28335747
chr1	28336696
chr1	28337157
chr1	28337245
chr1	28347596
chr1	28347793
chr1	28367424
chr1	28371780
chr1	28372242
chr1	28372430
chr1	28373107
chr1	28377583
chr1	28401451
chr1	28401831
chr1	28412582
chr1	28412925
chr1	28413929
chr1	28414046
chr1	28414098
chr1	28414533
chr1	28415274
chr1	28415371
chr1	28415902
chr1	28417144
chr1	28417152
chr1	28417353
chr1	28417398
chr1	28417434
chr1	28417520
chr1	28417743
chr1	28418144
chr1	28418159
chr1	28418177
chr1	28418312
chr1	28418326
chr1	28418423
chr1	28418732
chr1	28418795
chr1	28418825
chr1	28419163
chr1	28419166
chr1	28419178
chr1	28419354
chr1	28419374
chr1	28422269
chr1	28422975
chr1	28423013
chr1	28423027
chr1	28429066
chr1	28429120
chr1	28429740
chr1	28429767
chr1	28429817
chr1	28430161
chr1	28430405
chr1	28430444
chr1	28430570
chr1	28430684
chr1	28430699
chr1	28430857
chr1	28430999
chr1	28431032
chr1	28436868
chr1	28438751
chr1	28441659
chr1	28441661
chr1	28441963
chr1	28446777
chr1	28448351
chr1	28450126
chr1	28450722
chr1	28451067
chr1	28458966
chr1	28459981
chr1	28460064
chr1	28460400
chr1	28460921
chr1	28461494
chr1	28461890
chr1	28461896
chr1	28461908
chr1	28462137
chr1	28462206
chr1	28462359
chr1	28462570
chr1	28463955
chr1	28465380
chr1	28466430
chr1	28466513
chr1	28466551
chr1	28466623
chr1	28466870
chr1	28469700
chr1	28469746
chr1	28470175
chr1	28470256
chr1	28470400
chr1	28470429
chr1	28470475
chr1	28470666
chr1	28470894
chr1	28472271
chr1	28472332
chr1	28472457
chr1	28474352
chr1	28476884
chr1	28477524
chr1	28477555
chr1	28477693
chr1	28479572
chr1	28479608
chr1	28479978
chr1	28480197
chr1	28481101
chr1	28482038
chr1	28482159
chr1	28482970
chr1	28483724
chr1	28484334
chr1	28484359
chr1	28484416
chr1	28485036
chr1	28485290
chr1	28485586
chr1	28515242
chr1	28515415
chr1	28515442
chr1	28515516
chr1	28516774
chr1	28517055
chr1	28517948
chr1	28518228
chr1	28518233
chr1	28518294
chr1	28518297
chr1	28519016
chr1	28519156
chr1	28519488
chr1	28519503
chr1	28519551
chr1	28527977
chr1	28529353
chr1	28529963
chr1	28530514
chr1	28530525
chr1	28536139
chr1	28538132
chr1	28538141
chr1	28538147
chr1	28538348
chr1	28538351
chr1	28539091
chr1	28539243
chr1	28539264
chr1	28539276
chr1	28539511
chr1	28539675
chr1	28539993
chr1	28541508
chr1	28541646
chr1	28541986
chr1	28542048
chr1	28542336
chr1	28543112
chr1	28543675
chr1	28543755
chr1	28543908
chr1	28545297
chr1	28546502
chr1	28546829
chr1	28547461
chr1	28549064
chr1	28549068
chr1	28549091
chr1	28549092
chr1	28555189
chr1	28555278
chr1	28555326
chr1	28559648
chr1	28560010
chr1	28560286
chr1	28572104
chr1	28573101
chr1	28573242
chr1	28573398
chr1	28573964
chr1	28574485
chr1	28574709
chr1	28574710
chr1	28576752
chr1	28577239
chr1	28577341
chr1	28577342
chr1	28584563
chr1	28585223
chr1	28586136
chr1	28586216
chr1	28591198
chr1	28591212
chr1	28591233
chr1	28593401
chr1	28594080
chr1	28594481
chr1	28618254
chr1	28619587
chr1	28619960
chr1	28627318
chr1	28631772
chr1	28632234
chr1	28633515
chr1	28634048
chr1	28635062
chr1	28635121
chr1	28635488
chr1	28636442
chr1	28641462
chr1	28643201
chr1	28645169
chr1	28645170
chr1	28645616
chr1	28645619
chr1	28645845
chr1	28651315
chr1	28653020
chr1	28653407
chr1	28654247
chr1	28654336
chr1	28654367
chr1	28655926
chr1	28658067
chr1	28658644
chr1	28659857
chr1	28682142
chr1	28683624
chr1	28684949
chr1	28685076
chr1	28685414
chr1	28685980
chr1	28686566
chr1	28687497
chr1	28688978
chr1	28696022
chr1	28696025
chr1	28696031
chr1	28697725
chr1	28709889
chr1	28710485
chr1	28711602
chr1	28716327
chr1	28716564
chr1	28717245
chr1	28717825
chr1	28723553
chr1	28724228
chr1	28726032
chr1	28728338
chr1	28728339
chr1	28734630
chr1	28734707
chr1	28734710
chr1	28735838
chr1	28737210
chr1	28737211
chr1	28737219
chr1	28737386
chr1	28741178
chr1	28741273
chr1	28741279
chr1	28741320
chr1	28741330
chr1	28741342
chr1	28741348
chr1	28741372
chr1	28741450
chr1	28741574
chr1	28747220
chr1	28747487
chr1	28747627
chr1	28747763
chr1	28759999
chr1	28760116
chr1	28760660
chr1	28763340
chr1	28763612
chr1	28763904
chr1	28764138
chr1	28764242
chr1	28764340
chr1	28765096
chr1	28765159
chr1	28767224
chr1	28767376
chr1	28771073
chr1	28771293
chr1	28777413
chr1	28777425
chr1	28777680
chr1	28777821
chr1	28777890
chr1	28777920
chr1	28778037
chr1	28778357
chr1	28779302
chr1	28780137
chr1	28780247
chr1	28780464
chr1	28783083
chr1	28783471
chr1	28784398
chr1	28784687
chr1	28784752
chr1	28785147
chr1	28785398
chr1	28785904
chr1	28786016
chr1	28786105
chr1	28786115
chr1	28786690
chr1	28786912
chr1	28787178
chr1	28787576
chr1	28787994
chr1	28788316
chr1	28791009
chr1	28791329
chr1	28794316
chr1	28794339
chr1	28797384
chr1	28798008
chr1	28798098
chr1	28798263
chr1	28798596
chr1	28798597
chr1	28798882
chr1	28799108
chr1	28799794
chr1	28800224
chr1	28804528
chr1	28804628
chr1	28808449
chr1	28808457
chr1	28815123
chr1	28819334
chr1	28831304
chr1	28837786
chr1	28838479
chr1	28839962
chr1	28849256
chr1	28865459
chr1	28865531
chr1	28865648
chr1	28866019
chr1	28873166
chr1	28873604
chr1	28875162
chr1	28882344
chr1	28883353
chr1	28883994
chr1	28889216
chr1	28889514
chr1	28889711
chr1	28889946
chr1	28890074
chr1	28890681
chr1	28893047
chr1	28893350
chr1	28893448
chr1	28893453
chr1	28893469
chr1	28896212
chr1	28896532
chr1	28906666
chr1	28906668
chr1	28908815
chr1	28908882
chr1	28910165
chr1	28922939
chr1	28923115
chr1	28923143
chr1	28924677
chr1	28926323
chr1	28926334
chr1	28927213
chr1	28932239
chr1	28934373
chr1	28934574
chr1	28934727
chr1	28935159
chr1	28936710
chr1	28936924
chr1	28936934
chr1	28941028
chr1	28941029
chr1	28941091
chr1	28941465
chr1	28941537
chr1	28941627
chr1	28942075
chr1	28942089
chr1	28942218
chr1	28942245
chr1	28942254
chr1	28942275
chr1	28942296
chr1	28942321
chr1	28942379
chr1	28942395
chr1	28942403
chr1	28944494
chr1	28944631
chr1	28944641
chr1	28947732
chr1	28948276
chr1	28948296
chr1	28948305
chr1	28948493
chr1	28948671
chr1	28948704
chr1	28949378
chr1	28949979
chr1	28950015
chr1	28950024
chr1	28950074
chr1	28950132
chr1	28950387
chr1	28950402
chr1	28950480
chr1	28950510
chr1	28950555
chr1	28950600
chr1	28950900
chr1	28950906
chr1	28950924
chr1	28950927
chr1	28951017
chr1	28951299
chr1	28951335
chr1	28951341
chr1	28951365
chr1	28951552
chr1	28951936
chr1	28952263
chr1	28952272
chr1	28952348
chr1	28956061
chr1	28956243
chr1	28956862
chr1	28956991
chr1	28957431
chr1	28957503
chr1	28957740
chr1	28958510
chr1	28959529
chr1	28959655
chr1	28966093
chr1	28975790
chr1	28976419
chr1	28976808
chr1	28976829
chr1	28976865
chr1	28976916
chr1	28977228
chr1	28977231
chr1	28977624
chr1	28977822
chr1	28978907
chr1	28979002
chr1	28980313
chr1	28981287
chr1	28981759
chr1	28981773
chr1	28982143
chr1	28982226
chr1	28982670
chr1	28983416
chr1	28984024
chr1	28985983
chr1	28986320
chr1	28987235
chr1	28987842
chr1	28990924
chr1	28991689
chr1	28998944
chr1	28999450
chr1	29000471
chr1	29001306
chr1	29001732
chr1	29001734
chr1	29002089
chr1	29010208
chr1	29010477
chr1	29010864
chr1	29012870
chr1	29016611
chr1	29016924
chr1	29017251
chr1	29017426
chr1	29019706
chr1	29021537
chr1	29022127
chr1	29023838
chr1	29023842
chr1	29024445
chr1	29024446
chr1	29024447
chr1	29024986
chr1	29025279
chr1	29026411
chr1	29026539
chr1	29026669
chr1	29031262
chr1	29031333
chr1	29031967
chr1	29031991
chr1	29033598
chr1	29038671
chr1	29038722
chr1	29038870
chr1	29038900
chr1	29039818
chr1	29039976
chr1	29040592
chr1	29041439
chr1	29042735
chr1	29043091
chr1	29043771
chr1	29044297
chr1	29044908
chr1	29044981
chr1	29045883
chr1	29046469
chr1	29046544
chr1	29047894
chr1	29048013
chr1	29051579
chr1	29051716
chr1	29051879
chr1	29053148
chr1	29053383
chr1	29054062
chr1	29054742
chr1	29054756
chr1	29055474
chr1	29055808
chr1	29056322
chr1	29056323
chr1	29059396
chr1	29060212
chr1	29060343
chr1	29061588
chr1	29070536
chr1	29070595
chr1	29070835
chr1	29070990
chr1	29071126
chr1	29071161
chr1	29071289
chr1	29071459
chr1	29071652
chr1	29072155
chr1	29072755
chr1	29073183
chr1	29073188
chr1	29073237
chr1	29073390
chr1	29073393
chr1	29074758
chr1	29086046
chr1	29086742
chr1	29087287
chr1	29087392
chr1	29088183
chr1	29088419
chr1	29088465
chr1	29090141
chr1	29090833
chr1	29093704
chr1	29095579
chr1	29095580
chr1	29096736
chr1	29097146
chr1	29097608
chr1	29100376
chr1	29100393
chr1	29100435
chr1	29101155
chr1	29101218
chr1	29104062
chr1	29106356
chr1	29107563
chr1	29109827
chr1	29111757
chr1	29111810
chr1	29112073
chr1	29112371
chr1	29112513
chr1	29114261
chr1	29114819
chr1	29115257
chr1	29115576
chr1	29117203
chr1	29119510
chr1	29119511
chr1	29124130
chr1	29124698
chr1	29128546
chr1	29129496
chr1	29136083
chr1	29136099
chr1	29136192
chr1	29136219
chr1	29136221
chr1	29136300
chr1	29136318
chr1	29136426
chr1	29136504
chr1	29136509
chr1	29136647
chr1	29136672
chr1	29136689
chr1	29136713
chr1	29136729
chr1	29136751
chr1	29136782
chr1	29136785
chr1	29137151
chr1	29137213
chr1	29137232
chr1	29138085
chr1	29138132
chr1	29138471
chr1	29138733
chr1	29138818
chr1	29138901
chr1	29140069
chr1	29140087
chr1	29140650
chr1	29140788
chr1	29141425
chr1	29142388
chr1	29142741
chr1	29142856
chr1	29142861
chr1	29142903
chr1	29142909
chr1	29142915
chr1	29143665
chr1	29143727
chr1	29144461
chr1	29144871
chr1	29149059
chr1	29150407
chr1	29153494
chr1	29155405
chr1	29155840
chr1	29158040
chr1	29161545
chr1	29165233
chr1	29166603
chr1	29166818
chr1	29167061
chr1	29167489
chr1	29167645
chr1	29168497
chr1	29168505
chr1	29168533
chr1	29169309
chr1	29169310
chr1	29170367
chr1	29171089
chr1	29171660
chr1	29172339
chr1	29172735
chr1	29175054
chr1	29179137
chr1	29186094
chr1	29186187
chr1	29186706
chr1	29187668
chr1	29189332
chr1	29189977
chr1	29193419
chr1	29194676
chr1	29194785
chr1	29205455
chr1	29207255
chr1	29207958
chr1	29207965
chr1	29211108
chr1	29211740
chr1	29212161
chr1	29213535
chr1	29220736
chr1	29220937
chr1	29220964
chr1	29220994
chr1	29221206
chr1	29222102
chr1	29222162
chr1	29222753
chr1	29222792
chr1	29223531
chr1	29223922
chr1	29224009
chr1	29230826
chr1	29231018
chr1	29231400
chr1	29231415
chr1	29235922
chr1	29236155
chr1	29238309
chr1	29246230
chr1	29246271
chr1	29247917
chr1	29253764
chr1	29254404
chr1	29254564
chr1	29254673
chr1	29254754
chr1	29255240
chr1	29255632
chr1	29255670
chr1	29255789
chr1	29255913
chr1	29255938
chr1	29256045
chr1	29256149
chr1	29256358
chr1	29257868
chr1	29258424
chr1	29259721
chr1	29261087
chr1	29261729
chr1	29261834
chr1	29261895
chr1	29262094
chr1	29262128
chr1	29269027
chr1	29270178
chr1	29270188
chr1	29270236
chr1	29272614
chr1	29273253
chr1	29273711
chr1	29274113
chr1	29274424
chr1	29274429
chr1	29275167
chr1	29275300
chr1	29284188
chr1	29284221
chr1	29286143
chr1	29286274
chr1	29286354
chr1	29286469
chr1	29286530
chr1	29286612
chr1	29286893
chr1	29286913
chr1	29286915
chr1	29290518
chr1	29290532
chr1	29290606
chr1	29290668
chr1	29293213
chr1	29293226
chr1	29294251
chr1	29294941
chr1	29295616
chr1	29295784
chr1	29298486
chr1	29299335
chr1	29299712
chr1	29299734
chr1	29299943
chr1	29300118
chr1	29300416
chr1	29301148
chr1	29301337
chr1	29301869
chr1	29302070
chr1	29302522
chr1	29303895
chr1	29303966
chr1	29304319
chr1	29304357
chr1	29304358
chr1	29304362
chr1	29305046
chr1	29305293
chr1	29307058
chr1	29307076
chr1	29307336
chr1	29307449
chr1	29307922
chr1	29307964
chr1	29308113
chr1	29308437
chr1	29308524
chr1	29308850
chr1	29309217
chr1	29309221
chr1	29309397
chr1	29309405
chr1	29309432
chr1	29309805
chr1	29309816
chr1	29309987
chr1	29310421
chr1	29310436
chr1	29310530
chr1	29310647
chr1	29310653
chr1	29310682
chr1	29310783
chr1	29328107
chr1	29328615
chr1	29328620
chr1	29329139
chr1	29329205
chr1	29329287
chr1	29329378
chr1	29329862
chr1	29329879
chr1	29329925
chr1	29330011
chr1	29330090
chr1	29330116
chr1	29330533
chr1	29332878
chr1	29334094
chr1	29334682
chr1	29335384
chr1	29335890
chr1	29339521
chr1	29342503
chr1	29346061
chr1	29346100
chr1	29346185
chr1	29346269
chr1	29346561
chr1	29346750
chr1	29347061
chr1	29348887
chr1	29352471
chr1	29355290
chr1	29355320
chr1	29355350
chr1	29355460
chr1	29355538
chr1	29355789
chr1	29355847
chr1	29355945
chr1	29357153
chr1	29357198
chr1	29357204
chr1	29357316
chr1	29357651
chr1	29357666
chr1	29357751
chr1	29357754
chr1	29357761
chr1	29357763
chr1	29357921
chr1	29357981
chr1	29358056
chr1	29358068
chr1	29358071
chr1	29358095
chr1	29358173
chr1	29358211
chr1	29358416
chr1	29364522
chr1	29364556
chr1	29364570
chr1	29365158
chr1	29365161
chr1	29365215
chr1	29365623
chr1	29387861
chr1	29388101
chr1	29388191
chr1	29388260
chr1	29400130
chr1	29400200
chr1	29400513
chr1	29400760
chr1	29401886
chr1	29401890
chr1	29402351
chr1	29403172
chr1	29405034
chr1	29417098
chr1	29417200
chr1	29417263
chr1	29417281
chr1	29417341
chr1	29417525
chr1	29417540
chr1	29417658
chr1	29417708
chr1	29417710
chr1	29417943
chr1	29418036
chr1	29418048
chr1	29418054
chr1	29418772
chr1	29422171
chr1	29428078
chr1	29428219
chr1	29432919
chr1	29432990
chr1	29433389
chr1	29433634
chr1	29433646
chr1	29433658
chr1	29433817
chr1	29433823
chr1	29433874
chr1	29434106
chr1	29434270
chr1	29434393
chr1	29434684
chr1	29434693
chr1	29434738
chr1	29434762
chr1	29435150
chr1	29435192
chr1	29435222
chr1	29435231
chr1	29435591
chr1	29435621
chr1	29435652
chr1	29436158
chr1	29436385
chr1	29450681
chr1	29451714
chr1	29452224
chr1	29452435
chr1	29452927
chr1	29453153
chr1	29453741
chr1	29456176
chr1	29458291
chr1	29458939
chr1	29461984
chr1	29461987
chr1	29462038
chr1	29462044
chr1	29462083
chr1	29462146
chr1	29462326
chr1	29462468
chr1	29463707
chr1	29463729
chr1	29463934
chr1	29463944
chr1	29464054
chr1	29464108
chr1	29464111
chr1	29464144
chr1	29464191
chr1	29464221
chr1	29464237
chr1	29464240
chr1	29464375
chr1	29464387
chr1	29464456
chr1	29464509
chr1	29471892
chr1	29472078
chr1	29472233
chr1	29484673
chr1	29485125
chr1	29486797
chr1	29487222
chr1	29487344
chr1	29487823
chr1	29487825
chr1	29490759
chr1	29490790
chr1	29490952
chr1	29491069
chr1	29492179
chr1	29492475
chr1	29504612
chr1	29524940
chr1	29525336
chr1	29525377
chr1	29525660
chr1	29525717
chr1	29533843
chr1	29534097
chr1	29534145
chr1	29534283
chr1	29534560
chr1	29534586
chr1	29535123
chr1	29535141
chr1	29535278
chr1	29535291
chr1	29537294
chr1	29539328
chr1	29539820
chr1	29541081
chr1	29545573
chr1	29545618
chr1	29546314
chr1	29546706
chr1	29546847
chr1	29549950
chr1	29551447
chr1	29551630
chr1	29551750
chr1	29553593
chr1	29554706
chr1	29555394
chr1	29557256
chr1	29557712
chr1	29564423
chr1	29565388
chr1	29565756
chr1	29567713
chr1	29568631
chr1	29569105
chr1	29570221
chr1	29572319
chr1	29573775
chr1	29574068
chr1	29576886
chr1	29583046
chr1	29583350
chr1	29583419
chr1	29583440
chr1	29583979
chr1	29584204
chr1	29584363
chr1	29584397
chr1	29584477
chr1	29584622
chr1	29584673
chr1	29584717
chr1	29584892
chr1	29585363
chr1	29586132
chr1	29586208
chr1	29586214
chr1	29586259
chr1	29586439
chr1	29586440
chr1	29586888
chr1	29586978
chr1	29586979
chr1	29587090
chr1	29587357
chr1	29587381
chr1	29587845
chr1	29588093
chr1	29588150
chr1	29591651
chr1	29598220
chr1	29598352
chr1	29599596
chr1	29600653
chr1	29601290
chr1	29608000
chr1	29613251
chr1	29618968
chr1	29619207
chr1	29619210
chr1	29619357
chr1	29619410
chr1	29619622
chr1	29619661
chr1	29619976
chr1	29620181
chr1	29621154
chr1	29621432
chr1	29621652
chr1	29621691
chr1	29621807
chr1	29622059
chr1	29622228
chr1	29622231
chr1	29622625
chr1	29622641
chr1	29622684
chr1	29624037
chr1	29625898
chr1	29627875
chr1	29629282
chr1	29629749
chr1	29629912
chr1	29630235
chr1	29630289
chr1	29630528
chr1	29634716
chr1	29635605
chr1	29637083
chr1	29637367
chr1	29637403
chr1	29638128
chr1	29638525
chr1	29638600
chr1	29639196
chr1	29639197
chr1	29639304
chr1	29639310
chr1	29639376
chr1	29639492
chr1	29639525
chr1	29639751
chr1	29639757
chr1	29639921
chr1	29640017
chr1	29640200
chr1	29640551
chr1	29640735
chr1	29641964
chr1	29643236
chr1	29651041
chr1	29651572
chr1	29651582
chr1	29651926
chr1	29652344
chr1	29653054
chr1	29655303
chr1	29655676
chr1	29656730
chr1	29657634
chr1	29657980
chr1	29658009
chr1	29658424
chr1	29658737
chr1	29659157
chr1	29660801
chr1	29661677
chr1	29663004
chr1	29665720
chr1	29665913
chr1	29667000
chr1	29667428
chr1	29667479
chr1	29667582
chr1	29667770
chr1	29668908
chr1	29669339
chr1	29670977
chr1	29671592
chr1	29671981
chr1	29672097
chr1	29674517
chr1	29676816
chr1	29677260
chr1	29677316
chr1	29677400
chr1	29678288
chr1	29678924
chr1	29679349
chr1	29679916
chr1	29697656
chr1	29697929
chr1	29699175
chr1	29699498
chr1	29700662
chr1	29700988
chr1	29701151
chr1	29720823
chr1	29721421
chr1	29721813
chr1	29722187
chr1	29722200
chr1	29724567
chr1	29725164
chr1	29725947
chr1	29727711
chr1	29728221
chr1	29730490
chr1	29731937
chr1	29734148
chr1	29734252
chr1	29738109
chr1	29739964
chr1	29740039
chr1	29740052
chr1	29741661
chr1	29742235
chr1	29742259
chr1	29742262
chr1	29742280
chr1	29742334
chr1	29742418
chr1	29742547
chr1	29742565
chr1	29742718
chr1	29742787
chr1	29743314
chr1	29744731
chr1	29745161
chr1	29745270
chr1	29745439
chr1	29745486
chr1	29745615
chr1	29745700
chr1	29746218
chr1	29746239
chr1	29746375
chr1	29746544
chr1	29746558
chr1	29746935
chr1	29746995
chr1	29747336
chr1	29747657
chr1	29747857
chr1	29748117
chr1	29748521
chr1	29748653
chr1	29748668
chr1	29748769
chr1	29748770
chr1	29748781
chr1	29748820
chr1	29749356
chr1	29749560
chr1	29749737
chr1	29753131
chr1	29753132
chr1	29759635
chr1	29759837
chr1	29760103
chr1	29760301
chr1	29760393
chr1	29765363
chr1	29767949
chr1	29768598
chr1	29772622
chr1	29772761
chr1	29772900
chr1	29773016
chr1	29773034
chr1	29773112
chr1	29773296
chr1	29773308
chr1	29773493
chr1	29773523
chr1	29773729
chr1	29773795
chr1	29773870
chr1	29773885
chr1	29773963
chr1	29773972
chr1	29774000
chr1	29774006
chr1	29775267
chr1	29775331
chr1	29775338
chr1	29776056
chr1	29776096
chr1	29777155
chr1	29777281
chr1	29777284
chr1	29777848
chr1	29777864
chr1	29779769
chr1	29779791
chr1	29779997
chr1	29780166
chr1	29780387
chr1	29780477
chr1	29782325
chr1	29782405
chr1	29782500
chr1	29789319
chr1	29789948
chr1	29790818
chr1	29791721
chr1	29793681
chr1	29793704
chr1	29794090
chr1	29799176
chr1	29800381
chr1	29800682
chr1	29802301
chr1	29802545
chr1	29802694
chr1	29803223
chr1	29803246
chr1	29803757
chr1	29803903
chr1	29803929
chr1	29804654
chr1	29804715
chr1	29804789
chr1	29804795
chr1	29804816
chr1	29804829
chr1	29804862
chr1	29805042
chr1	29805097
chr1	29805130
chr1	29805168
chr1	29805175
chr1	29805241
chr1	29805250
chr1	29805335
chr1	29805382
chr1	29805486
chr1	29805523
chr1	29805547
chr1	29805556
chr1	29805686
chr1	29805717
chr1	29805841
chr1	29806020
chr1	29806023
chr1	29806057
chr1	29806173
chr1	29806217
chr1	29806490
chr1	29806643
chr1	29806656
chr1	29806687
chr1	29806693
chr1	29806960
chr1	29807032
chr1	29807036
chr1	29807038
chr1	29807212
chr1	29807343
chr1	29807554
chr1	29807746
chr1	29807829
chr1	29808168
chr1	29808187
chr1	29808562
chr1	29808795
chr1	29808889
chr1	29809007
chr1	29809108
chr1	29809271
chr1	29809292
chr1	29809330
chr1	29809349
chr1	29809387
chr1	29813624
chr1	29813833
chr1	29813869
chr1	29814005
chr1	29815788
chr1	29816117
chr1	29817441
chr1	29818097
chr1	29818706
chr1	29821839
chr1	29821918
chr1	29822701
chr1	29823874
chr1	29824190
chr1	29824352
chr1	29824521
chr1	29824530
chr1	29826872
chr1	29827115
chr1	29827987
chr1	29828242
chr1	29828609
chr1	29830352
chr1	29831501
chr1	29832818
chr1	29842168
chr1	29842845
chr1	29842923
chr1	29843073
chr1	29843486
chr1	29843549
chr1	29843719
chr1	29844095
chr1	29844206
chr1	29844308
chr1	29849873
chr1	29850530
chr1	29851315
chr1	29851622
chr1	29851919
chr1	29852973
chr1	29854128
chr1	29854512
chr1	29855687
chr1	29855692
chr1	29861728
chr1	29862143
chr1	29862532
chr1	29863125
chr1	29863350
chr1	29863442
chr1	29864230
chr1	29872587
chr1	29882273
chr1	29882369
chr1	29882370
chr1	29884834
chr1	29885852
chr1	29886609
chr1	29887224
chr1	29888053
chr1	29888335
chr1	29890049
chr1	29891531
chr1	29891571
chr1	29892281
chr1	29892925
chr1	29892972
chr1	29893282
chr1	29893519
chr1	29893563
chr1	29893591
chr1	29893751
chr1	29893873
chr1	29894198
chr1	29894309
chr1	29894319
chr1	29894527
chr1	29895107
chr1	29895236
chr1	29895238
chr1	29895368
chr1	29895407
chr1	29895577
chr1	29895592
chr1	29895644
chr1	29895721
chr1	29895766
chr1	29895794
chr1	29895874
chr1	29896024
chr1	29896144
chr1	29896304
chr1	29896326
chr1	29896405
chr1	29900726
chr1	29900845
chr1	29900882
chr1	29901153
chr1	29901187
chr1	29901376
chr1	29902098
chr1	29902137
chr1	29902174
chr1	29903585
chr1	29904781
chr1	29905551
chr1	29905598
chr1	29906024
chr1	29906085
chr1	29906086
chr1	29906125
chr1	29906158
chr1	29906196
chr1	29906225
chr1	29906250
chr1	29906259
chr1	29906298
chr1	29906371
chr1	29906419
chr1	29906427
chr1	29906923
chr1	29907611
chr1	29908770
chr1	29908772
chr1	29908790
chr1	29908940
chr1	29908954
chr1	29909101
chr1	29909202
chr1	29910984
chr1	29911139
chr1	29911148
chr1	29911240
chr1	29911823
chr1	29911838
chr1	29912147
chr1	29912233
chr1	29912573
chr1	29912603
chr1	29912857
chr1	29912938
chr1	29912977
chr1	29913149
chr1	29913206
chr1	29913301
chr1	29913782
chr1	29913795
chr1	29913941
chr1	29913942
chr1	29914330
chr1	29915978
chr1	29916312
chr1	29917883
chr1	29918076
chr1	29918082
chr1	29918103
chr1	29918727
chr1	29919050
chr1	29919112
chr1	29920199
chr1	29920232
chr1	29920298
chr1	29921075
chr1	29921485
chr1	29921545
chr1	29924539
chr1	29925411
chr1	29926013
chr1	29927049
chr1	29927332
chr1	29927780
chr1	29928305
chr1	29928335
chr1	29929603
chr1	29931311
chr1	29931503
chr1	29931521
chr1	29932925
chr1	29933224
chr1	29934121
chr1	29935380
chr1	29935771
chr1	29936189
chr1	29936470
chr1	29936600
chr1	29937313
chr1	29938169
chr1	29941027
chr1	29942893
chr1	29946816
chr1	29947090
chr1	29947787
chr1	29947996
chr1	29949978
chr1	29951698
chr1	29953078
chr1	29953197
chr1	29953641
chr1	29957090
chr1	29962976
chr1	29963123
chr1	29964295
chr1	29964760
chr1	29965553
chr1	29972234
chr1	29972277
chr1	29973184
chr1	29973278
chr1	29973335
chr1	29973594
chr1	29973865
chr1	29974305
chr1	29974398
chr1	29974675
chr1	29975133
chr1	29975146
chr1	29975154
chr1	29975956
chr1	29975963
chr1	29975965
chr1	29976085
chr1	29976093
chr1	29976142
chr1	29976410
chr1	29976483
chr1	29976554
chr1	29976621
chr1	29976622
chr1	29976625
chr1	29976890
chr1	29977049
chr1	29977078
chr1	29977262
chr1	29977442
chr1	29977573
chr1	29978077
chr1	29978497
chr1	29978621
chr1	29978713
chr1	29978828
chr1	29979211
chr1	29990743
chr1	29995262
chr1	29998401
chr1	29998418
chr1	30000514
chr1	30000640
chr1	30000723
chr1	30002341
chr1	30003680
chr1	30003715
chr1	30004863
chr1	30004971
chr1	30005309
chr1	30005998
chr1	30007280
chr1	30010156
chr1	30012889
chr1	30016487
chr1	30016513
chr1	30020590
chr1	30020796
chr1	30021078
chr1	30021079
chr1	30021423
chr1	30021424
chr1	30021468
chr1	30021806
chr1	30022260
chr1	30022444
chr1	30022704
chr1	30023052
chr1	30023445
chr1	30024619
chr1	30026137
chr1	30026292
chr1	30027300
chr1	30027617
chr1	30027718
chr1	30027826
chr1	30028995
chr1	30030834
chr1	30031050
chr1	30032611
chr1	30032680
chr1	30033026
chr1	30039539
chr1	30041337
chr1	30046584
chr1	30046871
chr1	30047586
chr1	30048298
chr1	30051343
chr1	30052581
chr1	30053425
chr1	30058470
chr1	30059503
chr1	30061283
chr1	30061852
chr1	30061856
chr1	30061868
chr1	30061877
chr1	30061922
chr1	30062446
chr1	30062758
chr1	30063728
chr1	30071829
chr1	30072706
chr1	30072883
chr1	30074931
chr1	30075040
chr1	30075050
chr1	30075109
chr1	30075150
chr1	30078977
chr1	30079071
chr1	30079097
chr1	30079235
chr1	30079713
chr1	30080550
chr1	30082597
chr1	30083280
chr1	30083388
chr1	30084485
chr1	30087556
chr1	30088811
chr1	30091986
chr1	30092123
chr1	30093376
chr1	30094960
chr1	30095494
chr1	30096110
chr1	30096233
chr1	30098704
chr1	30099671
chr1	30100009
chr1	30102265
chr1	30103532
chr1	30105021
chr1	30108660
chr1	30115214
chr1	30115563
chr1	30118471
chr1	30118784
chr1	30119695
chr1	30120236
chr1	30123838
chr1	30124986
chr1	30125493
chr1	30126574
chr1	30127400
chr1	30130357
chr1	30130502
chr1	30136441
chr1	30136755
chr1	30139269
chr1	30139326
chr1	30139665
chr1	30139757
chr1	30140048
chr1	30148728
chr1	30148794
chr1	30149403
chr1	30149836
chr1	30149948
chr1	30150012
chr1	30150014
chr1	30150279
chr1	30150282
chr1	30151986
chr1	30152108
chr1	30153594
chr1	30153949
chr1	30154144
chr1	30154145
chr1	30154709
chr1	30155360
chr1	30155519
chr1	30156853
chr1	30157364
chr1	30159286
chr1	30160980
chr1	30162961
chr1	30163366
chr1	30163901
chr1	30164244
chr1	30170035
chr1	30170351
chr1	30170374
chr1	30170842
chr1	30170843
chr1	30170940
chr1	30175419
chr1	30176186
chr1	30176506
chr1	30177397
chr1	30178233
chr1	30179711
chr1	30179719
chr1	30182060
chr1	30182416
chr1	30183208
chr1	30183360
chr1	30188743
chr1	30188845
chr1	30192497
chr1	30193141
chr1	30194318
chr1	30194392
chr1	30196438
chr1	30197206
chr1	30197257
chr1	30197578
chr1	30197827
chr1	30205450
chr1	30205652
chr1	30205664
chr1	30205697
chr1	30205730
chr1	30205817
chr1	30205873
chr1	30206066
chr1	30206111
chr1	30206153
chr1	30206162
chr1	30206438
chr1	30206495
chr1	30206871
chr1	30207229
chr1	30207346
chr1	30207388
chr1	30207628
chr1	30208037
chr1	30208064
chr1	30208610
chr1	30208646
chr1	30208844
chr1	30210720
chr1	30210740
chr1	30214776
chr1	30215101
chr1	30215469
chr1	30216360
chr1	30219609
chr1	30219901
chr1	30220072
chr1	30221699
chr1	30225324
chr1	30225329
chr1	30225728
chr1	30225763
chr1	30225793
chr1	30226110
chr1	30227036
chr1	30227180
chr1	30227568
chr1	30227972
chr1	30229408
chr1	30230621
chr1	30236098
chr1	30236165
chr1	30237661
chr1	30237669
chr1	30237670
chr1	30238312
chr1	30242553
chr1	30242651
chr1	30242682
chr1	30242922
chr1	30242937
chr1	30243551
chr1	30243847
chr1	30244180
chr1	30246811
chr1	30247151
chr1	30247511
chr1	30249038
chr1	30249175
chr1	30257178
chr1	30258158
chr1	30258229
chr1	30258837
chr1	30258851
chr1	30259524
chr1	30261057
chr1	30261214
chr1	30262102
chr1	30264322
chr1	30265400
chr1	30266478
chr1	30270745
chr1	30270974
chr1	30272209
chr1	30276906
chr1	30278895
chr1	30279481
chr1	30285100
chr1	30285422
chr1	30286068
chr1	30286387
chr1	30286390
chr1	30286406
chr1	30286409
chr1	30286686
chr1	30287124
chr1	30287140
chr1	30287251
chr1	30287511
chr1	30287949
chr1	30288250
chr1	30288590
chr1	30289052
chr1	30289543
chr1	30289677
chr1	30290199
chr1	30290261
chr1	30291765
chr1	30292051
chr1	30292319
chr1	30292376
chr1	30298501
chr1	30298627
chr1	30298635
chr1	30298637
chr1	30298672
chr1	30298699
chr1	30298701
chr1	30298735
chr1	30298736
chr1	30298801
chr1	30298819
chr1	30298828
chr1	30299346
chr1	30300289
chr1	30300442
chr1	30300501
chr1	30300852
chr1	30301838
chr1	30301856
chr1	30301978
chr1	30303393
chr1	30303865
chr1	30304116
chr1	30305335
chr1	30305895
chr1	30307286
chr1	30309814
chr1	30309974
chr1	30310328
chr1	30310586
chr1	30311642
chr1	30312662
chr1	30312705
chr1	30312930
chr1	30313311
chr1	30313572
chr1	30314253
chr1	30314256
chr1	30314775
chr1	30315049
chr1	30321125
chr1	30321628
chr1	30323099
chr1	30324640
chr1	30326483
chr1	30327672
chr1	30328504
chr1	30328556
chr1	30332332
chr1	30334006
chr1	30334737
chr1	30337457
chr1	30347657
chr1	30347692
chr1	30349862
chr1	30349993
chr1	30355645
chr1	30356513
chr1	30356764
chr1	30357523
chr1	30357648
chr1	30357848
chr1	30358132
chr1	30358196
chr1	30358234
chr1	30358576
chr1	30359825
chr1	30360362
chr1	30361205
chr1	30362412
chr1	30362415
chr1	30363209
chr1	30364180
chr1	30364698
chr1	30365437
chr1	30365461
chr1	30366404
chr1	30367336
chr1	30367451
chr1	30368830
chr1	30368958
chr1	30370650
chr1	30370992
chr1	30371373
chr1	30371778
chr1	30372406
chr1	30372455
chr1	30372486
chr1	30372487
chr1	30372535
chr1	30372930
chr1	30374389
chr1	30374408
chr1	30384078
chr1	30384079
chr1	30384507
chr1	30385413
chr1	30385511
chr1	30387030
chr1	30389092
chr1	30389218
chr1	30392236
chr1	30392372
chr1	30392777
chr1	30392792
chr1	30393001
chr1	30393035
chr1	30393357
chr1	30393389
chr1	30394163
chr1	30394248
chr1	30394252
chr1	30394722
chr1	30394747
chr1	30395114
chr1	30395208
chr1	30395231
chr1	30395644
chr1	30396453
chr1	30396538
chr1	30396628
chr1	30396669
chr1	30396859
chr1	30397395
chr1	30397988
chr1	30398278
chr1	30398320
chr1	30398541
chr1	30398772
chr1	30399313
chr1	30399369
chr1	30399484
chr1	30399613
chr1	30400239
chr1	30401365
chr1	30401368
chr1	30401953
chr1	30401975
chr1	30402143
chr1	30402250
chr1	30402317
chr1	30402459
chr1	30402591
chr1	30402603
chr1	30402666
chr1	30402675
chr1	30402696
chr1	30403047
chr1	30403455
chr1	30403579
chr1	30403752
chr1	30403767
chr1	30404094
chr1	30404138
chr1	30404233
chr1	30404487
chr1	30404599
chr1	30404612
chr1	30405534
chr1	30405638
chr1	30406135
chr1	30407085
chr1	30407557
chr1	30408327
chr1	30408649
chr1	30408738
chr1	30408914
chr1	30408970
chr1	30409381
chr1	30409510
chr1	30409553
chr1	30410868
chr1	30411000
chr1	30411563
chr1	30411650
chr1	30411919
chr1	30411997
chr1	30412078
chr1	30412184
chr1	30412816
chr1	30412817
chr1	30412968
chr1	30413034
chr1	30413136
chr1	30413418
chr1	30413706
chr1	30413724
chr1	30414080
chr1	30414143
chr1	30414149
chr1	30414266
chr1	30416480
chr1	30416501
chr1	30416760
chr1	30416782
chr1	30416820
chr1	30416821
chr1	30416991
chr1	30417052
chr1	30417129
chr1	30417132
chr1	30417162
chr1	30417247
chr1	30417267
chr1	30417300
chr2	56489
chr2	69008
chr2	74088
chr2	74198
chr2	74312
chr2	75815
chr2	76134
chr2	76310
chr2	76393
chr2	76795
chr2	76968
chr2	77634
chr2	77648
chr2	77681
chr2	77750
chr2	77783
chr2	78565
chr2	79333
chr2	79385
chr2	80134
chr2	80137
chr2	80620
chr2	80817
chr2	80818
chr2	81111
chr2	81613
chr2	81691
chr2	81692
chr2	81745
chr2	81750
chr2	81766
chr2	81886
chr2	82340
chr2	82361
chr2	82370
chr2	82381
chr2	82384
chr2	82426
chr2	82429
chr2	82580
chr2	82934
chr2	82967
chr2	82984
chr2	83046
chr2	83047
chr2	83234
chr2	83533
chr2	83554
chr2	83764
chr2	83795
chr2	84097
chr2	85844
chr2	86107
chr2	86542
chr2	86543
chr2	88225
chr2	88568
chr2	88867
chr2	91204
chr2	92517
chr2	92757
chr2	93292
chr2	93419
chr2	93778
chr2	94452
chr2	94835
chr2	95459
chr2	100543
chr2	100674
chr2	104218
chr2	105954
chr2	106907
chr2	107506
chr2	108184
chr2	108185
chr2	108186
chr2	108598
chr2	113988
chr2	115247
chr2	115251
chr2	117300
chr2	118415
chr2	119520
chr2	120487
chr2	120949
chr2	121330
chr2	121346
chr2	132807
chr2	132867
chr2	132898
chr2	132936
chr2	133412
chr2	133994
chr2	134011
chr2	134151
chr2	134293
chr2	134344
chr2	135799
chr2	136774
chr2	136821
chr2	136940
chr2	137116
chr2	138961
chr2	140817
chr2	141687
chr2	141843
chr2	142392
chr2	142740
chr2	144164
chr2	144174
chr2	144378
chr2	146642
chr2	147719
chr2	149270
chr2	149399
chr2	149459
chr2	149531
chr2	149609
chr2	149622
chr2	149951
chr2	149960
chr2	150178
chr2	150495
chr2	150628
chr2	151190
chr2	154224
chr2	154228
chr2	154579
chr2	154750
chr2	154776
chr2	154852
chr2	154921
chr2	154939
chr2	155225
chr2	155317
chr2	155328
chr2	155347
chr2	155350
chr2	155614
chr2	156436
chr2	156463
chr2	156487
chr2	156497
chr2	156582
chr2	156585
chr2	156815
chr2	156861
chr2	156864
chr2	157393
chr2	157502
chr2	157830
chr2	158103
chr2	158803
chr2	158947
chr2	158980
chr2	159072
chr2	159079
chr2	159637
chr2	159819
chr2	159845
chr2	160449
chr2	160702
chr2	163994
chr2	163998
chr2	164004
chr2	164171
chr2	164537
chr2	164992
chr2	164997
chr2	165000
chr2	165968
chr2	166248
chr2	166623
chr2	166732
chr2	166768
chr2	166770
chr2	166872
chr2	166873
chr2	167061
chr2	167062
chr2	168536
chr2	168649
chr2	168737
chr2	168898
chr2	168965
chr2	169022
chr2	169028
chr2	169514
chr2	172305
chr2	172379
chr2	172470
chr2	173304
chr2	173430
chr2	174365
chr2	174877
chr2	174886
chr2	175127
chr2	175191
chr2	175195
chr2	175290
chr2	175491
chr2	175503
chr2	175530
chr2	175701
chr2	175704
chr2	175875
chr2	176430
chr2	180438
chr2	180481
chr2	180505
chr2	180983
chr2	181767
chr2	181774
chr2	182089
chr2	182090
chr2	182842
chr2	183143
chr2	183986
chr2	184042
chr2	184151
chr2	184239
chr2	184274
chr2	184332
chr2	184393
chr2	184541
chr2	184645
chr2	184652
chr2	192483
chr2	192511
chr2	193250
chr2	193280
chr2	193348
chr2	193365
chr2	193895
chr2	195660
chr2	195661
chr2	198919
chr2	199673
chr2	199818
chr2	200270
chr2	200587
chr2	200852
chr2	201418
chr2	202240
chr2	204580
chr2	204599
chr2	206118
chr2	206423
chr2	206969
chr2	207345
chr2	207919
chr2	209430
chr2	210358
chr2	211917
chr2	212199
chr2	212212
chr2	212215
chr2	212248
chr2	212269
chr2	212274
chr2	212443
chr2	212475
chr2	212717
chr2	212718
chr2	213267
chr2	213311
chr2	213729
chr2	213990
chr2	214196
chr2	214215
chr2	214216
chr2	214223
chr2	214361
chr2	215290
chr2	220390
chr2	221282
chr2	221409
chr2	222306
chr2	223049
chr2	223229
chr2	223788
chr2	229115
chr2	229260
chr2	229338
chr2	229477
chr2	229627
chr2	230504
chr2	231799
chr2	231963
chr2	232054
chr2	232072
chr2	232079
chr2	232085
chr2	232385
chr2	232423
chr2	242178
chr2	242802
chr2	255586
chr2	256094
chr2	256331
chr2	256355
chr2	256358
chr2	256415
chr2	256424
chr2	256472
chr2	256640
chr2	256679
chr2	256724
chr2	256737
chr2	256757
chr2	256811
chr2	256826
chr2	257213
chr2	257249
chr2	257273
chr2	257285
chr2	257320
chr2	257327
chr2	257468
chr2	257527
chr2	270772
chr2	270774
chr2	270904
chr2	270957
chr2	271182
chr2	271762
chr2	272393
chr2	272394
chr2	272400
chr2	275767
chr2	278313
chr2	278372
chr2	278380
chr2	278417
chr2	278426
chr2	278430
chr2	278434
chr2	278489
chr2	278750
chr2	278879
chr2	279148
chr2	281002
chr2	281976
chr2	283848
chr2	283866
chr2	285852
chr2	285906
chr2	285919
chr2	285920
chr2	286129
chr2	286178
chr2	286197
chr2	286198
chr2	286200
chr2	286365
chr2	286406
chr2	286433
chr2	287571
chr2	287952
chr2	290959
chr2	295163
chr2	295174
chr2	296711
chr2	297021
chr2	297361
chr2	297573
chr2	297984
chr2	306404
chr2	309201
chr2	309447
chr2	312345
chr2	312394
chr2	313467
chr2	313572
chr2	313723
chr2	315964
chr2	315973
chr2	316003
chr2	316033
chr2	316080
chr2	316081
chr2	316129
chr2	316147
chr2	316223
chr2	316232
chr2	316274
chr2	317067
chr2	317142
chr2	317144
chr2	317151
chr2	317172
chr2	317214
chr2	317217
chr2	317286
chr2	317590
chr2	318012
chr2	318269
chr2	318884
chr2	319148
chr2	320830
chr2	321672
chr2	322193
chr2	322691
chr2	323221
chr2	323347
chr2	323449
chr2	323456
chr2	324509
chr2	324578
chr2	324931
chr2	324932
chr2	325385
chr2	325450
chr2	325483
chr2	325522
chr2	325531
chr2	325542
chr2	325733
chr2	325766
chr2	326070
chr2	326205
chr2	326795
chr2	326985
chr2	327170
chr2	327233
chr2	327279
chr2	327333
chr2	327336
chr2	327471
chr2	328998
chr2	331098
chr2	331249
chr2	331651
chr2	331797
chr2	331845
chr2	332459
chr2	332525
chr2	332570
chr2	333044
chr2	357662
chr2	357790
chr2	357826
chr2	357844
chr2	357865
chr2	357892
chr2	357934
chr2	357940
chr2	357998
chr2	358003
chr2	358012
chr2	358033
chr2	358057
chr2	358368
chr2	358432
chr2	358480
chr2	359316
chr2	359330
chr2	359467
chr2	359536
chr2	359545
chr2	359581
chr2	359662
chr2	359756
chr2	359809
chr2	359810
chr2	359848
chr2	359852
chr2	359853
chr2	360100
chr2	360151
chr2	360394
chr2	360673
chr2	363183
chr2	363523
chr2	365178
chr2	365473
chr2	365578
chr2	385357
chr2	385684
chr2	385687
chr2	388162
chr2	388471
chr2	388495
chr2	388582
chr2	388621
chr2	388711
chr2	388759
chr2	388762
chr2	388771
chr2	388789
chr2	388846
chr2	389240
chr2	389293
chr2	389349
chr2	389440
chr2	389515
chr2	389704
chr2	389705
chr2	389716
chr2	389811
chr2	389815
chr2	389891
chr2	389918
chr2	390035
chr2	390209
chr2	390266
chr2	390304
chr2	417235
chr2	417629
chr2	418390
chr2	419004
chr2	419527
chr2	420412
chr2	427934
chr2	428069
chr2	428117
chr2	428302
chr2	428322
chr2	428409
chr2	428683
chr2	428733
chr2	432571
chr2	433119
chr2	433207
chr2	433228
chr2	433306
chr2	433330
chr2	433357
chr2	433414
chr2	434066
chr2	434069
chr2	434181
chr2	434182
chr2	434342
chr2	434355
chr2	434392
chr2	434434
chr2	434454
chr2	434911
chr2	434958
chr2	434969
chr2	440523
chr2	452189
chr2	452193
chr2	452248
chr2	452544
chr2	453085
chr2	454718
chr2	454721
chr2	454758
chr2	454760
chr2	459366
chr2	460462
chr2	461794
chr2	462457
chr2	463050
chr2	463179
chr2	488342
chr2	489485
chr2	491374
chr2	491788
chr2	495741
chr2	495774
chr2	496309
chr2	496339
chr2	496865
chr2	505836
chr2	507676
chr2	508539
chr2	519005
chr2	519106
chr2	519594
chr2	519812
chr2	519814
chr2	520103
chr2	520233
chr2	520323
chr2	520335
chr2	520596
chr2	520743
chr2	525209
chr2	530593
chr2	531259
chr2	531521
chr2	531660
chr2	532058
chr2	532510
chr2	536992
chr2	537025
chr2	537360
chr2	538263
chr2	538264
chr2	539722
chr2	540281
chr2	540517
chr2	540526
chr2	547246
chr2	547332
chr2	547561
chr2	547657
chr2	548147
chr2	548269
chr2	549809
chr2	549927
chr2	550103
chr2	551591
chr2	551840
chr2	553536
chr2	554279
chr2	555056
chr2	555095
chr2	556798
chr2	557457
chr2	558327
chr2	558802
chr2	563181
chr2	563188
chr2	584126
chr2	584127
chr2	584278
chr2	584479
chr2	585667
chr2	585982
chr2	586457
chr2	586483
chr2	586925
chr2	587107
chr2	587226
chr2	587305
chr2	590573
chr2	590693
chr2	590717
chr2	590759
chr2	591151
chr2	591277
chr2	591365
chr2	591446
chr2	591449
chr2	591488
chr2	591496
chr2	591503
chr2	618345
chr2	619703
chr2	619711
chr2	619921
chr2	620111
chr2	620446
chr2	620472
chr2	620512
chr2	621284
chr2	621291
chr2	621327
chr2	621332
chr2	621880
chr2	621943
chr2	622439
chr2	622742
chr2	622785
chr2	623192
chr2	629976
chr2	630014
chr2	630131
chr2	630889
chr2	630925
chr2	631446
chr2	631526
chr2	631575
chr2	631584
chr2	631624
chr2	631634
chr2	631641
chr2	631650
chr2	631728
chr2	631734
chr2	631821
chr2	632258
chr2	632363
chr2	632369
chr2	632414
chr2	632708
chr2	632910
chr2	632955
chr2	633142
chr2	633563
chr2	635605
chr2	654015
chr2	654358
chr2	654791
chr2	660952
chr2	661989
chr2	662022
chr2	662156
chr2	662175
chr2	662408
chr2	662490
chr2	662776
chr2	662778
chr2	663792
chr2	663795
chr2	663871
chr2	663877
chr2	664025
chr2	664035
chr2	664159
chr2	664469
chr2	664624
chr2	664665
chr2	664731
chr2	671361
chr2	671376
chr2	671820
chr2	672235
chr2	672323
chr2	672335
chr2	672483
chr2	673037
chr2	673440
chr2	673575
chr2	673691
chr2	674094
chr2	674126
chr2	674690
chr2	690344
chr2	690374
chr2	690869
chr2	692545
chr2	692636
chr2	694129
chr2	694482
chr2	694997
chr2	695409
chr2	695599
chr2	696230
chr2	696703
chr2	696763
chr2	696836
chr2	697198
chr2	697270
chr2	697288
chr2	697293
chr2	698385
chr2	698478
chr2	698487
chr2	698606
chr2	698720
chr2	698879
chr2	698991
chr2	699108
chr2	699358
chr2	699688
chr2	699701
chr2	699707
chr2	699961
chr2	700018
chr2	700790
chr2	700795
chr2	700831
chr2	700862
chr2	705051
chr2	705204
chr2	705213
chr2	705336
chr2	705347
chr2	705471
chr2	705508
chr2	706179
chr2	706219
chr2	706239
chr2	706371
chr2	735664
chr2	735793
chr2	735808
chr2	736020
chr2	755848
chr2	758809
chr2	758900
chr2	759176
chr2	759194
chr2	759272
chr2	759366
chr2	759373
chr2	759386
chr2	759390
chr2	759652
chr2	759723
chr2	759735
chr2	759762
chr2	759808
chr2	759811
chr2	759829
chr2	759845
chr2	759851
chr2	760075
chr2	760214
chr2	760232
chr2	760240
chr2	760420
chr2	760435
chr2	760510
chr2	760547
chr2	760648
chr2	760711
chr2	763739
chr2	764117
chr2	764276
chr2	764369
chr2	764970
chr2	764998
chr2	765183
chr2	765204
chr2	765407
chr2	766036
chr2	766077
chr2	766474
chr2	766506
chr2	766548
chr2	766572
chr2	766691
chr2	766841
chr2	766885
chr2	767259
chr2	767338
chr2	767403
chr2	769472
chr2	769587
chr2	769743
chr2	769749
chr2	770303
chr2	770354
chr2	770857
chr2	771361
chr2	771369
chr2	771565
chr2	771623
chr2	772516
chr2	772623
chr2	773951
chr2	775143
chr2	775223
chr2	775239
chr2	775263
chr2	775301
chr2	775343
chr2	776741
chr2	776883
chr2	782883
chr2	783411
chr2	783756
chr2	783792
chr2	783797
chr2	783838
chr2	783972
chr2	783980
chr2	784266
chr2	784338
chr2	784422
chr2	784427
chr2	784455
chr2	784467
chr2	784473
chr2	784503
chr2	784562
chr2	788098
chr2	789573
chr2	790102
chr2	796842
chr2	796871
chr2	796937
chr2	796951
chr2	797186
chr2	797222
chr2	797434
chr2	797676
chr2	797775
chr2	798010
chr2	798233
chr2	798428
chr2	798431
chr2	798488
chr2	798503
chr2	799337
chr2	801744
chr2	802984
chr2	803073
chr2	818260
chr2	822152
chr2	822173
chr2	822210
chr2	822213
chr2	822365
chr2	822380
chr2	822381
chr2	822511
chr2	822514
chr2	822543
chr2	822742
chr2	822820
chr2	822857
chr2	822992
chr2	823083
chr2	823240
chr2	823449
chr2	823488
chr2	823574
chr2	823583
chr2	823644
chr2	823712
chr2	823733
chr2	823787
chr2	823956
chr2	823972
chr2	824105
chr2	824124
chr2	824176
chr2	824192
chr2	824264
chr2	824288
chr2	824293
chr2	824334
chr2	824338
chr2	824386
chr2	824400
chr2	824481
chr2	824524
chr2	824667
chr2	824718
chr2	824745
chr2	824785
chr2	824788
chr2	824846
chr2	824862
chr2	824987
chr2	825100
chr2	825138
chr2	825222
chr2	825324
chr2	825418
chr2	825466
chr2	825495
chr2	825520
chr2	825561
chr2	825587
chr2	825628
chr2	825661
chr2	825682
chr2	825690
chr2	825770
chr2	825995
chr2	826024
chr2	826136
chr2	826261
chr2	826303
chr2	826517
chr2	827159
chr2	827205
chr2	827207
chr2	827326
chr2	827459
chr2	827471
chr2	827619
chr2	827683
chr2	827684
chr2	827704
chr2	828388
chr2	828430
chr2	828439
chr2	828481
chr2	828687
chr2	828693
chr2	828792
chr2	828798
chr2	829254
chr2	829639
chr2	829994
chr2	832081
chr2	832087
chr2	839806
chr2	839930
chr2	841337
chr2	841349
chr2	841350
chr2	841410
chr2	841971
chr2	847553
chr2	847682
chr2	848215
chr2	849141
chr2	851169
chr2	851611
chr2	859495
chr2	859558
chr2	859863
chr2	859870
chr2	859897
chr2	859903
chr2	859927
chr2	859997
chr2	863103
chr2	865755
chr2	868018
chr2	868048
chr2	868178
chr2	869011
chr2	869227
chr2	869713
chr2	869793
chr2	881005
chr2	881230
chr2	899854
chr2	900066
chr2	900847
chr2	900871
chr2	902996
chr2	902997
chr2	903133
chr2	903176
chr2	903492
chr2	906034
chr2	907825
chr2	908793
chr2	917172
chr2	917397
chr2	917911
chr2	918115
chr2	918405
chr2	938786
chr2	940212
chr2	942055
chr2	942199
chr2	942245
chr2	942269
chr2	942286
chr2	942494
chr2	942496
chr2	942593
chr2	943310
chr2	943311
chr2	943376
chr2	943620
chr2	943922
chr2	944782
chr2	944801
chr2	944920
chr2	945125
chr2	945938
chr2	946329
chr2	946796
chr2	946863
chr2	947991
chr2	948698
chr2	948937
chr2	949211
chr2	949598
chr2	949734
chr2	950183
chr2	950979
chr2	950995
chr2	952354
chr2	952477
chr2	952611
chr2	952900
chr2	953135
chr2	953577
chr2	953854
chr2	953863
chr2	954502
chr2	954552
chr2	954719
chr2	955212
chr2	955321
chr2	955742
chr2	956452
chr2	956996
chr2	957008
chr2	958063
chr2	958397
chr2	958470
chr2	958473
chr2	970388
chr2	970413
chr2	970449
chr2	970482
chr2	970554
chr2	970569
chr2	970822
chr2	972306
chr2	972321
chr2	973807
chr2	975186
chr2	975221
chr2	975733
chr2	975938
chr2	979064
chr2	988157
chr2	988178
chr2	988701
chr2	988712
chr2	988933
chr2	988972
chr2	989171
chr2	989385
chr2	989514
chr2	989807
chr2	989819
chr2	990153
chr2	993852
chr2	994062
chr2	995017
chr2	995618
chr2	996131
chr2	996304
chr2	996506
chr2	996844
chr2	996886
chr2	997446
chr2	997509
chr2	997567
chr2	997692
chr2	997791
chr2	997857
chr2	1000315
chr2	1000344
chr2	1000505
chr2	1014152
chr2	1014191
chr2	1014229
chr2	1014461
chr2	1014501
chr2	1014643
chr2	1014772
chr2	1014841
chr2	1014937
chr2	1014994
chr2	1015136
chr2	1015142
chr2	1015339
chr2	1015354
chr2	1015374
chr2	1015401
chr2	1015464
chr2	1015476
chr2	1015477
chr2	1015491
chr2	1015498
chr2	1015545
chr2	1015614
chr2	1015659
chr2	1015887
chr2	1015947
chr2	1016421
chr2	1017080
chr2	1019599
chr2	1019747
chr2	1019841
chr2	1019844
chr2	1019910
chr2	1019922
chr2	1019937
chr2	1019940
chr2	1019943
chr2	1020233
chr2	1020255
chr2	1029042
chr2	1029692
chr2	1029777
chr2	1029839
chr2	1030058
chr2	1030425
chr2	1030426
chr2	1030499
chr2	1030623
chr2	1030731
chr2	1031226
chr2	1031285
chr2	1032358
chr2	1033897
chr2	1034853
chr2	1035205
chr2	1035663
chr2	1035729
chr2	1035818
chr2	1035827
chr2	1036342
chr2	1036555
chr2	1036996
chr2	1039254
chr2	1039408
chr2	1039472
chr2	1039484
chr2	1039551
chr2	1039763
chr2	1039817
chr2	1042223
chr2	1042235
chr2	1042340
chr2	1043273
chr2	1045728
chr2	1046249
chr2	1046572
chr2	1046817
chr2	1046837
chr2	1051384
chr2	1053290
chr2	1053544
chr2	1067239
chr2	1067251
chr2	1067653
chr2	1067668
chr2	1067683
chr2	1067725
chr2	1067734
chr2	1067752
chr2	1067764
chr2	1068341
chr2	1068527
chr2	1068546
chr2	1068963
chr2	1069864
chr2	1069870
chr2	1070008
chr2	1070019
chr2	1070093
chr2	1070474
chr2	1070549
chr2	1070611
chr2	1070635
chr2	1070669
chr2	1070699
chr2	1070705
chr2	1070712
chr2	1070876
chr2	1070879
chr2	1070893
chr2	1071052
chr2	1095085
chr2	1096093
chr2	1100630
chr2	1100645
chr2	1100861
chr2	1102254
chr2	1104474
chr2	1106110
chr2	1106127
chr2	1115132
chr2	1115409
chr2	1121043
chr2	1121299
chr2	1121901
chr2	1122320
chr2	1137923
chr2	1138178
chr2	1138189
chr2	1138214
chr2	1138233
chr2	1138309
chr2	1138542
chr2	1138731
chr2	1138854
chr2	1138878
chr2	1138985
chr2	1139010
chr2	1139170
chr2	1139263
chr2	1139296
chr2	1139308
chr2	1139352
chr2	1139693
chr2	1139836
chr2	1139887
chr2	1149631
chr2	1149904
chr2	1149916
chr2	1152530
chr2	1152760
chr2	1152772
chr2	1152786
chr2	1152952
chr2	1153015
chr2	1153045
chr2	1153084
chr2	1153220
chr2	1153277
chr2	1153319
chr2	1153331
chr2	1153397
chr2	1153548
chr2	1153753
chr2	1153770
chr2	1154050
chr2	1154063
chr2	1154064
chr2	1154219
chr2	1157169
chr2	1161686
chr2	1163255
chr2	1163353
chr2	1163354
chr2	1164130
chr2	1165782
chr2	1165992
chr2	1166219
chr2	1166532
chr2	1180059
chr2	1180088
chr2	1180481
chr2	1180636
chr2	1181184
chr2	1181199
chr2	1181214
chr2	1181241
chr2	1181273
chr2	1181319
chr2	1182234
chr2	1182252
chr2	1182372
chr2	1182832
chr2	1182949
chr2	1183245
chr2	1183308
chr2	1183475
chr2	1183476
chr2	1186192
chr2	1187377
chr2	1188352
chr2	1188357
chr2	1188495
chr2	1188532
chr2	1251718
chr2	1251994
chr2	1252152
chr2	1252414
chr2	1252573
chr2	1252650
chr2	1252707
chr2	1252711
chr2	1252907
chr2	1253673
chr2	1254181
chr2	1281910
chr2	1283039
chr2	1283211
chr2	1334309
chr2	1335169
chr2	1335240
chr2	1350100
chr2	1365516
chr2	1366437
chr2	1366463
chr2	1366764
chr2	1377018
chr2	1377067
chr2	1377107
chr2	1377600
chr2	1377819
chr2	1378197
chr2	1382839
chr2	1383095
chr2	1383298
chr2	1417510
chr2	1421576
chr2	1421774
chr2	1421803
chr2	1447463
chr2	1447501
chr2	1447520
chr2	1447521
chr2	1447552
chr2	1447562
chr2	1447731
chr2	1447778
chr2	1447850
chr2	1447921
chr2	1447959
chr2	1448017
chr2	1448062
chr2	1448110
chr2	1448185
chr2	1448267
chr2	1448521
chr2	1448754
chr2	1449580
chr2	1450223
chr2	1450779
chr2	1451119
chr2	1452404
chr2	1452724
chr2	1453216
chr2	1453494
chr2	1453552
chr2	1461975
chr2	1462208
chr2	1462245
chr2	1475036
chr2	1475037
chr2	1477792
chr2	1478549
chr2	1478819
chr2	1479167
chr2	1480415
chr2	1481653
chr2	1502126
chr2	1513643
chr2	1513718
chr2	1513754
chr2	1514479
chr2	1514638
chr2	1514917
chr2	1515341
chr2	1515902
chr2	1519849
chr2	1520201
chr2	1520440
chr2	1527093
chr2	1531399
chr2	1532785
chr2	1533458
chr2	1533656
chr2	1533735
chr2	1534249
chr2	1534424
chr2	1534757
chr2	1535078
chr2	1538664
chr2	1539112
chr2	1539418
chr2	1539653
chr2	1540525
chr2	1540851
chr2	1560250
chr2	1560566
chr2	1560569
chr2	1575496
chr2	1582122
chr2	1582594
chr2	1582635
chr2	1583312
chr2	1590018
chr2	1591499
chr2	1591611
chr2	1610551
chr2	1611067
chr2	1611625
chr2	1611777
chr2	1612007
chr2	1612375
chr2	1619019
chr2	1619523
chr2	1619562
chr2	1619852
chr2	1619934
chr2	1622058
chr2	1622643
chr2	1623959
chr2	1625900
chr2	1644913
chr2	1645150
chr2	1645512
chr2	1645621
chr2	1645786
chr2	1646045
chr2	1646090
chr2	1646874
chr2	1646877
chr2	1646950
chr2	1646953
chr2	1646956
chr2	1646960
chr2	1646997
chr2	1647426
chr2	1647432
chr2	1648266
chr2	1648350
chr2	1648493
chr2	1648877
chr2	1648886
chr2	1657193
chr2	1657205
chr2	1657211
chr2	1657490
chr2	1657584
chr2	1658031
chr2	1658133
chr2	1658205
chr2	1658313
chr2	1658367
chr2	1658556
chr2	1658648
chr2	1663220
chr2	1680074
chr2	1680294
chr2	1694249
chr2	1694443
chr2	1698513
chr2	1702298
chr2	1702457
chr2	1702692
chr2	1704968
chr2	1705820
chr2	1706178
chr2	1708682
chr2	1708866
chr2	1710659
chr2	1710692
chr2	1710805
chr2	1711002
chr2	1711025
chr2	1711065
chr2	1711872
chr2	1714040
chr2	1714643
chr2	1714666
chr2	1714689
chr2	1714690
chr2	1714971
chr2	1715019
chr2	1718496
chr2	1720003
chr2	1721770
chr2	1722744
chr2	1738944
chr2	1740261
chr2	1783897
chr2	1785518
chr2	1786101
chr2	1838678
chr2	1838692
chr2	1842186
chr2	1842474
chr2	1842616
chr2	1842657
chr2	1842913
chr2	1842953
chr2	1843015
chr2	1843056
chr2	1843491
chr2	1843637
chr2	1843668
chr2	1843690
chr2	1843694
chr2	1843909
chr2	1844032
chr2	1844090
chr2	1844170
chr2	1844270
chr2	1844574
chr2	1844584
chr2	1844736
chr2	1844808
chr2	1844944
chr2	1844991
chr2	1845005
chr2	1845325
chr2	1845354
chr2	1845450
chr2	1845462
chr2	1845864
chr2	1846084
[truncated: 1,057,455 more chars]
