# Supplementary material for: Dormancy-specific imprinting underlies maternal inheritance of seed dormancy in Arabidopsis thaliana
Source: eLife journal article supplement (doi:10.7554/elife.19573), 2016-12-22
Supplement: supp [file elife_poa_e19573_Figure_3_figure_supplement_1.pdf › elife_poa_e19573_Figure_3_figure_supplement_1.pdf]

No  
aft.-rip.

Dry after-ripening time

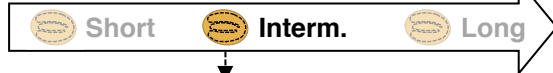

48h 72h 120h

log2  
Relative transcript levels CP1

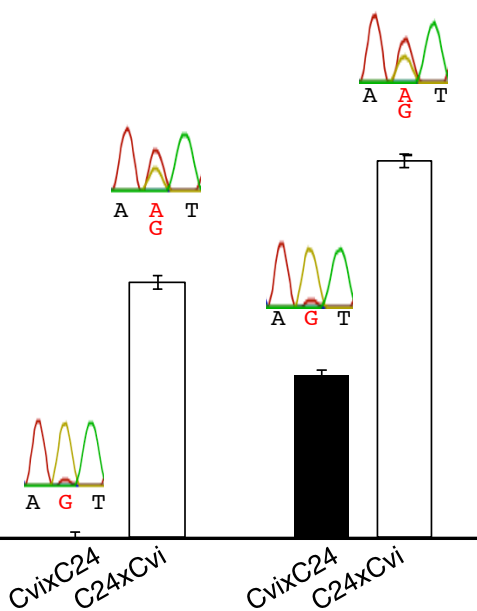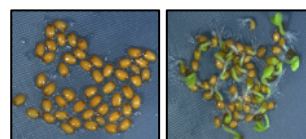

CvixC24

C24xCvi

Fig.3-figure supplement 1
