# Supplementary figures and images for: Dormancy-specific imprinting underlies maternal inheritance of seed dormancy in Arabidopsis thaliana
Source: eLife journal article supplement (doi:10.7554/elife.19573), 2016-12-22

No  
aft.-rip.

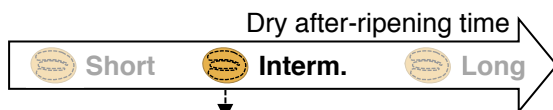

48h 72h 120h

log2

Relative transcript levels CP1

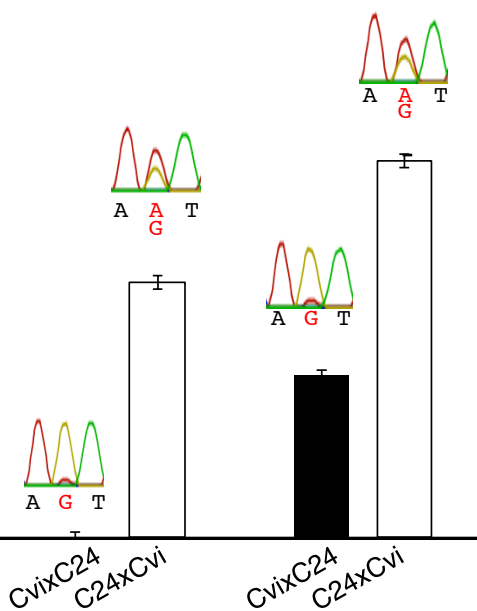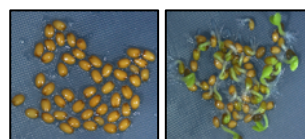

CvixC24

C24xCvi

Fig.3-figure supplement 1

Supplement: supp [file elife-19573-supp-v1.zip › elife_poa_e19573_Figure_3_figure_supplement_1.pdf]

**A**

♀ *pFWA::dFWA-GFP*

x

♂ *pDD65::mtKaede*

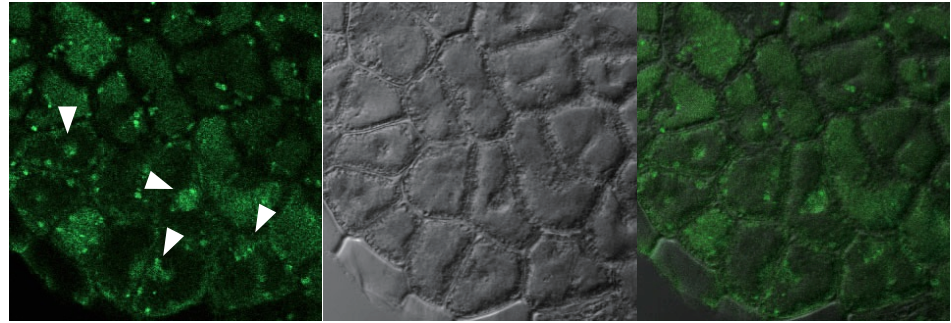

♀ *pDD65::mtKaede*

x

♂ *pFWA::dFWA-GFP*

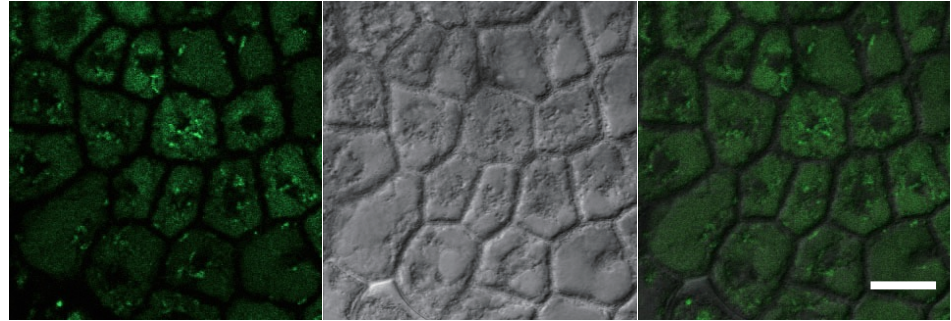

**B**

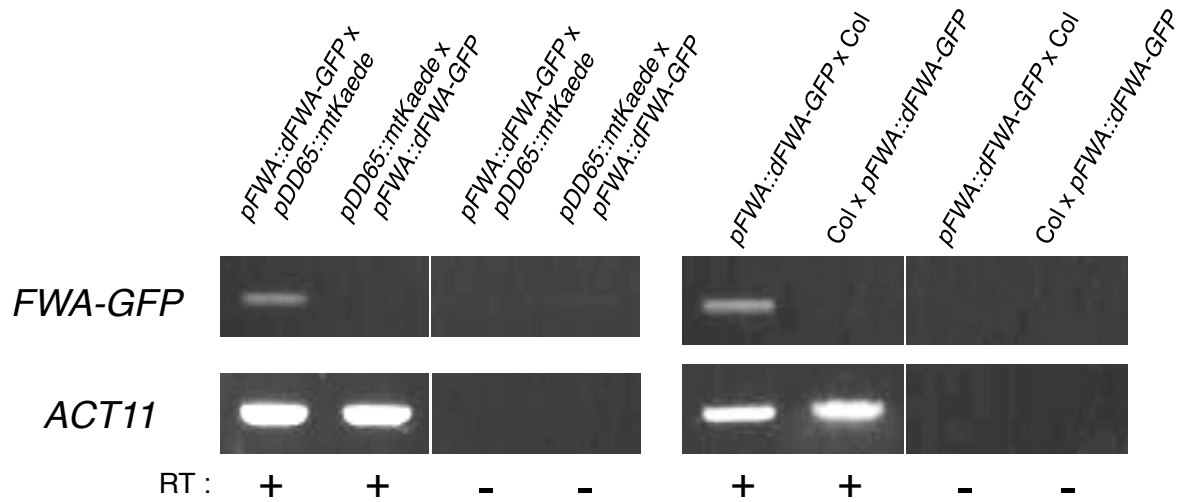

Fig.2-figure supplement 4

Supplement: supp [file elife-19573-supp-v1.zip › elife_poa_e19573_Figure_2_figure_supplement_4.pdf]

**A**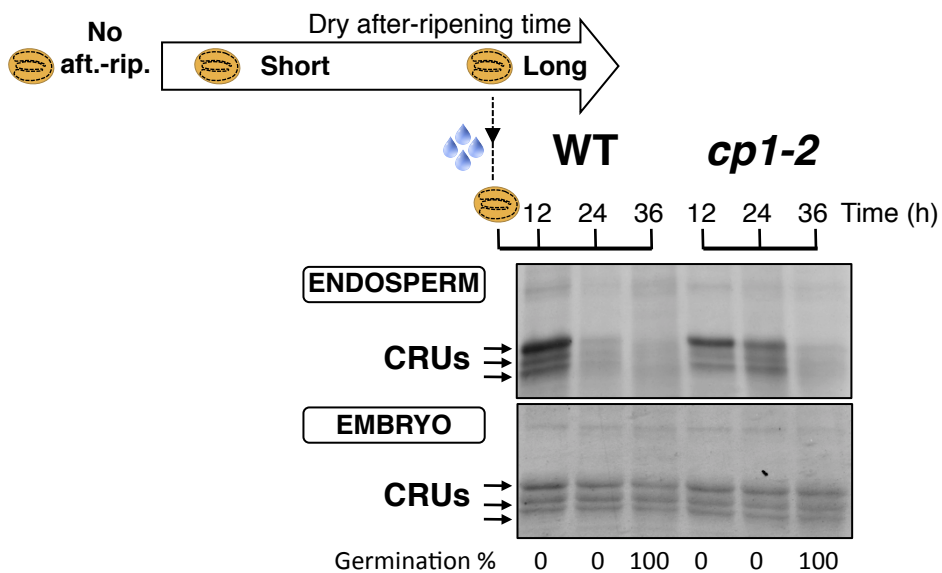**B**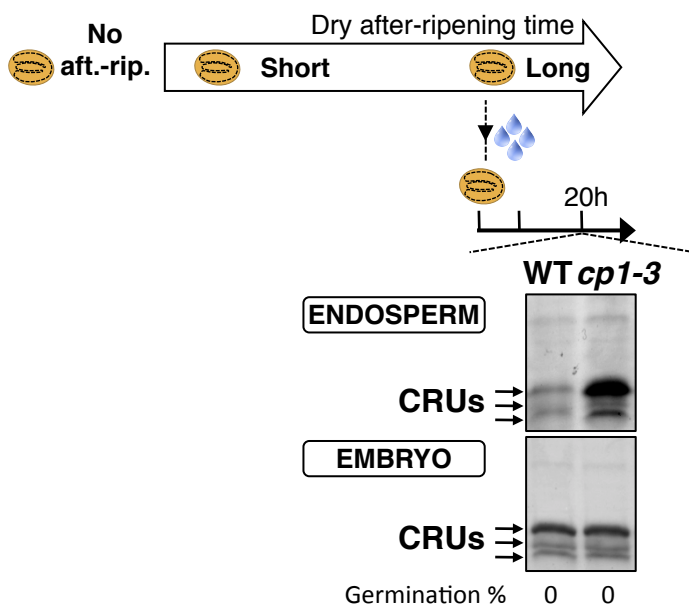

Fig.4-figure supplement 3

Supplement: supp [file elife-19573-supp-v1.zip › elife_poa_e19573_Figure_4_figure_supplement_3.pdf]

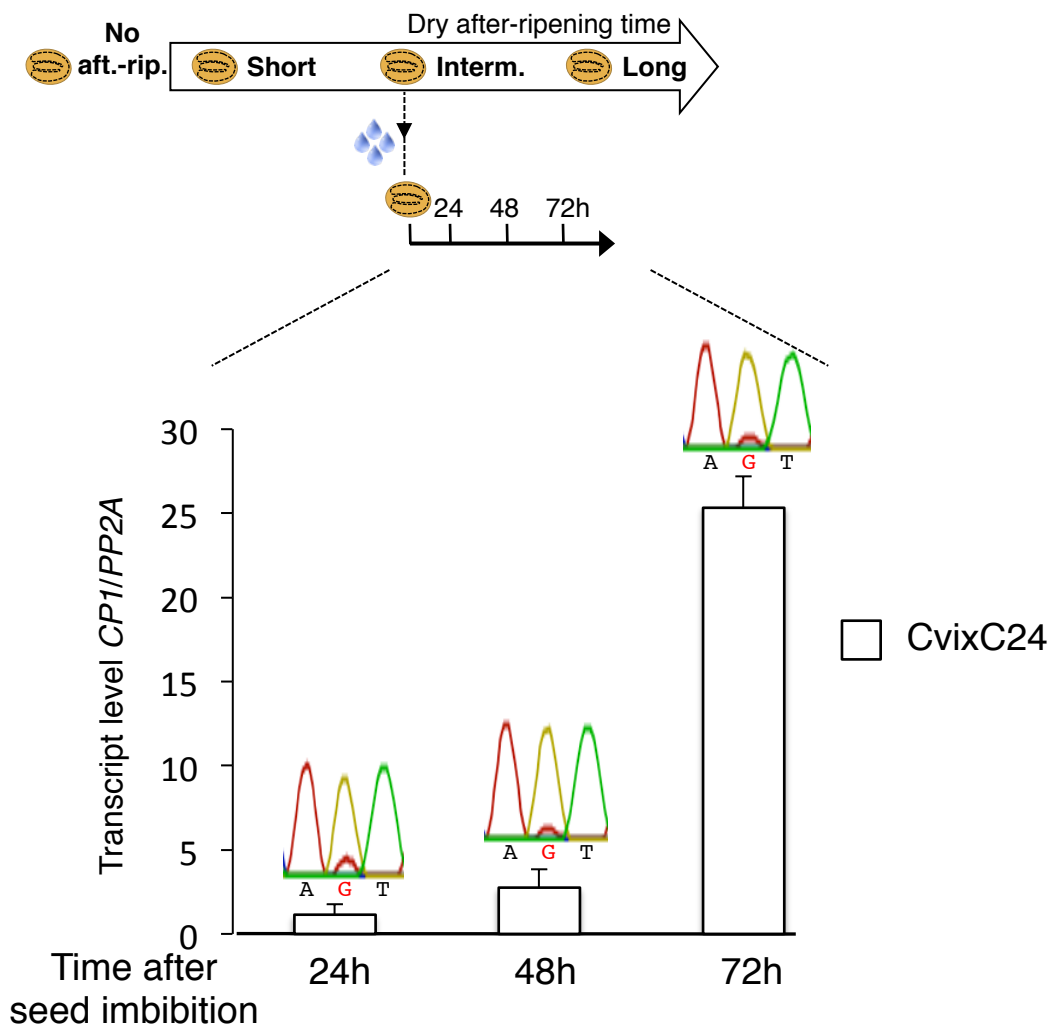

Fig.4-figure supplement 8

Supplement: supp [file elife-19573-supp-v1.zip › elife_poa_e19573_Figure_4_figure_supplement_8.pdf]

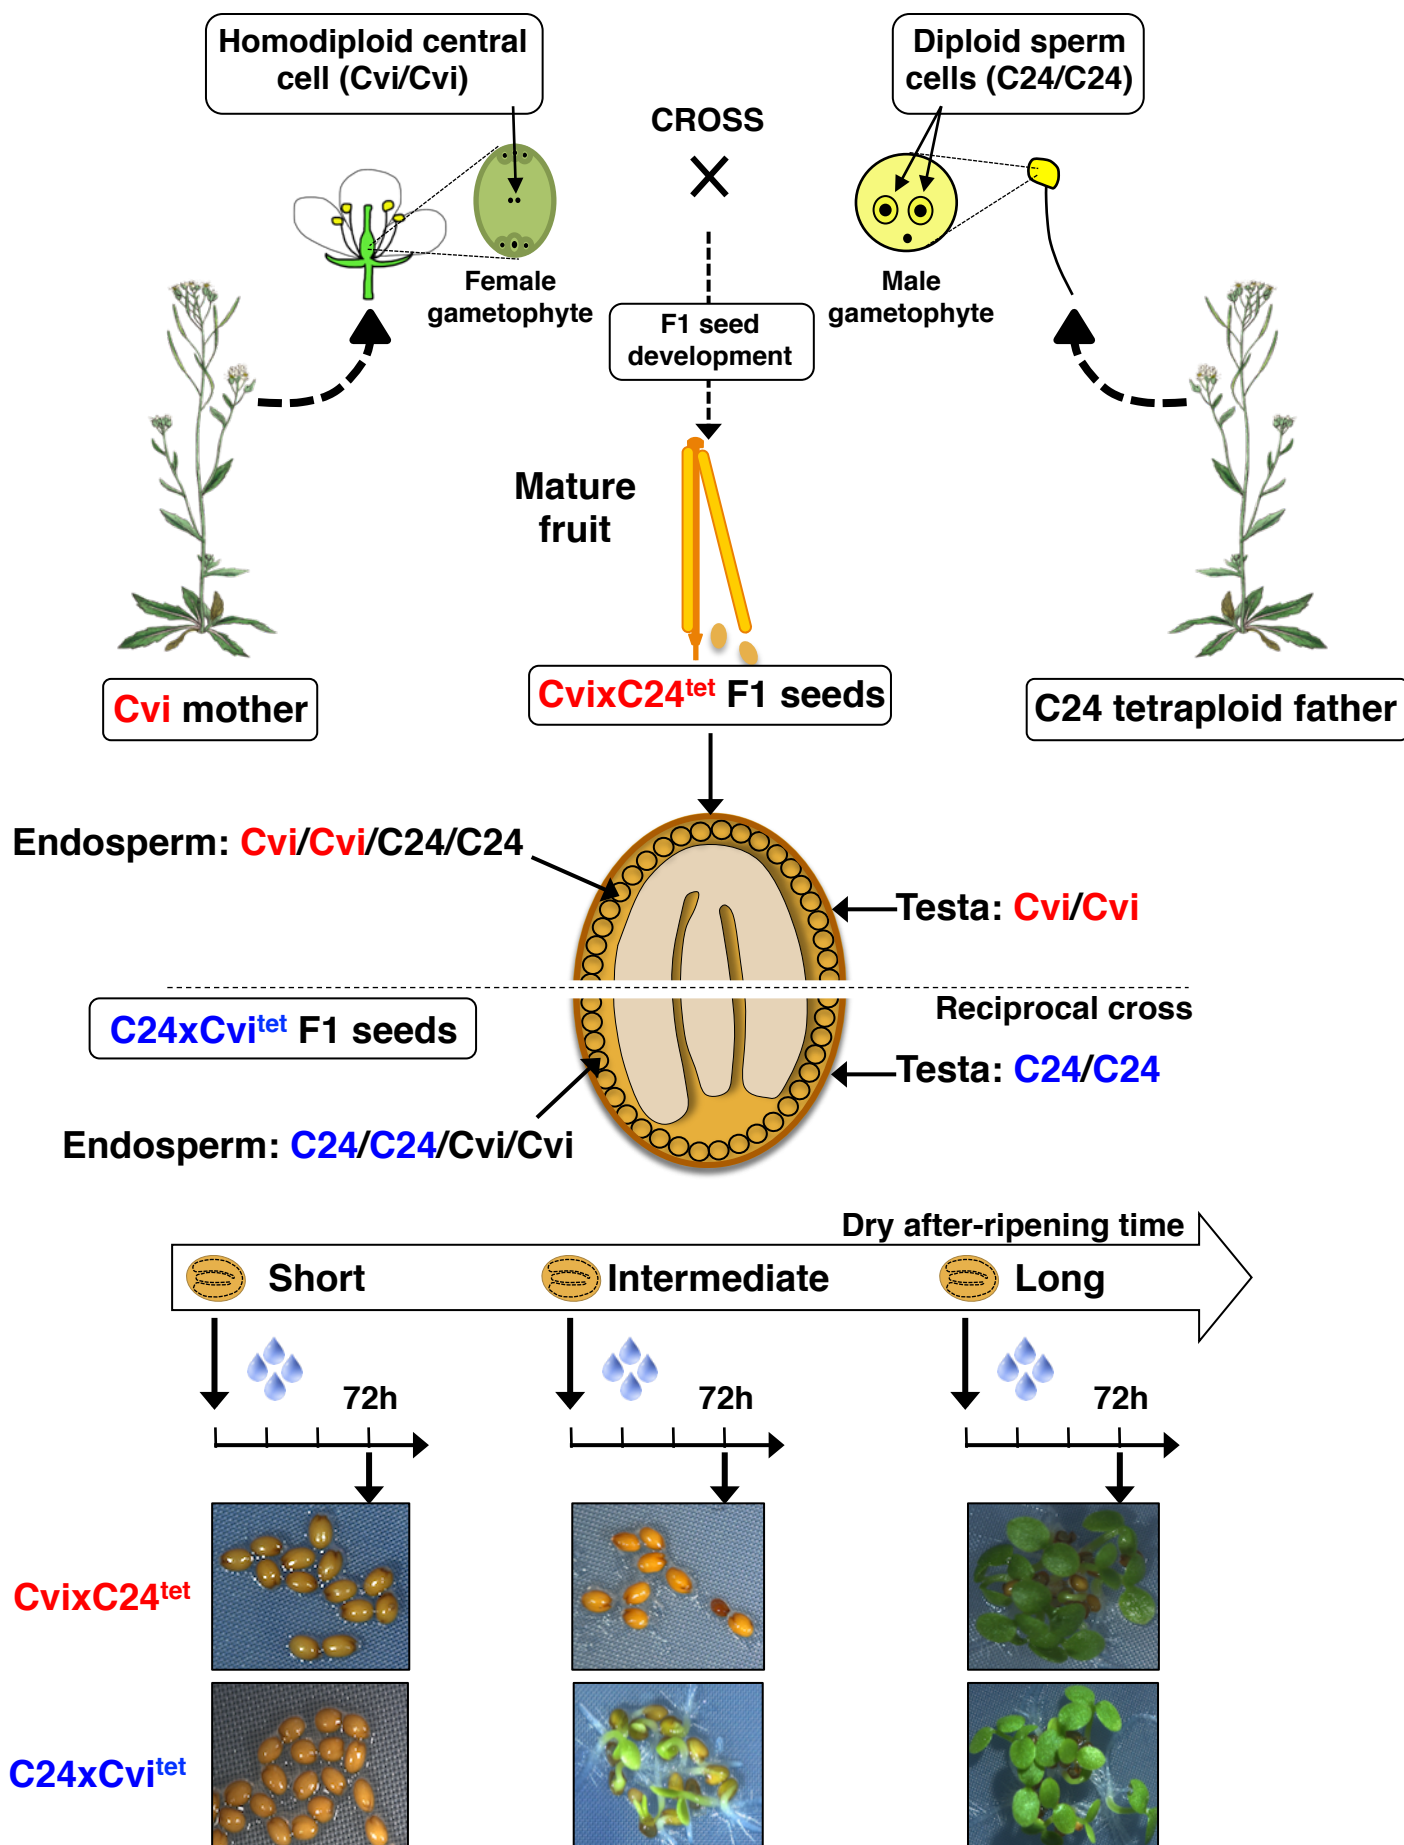

Fig.1-figure supplement 2

Supplement: supp [file elife-19573-supp-v1.zip › elife_poa_e19573_Figure_1_figure_supplement_2.pdf]

**A**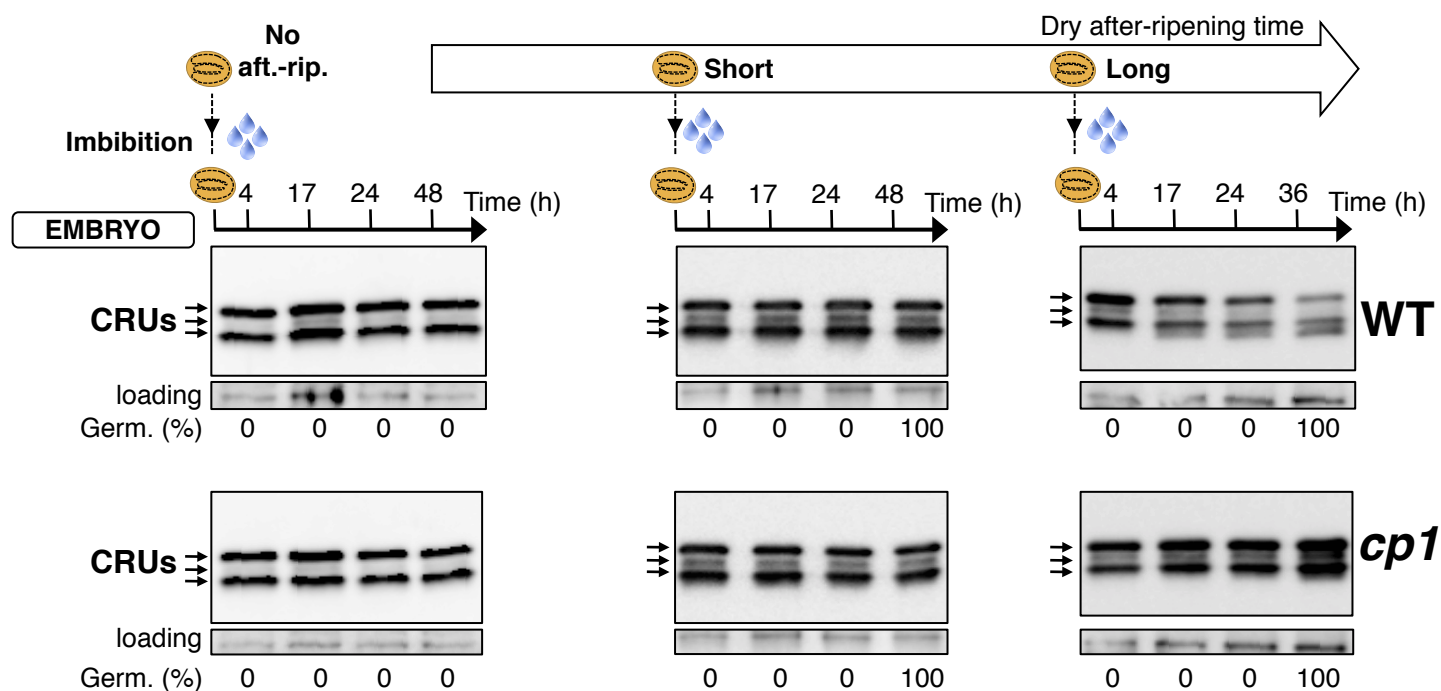**B**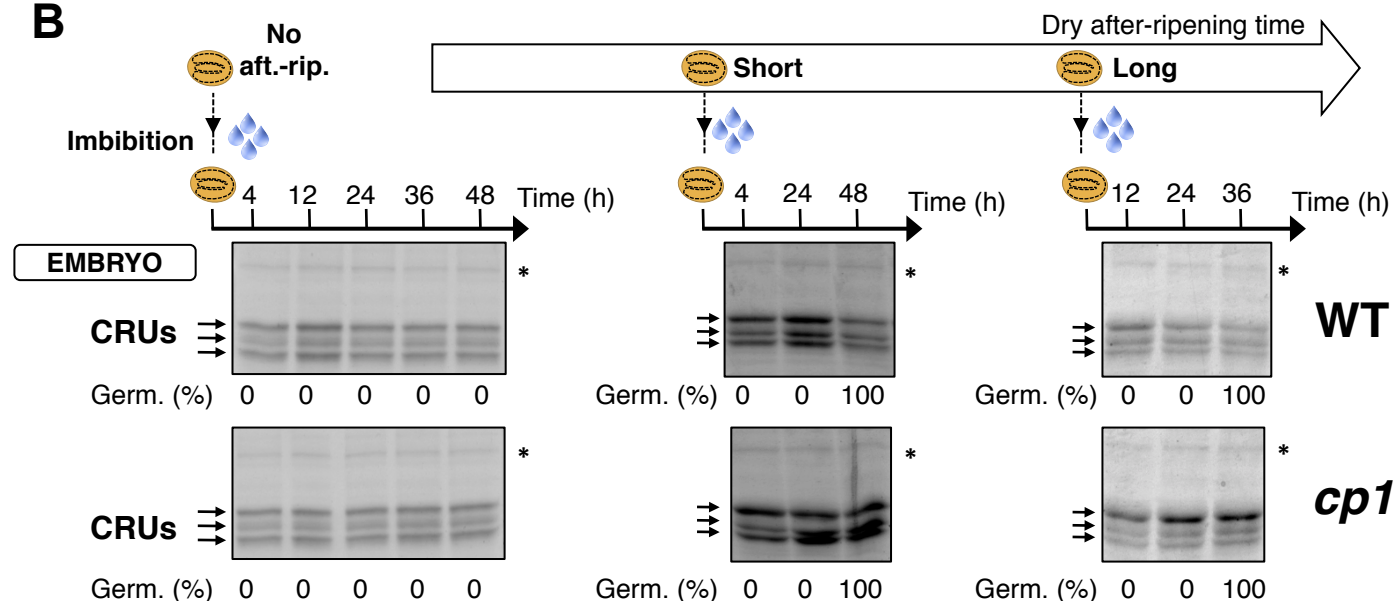

Fig.4-figure supplement 5

Supplement: supp [file elife-19573-supp-v1.zip › elife_poa_e19573_Figure_4_figure_supplement_5.pdf]

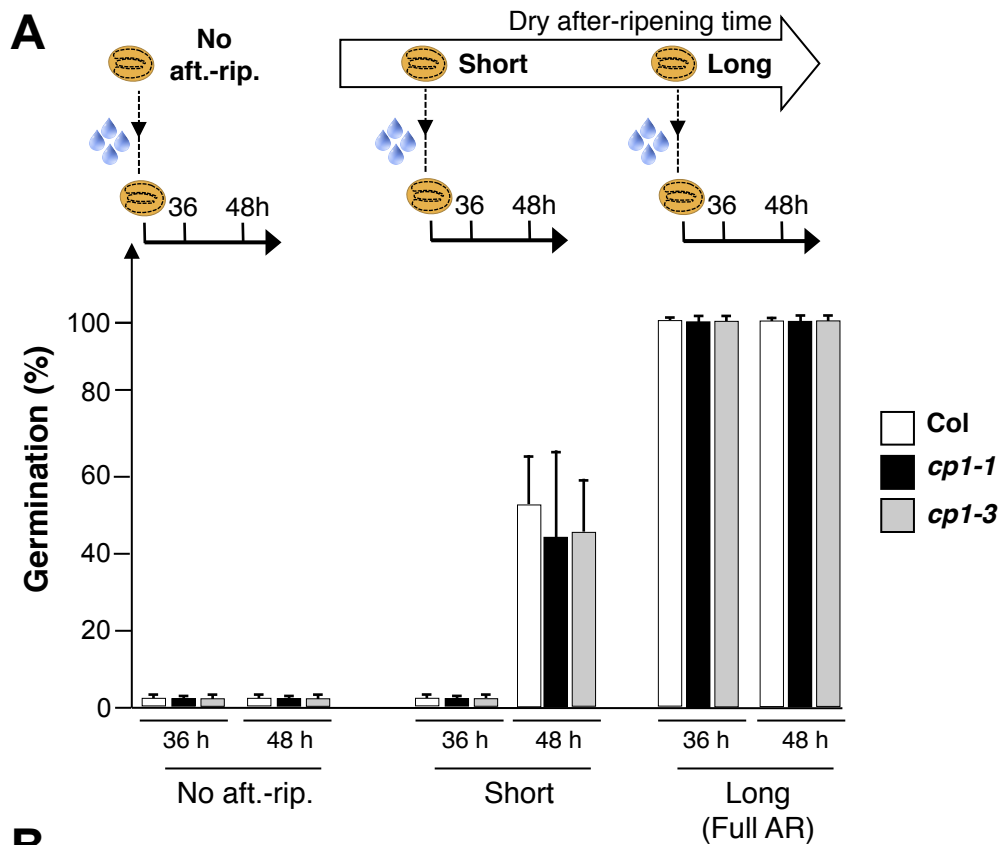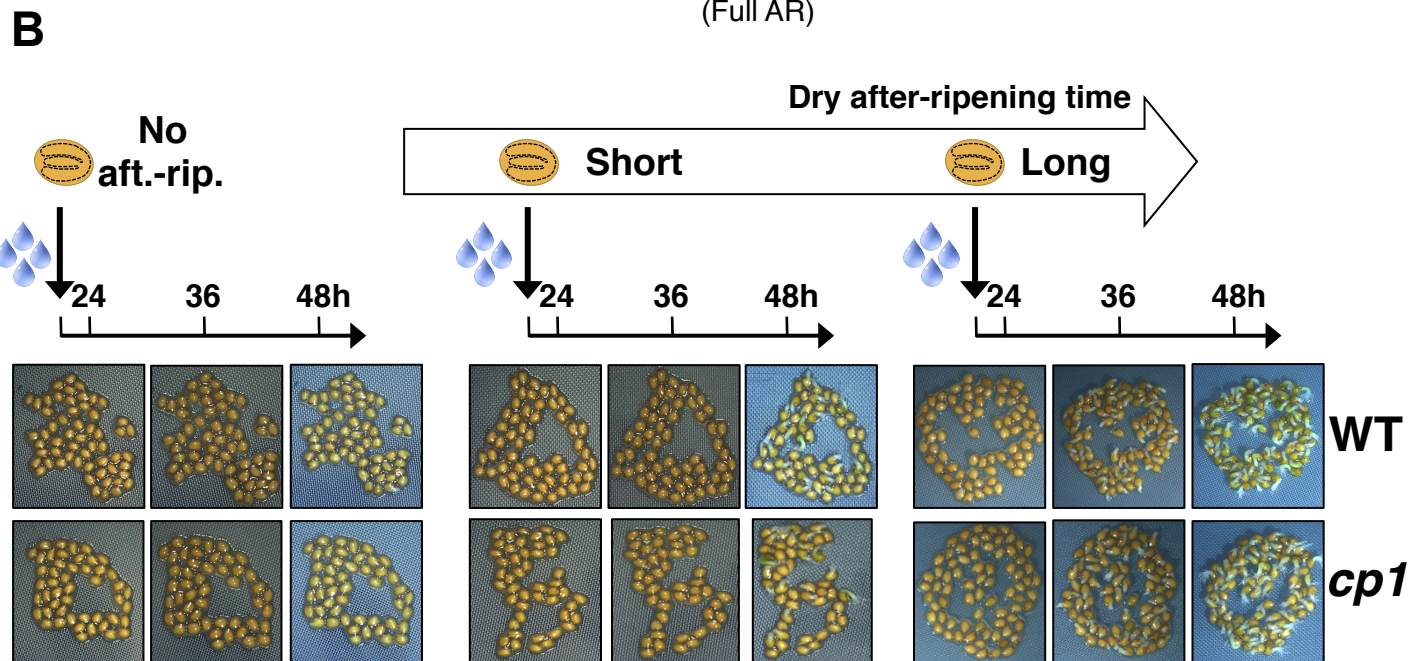

Fig.4-figure supplement 4

Supplement: supp [file elife-19573-supp-v1.zip › elife_poa_e19573_Figure_4_figure_supplement_4.pdf]

Dormant seeds

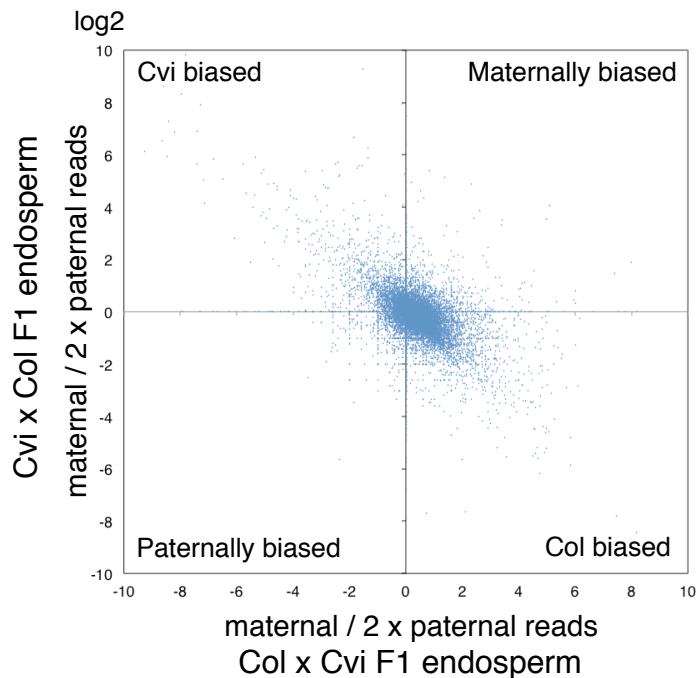

Non-dormant seeds

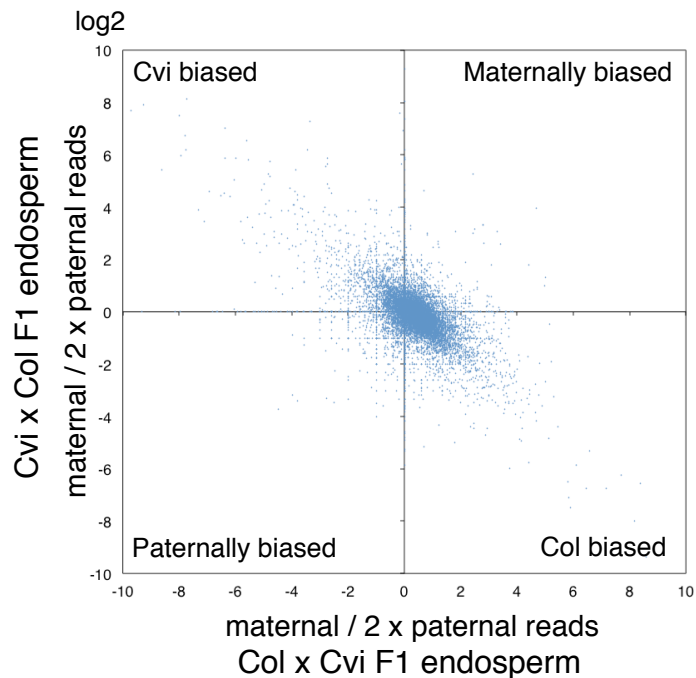

Fig.2-figure supplement 2

Supplement: supp [file elife-19573-supp-v1.zip › elife_poa_e19573_Figure_2_figure_supplement_2.pdf]

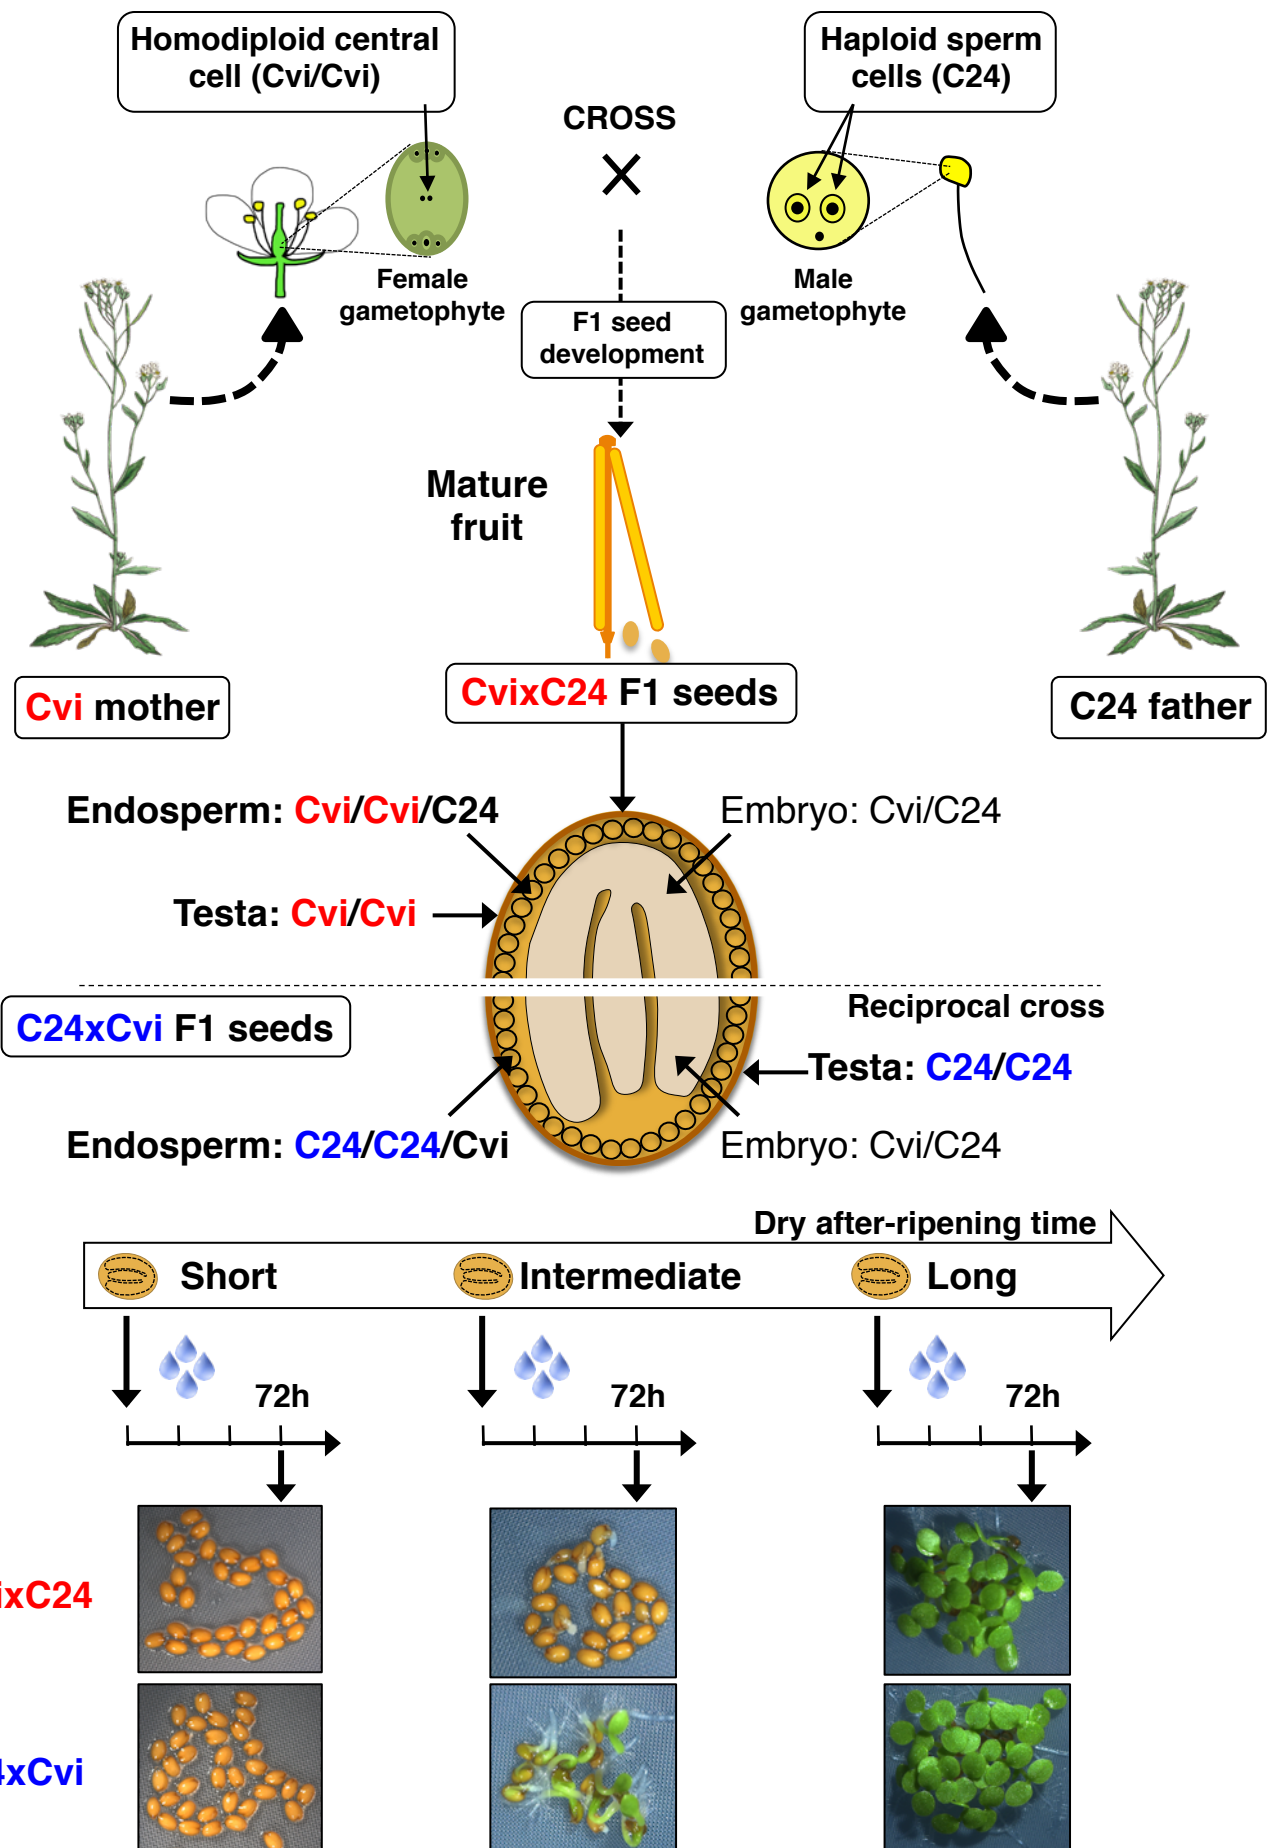

Fig.1-figure supplement 1

Supplement: supp [file elife-19573-supp-v1.zip › elife_poa_e19573_Figure_1_figure_supplement_1.pdf]

## Gene expression profile Col vs Cvi

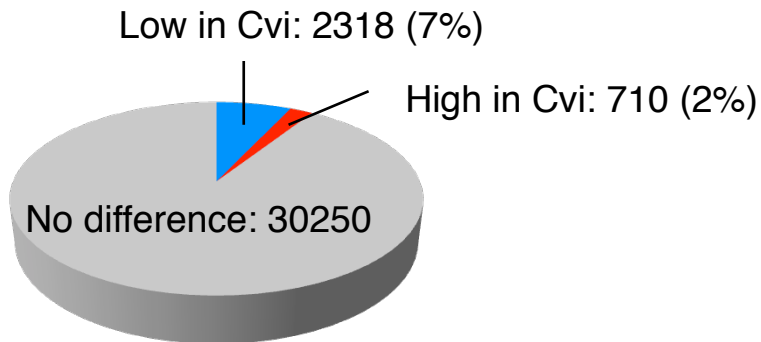

Fig.2-figure supplement 5

Supplement: supp [file elife-19573-supp-v1.zip › elife_poa_e19573_Figure_2_figure_supplement_5.pdf]

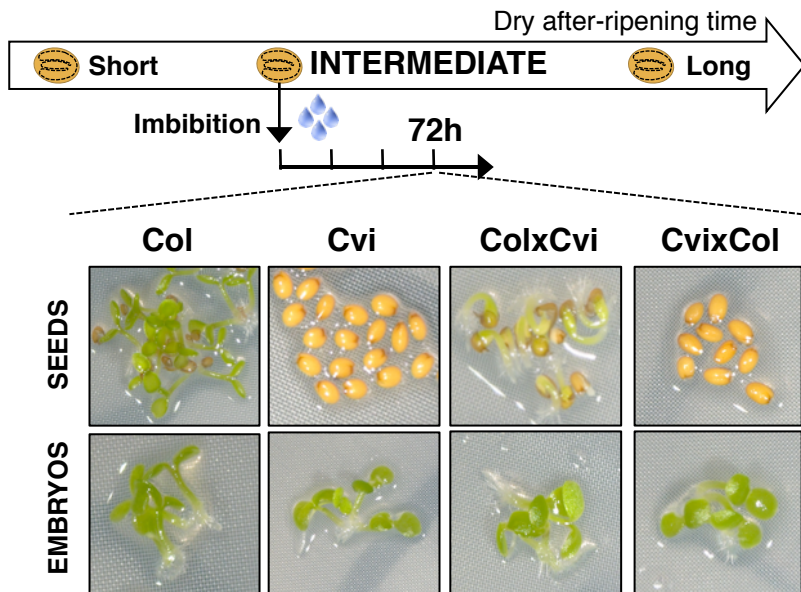

Fig.1-figure supplement 3

Supplement: supp [file elife-19573-supp-v1.zip › elife_poa_e19573_Figure_1_figure_supplement_3.pdf]

**A**

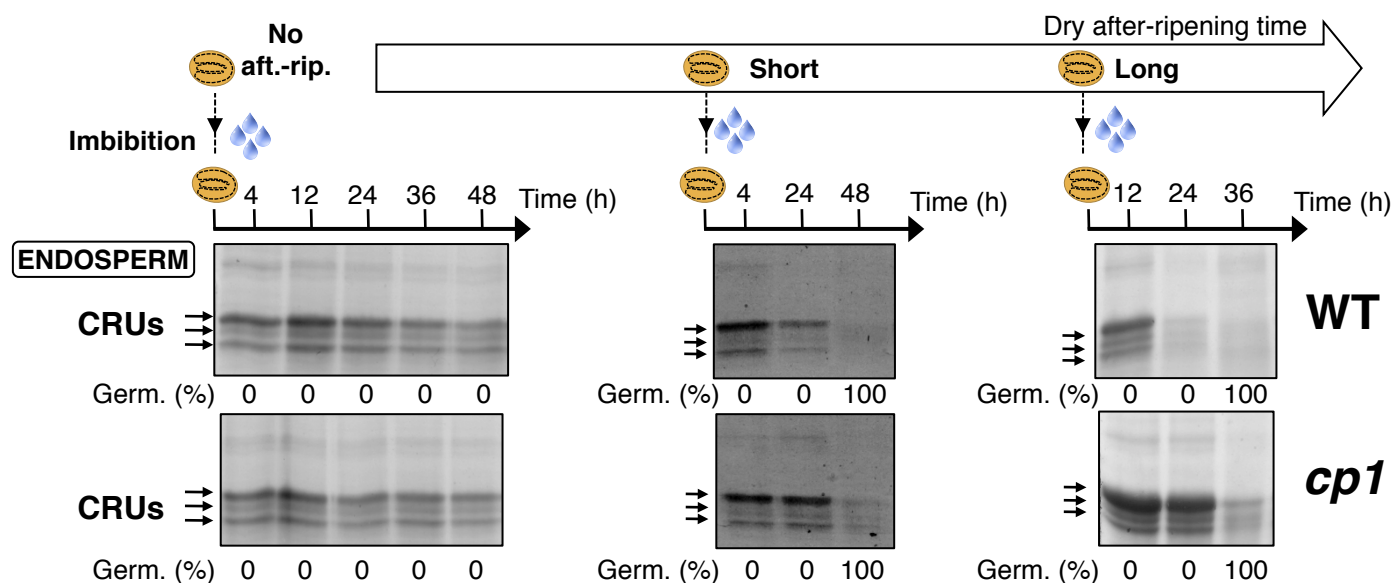

**B**

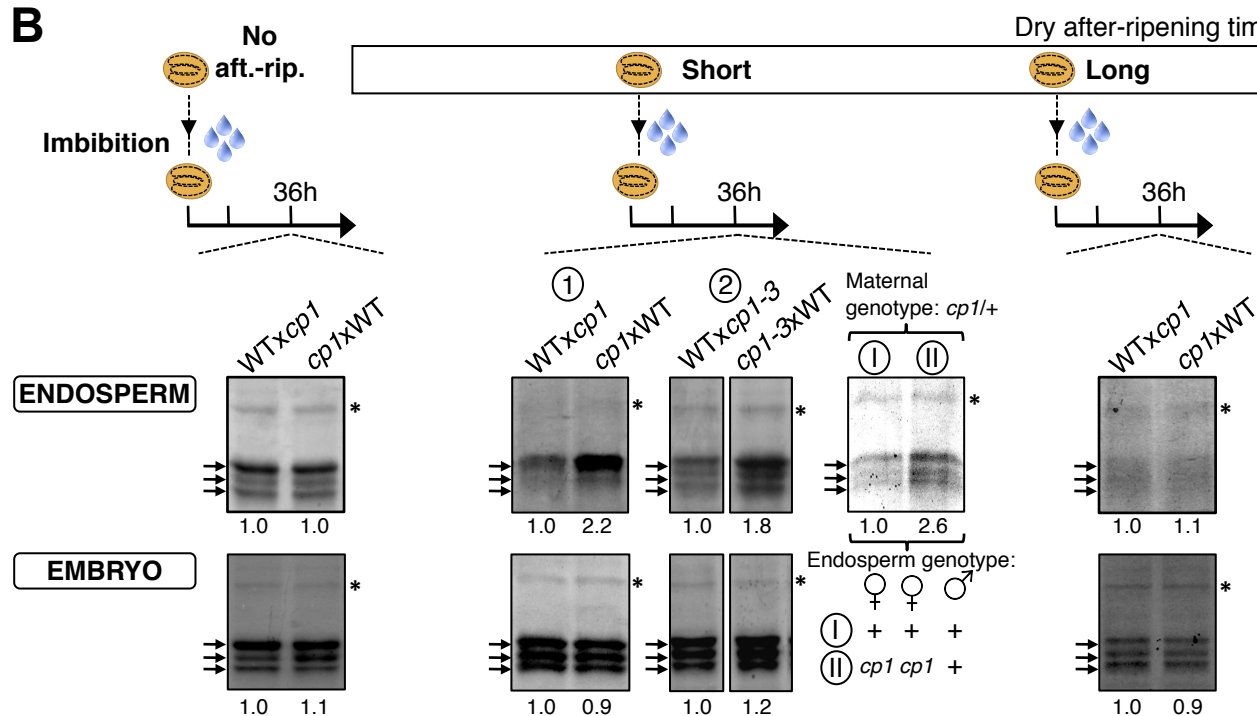

Fig.4-figure supplement 2

Supplement: supp [file elife-19573-supp-v1.zip › elife_poa_e19573_Figure_4_figure_supplement_2.pdf]

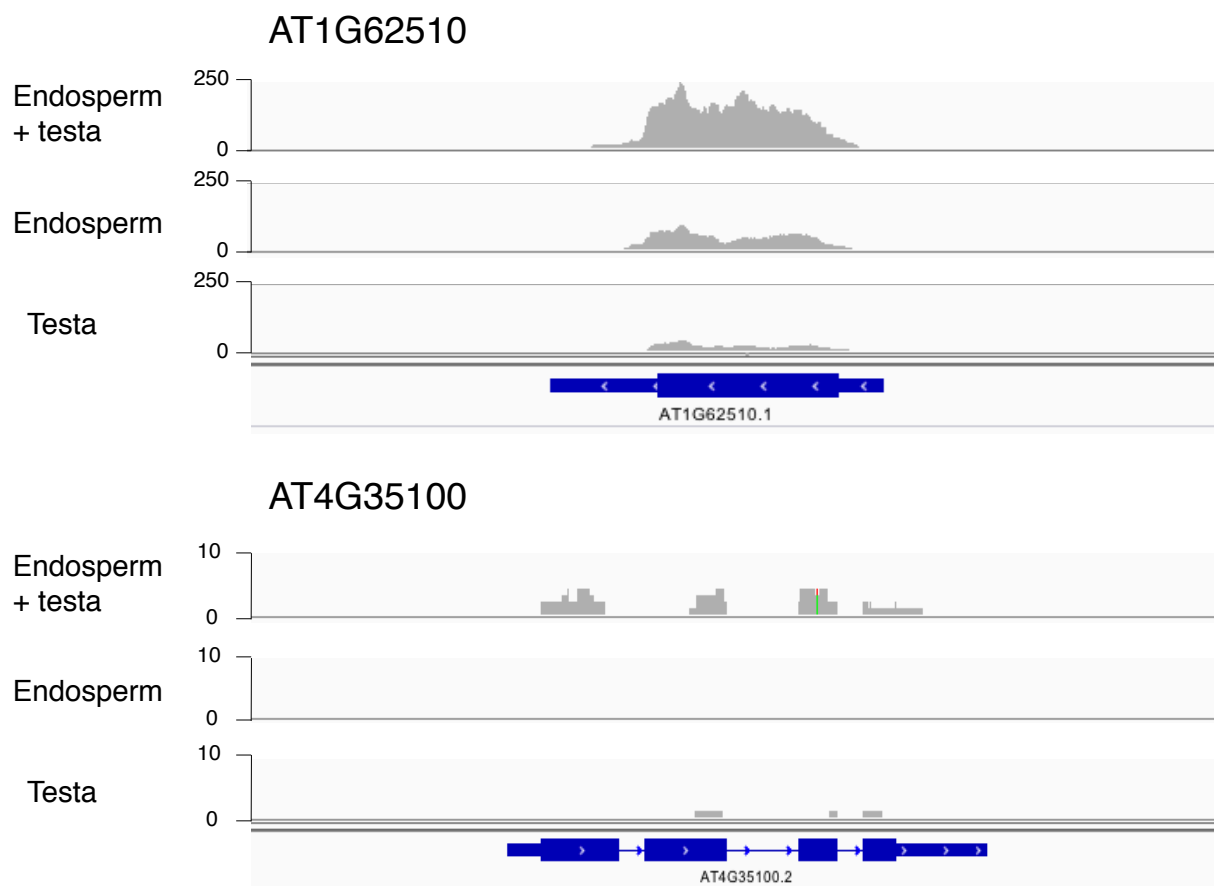

Fig.2-figure supplement 1

Supplement: supp [file elife-19573-supp-v1.zip › elife_poa_e19573_Figure_2_figure_supplement_1.pdf]

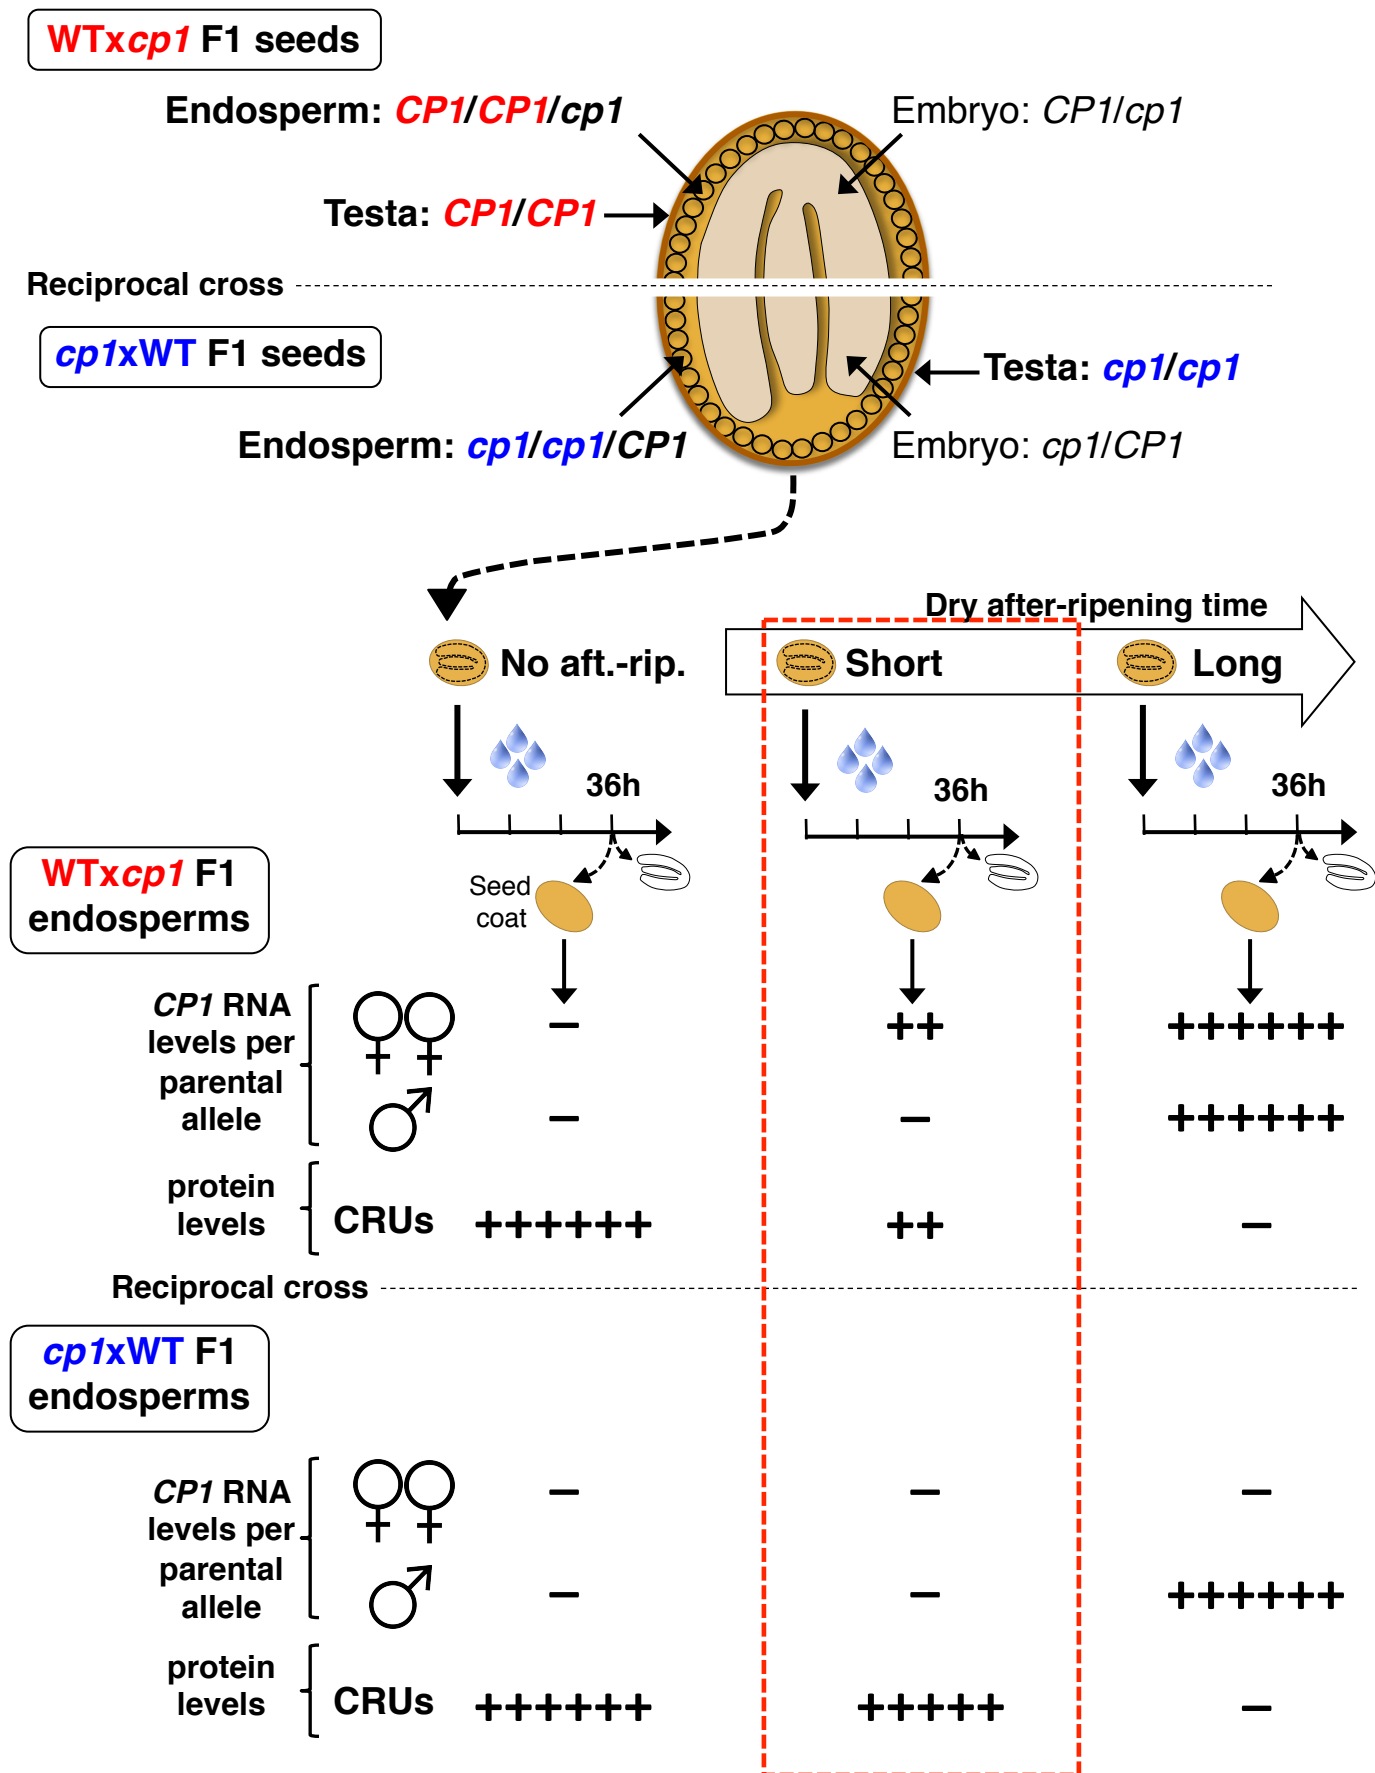

Fig.4-figure supplement 6

Supplement: supp [file elife-19573-supp-v1.zip › elife_poa_e19573_Figure_4_figure_supplement_6.pdf]

**A**

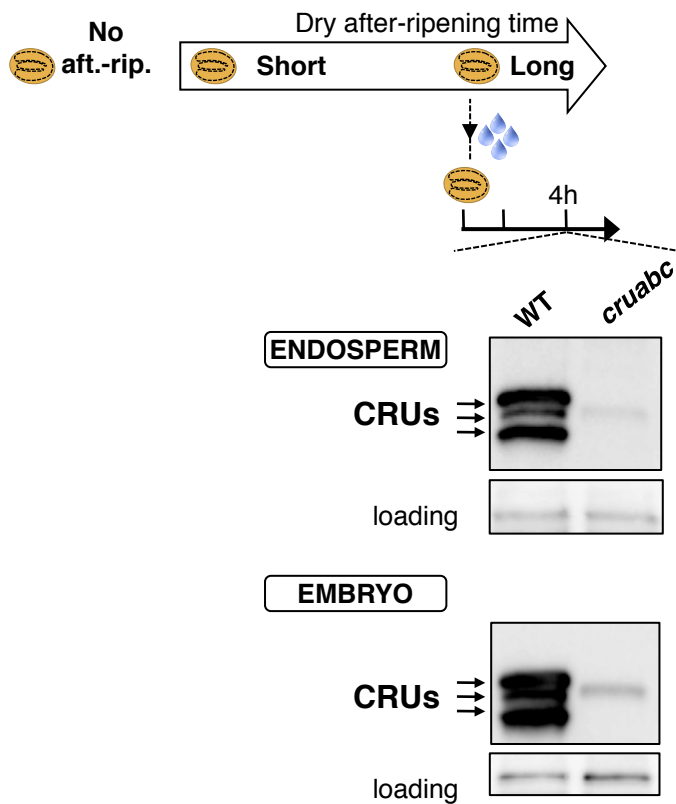

**B**

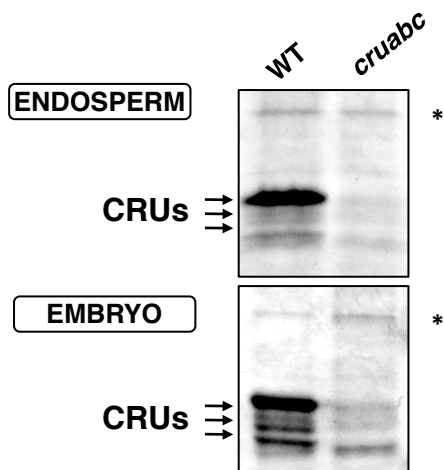

Fig.4-figure supplement 1

Supplement: supp [file elife-19573-supp-v1.zip › elife_poa_e19573_Figure_4_figure_supplement_1.pdf]
